# Supplementary material for: Variation in the nutrient content of different genotypes and varieties of millets, studied globally: a systematic review
Source: Frontiers journal article supplement (doi:10.3389/fsufs.2024.1324046), 2024-02-22
Supplement: Table_1.DOCX [file Table_1.DOCX]

**Table S1: Search strategy and key words**

| S. No. | Search Strategy and Key Words |
| --- | --- |
| 1 | Finger millet varieties. Repeat the search by replacing finger millet with other millets in the following list; "little millet", "foxtail millet", "barnyard millet", "proso millet", "kodo millet", "teff", "fonio", "job tears", "pearl millet", "finger millet", "sorghum” |
| 2 | Common name or local name of the millets. For example: adlay (job's tears), acha (fonio), samai (little millet), navane (foxtail millet) |
| 3 | Iron content of finger millet variety. Repeated the search with all the millets in the list and their varieties. |
| 4 | Zinc content of finger millet variety. Repeated the search with all the millets in the list and their varieties. |
| 5 | Calcium content of finger millet variety. Repeated the search with all the millets in the list and their varieties. |
| 6 | Mineral content of finger millet variety. Repeated the search with all the millets in the list and their varieties. |
| 7 | Search by using all the abo*v*e key words along with country and continent. |
| 8 | Hand search was done using the reference list of one paper to find other papers |

**Table S2. Estimation methods for macronutrients and mineral analysis used by different authors**

| **Parameters** | **Method of Determination** | **Publications** |
| --- | --- | --- |
| PROTEIN | Auto-analyser | 1, 5, 11, 18, 29, 50, 44, 72, 9,15, 46.1, 53 |
| Kjeldahl | 31, 46, 79, 4, 71, 78, 3, 85, 2, 19, 69, 98, 70, 36, 76, 42, 90, 28, 52, 95 |
| Combustion method | 6, 15, 49, 51, 75 |
| Near-infrared spectroscopy (NIRS) | 16, 33, 87, 97 |
| Lowry method (1951) | 41 |
| Titration method | 80, 88 |
| Gel electrophoresis and LOC (Lab-on-a-chip) technique | 95 |
| American Association of Cereal Chemist (AACC) | 96, 92 |
| FIBRE | Association of Official Agricultural Chemists (AOAC) | 46, 4, 85, 3, 21, 29, 70, 42, 52 |
| Near-infrared spectroscopy (NIRS) | 16, 33, 87, 97 |
| Alkali treatment method (Englyst and Hudson, 1987) | 26 |
| Maynard, 1970 | 31, 41 |
| Enzyme gravimetric method | 35, 95 |
| Fibre analyser | 50, 78, 95 |
| American Association of Cereal Chemist (AACC) | 98, 92 |
| Palic et al., 2007 | 49 |
| MOISTURE | Association of Official Agricultural Chemists (AOAC) | 31,46, 4, 3, 85, 21, 49, 69 70, 42, 90, 50 |
| Near-infrared spectroscopy (NIRS) | 33, 87 |
| American Association of Cereal Chemist (AACC) | 96, 98, 92 |
| CARBROHYDRATE | Differential method | 79, 4, 3, 21, 49, 70, 42 90 |
| Ion chromatography | 52 |
| Spectrophotometric method (Anthrone) | 31, 41 |
| Near-infrared spectroscopy (NIRS) | 33 |
| Arienzo et al., 2003 | 52 |
| American Association of Cereal Chemist (AACC) | 96 |
| ASH | Association of Official Agricultural Chemists (AOAC) | 31, 46, 79, 41, 3, 85, 21, 29, 49, 69, 70, 76, 42, 90, 50 , 52 |
| Near-infrared spectroscopy (NIRS) | 16, 87, 97 |
| American Association of Cereal Chemist (AACC) | 96, 98 |
| FAT | Soxhlet method | 31, 79, 41, 4, 3, 85, 2, 21, 29, 49, 69, 98, 70, 42, 90, 95 |
| Near-infrared spectroscopy (NIRS) | 33, 87, 97, 16 |
| American Association of Cereal Chemist (AACC) | 96, 92 |
| MINERALS | Atomic absorption spectrophotometry (AAS) | 41, 79, 46, 31, 4,1, 26, 80, 68, 6, 19, 29, 14, 55, 57, 34, 76, 15, 42, 75, 50, 43, 35, 11, 28, 18, 51, 33, 30, 27 |
| Inductively coupled plasma atomic emission spectroscopy (ICP-AES), or inductively coupled plasma (ICP-OES) | 2, 47, 3, 5, 16, 17, 9, 13,23,25, 46A, 49, 53, 72, 95, 24, 69 |
| Flame atomic absorption spectroscopy (FAAS) | 21 |
| Titration method (Calcium) | 31, 70, 77 |
| X-rays fluorescence (XFS) | 36, 37, 48, 47 |
| Colorimetric method (Iron) | 70 |
| Dithizone (DTZ) Staining method (Zinc) | 81 |
| Near-infrared spectroscopy (NIRS) | 97 |


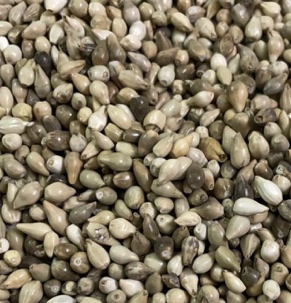

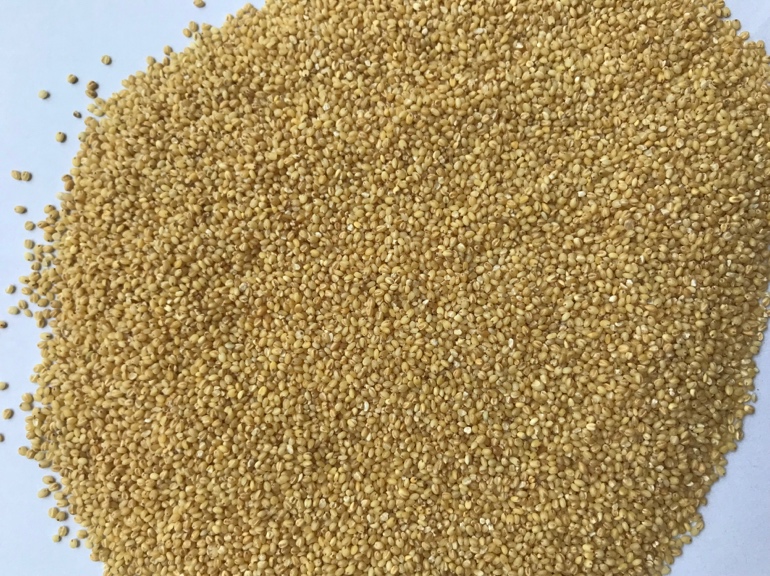

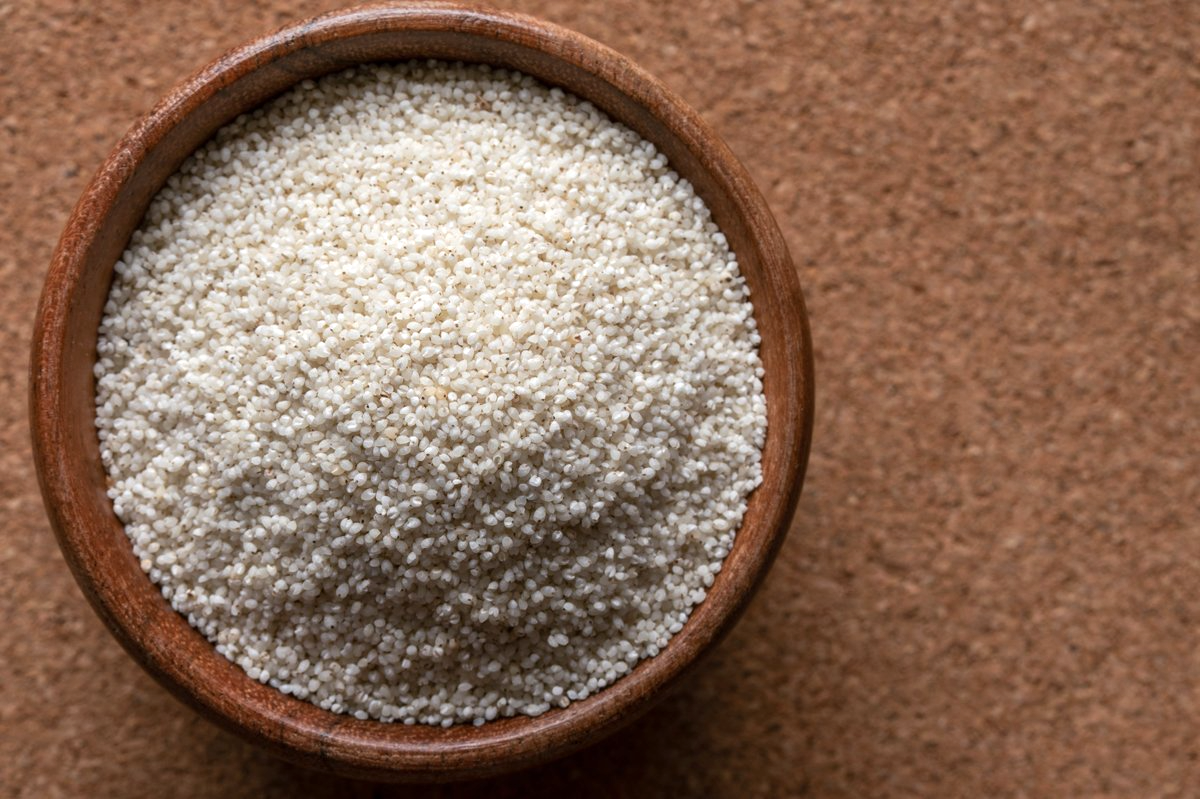

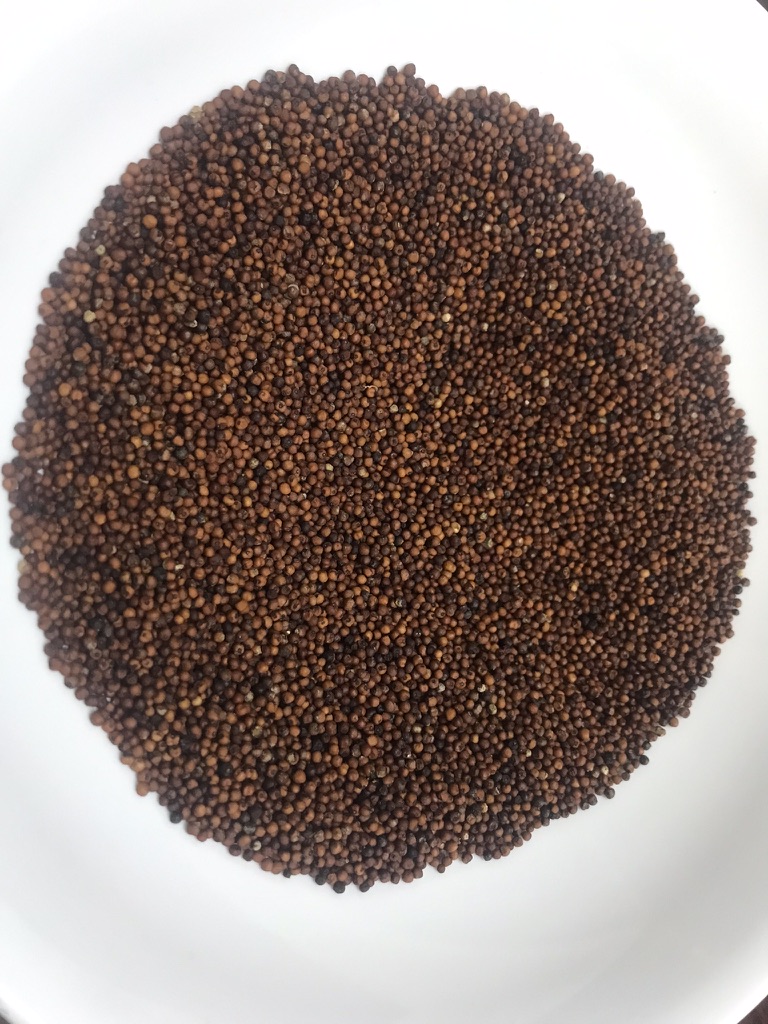

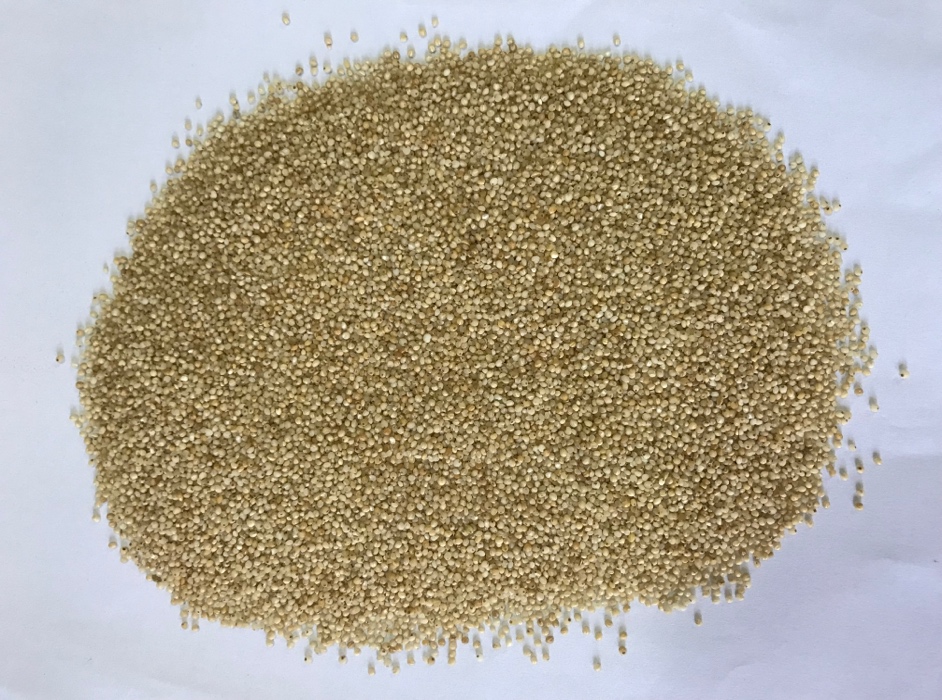

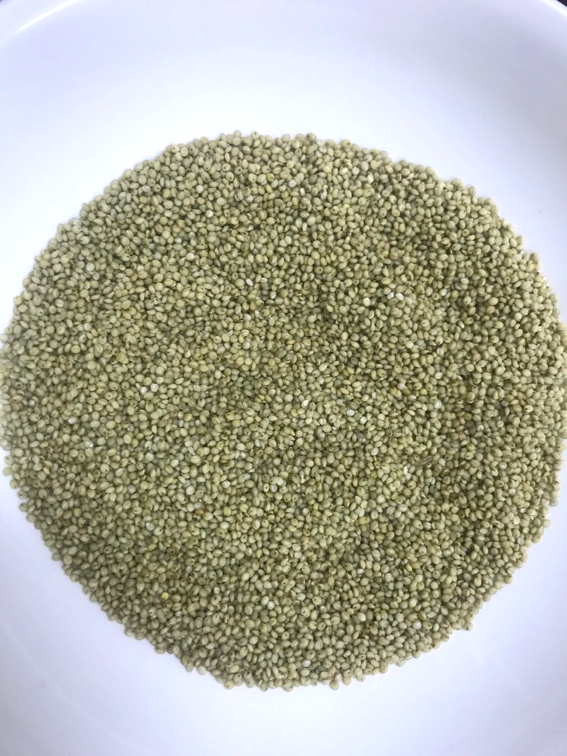

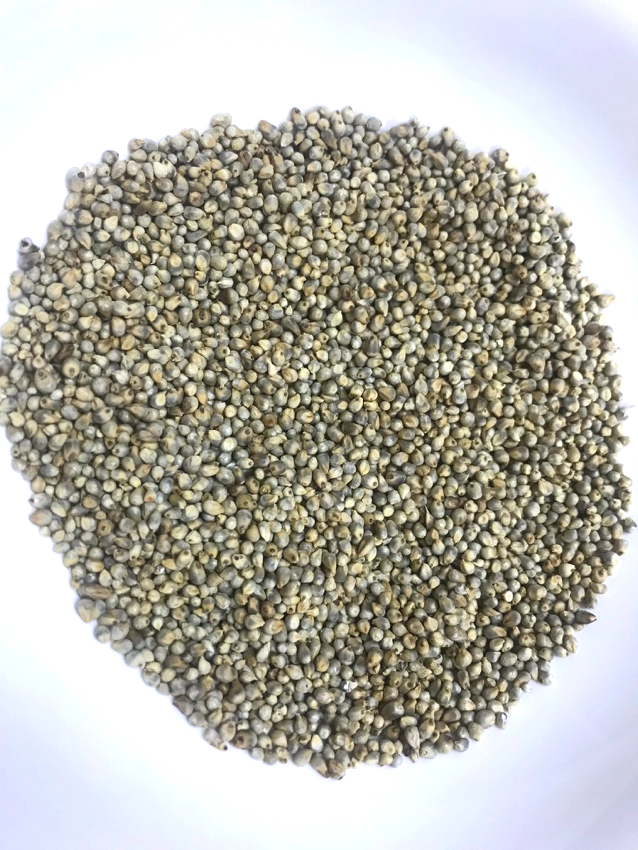

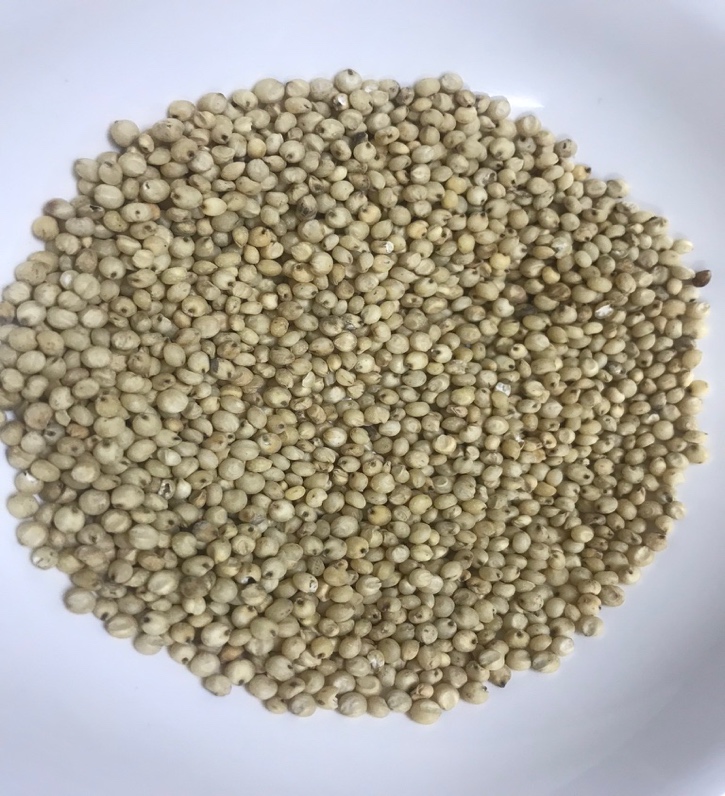

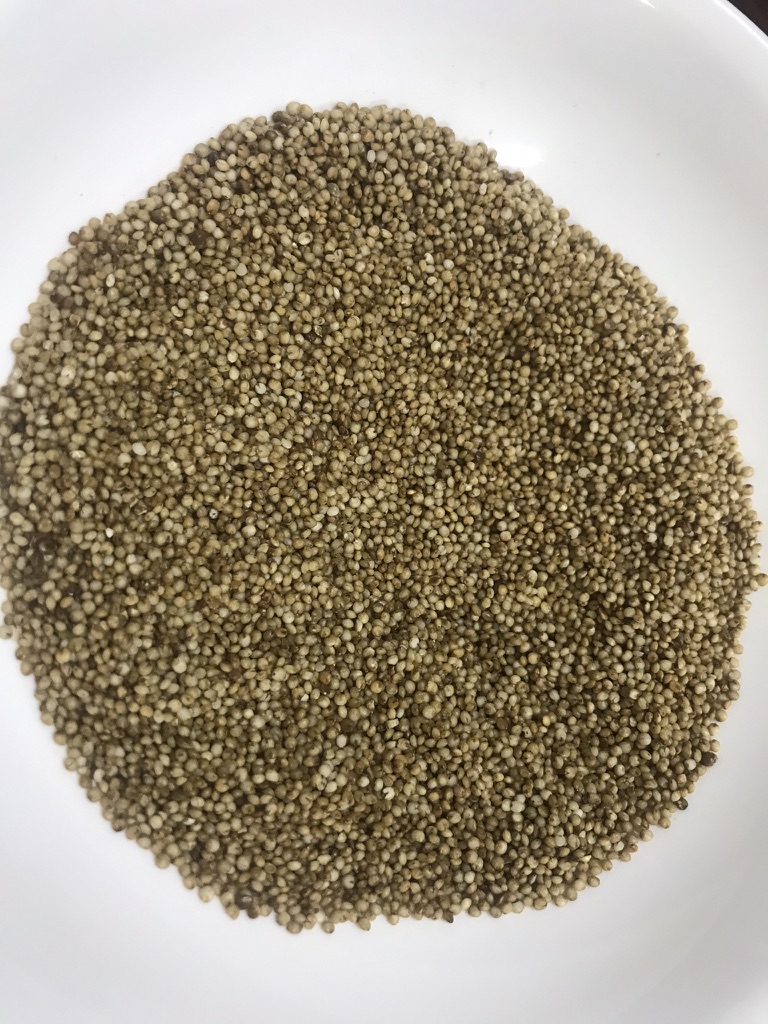

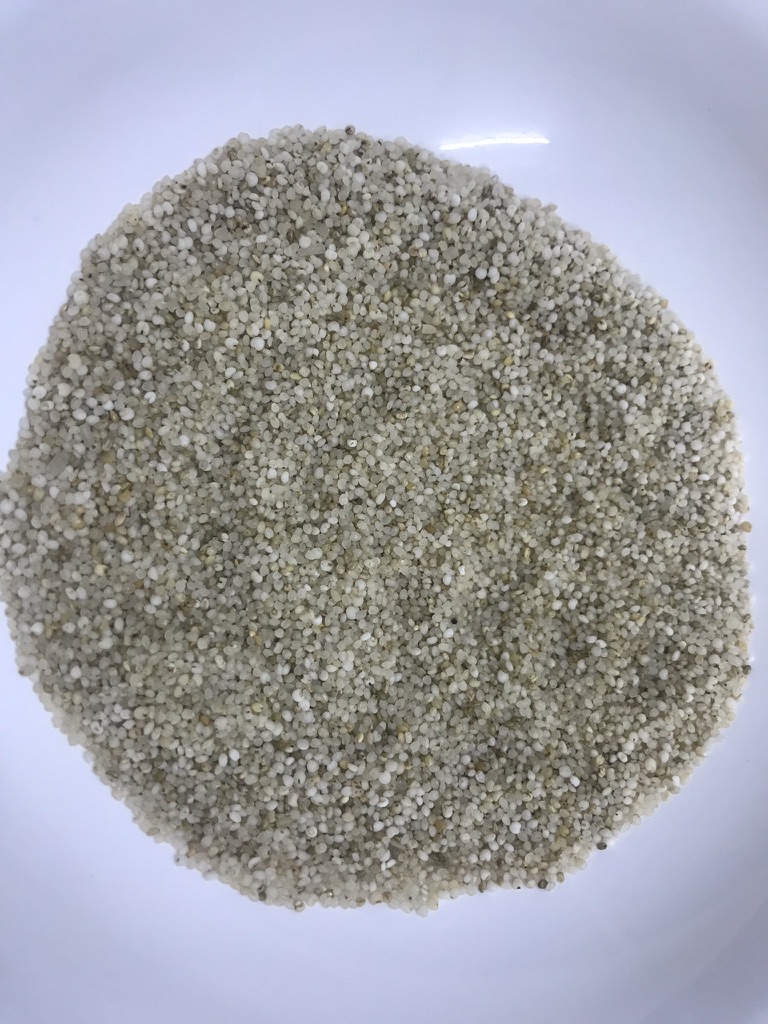

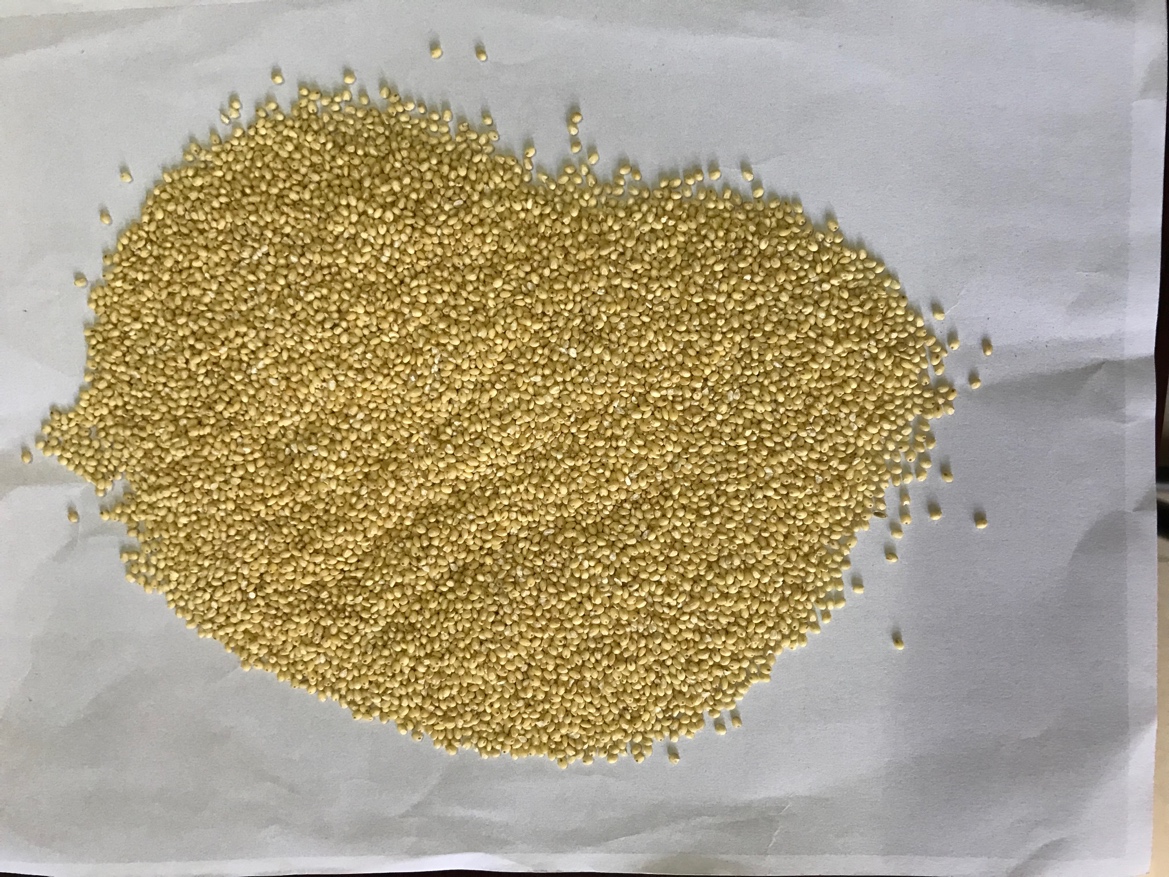

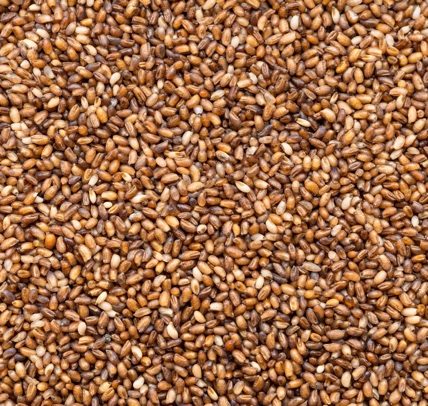


**A**

**C**

**E**

**F**

**G**

**H**

**I**

**K**

**B**

**D**

**J**

**L**

**Figure S1.** Different types of millets (unpolished)**; A** Barnyard millet (*Echinochloa esculenta*); **B** Browntop millet (*Brachiaria ramosa (L.) Stapf*) **C** Finger millet (*Eleusine coracana*); **D** Fonio (*Digitaria exilis Stapf*); **E** Foxtail millet (*Setaria italica*); **F** Job’s tears(*Coix lacryma-jobi L.*); **G** Kodo millet (*Paspalum scrobiculatum*); **H** Little millet (*Panicum sumatrense*); **I** Pearl millet (*Pennisetum glaucum*); **J** Proso millet (*Panicum miliaceum L.*); **K** Sorghum (*Sorghum bicolor*); **L** Teff (*Eragrostis tef (Zucc.) Trotter*).

**B**

**A**

**C**

**D**

**E**

**FF**

**G**

**Figure S2.** Loading plot of different millet varieties**; A** Barnyard millet (*Echinochloa esculenta*); **B** Finger millet (*Eleusine coracana*); **C** Fonio (*Digitaria exilis Stapf*); **D** Foxtail millet (*Setaria italica*); **E** Pearl millet (*Pennisetum glaucum*); **F** Sorghum (*Sorghum bicolor*); **G** Teff (*Eragrostis tef (Zucc.) Trotter*

**D**

**C**

**E**

**F**

**G**

**Figure S3.** Loading plot of different millet genotypes**; A** Browntop millet *(Brachiaria ramosa (L.) Stapf.)*; **B** Job’s tears *(Coix lacryma-jobi L.)*; **C** Finger millet (*Eleusine coracana*); **D** Foxtail millet (*Setaria italica*); **E** Pearl millet (*Pennisetum glaucum*); **F** Sorghum (*Sorghum bicolor*); **G** Teff (*Eragrostis tef (Zucc.) Trotter*)

**A**

**B**
