# Supplementary material for: Variation in the nutrient content of different genotypes and varieties of millets, studied globally: a systematic review
Source: Frontiers journal article supplement (doi:10.3389/fsufs.2024.1324046), 2024-02-22
Supplement: Table_2.XLSX [file Table_2.XLSX]

## Sheet: Proximates)Table 3
Nutrient	Millet	Variety Name	Quantity (g/100g)	Type of nutrient	Country	Author name	Remarks	Remarks	Remarks
Protein	Barnyard millet	IT153591	10.05		Korea	Kim et al. 2011	variety	variety
Protein	Barnyard millet	IT153599	11.3		Korea	Kim et al. 2011	variety	variety
Protein	Barnyard millet	IT153600	14.75		Korea	Kim et al. 2011	variety	variety
Protein	Barnyard millet	IT153604	11.36		Korea	Kim et al. 2011	variety	variety
Protein	Barnyard millet	IT153607	10.29		Korea	Kim et al. 2011	variety	variety
Protein	Barnyard millet	IT170609	11.36		Korea	Kim et al. 2011	variety	variety
Protein	Barnyard millet	IT170610	13.86		Korea	Kim et al. 2011	variety	variety
Protein	Barnyard millet	IT186707	10.65		Korea	Kim et al. 2011	variety	variety
Protein	Barnyard millet	K141285	14.28		Korea	Kim et al. 2011	variety	variety
Protein	Barnyard millet	K141286	10.47		Korea	Kim et al. 2011	variety	variety
Protein	Barnyard millet	K141287	10.53		Korea	Kim et al. 2011	variety	variety
Protein	Barnyard millet	K141288	13.68		Korea	Kim et al. 2011	variety	variety
Protein	Barnyard millet	K141289	14.1		Korea	Kim et al. 2011	variety	variety
Protein	Brown top millet	BTAVT6	11.64		India	Hemamalini et al. 2021	variety	variety
Protein	Brown top millet	IC 606693	10.33		India	Niharika et al 2020	genotype	genotype/accession
Protein	Brown top millet	IC 613546	10.5		India	Niharika et al 2021	genotype	genotype/accession
Protein	Brown top millet	IC 613547	9.81		India	Niharika et al 2022	genotype	genotype/accession
Protein	Brown top millet	IC 613548	9.11		India	Niharika et al 2023	genotype	genotype/accession
Protein	Brown top millet	IC 613549	10.85		India	Niharika et al 2024	genotype	genotype/accession
Protein	Brown top millet	IC 613550	9.28		India	Niharika et al 2025	genotype	genotype/accession
Protein	Brown top millet	IC 613551	11.91		India	Niharika et al 2026	genotype	genotype/accession
Protein	Brown top millet	IC 613552	12.26		India	Niharika et al 2027	genotype	genotype/accession
Protein	Brown top millet	IC 613553	9.98		India	Niharika et al 2028	genotype	genotype/accession
Protein	Brown top millet	IC 613554	11.38		India	Niharika et al 2029	genotype	genotype/accession
Protein	Brown top millet	IC 613555	11.73		India	Niharika et al 2030	genotype	genotype/accession
Protein	Brown top millet	IC 613556	19.33		India	Niharika et al 2031	genotype	genotype/accession
Protein	Brown top millet	IC 613557	9.81		India	Niharika et al 2032	genotype	genotype/accession
Protein	Brown top millet	IC 613558	10.16		India	Niharika et al 2033	genotype	genotype/accession
Protein	Brown top millet	IC 613559	10.68		India	Niharika et al 2034	genotype	genotype/accession
Protein	Brown top millet	IC 613560	8.93		India	Niharika et al 2035	genotype	genotype/accession
Protein	Brown top millet	IC 613561	11.12		India	Niharika et al 2036	genotype	genotype/accession
Protein	Brown top millet	IC 613562	10.16		India	Niharika et al 2037	genotype	genotype/accession
Protein	Brown top millet	IC 617952	10.86		India	Niharika et al 2038	genotype	genotype/accession
Protein	Brown top millet	IC 617953	9.98		India	Niharika et al 2039	genotype	genotype/accession
Protein	Brown top millet	IC 617954	11.03		India	Niharika et al 2040	genotype	genotype/accession
Protein	Brown top millet	IC 617955	11.64		India	Niharika et al 2041	genotype	genotype/accession
Protein	Brown top millet	IC 617956	10.33		India	Niharika et al 2042	genotype	genotype/accession
Protein	Brown top millet	IC 617957	9.46		India	Niharika et al 2043	genotype	genotype/accession
Protein	Brown top millet	IC 617958	10.51		India	Niharika et al 2044	genotype	genotype/accession
Protein	Brown top millet	IC 617959	10.33		India	Niharika et al 2045	genotype	genotype/accession
Protein	Brown top millet	IC 617960	9.81		India	Niharika et al 2046	genotype	genotype/accession
Protein	Brown top millet	IC 617961	9.63		India	Niharika et al 2047	genotype	genotype/accession
Protein	Brown top millet	IC 617962	10.16		India	Niharika et al 2048	genotype	genotype/accession
Protein	Brown top millet	28 bijapur collection	10.51		India	Niharika et al 2049	genotype	genotype/accession
Protein	Finger millet	IE 588	8.8		India	Upadhyaya et al. 2011a	Accession	Accession/ genotype
Protein	Finger millet	IE 615	7.67		India	Upadhyaya et al. 2011a	Accession	Accession/ genotype
Protein	Finger millet	IE 817	8.17		India	Upadhyaya et al. 2011a	Accession	Accession/ genotype
Protein	Finger millet	IE 886	7.95		Pakistan	Upadhyaya et al. 2011a	Accession	Accession/ genotype
Protein	Finger millet	IE 1023	7.55		Unknown	Upadhyaya et al. 2011a	Accession	Accession/ genotype
Protein	Finger millet	IE 2008	7.53		India	Upadhyaya et al. 2011a	Accession	Accession/ genotype
Protein	Finger millet	IE 2030	7.1		India	Upadhyaya et al. 2011a	Accession	Accession/ genotype
Protein	Finger millet	IE 2568	7.41		Kenya	Upadhyaya et al. 2011a	Accession	Accession/ genotype
Protein	Finger millet	IE 2608	7.72		Malawi	Upadhyaya et al. 2011a	Accession	Accession/ genotype
Protein	Finger millet	IE 2921	9.35		Malawi	Upadhyaya et al. 2011a	Accession	Accession/ genotype
Protein	Finger millet	IE 3025	8.52		Ethiopia	Upadhyaya et al. 2011a	Accession	Accession/ genotype
Protein	Finger millet	IE 3120	8.72		India	Upadhyaya et al. 2011a	Accession	Accession/ genotype
Protein	Finger millet	IE 4443	8.81		Cameroon	Upadhyaya et al. 2011a	Accession	Accession/ genotype
Protein	Finger millet	IE 4476	9.01		Zimbabwe	Upadhyaya et al. 2011a	Accession	Accession/ genotype
Protein	Finger millet	IE 4708	9.51		Burundi	Upadhyaya et al. 2011a	Accession	Accession/ genotype
Protein	Finger millet	IE 4709	9.95		Burundi	Upadhyaya et al. 2011a	Accession	Accession/ genotype
Protein	Finger millet	IE 4734	8.01		India	Upadhyaya et al. 2011a	Accession	Accession/ genotype
Protein	Finger millet	IE 4817	8.76		India	Upadhyaya et al. 2011a	Accession	Accession/ genotype
Protein	Finger millet	IE 6537	11.09		Nigeria	Upadhyaya et al. 2011a	Accession	Accession/ genotype
Protein	Finger millet	IE 0009	10.44		India	Upadhyaya et al. 2011a	Accession	Accession/ genotype
Protein	Finger millet	IE 6541	9.46		Nigeria	Upadhyaya et al. 2011a	Accession	Accession/ genotype
Protein	Finger millet	IE 6546	9.3		Nigeria	Upadhyaya et al. 2011a	Accession	Accession/ genotype
Protein	Finger millet	IE 2090	8.79		India	Upadhyaya et al. 2011a	Accession	Accession/ genotype
Protein	Finger millet	IE 3101	8.66		India	Upadhyaya et al. 2011a	Accession	Accession/ genotype
Protein	Finger millet	IE 2043 (PR202)	6.87		India	Upadhyaya et al. 2011a	Commercial Released variety	variety
Protein	Finger millet	IE 3618 (RAU 8)	7.27		India	Upadhyaya et al. 2011a	Accession	Accession/ genotype
Protein	Finger millet	IE 4673 (VL149)	7.14		India	Upadhyaya et al. 2011a	Accession	Accession/ genotype
Protein	Finger millet	VR 708	7.91		India	Upadhyaya et al. 2011a	Accession	Accession/ genotype
Protein	Finger millet	IE 7386	7.38		Kenya	Upadhyaya et al. 2011a	Accession	Accession/ genotype
Protein	Finger millet	IE 7407	7.52		Kenya	Upadhyaya et al. 2011a	Accession	Accession/ genotype
Protein	Finger millet	IE 7508	8.45		Ethiopia	Upadhyaya et al. 2011a	Accession	Accession/ genotype
Protein	Finger millet	Sri Chaitanya	7.3		India	Udamala et al. 2020	Line/ Genotype	Accession/ genotype
Protein	Finger millet	Bharathi	7.3		India	Udamala et al. 2020	Line/ Genotype	Accession/ genotype
Protein	Finger millet	Champavathi	5.8		India	Udamala et al. 2020	Line/ Genotype	Accession/ genotype
Protein	Finger millet	Vegavathi	3.3		India	Udamala et al. 2020	Line/ Genotype	Accession/ genotype
Protein	Finger millet	VR 1101	6.2		India	Udamala et al. 2020	Line/ Genotype	Accession/ genotype
Protein	Finger millet	VR 1110	7.5		India	Udamala et al. 2020	Line/ Genotype	Accession/ genotype
Protein	Finger millet	VR 1151	5.9		India	Udamala et al. 2020	Line/ Genotype	Accession/ genotype
Protein	Finger millet	VR 1131	6.2		India	Udamala et al. 2020	Line/ Genotype	Accession/ genotype
Protein	Finger millet	VR 1125	5.3		India	Udamala et al. 2020	Line/ Genotype	Accession/ genotype
Protein	Finger millet	VR 1112	7.2		India	Udamala et al. 2020	Line/ Genotype	Accession/ genotype
Protein	Finger millet	VR 1117	5.1		India	Udamala et al. 2020	Line/ Genotype	Accession/ genotype
Protein	Finger millet	VL 352	6.3		India	Udamala et al. 2020	Line/ Genotype	Accession/ genotype
Protein	Finger millet	GPU 67	4.8		India	Udamala et al. 2020	Line/ Genotype	Accession/ genotype
Protein	Finger millet	PR 202	6.7		India	Udamala et al. 2020	Line/ Genotype	Accession/ genotype
Protein	Finger millet	Vakula	5.5		India	Udamala et al. 2020	Line/ Genotype	Accession/ genotype
Protein	Finger millet	EG 4	4.9		India	Udamala et al. 2020	Line/ Genotype	Accession/ genotype
Protein	Finger millet	EG 16	5.7		India	Udamala et al. 2020	Line/ Genotype	Accession/ genotype
Protein	Finger millet	EG 17	5.2		India	Udamala et al. 2020	Line/ Genotype	Accession/ genotype
Protein	Finger millet	EG 18	6.5		India	Udamala et al. 2020	Line/ Genotype	Accession/ genotype
Protein	Finger millet	EG 21	7.4		India	Udamala et al. 2020	Line/ Genotype	Accession/ genotype
Protein	Finger millet	EG 24	5.7		India	Udamala et al. 2020	Line/ Genotype	Accession/ genotype
Protein	Finger millet	EG 31	5.5		India	Udamala et al. 2020	Line/ Genotype	Accession/ genotype
Protein	Finger millet	VR 1179	9.2		India	Udamala et al. 2020	Line/ Genotype	Accession/ genotype
Protein	Finger millet	VR 1174	5.5		India	Udamala et al. 2020	Line/ Genotype	Accession/ genotype
Protein	Finger millet	EG 48	6.2		India	Udamala et al. 2020	Line/ Genotype	Accession/ genotype
Protein	Finger millet	VR 1171	7		India	Udamala et al. 2020	Line/ Genotype	Accession/ genotype
Protein	Finger millet	VR1165	2.6		India	Udamala et al. 2020	Line/ Genotype	Accession/ genotype
Protein	Finger millet	VR1163	4.4		India	Udamala et al. 2020	Line/ Genotype	Accession/ genotype
Protein	Finger millet	GPU 45	6.6		India	Udamala et al. 2020	Line/ Genotype	Accession/ genotype
Protein	Finger millet	VL 376	4.5		India	Udamala et al. 2020	Line/ Genotype	Accession/ genotype
Protein	Finger millet	Malawi 1305	10.94		Malawi	Sankaravadivoo et al. 1998	Genotype	Accession/ genotype	selected on the basis of Ca & Protein
Protein	Finger millet	Malawi 1314	10.07		Malawi	Sankaravadivoo et al. 1998	Genotype	Accession/ genotype	selected on the basis of Ca & Protein
Protein	Finger millet	Malawi 1826	8.32		Malawi	Sankaravadivoo et al. 1998	Genotype	Accession/ genotype	selected on the basis of Ca & Protein
Protein	Finger millet	Malawi 1861	10.1		Malawi	Sankaravadivoo et al. 1998	Genotype	Accession/ genotype	selected on the basis of Ca & Protein
Protein	Finger millet	Malawi 1866	9.47		Malawi	Sankaravadivoo et al. 1998	Genotype	Accession/ genotype	selected on the basis of Ca & Protein
Protein	Finger millet	Malawi 1895	7.17		Malawi	Sankaravadivoo et al. 1998	Genotype	Accession/ genotype	selected on the basis of Ca & Protein
Protein	Finger millet	Malawi 1907	10.03		Malawi	Sankaravadivoo et al. 1998	Genotype	Accession/ genotype	selected on the basis of Ca & Protein
Protein	Finger millet	Malawi 1915	8.38		Malawi	Sankaravadivoo et al. 1998	Genotype	Accession/ genotype	selected on the basis of Ca & Protein
Protein	Finger millet	Malawi 1940	7.39		Malawi	Sankaravadivoo et al. 1998	Genotype	Accession/ genotype	selected on the basis of Ca & Protein
Protein	Finger millet	Malawi 1952	7.34		Malawi	Sankaravadivoo et al. 1998	Genotype	Accession/ genotype	selected on the basis of Ca & Protein
Protein	Finger millet	Malawi 1958	9.98		Malawi	Sankaravadivoo et al. 1998	Genotype	Accession/ genotype	selected on the basis of Ca & Protein
Protein	Finger millet	Malawi 2049	11.69		Malawi	Sankaravadivoo et al. 1998	Genotype	Accession/ genotype	selected on the basis of Ca & Protein
Protein	Finger millet	MS 174	10.46			Sankaravadivoo et al. 1998	Genotype	Accession/ genotype	selected on the basis of Ca & Protein
Protein	Finger millet	MS 887	10.14			Sankaravadivoo et al. 1998	Genotype	Accession/ genotype	selected on the basis of Ca & Protein
Protein	Finger millet	MS 1168	11.55			Sankaravadivoo et al. 1998	Genotype	Accession/ genotype	selected on the basis of Ca & Protein
Protein	Finger millet	MS 2777	10.45			Sankaravadivoo et al. 1998	Genotype	Accession/ genotype	selected on the basis of Ca & Protein
Protein	Finger millet	MS 2784	11.95			Sankaravadivoo et al. 1998	Genotype	Accession/ genotype	selected on the basis of Ca & Protein
Protein	Finger millet	MS 2869	10.85			Sankaravadivoo et al. 1998	Genotype	Accession/ genotype	selected on the basis of Ca & Protein
Protein	Finger millet	GE 37	10.59			Sankaravadivoo et al. 1998	Genotype	Accession/ genotype	selected on the basis of Ca & Protein
Protein	Finger millet	GE 60	9.99			Sankaravadivoo et al. 1998	Genotype	Accession/ genotype	selected on the basis of Ca & Protein
Protein	Finger millet	GE 705	9.91			Sankaravadivoo et al. 1998	Genotype	Accession/ genotype	selected on the basis of Ca & Protein
Protein	Finger millet	GE 1106	10.12			Sankaravadivoo et al. 1998	Genotype	Accession/ genotype	selected on the basis of Ca & Protein
Protein	Finger millet	GE 2491	10.55			Sankaravadivoo et al. 1998	Genotype	Accession/ genotype	selected on the basis of Ca & Protein
Protein	Finger millet	GE 2500	12.34			Sankaravadivoo et al. 1998	Genotype	Accession/ genotype	selected on the basis of Ca & Protein
Protein	Finger millet	GE 2535	9.62			Sankaravadivoo et al. 1998	Genotype	Accession/ genotype	selected on the basis of Ca & Protein
Protein	Finger millet	GE 2358	9.05			Sankaravadivoo et al. 1998	Genotype	Accession/ genotype	selected on the basis of Ca & Protein
Protein	Finger millet	IE 3156	11.92			Sankaravadivoo et al. 1998	Genotype	Accession/ genotype	selected on the basis of Ca & Protein
Protein	Finger millet	IE 3184	10.76			Sankaravadivoo et al. 1998	Genotype	Accession/ genotype	selected on the basis of Ca & Protein
Protein	Finger millet	IE 3799	6.68			Sankaravadivoo et al. 1998	Genotype	Accession/ genotype	selected on the basis of Ca & Protein
Protein	Finger millet	IE 3802	7.1			Sankaravadivoo et al. 1998	Genotype	Accession/ genotype	selected on the basis of Ca & Protein
Protein	Finger millet	IE 4117	7.2			Sankaravadivoo et al. 1998	Genotype	Accession/ genotype	selected on the basis of Ca & Protein
Protein	Finger millet	CO 7	10.45			Sankaravadivoo et al. 1998	Genotype	Accession/ genotype	selected on the basis of Ca & Protein
Protein	Finger millet	CO 9	10.94			Sankaravadivoo et al. 1998	Genotype	Accession/ genotype	selected on the basis of Ca & Protein
Protein	Finger millet	CO 11	7.4			Sankaravadivoo et al. 1998	Genotype	Accession/ genotype	selected on the basis of Ca & Protein
Protein	Finger millet	CO 12	8.26			Sankaravadivoo et al. 1998	Genotype	Accession/ genotype	selected on the basis of Ca & Protein
Protein	Finger millet	CO 13	8.9			Sankaravadivoo et al. 1998	Genotype	Accession/ genotype	selected on the basis of Ca & Protein
Protein	Finger millet	Boneya	10.5		Ethiopia	Adamassu et al. 2009	Improved variety	variety
Protein	Finger millet	Padet-1	9.86		Ethiopia	Adamassu et al. 2009	Improved variety	variety
Protein	Finger millet	PBL-1	6.26		Ethiopia	Adamassu et al. 2009	variety	variety
Protein	Finger millet	PBL-2	6.71		Ethiopia	Adamassu et al. 2009	variety	variety
Protein	Finger millet	PBL-3	6.64		Ethiopia	Adamassu et al. 2009	variety	variety
Protein	Finger millet	PBR-1	6.7		Ethiopia	Adamassu et al. 2009	variety	variety
Protein	Finger millet	PBR-2	6.8		Ethiopia	Adamassu et al. 2009	variety	variety
Protein	Finger millet	PBR-3	6.36		Ethiopia	Adamassu et al. 2009	variety	variety
Protein	Finger millet	Tadesse	7.61		Ethiopia	Adamassu et al. 2009	Improved variety	variety
Protein	Finger millet	GN 1	8		India	Nakarani et al. 2020	Genotype	Accession/ genotype
Protein	Finger millet	GN 2	7.3		India	Nakarani et al. 2020	Genotype	Accession/ genotype
Protein	Finger millet	GN 3	7.4		India	Nakarani et al. 2020	Genotype	Accession/ genotype
Protein	Finger millet	GN 4	7.9		India	Nakarani et al. 2020	Genotype	Accession/ genotype
Protein	Finger millet	GN 5	6.7		India	Nakarani et al. 2020	Genotype	Accession/ genotype
Protein	Finger millet	GNN 6	6.9		India	Nakarani et al. 2020	Genotype	Accession/ genotype
Protein	Finger millet	GNN 7	7.4		India	Nakarani et al. 2020	Genotype	Accession/ genotype
Protein	Finger millet	WN 585	7.2		India	Nakarani et al. 2020	Genotype	Accession/ genotype
Protein	Finger millet	WN 548	6.8		India	Nakarani et al. 2020	Genotype	Accession/ genotype
Protein	Finger millet	WN 550	7.6		India	Nakarani et al. 2020	Genotype	Accession/ genotype
Protein	Finger millet	IE2312	6.77		India	Nirgude et al. 2014	Genotype	Accession/ genotype
Protein	Finger millet	IE3945	7.26		Uganda	Nirgude et al. 2014	Genotype	Accession/ genotype
Protein	Finger millet	IE4671	6.95		India	Nirgude et al. 2014	Genotype	Accession/ genotype
Protein	Finger millet	IE5870	7.67		Nepal	Nirgude et al. 2014	Genotype	Accession/ genotype
Protein	Finger millet	IE2296	6.25		India	Nirgude et al. 2014	Genotype	Accession/ genotype
Protein	Finger millet	IE6294	8.05		Zimbabwe	Nirgude et al. 2014	Genotype	Accession/ genotype
Protein	Finger millet	IE5201	7.36		India	Nirgude et al. 2014	Genotype	Accession/ genotype
Protein	Finger millet	IE6326	7.71		Zimbabwe	Nirgude et al. 2014	Genotype	Accession/ genotype
Protein	Finger millet	IE3721	7.11		Uganda	Nirgude et al. 2014	Genotype	Accession/ genotype
Protein	Finger millet	IE2457	6.85		Kenya	Nirgude et al. 2014	Genotype	Accession/ genotype
Protein	Finger millet	IE6337	7.5		Zimbabwe	Nirgude et al. 2014	Genotype	Accession/ genotype
Protein	Finger millet	IE2043	6.87		India	Nirgude et al. 2014	Genotype	Accession/ genotype
Protein	Finger millet	IE5537	7.4		Nepal	Nirgude et al. 2014	Genotype	Accession/ genotype
Protein	Finger millet	VR708	7.91		Unknown	Nirgude et al. 2014	Genotype	Accession/ genotype
Protein	Finger millet	IE4570	7.08		Zimbabwe	Nirgude et al. 2014	Genotype	Accession/ genotype
Protein	Finger millet	IE518	7.64		India	Nirgude et al. 2014	Genotype	Accession/ genotype
Protein	Finger millet	IE3391	7.31		Zimbabwe	Nirgude et al. 2014	Genotype	Accession/ genotype
Protein	Finger millet	IE3317	7.1		Zimbabwe	Nirgude et al. 2014	Genotype	Accession/ genotype
Protein	Finger millet	IE2034	7.34		India	Nirgude et al. 2014	Genotype	Accession/ genotype
Protein	Finger millet	IE2589	7.04		USA	Nirgude et al. 2014	Genotype	Accession/ genotype
Protein	Finger millet	IE3470	7.44		India	Nirgude et al. 2014	Genotype	Accession/ genotype
Protein	Finger millet	IE3475	7.21		India	Nirgude et al. 2014	Genotype	Accession/ genotype
Protein	Finger millet	IE3614	7.62		Unknown	Nirgude et al. 2014	Genotype	Accession/ genotype
Protein	Finger millet	IE4057	7.53		Uganda	Nirgude et al. 2014	Genotype	Accession/ genotype
Protein	Finger millet	IE7079	6.92		Kenya	Nirgude et al. 2014	Genotype	Accession/ genotype
Protein	Finger millet	IE2957	7.72		Germany	Nirgude et al. 2014	Genotype	Accession/ genotype
Protein	Finger millet	IE6473	7.32		Uganda	Nirgude et al. 2014	Genotype	Accession/ genotype
Protein	Finger millet	IE7018	6.48		Kenya	Nirgude et al. 2014	Genotype	Accession/ genotype
Protein	Finger millet	IE3045	9.96		India	Nirgude et al. 2014	Genotype	Accession/ genotype
Protein	Finger millet	IE6350	7.33		Zimbabwe	Nirgude et al. 2014	Genotype	Accession/ genotype
Protein	Finger millet	IE2790	7.91		Malawi	Nirgude et al. 2014	Genotype	Accession/ genotype
Protein	Finger millet	IE4797	7.35		Maldives	Nirgude et al. 2014	Genotype	Accession/ genotype
Protein	Finger millet	IE3077	7.92		India	Nirgude et al. 2014	Genotype	Accession/ genotype
Protein	Finger millet	IE4121	7.31		Uganda	Nirgude et al. 2014	Genotype	Accession/ genotype
Protein	Finger millet	IE4073	6.87		Uganda	Nirgude et al. 2014	Genotype	Accession/ genotype
Protein	Finger millet	IE2710	8.18		Malawi	Nirgude et al. 2014	Genotype	Accession/ genotype
Protein	Finger millet	IE2872	7		Zambia	Nirgude et al. 2014	Genotype	Accession/ genotype
Protein	Finger millet	IE5066	7.43		Senegal	Nirgude et al. 2014	Genotype	Accession/ genotype
Protein	Finger millet	IE7320	7.67		Kenya	Nirgude et al. 2014	Genotype	Accession/ genotype
Protein	Finger millet	IE4491	8.01		Zimbabwe	Nirgude et al. 2014	Genotype	Accession/ genotype
Protein	Finger millet	IE2606	7.08		Malawi	Nirgude et al. 2014	Genotype	Accession/ genotype
Protein	Finger millet	IE2572	7.69		Kenya	Nirgude et al. 2014	Genotype	Accession/ genotype
Protein	Finger millet	IE2619	7.58		Malawi	Nirgude et al. 2014	Genotype	Accession/ genotype
Protein	Finger millet	IE2911	7.31		Zambia	Nirgude et al. 2014	Genotype	Accession/ genotype
Protein	Finger millet	IE501	7.47		India	Nirgude et al. 2014	Genotype	Accession/ genotype
Protein	Finger millet	IE2437	6.58		Kenya	Nirgude et al. 2014	Genotype	Accession/ genotype
Protein	Finger millet	IE6082	7.69		Nepal	Nirgude et al. 2014	Genotype	Accession/ genotype
Protein	Finger millet	IE6154	7.28		Nepal	Nirgude et al. 2014	Genotype	Accession/ genotype
Protein	Finger millet	IE3618	7.27		India	Nirgude et al. 2014	Genotype	Accession/ genotype
Protein	Finger millet	IE4757	7.4		India	Nirgude et al. 2014	Genotype	Accession/ genotype
Protein	Finger millet	IE6514	7.29		Zimbabwe	Nirgude et al. 2014	Genotype	Accession/ genotype
Protein	Finger millet	IE2042	7.52		India	Nirgude et al. 2014	Genotype	Accession/ genotype
Protein	Finger millet	IE5817	7.9		Nepal	Nirgude et al. 2014	Genotype	Accession/ genotype
Protein	Finger millet	IE1055	7.22		Unknown	Nirgude et al. 2014	Genotype	Accession/ genotype
Protein	Finger millet	IE5091	6.97		Zimbabwe	Nirgude et al. 2014	Genotype	Accession/ genotype
Protein	Finger millet	IE3973	6.8		Uganda	Nirgude et al. 2014	Genotype	Accession/ genotype
Protein	Finger millet	IE2217	6.92		India	Nirgude et al. 2014	Genotype	Accession/ genotype
Protein	Finger millet	IE3952	7.06		Uganda	Nirgude et al. 2014	Genotype	Accession/ genotype
Protein	Finger millet	IE2430	7.31		Kenya	Nirgude et al. 2014	Genotype	Accession/ genotype
Protein	Finger millet	IE4734	8.01		India	Nirgude et al. 2014	Genotype	Accession/ genotype
Protein	Finger millet	IE4028	7.36		Uganda	Nirgude et al. 2014	Genotype	Accession/ genotype
Protein	Finger millet	IE6165	7		Nepal	Nirgude et al. 2014	Genotype	Accession/ genotype
Protein	Finger millet	IE6221	7.55		Nepal	Nirgude et al. 2014	Genotype	Accession/ genotype
Protein	Finger millet	IE4709	9.95		Burundi	Nirgude et al. 2014	Genotype	Accession/ genotype
Protein	Finger millet	IE6240	7.13		Zimbabwe	Nirgude et al. 2014	Genotype	Accession/ genotype
Protein	Finger millet	IE6421	7.29		Uganda	Nirgude et al. 2014	Genotype	Accession/ genotype
Protein	Finger millet	IE4497	6.98		Zimbabwe	Nirgude et al. 2014	Genotype	Accession/ genotype
Protein	Finger millet	IE4816	7.49		India	Nirgude et al. 2014	Genotype	Accession/ genotype
Protein	Finger millet	IE5306	7.47		Zimbabwe	Nirgude et al. 2014	Genotype	Accession/ genotype
Protein	Finger millet	IE2871	7.22		Zambia	Nirgude et al. 2014	Genotype	Accession/ genotype
Protein	Finger millet	IE3392	6.54		Zimbabwe	Nirgude et al. 2014	Genotype	Accession/ genotype
Protein	Finger millet	IE4646	7.25		Zimbabwe	Nirgude et al. 2014	Genotype	Accession/ genotype
Protein	Finger millet	IE5106	7.5		Zimbabwe	Nirgude et al. 2014	Genotype	Accession/ genotype
Protein	Finger millet	IE3104	7.87		India	Nirgude et al. 2014	Genotype	Accession/ genotype
Protein	Finger millet	IE6537	11.09		Nigeria	Nirgude et al. 2014	Genotype	Accession/ genotype
Protein	Finger millet	IE5367	6.92		Kenya	Nirgude et al. 2014	Genotype	Accession/ genotype
Protein	Finger millet	IE6059	7.21		Nepal	Nirgude et al. 2014	Genotype	Accession/ genotype
Protein	Finger millet	IE2821	7.32		Nepal	Nirgude et al. 2014	Genotype	Accession/ genotype
Protein	Finger millet	IE4329	7.59		Zimbabwe	Nirgude et al. 2014	Genotype	Accession/ genotype
Protein	Finger millet	IE4673	6.81		India	Nirgude et al. 2014	Genotype	Accession/ genotype
Protein	Finger millet	IE4565	7.95		Zimbabwe	Nirgude et al. 2014	Genotype	Accession/ genotype
Protein	Finger millet	IE4795	7.43		Zimbabwe	Nirgude et al. 2014	Genotype	Accession/ genotype
Protein	Finger millet	IE4622	7.42		Zimbabwe	Nirgude et al. 2014	Genotype	Accession/ genotype
Protein	Finger millet	IE4545	7.4		Zimbabwe	Nirgude et al. 2014	Genotype	Accession/ genotype
Protein	Finger millet	GPHCPB1	14		India	Nirgude et al. 2014	Genotype	Accession/ genotype
Protein	Finger millet	GPHCPB2	11.5		India	Nirgude et al. 2014	Genotype	Accession/ genotype
Protein	Finger millet	GPHCPB13	10.83		India	Nirgude et al. 2014	Genotype	Accession/ genotype
Protein	Finger millet	GPHCPB27	11.3		India	Nirgude et al. 2014	Genotype	Accession/ genotype
Protein	Finger millet	GPHCPB50	11.3		India	Nirgude et al. 2014	Genotype	Accession/ genotype
Protein	Finger millet	GPHCPB10	11.2		India	Nirgude et al. 2014	Genotype	Accession/ genotype
Protein	Finger millet	GPHCPB28	10.9		India	Nirgude et al. 2014	Genotype	Accession/ genotype
Protein	Finger millet	GPHCPB4	11		India	Nirgude et al. 2014	Genotype	Accession/ genotype
Protein	Finger millet	GPHCPB9	10.3		India	Nirgude et al. 2014	Genotype	Accession/ genotype
Protein	Finger millet	GPHCPB16	10		India	Nirgude et al. 2014	Genotype	Accession/ genotype
Protein	Finger millet	GPHCPB26	10.6		India	Nirgude et al. 2014	Genotype	Accession/ genotype
Protein	Finger millet	GPHCPB31	11.3		India	Nirgude et al. 2014	Genotype	Accession/ genotype
Protein	Finger millet	GPHCPB35	11.3		India	Nirgude et al. 2014	Genotype	Accession/ genotype
Protein	Finger millet	GPHCPB37	10.9		India	Nirgude et al. 2014	Genotype	Accession/ genotype
Protein	Finger millet	GPHCPB40	11.8		India	Nirgude et al. 2014	Genotype	Accession/ genotype
Protein	Finger millet	GPHCPB44	10.7		India	Nirgude et al. 2014	Genotype	Accession/ genotype
Protein	Finger millet	GE1680	13.95		India	Nirgude et al. 2014	Genotype	Accession/ genotype
Protein	Finger millet	GE3885	13.76		India	Nirgude et al. 2014	Genotype	Accession/ genotype
Protein	Finger millet	GE1583	11.36		India	Nirgude et al. 2014	Genotype	Accession/ genotype
Protein	Finger millet	Ateso	6.4		Machakos	Shiabiro et al. 2014	Genotype	Accession/ genotype
Protein	Finger millet	Gulu-E	6.53		Machakos	Shiabiro et al. 2014	Genotype	Accession/ genotype
Protein	Finger millet	FMV-1	6.9		Machakos	Shiabiro et al. 2014	Genotype	Accession/ genotype
Protein	Finger millet	KNE-479	8.42		Machakos	Shiabiro et al. 2014	Genotype	Accession/ genotype
Protein	Finger millet	KNE-1034	7.4		Machakos	Shiabiro et al. 2014	Genotype	Accession/ genotype
Protein	Finger millet	Nyaikuro	7.54		Machakos	Shiabiro et al. 2014	Genotype	Accession/ genotype
Protein	Finger millet	GBK 44669	12.37		Kenya	Oteino et al. 2021	variety	variety
Protein	Finger millet	GBK 44672	13.33		Kenya	Oteino et al. 2021	variety	variety
Protein	Finger millet	GBK 44626	14.37		Kenya	Oteino et al. 2021	variety	variety
Protein	Finger millet	GBK004251	9.34		Kenya	Oteino et al. 2021	variety	variety
Protein	Finger millet	GBK 51843	11.12		Tanzania	Oteino et al. 2021	variety	variety
Protein	Finger millet	GBK 51759	13.21		Tanzania	Oteino et al. 2021	variety	variety
Protein	Finger millet	GBK 051855	11.55		Tanzania	Oteino et al. 2021	variety	variety
Protein	Finger millet	GBK 51737	12.89		Uganda	Oteino et al. 2021	variety	variety
Protein	Finger millet	GBK051746	16.87		Uganda	Oteino et al. 2021	variety	variety
Protein	Finger millet	GBK051744	15.01		Uganda	Oteino et al. 2021	variety	variety
Protein	Finger millet	GBK043052	10.32		Kenya	Oteino et al. 2021	variety	variety
Protein	Finger millet	GBK043180	6.25		Kenya	Oteino et al. 2021	variety	variety
Protein	Finger millet	GBK043275	9.44		Kenya	Oteino et al. 2021	variety	variety
Protein	Finger millet	GBK51717	11.03		Uganda	Oteino et al. 2021	variety	variety
Protein	Finger millet	GBK051721	9.1		Uganda	Oteino et al. 2021	variety	variety
Protein	Finger millet	GBK051718	8.59		Uganda	Oteino et al. 2021	variety	variety
Protein	Finger millet	GBK 051725	9.62		Uganda	Oteino et al. 2021	variety	variety
Protein	Finger millet	GBK51705	11.01		Uganda	Oteino et al. 2021	variety	variety
Protein	Finger millet	CHEPNYALTET	8.22		Kenya	Oteino et al. 2021	variety	variety
Protein	Finger millet	GBK057855	14.05		Uganda	Oteino et al. 2021	variety	variety
Protein	Finger millet	KH2396	11		Ethiopia	Barbeau et al. 1993	Wild cultivars	variety
Protein	Finger millet	KH265	7.5		Kenya	Barbeau et al. 1993	Domesticated cultivars	variety
Protein	Finger millet	KH2333	11.7		Bihar, India	Barbeau et al. 1993	Domesticated cultivars	variety
Protein	Finger millet	KH2301	8.7		Ethiopia	Barbeau et al. 1993	Domesticated cultivars	variety
Protein	Finger millet	KH2388	9		India	Barbeau et al. 1993	Domesticated cultivars	variety
Protein	Finger millet	KH2324	11.1		India	Barbeau et al. 1993	Domesticated cultivars	variety
Protein	Finger millet	KH2339	9.7		India	Barbeau et al. 1993	Domesticated cultivars	variety
Protein	Finger millet	MIRavi	6.92		Srilanka	Kumari et al. 2016	variety	variety
Protein	Finger millet	MIRav	7.61		Srilanka	Kumari et al. 2016	variety	variety
Protein	Finger millet	MIOsh	7.17		Srilanka	Kumari et al. 2016	variety	variety
Protein	Finger millet	MOL	7.05		Srilanka	Kumari et al. 2016	variety	variety
Protein	Finger millet	AML	8.7		Srilanka	Kumari et al. 2016	variety	variety
Protein	Finger millet	HAML	7.59		Srilanka	Kumari et al. 2016	variety	variety
Protein	Finger millet	WAL	9.14		Srilanka	Kumari et al. 2016	variety	variety
Protein	Finger millet	THAL	7.42		Srilanka	Kumari et al. 2016	variety	variety
Protein	Finger millet	ALUOsh	7.54		Srilanka	Kumari et al. 2016	variety	variety
Protein	Finger millet	NIKOsh	7.29		Srilanka	Kumari et al. 2016	variety	variety
Protein	Finger millet	BATRav	8.03		Srilanka	Kumari et al. 2016	variety	variety
Protein	Finger millet	POOLED	7.16		India, FCT	Longvah et al., 2017	Pooled variety	variety
Protein	Finger millet	POOLED	11.3		Malawi, FCT	Van Gran et al 2019	Pooled variety	variety
Protein	Finger millet	POOLED	7.38		Kenya, FCT	Mwai 2018	Pooled variety	variety
Protein	Finger millet	GPU-28	6.8		India	Patil et al. 2019	Genotype	Accession/ genotype
Protein	Finger millet	GPU- 48	7		India	Patil et al. 2019	Genotype	Accession/ genotype
Protein	Finger millet	GPU-67	7.07		India	Patil et al. 2019	Genotype	Accession/ genotype
Protein	Finger millet	VL-149	7		India	Patil et al. 2019	Genotype	Accession/ genotype
Protein	Finger millet	PR-202	7.17		India	Patil et al. 2019	Genotype	Accession/ genotype
Protein	Finger millet	RAU-8	7.07		India	Patil et al. 2019	Genotype	Accession/ genotype
Protein	Finger millet	VR-708	7		India	Patil et al. 2019	Genotype	Accession/ genotype
Protein	Finger millet	KOPN-235	7.17		India	Patil et al. 2019	Genotype	Accession/ genotype
Protein	Finger millet	KMR-204	6.9		India	Patil et al. 2019	Genotype	Accession/ genotype
Protein	Finger millet	L-5	6.8		India	Patil et al. 2019	Genotype	Accession/ genotype
Protein	Finger millet	MR-6	7.1		India	Patil et al. 2019	Genotype	Accession/ genotype
Protein	Finger millet	WN-259	7.2		India	Patil et al. 2019	Genotype	Accession/ genotype
Protein	Finger millet	GPU-45	6.9		India	Patil et al. 2019	Genotype	Accession/ genotype
Protein	Finger millet	GPU-66	7		India	Patil et al. 2019	Genotype	Accession/ genotype
Protein	Finger millet	TNAU 1022	6.97		India	Patil et al. 2019	Genotype	Accession/ genotype
Protein	Finger millet	DM 7	7.1		India	Patil et al. 2019	Genotype	Accession/ genotype
Protein	Finger millet	PPP 2885	6.97		India	Patil et al. 2019	Genotype	Accession/ genotype
Protein	Finger millet	OEB 530	7.1		India	Patil et al. 2019	Genotype	Accession/ genotype
Protein	Finger millet	GE-205	6.97		India	Patil et al. 2019	Genotype	Accession/ genotype
Protein	Finger millet	GE-406	7.07		India	Patil et al. 2019	Genotype	Accession/ genotype
Protein	Finger millet	PES-110	7		India	Patil et al. 2019	Genotype	Accession/ genotype
Protein	Finger millet	MR-1	7.17		India	Patil et al. 2019	Genotype	Accession/ genotype
Protein	Finger millet	GE-942	7.17		India	Patil et al. 2019	Genotype	Accession/ genotype
Protein	Finger millet	WWN-8	6.87		India	Patil et al. 2019	Genotype	Accession/ genotype
Protein	Finger millet	WWN-9	6.9		India	Patil et al. 2019	Genotype	Accession/ genotype
Protein	Finger millet	WWN-10	6.53		India	Patil et al. 2019	Genotype	Accession/ genotype
Protein	Finger millet	WWN-11	7.17		India	Patil et al. 2019	Genotype	Accession/ genotype
Protein	Finger millet	WWN-13	7.17		India	Patil et al. 2019	Genotype	Accession/ genotype
Protein	Finger millet	BR 6	7.07		India	Patil et al. 2019	Genotype	Accession/ genotype
Protein	Finger millet	GPU 80	7.2		India	Patil et al. 2019	Genotype	Accession/ genotype
Protein	Finger millet	GN-1	7.27		India	Patil et al. 2019	Genotype	Accession/ genotype
Protein	Finger millet	GN-2	7.07		India	Patil et al. 2019	Genotype	Accession/ genotype
Protein	Finger millet	GN-3	6.87		India	Patil et al. 2019	Genotype	Accession/ genotype
Protein	Finger millet	GN-4	7.47		India	Patil et al. 2019	Genotype	Accession/ genotype
Protein	Finger millet	GN-5	7.4		India	Patil et al. 2019	Genotype	Accession/ genotype
Protein	Finger millet	GPU-28	7.46		India	Patil et al. 2019	Genotype	Accession/ genotype
Protein	Finger millet	GPU-48	7.4		India	Patil et al. 2019	Genotype	Accession/ genotype
Protein	Finger millet	POOLED	7.3		Nepal, FCT	Govt of Nepal, 2017	Pooled variety	variety
Protein	Finger millet	POOLED	5.8		China, FCT	Ershow et al. 1990	Pooled variety	variety
Protein	Fonio	Finiba/Kassangara	7.7		Mali	Koreissi-Dembe´le´ et al. 2013	variety	variety	landraces
Protein	Fonio	Die`ni	7.4		Mali	Koreissi-Dembe´le´ et al. 2013	variety	variety	landraces
Protein	Fonio	Kassangara	7.9		Mali	Koreissi-Dembe´le´ et al. 2013	variety	variety	landraces
Protein	Fonio	Finiba	8.2		Mali	Koreissi-Dembe´le´ et al. 2013	variety	variety	landraces
Protein	Fonio	Petema	8.8		Mali	Koreissi-Dembe´le´ et al. 2013	variety	variety	landraces
Protein	Fonio	Pe´azo 1	8.9		Mali	Koreissi-Dembe´le´ et al. 2013	variety	variety	landraces
Protein	Fonio	Tioi	8.7		Mali	Koreissi-Dembe´le´ et al. 2013	variety	variety	landraces
Protein	Fonio	Peˆye	9.5		Mali	Koreissi-Dembe´le´ et al. 2013	variety	variety	landraces
Protein	Fonio	Tama	8.8		Mali	Koreissi-Dembe´le´ et al. 2013	variety	variety	landraces
Protein	Fonio	Tamatioi	9.2		Mali	Koreissi-Dembe´le´ et al. 2013	variety	variety	landraces
Protein	Fonio	Tamabe´	8.7		Mali	Koreissi-Dembe´le´ et al. 2013	variety	variety	landraces
Protein	Fonio	Pe´azo 2	8.4		Mali	Koreissi-Dembe´le´ et al. 2013	variety	variety	landraces
Protein	Fonio	Yadema	3.75		Ghana	Clottey et al. 2006	genotype	Accession/ genotype
Protein	Fonio	Nomba	3.75		Ghana	Clottey et al. 2006	genotype	Accession/ genotype
Protein	Fonio	HR 3	6.38		Ghana	Clottey et al. 2006	genotype	Accession/ genotype
Protein	Fonio	HR 4	7		Ghana	Clottey et al. 2006	genotype	Accession/ genotype
Protein	Fonio	HR 5	6.5		Ghana	Clottey et al. 2006	genotype	Accession/ genotype
Protein	Fonio	HR 6	7.31		Ghana	Clottey et al. 2006	genotype	Accession/ genotype
Protein	Fonio	HR 7	7.75		Ghana	Clottey et al. 2006	genotype	Accession/ genotype
Protein	Fonio	HR 8	6.69		Ghana	Clottey et al. 2006	genotype	Accession/ genotype
Protein	Fonio	HR 9	5.94		Ghana	Clottey et al. 2006	genotype	Accession/ genotype
Protein	Fonio	HR 10	6.25		Ghana	Clottey et al. 2006	genotype	Accession/ genotype
Protein	Fonio	HR 11	5.88		Ghana	Clottey et al. 2006	genotype	Accession/ genotype
Protein	Fonio	HR 12	7.13		Ghana	Clottey et al. 2006	genotype	Accession/ genotype
Protein	Fonio	HR 13	5.88		Ghana	Clottey et al. 2006	genotype	Accession/ genotype
Protein	Foxtail millet	PALL	9.5		Srilanka	Kumari et al. 2016	variety	variety
Protein	Foxtail millet	HAML	9.93		Srilanka	Kumari et al. 2016	variety	variety
Protein	Foxtail millet	MOL	11.01		Srilanka	Kumari et al. 2016	variety	variety
Protein	Foxtail millet	JAFL	10.23		Srilanka	Kumari et al. 2016	variety	variety
Protein	Foxtail millet	Ise 375	11.3		India	Sharma et al. 2014	accession	Accession/ genotype
Protein	Foxtail millet	Ise 376	11.4		India	Sharma et al. 2014	accession	Accession/ genotype
Protein	Foxtail millet	Ise 748	16.8		India	Sharma et al. 2014	accession	Accession/ genotype
Protein	Foxtail millet	Ise 751	16.1		India	Sharma et al. 2014	accession	Accession/ genotype
Protein	Foxtail millet	Ise 769	12.6		India	Sharma et al. 2014	accession	Accession/ genotype
Protein	Foxtail millet	Ise 771	12.4		India	Sharma et al. 2014	accession	Accession/ genotype
Protein	Foxtail millet	Ise 785	13		India	Sharma et al. 2014	accession	Accession/ genotype
Protein	Foxtail millet	Ise 846	11.9		India	Sharma et al. 2014	accession	Accession/ genotype
Protein	Foxtail millet	Ise 1059	12.9		India	Sharma et al. 2014	accession	Accession/ genotype
Protein	Foxtail millet	Ise 1067	15.7		India	Sharma et al. 2014	accession	Accession/ genotype
Protein	Foxtail millet	Ise 1137	14.4		Syria	Sharma et al. 2014	accession	Accession/ genotype
Protein	Foxtail millet	Ise 1181	14.9		China	Sharma et al. 2014	accession	Accession/ genotype
Protein	Foxtail millet	Ise 1187	13.9		China	Sharma et al. 2014	accession	Accession/ genotype
Protein	Foxtail millet	Ise 1201	13		China	Sharma et al. 2014	accession	Accession/ genotype
Protein	Foxtail millet	Ise 1204	14.3		Russia & CISs	Sharma et al. 2014	accession	Accession/ genotype
Protein	Foxtail millet	Ise 1258	14.4		Russia & CISs	Sharma et al. 2014	accession	Accession/ genotype
Protein	Foxtail millet	Ise 1286	13.5		Turkey	Sharma et al. 2014	accession	Accession/ genotype
Protein	Foxtail millet	Ise 1320	13.7		USA	Sharma et al. 2014	accession	Accession/ genotype
Protein	Foxtail millet	Ise 1335	16.2		Hungary	Sharma et al. 2014	accession	Accession/ genotype
Protein	Foxtail millet	Ise 1387	13.2		Sri Lanka	Sharma et al. 2014	accession	Accession/ genotype
Protein	Foxtail millet	Ise 1419	15.7		India	Sharma et al. 2014	accession	Accession/ genotype
Protein	Foxtail millet	Ise 1541	17.2		India	Sharma et al. 2014	accession	Accession/ genotype
Protein	Foxtail millet	Ise'1547	11.5		Korea	Sharma et al. 2014	accession	Accession/ genotype
Protein	Foxtail millet	Ise 1563	13.9		Korea	Sharma et al. 2014	accession	Accession/ genotype
Protein	Foxtail millet	Ise 1575	12.5		Korea	Sharma et al. 2014	accession	Accession/ genotype
Protein	Foxtail millet	Ise 1593	13.2		Korea	Sharma et al. 2014	accession	Accession/ genotype
Protein	Foxtail millet	Ise 1685	11.9		India	Sharma et al. 2014	accession	Accession/ genotype
Protein	Foxtail millet	Ise 1704	12.6		India	Sharma et al. 2014	accession	Accession/ genotype
Protein	Foxtail millet	Ise 1118	16		Syria	Sharma et al. 2014	accession	Accession/ genotype
Protein	Foxtail millet	GS 12	9.64		India	Thippaswamy et al. 2017	genotype	Accession/ genotype
Protein	Foxtail millet	GS 64	10.13		India	Thippaswamy et al. 2017	genotype	Accession/ genotype
Protein	Foxtail millet	GS 71	9.32		India	Thippaswamy et al. 2017	genotype	Accession/ genotype
Protein	Foxtail millet	GS 78	9.49		India	Thippaswamy et al. 2017	genotype	Accession/ genotype
Protein	Foxtail millet	GS 95	10.89		India	Thippaswamy et al. 2017	genotype	Accession/ genotype
Protein	Foxtail millet	GS 106	8.76		India	Thippaswamy et al. 2017	genotype	Accession/ genotype
Protein	Foxtail millet	GS 121	8.67		India	Thippaswamy et al. 2017	genotype	Accession/ genotype
Protein	Foxtail millet	GS 213	7.92		India	Thippaswamy et al. 2017	genotype	Accession/ genotype
Protein	Foxtail millet	GS 29	8.27		India	Thippaswamy et al. 2017	genotype	Accession/ genotype
Protein	Foxtail millet	GS 221	8.94		India	Thippaswamy et al. 2017	genotype	Accession/ genotype
Protein	Foxtail millet	GS 276	6.2		India	Thippaswamy et al. 2017	genotype	Accession/ genotype
Protein	Foxtail millet	GS 293	8.5		India	Thippaswamy et al. 2017	genotype	Accession/ genotype
Protein	Foxtail millet	GS 310	8.94		India	Thippaswamy et al. 2017	genotype	Accession/ genotype
Protein	Foxtail millet	GS 510	8.35		India	Thippaswamy et al. 2017	genotype	Accession/ genotype
Protein	Foxtail millet	GS 511	7.28		India	Thippaswamy et al. 2017	genotype	Accession/ genotype
Protein	Foxtail millet	SiA 3085	8.32		India	Thippaswamy et al. 2017	genotype	Accession/ genotype
Protein	Foxtail millet	Co 7	8.59		India	Thippaswamy et al. 2017	genotype	Accession/ genotype
Protein	Foxtail millet	SiA 2644	8.38		India	Thippaswamy et al. 2017	genotype	Accession/ genotype
Protein	Foxtail millet	TNAU 186	7.89		India	Thippaswamy et al. 2017	genotype	Accession/ genotype
Protein	Foxtail millet	SR 11	9.05		India	Thippaswamy et al. 2017	genotype	Accession/ genotype
Protein	Foxtail millet	SiA 2593	8.53		India	Thippaswamy et al. 2017	genotype	Accession/ genotype
Protein	Foxtail millet	FMGPM-9	7.45		India	Thippaswamy et al. 2017	genotype	Accession/ genotype
Protein	Foxtail millet	PS 4	8.03		India	Thippaswamy et al. 2017	genotype	Accession/ genotype
Protein	Foxtail millet	HMT-100-1	7.16		India	Thippaswamy et al. 2017	genotype	Accession/ genotype
Protein	Foxtail millet	SiA 326	8.73		India	Thippaswamy et al. 2017	genotype	Accession/ genotype
Protein	Foxtail millet	Ise 1468	14.37		India	Brunda et al. 2017	genotype	Accession/ genotype
Protein	Foxtail millet	GS 1000	14.07		India	Brunda et al. 2017	genotype	Accession/ genotype
Protein	Foxtail millet	Ise – 375	14.04		India	Brunda et al. 2017	genotype	Accession/ genotype
Protein	Foxtail millet	GS 2099	13.96		India	Brunda et al. 2017	genotype	Accession/ genotype
Protein	Foxtail millet	DHF 30	13.96		India	Brunda et al. 2017	genotype	Accession/ genotype
Protein	Foxtail millet	Meera	13.88		India	Brunda et al. 2017	genotype	Accession/ genotype
Protein	Foxtail millet	Ise 140	13.76		India	Brunda et al. 2017	genotype	Accession/ genotype
Protein	Foxtail millet	GS 271	13.71		India	Brunda et al. 2017	genotype	Accession/ genotype
Protein	Foxtail millet	GS 2105	13.7		India	Brunda et al. 2017	genotype	Accession/ genotype
Protein	Foxtail millet	GS 592	13.66		India	Brunda et al. 2017	genotype	Accession/ genotype
Protein	Foxtail millet	HMT-100-1	13.29		India	Brunda et al. 2017	genotype	Accession/ genotype
Protein	Foxtail millet	PS 4	13.38		India	Brunda et al. 2017	genotype	Accession/ genotype
Protein	Foxtail millet	SiA 326	13.53		India	Brunda et al. 2017	genotype	Accession/ genotype
Protein	Foxtail millet	DHF 2	12		India	Brunda et al. 2017	genotype	Accession/ genotype
Protein	Foxtail millet	DHF 13	12.61		India	Brunda et al. 2017	genotype	Accession/ genotype
Protein	Foxtail millet	DHF 5	13.12		India	Brunda et al. 2017	genotype	Accession/ genotype
Protein	Foxtail millet	DHF 18	12.27		India	Brunda et al. 2017	genotype	Accession/ genotype
Protein	Foxtail millet	DHF 1	13		India	Brunda et al. 2017	genotype	Accession/ genotype
Protein	Foxtail millet	DHF 4	11.92		India	Brunda et al. 2017	genotype	Accession/ genotype
Protein	Foxtail millet	DHF 20	12.89		India	Brunda et al. 2017	genotype	Accession/ genotype
Protein	Foxtail millet	DHF 19	12.35		India	Brunda et al. 2017	genotype	Accession/ genotype
Protein	Foxtail millet	DHF 16	12.55		India	Brunda et al. 2017	genotype	Accession/ genotype
Protein	Foxtail millet	DHF 25	9.97		India	Brunda et al. 2017	genotype	Accession/ genotype
Protein	Foxtail millet	RFM-10	11.43		India	Kamatar et al. 2015	genotype	Accession/ genotype	(44 germplasm, 31 lines)
Protein	Foxtail millet	H-1	11.3		India	Kamatar et al. 2015	genotype	Accession/ genotype	(44 germplasm, 31 lines)
Protein	Foxtail millet	H-2	13.31		India	Kamatar et al. 2015	genotype	Accession/ genotype	(44 germplasm, 31 lines)
Protein	Foxtail millet	CO-4	12.81		India	Kamatar et al. 2015	genotype	Accession/ genotype	(44 germplasm, 31 lines)
Protein	Foxtail millet	K-2	10.83		India	Kamatar et al. 2015	genotype	Accession/ genotype	(44 germplasm, 31 lines)
Protein	Foxtail millet	Krishnadevaraya	12.05		India	Kamatar et al. 2015	genotype	Accession/ genotype	(44 germplasm, 31 lines)
Protein	Foxtail millet	Narasimharaya	12.83		India	Kamatar et al. 2015	genotype	Accession/ genotype	(44 germplasm, 31 lines)
Protein	Foxtail millet	Chithra	13.33		India	Kamatar et al. 2015	genotype	Accession/ genotype	(44 germplasm, 31 lines)
Protein	Foxtail millet	Arjuna	12.53		India	Kamatar et al. 2015	genotype	Accession/ genotype	(44 germplasm, 31 lines)
Protein	Foxtail millet	Srilakshmi	12.62		India	Kamatar et al. 2015	genotype	Accession/ genotype	(44 germplasm, 31 lines)
Protein	Foxtail millet	K-222-1	12.78		India	Kamatar et al. 2015	genotype	Accession/ genotype	(44 germplasm, 31 lines)
Protein	Foxtail millet	Sia -3085	12.06		India	Kamatar et al. 2015	genotype	Accession/ genotype	(44 germplasm, 31 lines)
Protein	Foxtail millet	Meera	13.88		India	Kamatar et al. 2015	genotype	Accession/ genotype	(44 germplasm, 31 lines)
Protein	Foxtail millet	Pratapkagni	13.55		India	Kamatar et al. 2015	genotype	Accession/ genotype	(44 germplasm, 31 lines)
Protein	Foxtail millet	Ise 375	14.04		India	Kamatar et al. 2015	genotype	Accession/ genotype	(44 germplasm, 31 lines)
Protein	Foxtail millet	Ise 1312	13.07		India	Kamatar et al. 2015	genotype	Accession/ genotype	(44 germplasm, 31 lines)
Protein	Foxtail millet	Ise 1468	14.37		India	Kamatar et al. 2015	genotype	Accession/ genotype	(44 germplasm, 31 lines)
Protein	Foxtail millet	Ise 1685	13.17		India	Kamatar et al. 2015	genotype	Accession/ genotype	(44 germplasm, 31 lines)
Protein	Foxtail millet	Ise 900	12.78		India	Kamatar et al. 2015	genotype	Accession/ genotype	(44 germplasm, 31 lines)
Protein	Foxtail millet	Ise 140	13.76		India	Kamatar et al. 2015	genotype	Accession/ genotype	(44 germplasm, 31 lines)
Protein	Foxtail millet	Ise 758	13.05		India	Kamatar et al. 2015	genotype	Accession/ genotype	(44 germplasm, 31 lines)
Protein	Foxtail millet	Ise 1647	13.53		India	Kamatar et al. 2015	genotype	Accession/ genotype	(44 germplasm, 31 lines)
Protein	Foxtail millet	Ise 931	13.07		India	Kamatar et al. 2015	genotype	Accession/ genotype	(44 germplasm, 31 lines)
Protein	Foxtail millet	GS 2164	12.96		India	Kamatar et al. 2015	genotype	Accession/ genotype	(44 germplasm, 31 lines)
Protein	Foxtail millet	GS 2040	13.36		India	Kamatar et al. 2015	genotype	Accession/ genotype	(44 germplasm, 31 lines)
Protein	Foxtail millet	GS 515	13.29		India	Kamatar et al. 2015	genotype	Accession/ genotype	(44 germplasm, 31 lines)
Protein	Foxtail millet	GS 949	13.05		India	Kamatar et al. 2015	genotype	Accession/ genotype	(44 germplasm, 31 lines)
Protein	Foxtail millet	GS 592	13.66		India	Kamatar et al. 2015	genotype	Accession/ genotype	(44 germplasm, 31 lines)
Protein	Foxtail millet	GS 511	13.3		India	Kamatar et al. 2015	genotype	Accession/ genotype	(44 germplasm, 31 lines)
Protein	Foxtail millet	GS 90	13.25		India	Kamatar et al. 2015	genotype	Accession/ genotype	(44 germplasm, 31 lines)
Protein	Foxtail millet	GS 121	12.94		India	Kamatar et al. 2015	genotype	Accession/ genotype	(44 germplasm, 31 lines)
Protein	Foxtail millet	GS 271	13.71		India	Kamatar et al. 2015	genotype	Accession/ genotype	(44 germplasm, 31 lines)
Protein	Foxtail millet	GS 740	13.13		India	Kamatar et al. 2015	genotype	Accession/ genotype	(44 germplasm, 31 lines)
Protein	Foxtail millet	GS 1000	14.07		India	Kamatar et al. 2015	genotype	Accession/ genotype	(44 germplasm, 31 lines)
Protein	Foxtail millet	GS 1483	11.46		India	Kamatar et al. 2015	genotype	Accession/ genotype	(44 germplasm, 31 lines)
Protein	Foxtail millet	GS 1560	12.91		India	Kamatar et al. 2015	genotype	Accession/ genotype	(44 germplasm, 31 lines)
Protein	Foxtail millet	GS 2099	13.96		India	Kamatar et al. 2015	genotype	Accession/ genotype	(44 germplasm, 31 lines)
Protein	Foxtail millet	GS 2105	13.7		India	Kamatar et al. 2015	genotype	Accession/ genotype	(44 germplasm, 31 lines)
Protein	Foxtail millet	GS 2109	12.94		India	Kamatar et al. 2015	genotype	Accession/ genotype	(44 germplasm, 31 lines)
Protein	Foxtail millet	GS 2126	11.27		India	Kamatar et al. 2015	genotype	Accession/ genotype	(44 germplasm, 31 lines)
Protein	Foxtail millet	GS 2159	13.62		India	Kamatar et al. 2015	genotype	Accession/ genotype	(44 germplasm, 31 lines)
Protein	Foxtail millet	GS 2192	12.89		India	Kamatar et al. 2015	genotype	Accession/ genotype	(44 germplasm, 31 lines)
Protein	Foxtail millet	GS 2197	12.72		India	Kamatar et al. 2015	genotype	Accession/ genotype	(44 germplasm, 31 lines)
Protein	Foxtail millet	GS 2215	13.3		India	Kamatar et al. 2015	genotype	Accession/ genotype	(44 germplasm, 31 lines)
Protein	Foxtail millet	DHF 21	11.97		India	Kamatar et al. 2015	genotype	Accession/ genotype	(44 germplasm, 31 lines)
Protein	Foxtail millet	DHF 22	10.49		India	Kamatar et al. 2015	genotype	Accession/ genotype	(44 germplasm, 31 lines)
Protein	Foxtail millet	DHF 23	13.47		India	Kamatar et al. 2015	genotype	Accession/ genotype	(44 germplasm, 31 lines)
Protein	Foxtail millet	DHF 24	9.04		India	Kamatar et al. 2015	genotype	Accession/ genotype	(44 germplasm, 31 lines)
Protein	Foxtail millet	DHF 25	9.97		India	Kamatar et al. 2015	genotype	Accession/ genotype	(44 germplasm, 31 lines)
Protein	Foxtail millet	DHF 26	8.98		India	Kamatar et al. 2015	genotype	Accession/ genotype	(44 germplasm, 31 lines)
Protein	Foxtail millet	DHF 27	10.9		India	Kamatar et al. 2015	genotype	Accession/ genotype	(44 germplasm, 31 lines)
Protein	Foxtail millet	DHF 28	11.06		India	Kamatar et al. 2015	genotype	Accession/ genotype	(44 germplasm, 31 lines)
Protein	Foxtail millet	DHF 29	10.86		India	Kamatar et al. 2015	genotype	Accession/ genotype	(44 germplasm, 31 lines)
Protein	Foxtail millet	DHF-30	13.96		India	Kamatar et al. 2015	genotype	Accession/ genotype	(44 germplasm, 31 lines)
Protein	Foxtail millet	ST-13	13.01		India	Kamatar et al. 2015	genotype	Accession/ genotype	(44 germplasm, 31 lines)
Protein	Foxtail millet	DHF 1	13		India	Kamatar et al. 2015	genotype	Accession/ genotype	(44 germplasm, 31 lines)
Protein	Foxtail millet	DHF 2	12.98		India	Kamatar et al. 2015	genotype	Accession/ genotype	(44 germplasm, 31 lines)
Protein	Foxtail millet	DHF 3	13.02		India	Kamatar et al. 2015	genotype	Accession/ genotype	(44 germplasm, 31 lines)
Protein	Foxtail millet	DHF 4	11.92		India	Kamatar et al. 2015	genotype	Accession/ genotype	(44 germplasm, 31 lines)
Protein	Foxtail millet	DHF 5	13.12		India	Kamatar et al. 2015	genotype	Accession/ genotype	(44 germplasm, 31 lines)
Protein	Foxtail millet	DHF 6	11.95		India	Kamatar et al. 2015	genotype	Accession/ genotype	(44 germplasm, 31 lines)
Protein	Foxtail millet	DHF 7	12.65		India	Kamatar et al. 2015	genotype	Accession/ genotype	(44 germplasm, 31 lines)
Protein	Foxtail millet	DHF 8	13.06		India	Kamatar et al. 2015	genotype	Accession/ genotype	(44 germplasm, 31 lines)
Protein	Foxtail millet	DHF 9	12.22		India	Kamatar et al. 2015	genotype	Accession/ genotype	(44 germplasm, 31 lines)
Protein	Foxtail millet	DHF 10	11.47		India	Kamatar et al. 2015	genotype	Accession/ genotype	(44 germplasm, 31 lines)
Protein	Foxtail millet	DHF 11	12.88		India	Kamatar et al. 2015	genotype	Accession/ genotype	(44 germplasm, 31 lines)
Protein	Foxtail millet	DHF 12	12.02		India	Kamatar et al. 2015	genotype	Accession/ genotype	(44 germplasm, 31 lines)
Protein	Foxtail millet	DHF 13	12.61		India	Kamatar et al. 2015	genotype	Accession/ genotype	(44 germplasm, 31 lines)
Protein	Foxtail millet	DHF 14	12.65		India	Kamatar et al. 2015	genotype	Accession/ genotype	(44 germplasm, 31 lines)
Protein	Foxtail millet	DHF 15	12.19		India	Kamatar et al. 2015	genotype	Accession/ genotype	(44 germplasm, 31 lines)
Protein	Foxtail millet	DHF 16	12.55		India	Kamatar et al. 2015	genotype	Accession/ genotype	(44 germplasm, 31 lines)
Protein	Foxtail millet	DHF 17	12.79		India	Kamatar et al. 2015	genotype	Accession/ genotype	(44 germplasm, 31 lines)
Protein	Foxtail millet	DHF 18	12.27		India	Kamatar et al. 2015	genotype	Accession/ genotype	(44 germplasm, 31 lines)
Protein	Foxtail millet	DHF 19	12.35		India	Kamatar et al. 2015	genotype	Accession/ genotype	(44 germplasm, 31 lines)
Protein	Foxtail millet	DHF 20	12.89		India	Kamatar et al. 2015	genotype	Accession/ genotype	(44 germplasm, 31 lines)
Protein	Foxtail millet	Hmt-100-1	13.29		India	Kamatar et al. 2015	genotype	Accession/ genotype	(44 germplasm, 31 lines)
Protein	Foxtail millet	PS-4	12.38		India	Kamatar et al. 2015	genotype	Accession/ genotype	(44 germplasm, 31 lines)
Protein	Foxtail millet	Sia-326	13.53		India	Kamatar et al. 2015	genotype	Accession/ genotype	(44 germplasm, 31 lines)
Protein	Foxtail millet	ISe 364	12.4			Upadhyaya et al. 2011b	accession	Accession/ genotype
Protein	Foxtail millet	ISe 388	12.4			Upadhyaya et al. 2011b	accession	Accession/ genotype
Protein	Foxtail millet	ISe 663	11.9		Switzerland	Upadhyaya et al. 2011b	accession	Accession/ genotype
Protein	Foxtail millet	ISe 710	11.4		India	Upadhyaya et al. 2011b	accession	Accession/ genotype
Protein	Foxtail millet	ISe 748	16.8		India	Upadhyaya et al. 2011b	accession	Accession/ genotype
Protein	Foxtail millet	ISe 846	11.9			Upadhyaya et al. 2011b	accession	Accession/ genotype
Protein	Foxtail millet	ISe 869	13			Upadhyaya et al. 2011b	accession	Accession/ genotype
Protein	Foxtail millet	ISe 969	12.6			Upadhyaya et al. 2011b	accession	Accession/ genotype
Protein	Foxtail millet	ISe 1134	16			Upadhyaya et al. 2011b	accession	Accession/ genotype
Protein	Foxtail millet	ISe 1151	15.9			Upadhyaya et al. 2011b	accession	Accession/ genotype
Protein	Foxtail millet	ISe 1227	17.8			Upadhyaya et al. 2011b	accession	Accession/ genotype
Protein	Foxtail millet	ISe 1254	17.2		Russia	Upadhyaya et al. 2011b	accession	Accession/ genotype
Protein	Foxtail millet	ISe 1305	16.7		Spain	Upadhyaya et al. 2011b	accession	Accession/ genotype
Protein	Foxtail millet	ISe 1312	18.5			Upadhyaya et al. 2011b	accession	Accession/ genotype
Protein	Foxtail millet	ISe 1419	15.7			Upadhyaya et al. 2011b	accession	Accession/ genotype
Protein	Foxtail millet	ISe 1458	13.1			Upadhyaya et al. 2011b	accession	Accession/ genotype
Protein	Foxtail millet	ISe 1581	12.5			Upadhyaya et al. 2011b	accession	Accession/ genotype
Protein	Foxtail millet	ISe 1610	11.5		Malawi	Upadhyaya et al. 2011b	accession	Accession/ genotype
Protein	Foxtail millet	ISe 1704	12.6			Upadhyaya et al. 2011b	accession	Accession/ genotype
Protein	Foxtail millet	ISe 1767	12.8			Upadhyaya et al. 2011b	accession	Accession/ genotype
Protein	Foxtail millet	ISe 1773	13.2			Upadhyaya et al. 2011b	accession	Accession/ genotype
Protein	Foxtail millet	ISe 1789	17.7			Upadhyaya et al. 2011b	accession	Accession/ genotype
Protein	Foxtail millet	ISe 1808	13.3			Upadhyaya et al. 2011b	accession	Accession/ genotype
Protein	Foxtail millet	ISe 1820	13.1		India	Upadhyaya et al. 2011b	accession	Accession/ genotype
Protein	Foxtail millet	ISe 1846	12.5			Upadhyaya et al. 2011b	accession	Accession/ genotype
Protein	Foxtail millet	ISe 1888	11.7		Ethiopia	Upadhyaya et al. 2011b	accession	Accession/ genotype
Protein	Foxtail millet	ISe 375	11.3		India	Upadhyaya et al. 2011b	accession	Accession/ genotype
Protein	Foxtail millet	ISe 376	11.4			Upadhyaya et al. 2011b	accession	Accession/ genotype
Protein	Foxtail millet	ISe 1468	13.4			Upadhyaya et al. 2011b	accession	Accession/ genotype
Protein	Foxtail millet	ISe 1541	17.2			Upadhyaya et al. 2011b	accession	Accession/ genotype
Protein	Foxtail millet	POOLED	12.3		Nepal, FCT	Govt of Nepal, 2017	Pooled variety	variety
Protein	Foxtail millet	POOLED	9.7		China, FCT	Ershow et al. 1990	Pooled variety	variety
Protein	Job's tears	Ngum	12.66		India	Luithui and Meera 2018	variety	variety
Protein	Job's tears	PTA-1	13.82		Indonesia	Ramadhan et al 2023	accession	Accession/ genotype
Protein	Job's tears	KKD-3	10.53		Indonesia	Ramadhan et al 2024	accession	Accession/ genotype
Protein	Job's tears	PH-4	12.33		Indonesia	Ramadhan et al 2025	accession	Accession/ genotype
Protein	Job's tears	BTA-2	13.82		Indonesia	Ramadhan et al 2026	accession	Accession/ genotype
Protein	Job's tears	GT-2	13.79		Indonesia	Ramadhan et al 2027	accession	Accession/ genotype
Protein	Job's tears	TJR-2	13.73		Indonesia	Ramadhan et al 2028	accession	Accession/ genotype
Protein	Kodo millet	IPs 729	7.75		India	Vetriventhan and Upadhyaya 2019	accession	Accession/ genotype
Protein	Kodo millet	IPs 222	8.05		India	Vetriventhan and Upadhyaya 2019	accession	Accession/ genotype
Protein	Kodo millet	IPs 860	9.1		India	Vetriventhan and Upadhyaya 2019	accession	Accession/ genotype
Protein	Kodo millet	IPs 670	7.45		India	Vetriventhan and Upadhyaya 2019	accession	Accession/ genotype
Protein	Kodo millet	IPs 77	7.75		India	Vetriventhan and Upadhyaya 2019	accession	Accession/ genotype
Protein	Kodo millet	IPs 710	8.2		India	Vetriventhan and Upadhyaya 2019	accession	Accession/ genotype
Protein	Kodo millet	IPs 158	8.65		India	Vetriventhan and Upadhyaya 2019	accession	Accession/ genotype
Protein	Kodo millet	IPs 585	8.25		India	Vetriventhan and Upadhyaya 2019	accession	Accession/ genotype
Protein	Kodo millet	IPs 13	7.25		India	Vetriventhan and Upadhyaya 2019	accession	Accession/ genotype
Protein	Kodo millet	IPs 669	7.4		India	Vetriventhan and Upadhyaya 2019	accession	Accession/ genotype
Protein	Kodo millet	IPs 279	8.05		India	Vetriventhan and Upadhyaya 2019	accession	Accession/ genotype
Protein	Kodo millet	IPs 588	7.95		India	Vetriventhan and Upadhyaya 2019	accession	Accession/ genotype
Protein	Kodo millet	IPs 593	7.6		India	Vetriventhan and Upadhyaya 2019	accession	Accession/ genotype
Protein	Kodo millet	IPs 686	7.75		India	Vetriventhan and Upadhyaya 2019	accession	Accession/ genotype
Protein	Kodo millet	IPs 280	7.75		India	Vetriventhan and Upadhyaya 2019	accession	Accession/ genotype
Protein	Kodo millet	IPs 689	9.3		India	Vetriventhan and Upadhyaya 2019	accession	Accession/ genotype
Protein	Kodo millet	IPs 4	8.35		India	Vetriventhan and Upadhyaya 2019	accession	Accession/ genotype
Protein	Kodo millet	IPs 274	7.85		India	Vetriventhan and Upadhyaya 2019	accession	Accession/ genotype
Protein	Kodo millet	IPs 264	9.15		India	Vetriventhan and Upadhyaya 2019	accession	Accession/ genotype
Protein	Kodo millet	IPs 614	8.6		India	Vetriventhan and Upadhyaya 2019	accession	Accession/ genotype
Protein	Kodo millet	IPs 881	7.65		India	Vetriventhan and Upadhyaya 2019	accession	Accession/ genotype
Protein	Kodo millet	IPs 5	7.45		India	Vetriventhan and Upadhyaya 2019	accession	Accession/ genotype
Protein	Kodo millet	IPs 575	8		India	Vetriventhan and Upadhyaya 2019	accession	Accession/ genotype
Protein	Kodo millet	IPs 86	8.1		India	Vetriventhan and Upadhyaya 2019	accession	Accession/ genotype
Protein	Kodo millet	IPs 9	8.1		India	Vetriventhan and Upadhyaya 2019	accession	Accession/ genotype
Protein	Kodo millet	IPs 83	7.7		India	Vetriventhan and Upadhyaya 2019	accession	Accession/ genotype
Protein	Kodo millet	IPs 814	7.25		India	Vetriventhan and Upadhyaya 2019	accession	Accession/ genotype
Protein	Kodo millet	IPs 339	7.95		India	Vetriventhan and Upadhyaya 2019	accession	Accession/ genotype
Protein	Kodo millet	IPs 287	7		India	Vetriventhan and Upadhyaya 2019	accession	Accession/ genotype
Protein	Kodo millet	IPs 699	8.6		India	Vetriventhan and Upadhyaya 2019	accession	Accession/ genotype
Protein	Kodo Millet	POOLED	8.92		India, FCT	Longvah et al., 2017	Pooled variety	variety
Protein	Little millet	IPmr 855	9.9		India	Vetriventhan et al. 2021	accession	Accession/ genotype
Protein	Little millet	IPmr 974	12.2		India	Vetriventhan et al. 2021	accession	Accession/ genotype
Protein	Little millet	IPmr 877	9.6		India	Vetriventhan et al. 2021	accession	Accession/ genotype
Protein	Little millet	IPmr 897	9.4		India	Vetriventhan et al. 2021	accession	Accession/ genotype
Protein	Little millet	IPmr 767	12.6		India	Vetriventhan et al. 2021	accession	Accession/ genotype
Protein	Little millet	IPmr 964	13.1		India	Vetriventhan et al. 2021	accession	Accession/ genotype
Protein	Little millet	IPmr 901	12.3		India	Vetriventhan et al. 2021	accession	Accession/ genotype
Protein	Little millet	IPmr 740	13.8		India	Vetriventhan et al. 2021	accession	Accession/ genotype
Protein	Little millet	IPmr 1065	13.2		India	Vetriventhan et al. 2021	accession	Accession/ genotype
Protein	Little millet	IPmr 414	12.2		India	Vetriventhan et al. 2021	accession	Accession/ genotype
Protein	Little millet	IPmr 998	13.3		India	Vetriventhan et al. 2021	accession	Accession/ genotype
Protein	Little millet	IPmr 945	13.3		India	Vetriventhan et al. 2021	accession	Accession/ genotype
Protein	Little millet	IPmr 62	14		India	Vetriventhan et al. 2021	accession	Accession/ genotype
Protein	Little millet	IPmr 977	13		India	Vetriventhan et al. 2021	accession	Accession/ genotype
Protein	Little millet	IPmr 985	13.4		India	Vetriventhan et al. 2021	accession	Accession/ genotype
Protein	Little millet	IPmr 817	12.8		India	Vetriventhan et al. 2021	accession	Accession/ genotype
Protein	Little millet	IPmr 844	12.7		India	Vetriventhan et al. 2021	accession	Accession/ genotype
Protein	Little millet	IPmr 838	10.4		India	Vetriventhan et al. 2021	accession	Accession/ genotype
Protein	Little millet	IPmr 1021	9.3		India	Vetriventhan et al. 2021	accession	Accession/ genotype
Protein	Little millet	IPmr 1008	11.9		India	Vetriventhan et al. 2021	accession	Accession/ genotype
Protein	Little millet	IPmr 725	12.4		India	Vetriventhan et al. 2021	accession	Accession/ genotype
Protein	Little millet	IPmr 452	13.5		India	Vetriventhan et al. 2021	accession	Accession/ genotype
Protein	Little millet	IPmr 980	13.5		India	Vetriventhan et al. 2021	accession	Accession/ genotype
Protein	Little millet	IPmr 981	13.6		India	Vetriventhan et al. 2021	accession	Accession/ genotype
Protein	Little millet	IPmr 449	14.5		India	Vetriventhan et al. 2021	accession	Accession/ genotype
Protein	Little millet	IPmr 992	9.7		India	Vetriventhan et al. 2021	accession	Accession/ genotype
Protein	Little millet	IPmr 840	10.4		India	Vetriventhan et al. 2021	accession	Accession/ genotype
Protein	Little millet	IPmr 900	12.3		India	Vetriventhan et al. 2021	accession	Accession/ genotype
Protein	Little millet	IPmr 737	13.9		India	Vetriventhan et al. 2021	accession	Accession/ genotype
Protein	Little millet	IPmr 718	14.6		India	Vetriventhan et al. 2021	accession	Accession/ genotype
Protein	Little millet	IPmr 807	12.3		India	Vetriventhan et al. 2021	accession	Accession/ genotype
Protein	Little millet	IPmr 825	12.05		India	Vetriventhan et al. 2021	accession	Accession/ genotype
Protein	Little millet	IPmr 983	10.1		India	Vetriventhan et al. 2021	accession	Accession/ genotype
Protein	Little millet	IPmr 417	13		India	Vetriventhan et al. 2021	accession	Accession/ genotype
Protein	Little millet	IPmr 808	11.8		India	Vetriventhan et al. 2021	accession	Accession/ genotype
Protein	Little millet	IPmr 738	12.05		India	Vetriventhan et al. 2021	accession	Accession/ genotype
Protein	Little millet	IPmr 741	12.4		India	Vetriventhan et al. 2021	accession	Accession/ genotype
Protein	Little millet	IPmr 814	12.4		India	Vetriventhan et al. 2021	accession	Accession/ genotype
Protein	Little millet	IPmr 1069	7.2		India	Vetriventhan et al. 2021	accession	Accession/ genotype
Protein	Little millet	IPmr 1063	11.1		India	Vetriventhan et al. 2021	accession	Accession/ genotype
Protein	Little millet	IPmr 1063	9.35		India	Vetriventhan et al. 2021	accession	Accession/ genotype
Protein	Little millet	IPmr 1040	8.85		India	Vetriventhan et al. 2021	accession	Accession/ genotype
Protein	Little millet	IPmr 891	8.2		India	Vetriventhan et al. 2021	accession	Accession/ genotype
Protein	Little millet	IPmr 862	9.4		India	Vetriventhan et al. 2021	accession	Accession/ genotype
Protein	Little millet	IPmr 1042	8.9		India	Vetriventhan et al. 2021	accession	Accession/ genotype
Protein	Little millet	IPmr 1035	9.05		India	Vetriventhan et al. 2021	accession	Accession/ genotype
Protein	Little millet	IPmr 712	9.5		India	Vetriventhan et al. 2021	accession	Accession/ genotype
Protein	Little millet	IPmr 855	9.55		India	Vetriventhan et al. 2021	accession	Accession/ genotype
Protein	Little millet	IPmr 991	9.45		India	Vetriventhan et al. 2021	accession	Accession/ genotype
Protein	Little millet	IPmr 1000	9		India	Vetriventhan et al. 2021	accession	Accession/ genotype
Protein	Little millet	IPmr 974	10.45		India	Vetriventhan et al. 2021	accession	Accession/ genotype
Protein	Little millet	IPmr 877	9.25		India	Vetriventhan et al. 2021	accession	Accession/ genotype
Protein	Little millet	IPmr 875	9.5		India	Vetriventhan et al. 2021	accession	Accession/ genotype
Protein	Little millet	IPmr 1006	10.55		India	Vetriventhan et al. 2021	accession	Accession/ genotype
Protein	Little millet	IPmr 699	10.15		India	Vetriventhan et al. 2021	accession	Accession/ genotype
Protein	Little millet	IPmr 913	12.15		India	Vetriventhan et al. 2021	accession	Accession/ genotype
Protein	Little millet	IPmr 1037	11		India	Vetriventhan et al. 2021	accession	Accession/ genotype
Protein	Little millet	IPmr 997	9.15		India	Vetriventhan et al. 2021	accession	Accession/ genotype
Protein	Little millet	IPmr 897	9.3		India	Vetriventhan et al. 2021	accession	Accession/ genotype
Protein	Little millet	IPmr 700	8.85		India	Vetriventhan et al. 2021	accession	Accession/ genotype
Protein	Little millet	IPmr 1057	9.25		India	Vetriventhan et al. 2021	accession	Accession/ genotype
Protein	Little millet	IPmr 993	8.65		India	Vetriventhan et al. 2021	accession	Accession/ genotype
Protein	Little millet	IPmr 866	9.3		India	Vetriventhan et al. 2021	accession	Accession/ genotype
Protein	Little millet	IPmr 902	9.1		India	Vetriventhan et al. 2021	accession	Accession/ genotype
Protein	Little millet	IPmr 881	9.7		India	Vetriventhan et al. 2021	accession	Accession/ genotype
Protein	Little Millet	POOLED	10.13		India, FCT	Longvah et al., 2017	Pooled variety	variety
Protein	Pearl millet	ICMS-7703	11.9		India	Singh et al. 1987	variety	variety	normal protein content
Protein	Pearl millet	WC-C75	12.2		India	Singh et al. 1987	synthetic variety	variety	normal protein content
Protein	Pearl millet	B-816	15		India	Singh et al. 1987	inbred line line	Accession/ genotype	high protein content
Protein	Pearl millet	WC-190	17.4		India	Singh et al. 1987	inbred line line	Accession/ genotype	high protein content
Protein	Pearl millet	700112	20.8		India	Singh et al. 1987	inbred line line	Accession/ genotype	high protein content
Protein	Pearl millet	ikmv 8201	10.3		West Africa, FCT	Stadlmayr et al., 2012	variety	variety
Protein	Pearl millet	ikmp 1	9.5		West Africa, FCT	Stadlmayr et al., 2012	variety	variety
Protein	Pearl millet	ikmp 2	9		West Africa, FCT	Stadlmayr et al., 2012	variety	variety
Protein	Pearl millet	ikmp 3	14.5		West Africa, FCT	Stadlmayr et al., 2012	variety	variety
Protein	Pearl millet	ikmp 4	13.4		West Africa, FCT	Stadlmayr et al., 2012	variety	variety
Protein	Pearl millet	ikmp 5	14.2		West Africa, FCT	Stadlmayr et al., 2012	variety	variety
Protein	Pearl millet	ikmp 6	16		West Africa, FCT	Stadlmayr et al., 2012	variety	variety
Protein	Pearl millet	ikmp 7	11.7		West Africa, FCT	Stadlmayr et al., 2012	variety	variety
Protein	Pearl millet	ikmp 8	8.4		West Africa, FCT	Stadlmayr et al., 2012	variety	variety
Protein	Pearl millet	ikmp 9	10.6		West Africa, FCT	Stadlmayr et al., 2012	variety	variety
Protein	Pearl millet	ikmp 10	8.7		West Africa, FCT	Stadlmayr et al., 2012	variety	variety
Protein	Pearl millet	ikmp 11	8.1		West Africa, FCT	Stadlmayr et al., 2012	variety	variety
Protein	Pearl millet	ikmp 12	10.4		West Africa, FCT	Stadlmayr et al., 2012	variety	variety
Protein	Pearl millet	ikmp 13	10.2		West Africa, FCT	Stadlmayr et al., 2012	variety	variety
Protein	Pearl millet	Tsholotsho bearded	6.1		East and Central Africa	Kiprotich et al. 2015	variety	variety
Protein	Pearl millet	CIAKAUNGE - Vil 3	9.9		East and Central Africa	Kiprotich et al. 2015	variety	variety
Protein	Pearl millet	ICMV 93771	7.6		East and Central Africa	Kiprotich et al. 2015	variety	variety
Protein	Pearl millet	KIRAKA ORIGINAL	7.6		East and Central Africa	Kiprotich et al. 2015	variety	variety
Protein	Pearl millet	IP 8773	5.3		East and Central Africa	Kiprotich et al. 2015	variety	variety
Protein	Pearl millet	IP 8772	6.1		East and Central Africa	Kiprotich et al. 2015	variety	variety
Protein	Pearl millet	OKOA	4.5		East and Central Africa	Kiprotich et al. 2015	variety	variety
Protein	Pearl millet	ICMV 96603	6.1		East and Central Africa	Kiprotich et al. 2015	variety	variety
Protein	Pearl millet	ICMV 91450	9.1		East and Central Africa	Kiprotich et al. 2015	variety	variety
Protein	Pearl millet	IP 8767	5.3		East and Central Africa	Kiprotich et al. 2015	variety	variety
Protein	Pearl millet	IP 8766	7.6		East and Central Africa	Kiprotich et al. 2015	variety	variety
Protein	Pearl millet	SDMV 96063	6.1		East and Central Africa	Kiprotich et al. 2015	variety	variety
Protein	Pearl millet	IP 10470	7.6		East and Central Africa	Kiprotich et al. 2015	variety	variety
Protein	Pearl millet	IP 8764	6.1		East and Central Africa	Kiprotich et al. 2015	variety	variety
Protein	Pearl millet	SIUKU Vil 4B	7.6		East and Central Africa	Kiprotich et al. 2015	variety	variety
Protein	Pearl millet	IP 10471	8.3		East and Central Africa	Kiprotich et al. 2015	variety	variety
Protein	Pearl millet	KAT PM 2	6.8		East and Central Africa	Kiprotich et al. 2015	variety	variety
Protein	Pearl millet	Okashani 2	6.8		East and Central Africa	Kiprotich et al. 2015	variety	variety
Protein	Pearl millet	Tsholotsho	6.1		East and Central Africa	Kiprotich et al. 2015	variety	variety
Protein	Pearl millet	ICMV 221 BRISTILED	7.6		East and Central Africa	Kiprotich et al. 2015	variety	variety
Protein	Pearl millet	GACAATI VIL -6 (ICRISAT)	6.8		East and Central Africa	Kiprotich et al. 2015	variety	variety
Protein	Pearl millet	IP 8783	7.6		East and Central Africa	Kiprotich et al. 2015	variety	variety
Protein	Pearl millet	KIRAKA Vil -b Vil - 1 (Irunduni)	7.6		East and Central Africa	Kiprotich et al. 2015	variety	variety
Protein	Pearl millet	IP 7390	5.3		East and Central Africa	Kiprotich et al. 2015	variety	variety
Protein	Pearl millet	SDMV 94014	7.6		East and Central Africa	Kiprotich et al. 2015	variety	variety
Protein	Pearl millet	SDMV 90031	6.1		East and Central Africa	Kiprotich et al. 2015	variety	variety
Protein	Pearl millet	SHIBE	7.6		East and Central Africa	Kiprotich et al. 2015	variety	variety
Protein	Pearl millet	IP 6791	6.8		East and Central Africa	Kiprotich et al. 2015	variety	variety
Protein	Pearl millet	NKIRIGACHA Vil 8	7.6		East and Central Africa	Kiprotich et al. 2015	variety	variety
Protein	Pearl millet	ICMA 00888 X HSD 7193	8.3		East and Central Africa	Kiprotich et al. 2015	variety	variety
Protein	Pearl millet	DEMBI YELLOW	8.3		East and Central Africa	Kiprotich et al. 2015	variety	variety
Protein	Pearl millet	SOSAT C 88	6.8		East and Central Africa	Kiprotich et al. 2015	variety	variety
Protein	Pearl millet	ICMV 221-1	8.3		East and Central Africa	Kiprotich et al. 2015	variety	variety
Protein	Pearl millet	KITHARAKA Vil 9	7.6		East and Central Africa	Kiprotich et al. 2015	variety	variety
Protein	Pearl millet	ICMV 221	9.1		East and Central Africa	Kiprotich et al. 2015	variety	variety
Protein	Pearl millet	ICMA 93222 X HSD 2163	6.1		East and Central Africa	Kiprotich et al. 2015	variety	variety
Protein	Pearl millet	KAIGONGI	6.1		East and Central Africa	Kiprotich et al. 2015	variety	variety
Protein	Pearl millet	ICMA 00888 X SERERE - IRAMBA	6.8		East and Central Africa	Kiprotich et al. 2015	variety	variety
Protein	Pearl millet	SIUKU Vil 4a	7.6		East and Central Africa	Kiprotich et al. 2015	variety	variety
Protein	Pearl millet	ICMA 93222 X KIRAKA Vil 1	6.8		East and Central Africa	Kiprotich et al. 2015	variety	variety
Protein	Pearl millet	MIXTURE ( KIRAKA / GACALI Vil 2)	8.3		East and Central Africa	Kiprotich et al. 2015	variety	variety
Protein	Pearl millet	863 A X FS VARIETY	4.5		East and Central Africa	Kiprotich et al. 2015	variety	variety
Protein	Pearl millet	ICMA 93222 X DEMBI YELLOW	6.8		East and Central Africa	Kiprotich et al. 2015	variety	variety
Protein	Pearl millet	KIRAKA Vil 1	7.6		East and Central Africa	Kiprotich et al. 2015	variety	variety
Protein	Pearl millet	SDEA 4L - 17 X HSD 7193	8.3		East and Central Africa	Kiprotich et al. 2015	variety	variety
Protein	Pearl millet	KAT PM 1	8.3		East and Central Africa	Kiprotich et al. 2015	variety	variety
Protein	Pearl millet	ICMA 93222 X ICMV 221	6.8		East and Central Africa	Kiprotich et al. 2015	variety	variety
Protein	Pearl millet	SDEA 4L - 17 X CIAKAUNGE Vil 3 863	6.8		East and Central Africa	Kiprotich et al. 2015	variety	variety
Protein	Pearl millet	863 A X HSD 3508	6.8		East and Central Africa	Kiprotich et al. 2015	variety	variety
Protein	Pearl millet	KIMBEERE	7.6		East and Central Africa	Kiprotich et al. 2015	variety	variety
Protein	Pearl millet	ICMA 93222 X KAT PM 1	7.6		East and Central Africa	Kiprotich et al. 2015	variety	variety
Protein	Pearl millet	ICMA 93222 X CIAKAUNGE Vil - 3	6.1		East and Central Africa	Kiprotich et al. 2015	variety	variety
Protein	Pearl millet	253 X 254/KOG X NKIRIGACHA VIL 8	6.8		East and Central Africa	Kiprotich et al. 2015	variety	variety
Protein	Pearl millet	ICMA 00888 X SIUKU Vil 4b	6.8		East and Central Africa	Kiprotich et al. 2015	variety	variety
Protein	Pearl millet	ICMA 93222 X OKOA	6.8		East and Central Africa	Kiprotich et al. 2015	variety	variety
Protein	Pearl millet	253 X 254/KOG X PMV 3	6.8		East and Central Africa	Kiprotich et al. 2015	variety	variety
Protein	Pearl millet	ICMA 93222 XICMV 221-1	5.3		East and Central Africa	Kiprotich et al. 2015	variety	variety
Protein	Pearl millet	ICMA 00111 X SUDAN 11	7.6		East and Central Africa	Kiprotich et al. 2015	variety	variety
Protein	Pearl millet	ICMA 00888 X MIXTURE (KIRAKA /GACALI VIL 2)	7.6		East and Central Africa	Kiprotich et al. 2015	variety	variety
Protein	Pearl millet	ICMA 00888 X HSD 2163	7.6		East and Central Africa	Kiprotich et al. 2015	variety	variety
Protein	Pearl millet	Shanti	11.54		India	Kulthe et al. 2016	cultivar/ variety	variety
Protein	Pearl millet	Dhanashakti	11.65		India	Kulthe et al. 2016	cultivar/ variety	variety
Protein	Pearl millet	Pioneer 86M64	10.97		India	Kulthe et al. 2016	cultivar/ variety	variety
Protein	Pearl millet	IKMV 8201	11		Burkina Faso	Cheik et al. 2006	cultivar/ variety	variety
Protein	Pearl millet	IKMP 1	10.2		Burkina Faso	Cheik et al. 2006	cultivar/ variety	variety
Protein	Pearl millet	IKMP 2	9.7		Burkina Faso	Cheik et al. 2006	cultivar/ variety	variety
Protein	Pearl millet	IKMP 3	15.5		Burkina Faso	Cheik et al. 2006	cultivar/ variety	variety
Protein	Pearl millet	IKMP 5	14.4		Burkina Faso	Cheik et al. 2006	cultivar/ variety	variety
Protein	Pearl millet	SOSAT C88	15.2		Burkina Faso	Cheik et al. 2006	cultivar/ variety	variety
Protein	Pearl millet	Zatib	17.1		Burkina Faso	Cheik et al. 2006	cultivar/ variety	variety
Protein	Pearl millet	Nahartenga	12.5		Burkina Faso	Cheik et al. 2006	cultivar/ variety	variety
Protein	Pearl millet	TK	9		Burkina Faso	Cheik et al. 2006	cultivar/ variety	variety
Protein	Pearl millet	B 1	9.3		Burkina Faso	Cheik et al. 2006	cultivar/ variety	variety
Protein	Pearl millet	B 2	8.7		Burkina Faso	Cheik et al. 2006	cultivar/ variety	variety
Protein	Pearl millet	KM	11.4		Burkina Faso	Cheik et al. 2006	cultivar/ variety	variety
Protein	Pearl millet	SG	11.2		Burkina Faso	Cheik et al. 2006	cultivar/ variety	variety
Protein	Pearl millet	XX	10.9		Burkina Faso	Cheik et al. 2006	cultivar/ variety	variety
Protein	Pearl millet	CGPMH-1	16.4		Canada	Mustafa et al. 2008	hybrid genotype	Accession/ genotype
Protein	Pearl millet	CGPMH-7	14.1		Canada	Mustafa et al. 2008	hybrid genotype	Accession/ genotype
Protein	Pearl millet	CGPMH-11	16.6		Canada	Mustafa et al. 2008	hybrid genotype	Accession/ genotype
Protein	Pearl millet	CGPMH-20	16.2		Canada	Mustafa et al. 2008	hybrid genotype	Accession/ genotype
Protein	Pearl millet	CGPMH-38	17.3		Canada	Mustafa et al. 2008	hybrid genotype	Accession/ genotype
Protein	Pearl millet	G122	20.5		USA	Chen at al. 1978	genotype	Accession/ genotype
Protein	Pearl millet	G123	16.5		USA	Chen at al. 1978	genotype	Accession/ genotype
Protein	Pearl millet	G125	17.3		USA	Chen at al. 1978	genotype	Accession/ genotype
Protein	Pearl millet	G126	15.8		USA	Chen at al. 1978	genotype	Accession/ genotype
Protein	Pearl millet	G131	15.3		USA	Chen at al. 1978	genotype	Accession/ genotype
Protein	Pearl millet	G133	17.7		USA	Chen at al. 1978	genotype	Accession/ genotype
Protein	Pearl millet	G134	18		USA	Chen at al. 1978	genotype	Accession/ genotype
Protein	Pearl millet	G136	16.3		USA	Chen at al. 1978	genotype	Accession/ genotype
Protein	Pearl millet	G137	17.5		USA	Chen at al. 1978	genotype	Accession/ genotype
Protein	Pearl millet	G142	17.6		USA	Chen at al. 1978	genotype	Accession/ genotype
Protein	Pearl millet	G143	16.3		USA	Chen at al. 1978	genotype	Accession/ genotype
Protein	Pearl millet	G146	15.7		USA	Chen at al. 1978	genotype	Accession/ genotype
Protein	Pearl millet	G148	16.9		USA	Chen at al. 1978	genotype	Accession/ genotype
Protein	Pearl millet	G150	16.7		USA	Chen at al. 1978	genotype	Accession/ genotype
Protein	Pearl millet	G157	17.6		USA	Chen at al. 1978	genotype	Accession/ genotype
Protein	Pearl millet	G159	18.9		USA	Chen at al. 1978	genotype	Accession/ genotype
Protein	Pearl millet	G161	18.3		USA	Chen at al. 1978	genotype	Accession/ genotype
Protein	Pearl millet	G162	16.8		USA	Chen at al. 1978	genotype	Accession/ genotype
Protein	Pearl millet	G165	17.3		USA	Chen at al. 1978	genotype	Accession/ genotype
Protein	Pearl millet	G166	18.2		USA	Chen at al. 1978	genotype	Accession/ genotype
Protein	Pearl millet	G167	17.8		USA	Chen at al. 1978	genotype	Accession/ genotype
Protein	Pearl millet	G168	17.1		USA	Chen at al. 1978	genotype	Accession/ genotype
Protein	Pearl millet	G169	18.3		USA	Chen at al. 1978	genotype	Accession/ genotype
Protein	Pearl millet	G170	18.1		USA	Chen at al. 1978	genotype	Accession/ genotype
Protein	Pearl millet	G172	18.1		USA	Chen at al. 1978	genotype	Accession/ genotype
Protein	Pearl millet	G175	17.1		USA	Chen at al. 1978	genotype	Accession/ genotype
Protein	Pearl millet	G176	16.7		USA	Chen at al. 1978	genotype	Accession/ genotype
Protein	Pearl millet	G179	18.8		USA	Chen at al. 1978	genotype	Accession/ genotype
Protein	Pearl millet	G181	17.4		USA	Chen at al. 1978	genotype	Accession/ genotype
Protein	Pearl millet	G190	17		USA	Chen at al. 1978	genotype	Accession/ genotype
Protein	Pearl millet	G191	16.7		USA	Chen at al. 1978	genotype	Accession/ genotype
Protein	Pearl millet	G192	17.9		USA	Chen at al. 1978	genotype	Accession/ genotype
Protein	Pearl millet	G194	19.4		USA	Chen at al. 1978	genotype	Accession/ genotype
Protein	Pearl millet	G195	17.8		USA	Chen at al. 1978	genotype	Accession/ genotype
Protein	Pearl millet	G197	16.4		USA	Chen at al. 1978	genotype	Accession/ genotype
Protein	Pearl millet	HHB-67 Imp	12.39		India	Berwal et al. 2017	variety	variety	hybrid adopted by farmers
Protein	Pearl millet	HHB-94	11.36		India	Berwal et al. 2017	variety	variety	hybrid adopted by farmers
Protein	Pearl millet	HHB-146	9.27		India	Berwal et al. 2017	variety	variety	hybrid adopted by farmers
Protein	Pearl millet	HHB-197	11.1		India	Berwal et al. 2017	variety	variety	hybrid adopted by farmers
Protein	Pearl millet	HHB-223	11.42		India	Berwal et al. 2017	variety	variety	hybrid adopted by farmers
Protein	Pearl millet	HHB-226	11.96		India	Berwal et al. 2017	variety	variety	hybrid adopted by farmers
Protein	Pearl millet	HHB-234	12.39		India	Berwal et al. 2017	variety	variety	hybrid adopted by farmers
Protein	Pearl millet	WHC-901-445	13.91		India	Berwal et al. 2017	variety	variety	hybrid adopted by farmers
Protein	Pearl millet	HMP-802	13.09		India	Berwal et al. 2017	variety	variety	hybrid adopted by farmers
Protein	Pearl millet	HC-10	12.36		India	Berwal et al. 2017	variety	variety	hybrid adopted by farmers
Protein	Pearl millet	HC-20	12.33		India	Berwal et al. 2017	variety	variety	hybrid adopted by farmers
Protein	Pearl millet	Ka	10.92		Namibia	Shindume et al. 2019	genotype/ line	Accession/ genotype
Protein	Pearl millet	L5AP18	9.45		Namibia	Shindume et al. 2019	genotype/ line	Accession/ genotype
Protein	Pearl millet	L7AP1A	9.85		Namibia	Shindume et al. 2019	genotype/ line	Accession/ genotype
Protein	Pearl millet	R6P1-1	11.84		Namibia	Shindume et al. 2019	genotype/ line	Accession/ genotype
Protein	Pearl millet	RP95	13.56		Namibia	Shindume et al. 2019	genotype/ line	Accession/ genotype
Protein	Pearl millet	L8P5Rep2	13.55		Namibia	Shindume et al. 2019	genotype/ line	Accession/ genotype
Protein	Pearl millet	L8P5Rep1	13		Namibia	Shindume et al. 2019	genotype/ line	Accession/ genotype
Protein	Pearl millet	Oka2	10.49		Namibia	Shindume et al. 2019	genotype/ line	Accession/ genotype
Protein	Pearl millet	L3P5	12.26		Namibia	Shindume et al. 2019	genotype/ line	Accession/ genotype
Protein	Pearl millet	L4P1	12.11		Namibia	Shindume et al. 2019	genotype/ line	Accession/ genotype
Protein	Pearl millet	L8P12	11.12		Namibia	Shindume et al. 2019	genotype/ line	Accession/ genotype
Protein	Pearl millet	L10P18	12.54		Namibia	Shindume et al. 2019	genotype/ line	Accession/ genotype
Protein	Pearl millet	L5P11Rep2	12.99		Namibia	Shindume et al. 2019	genotype/ line	Accession/ genotype
Protein	Pearl millet	L10P13Rep1	12.48		Namibia	Shindume et al. 2019	genotype/ line	Accession/ genotype
Protein	Pearl millet	POOLED	10.96		India, FCT	Longvah et al., 2017	Pooled variety	variety
Protein	Pearl millet	Dembi Millet	16.21		Sudan	Elsadig et al. 2016	genotype	Accession/ genotype
Protein	Pearl millet	Sudan II	16.1		Sudan	Elsadig et al. 2016	genotype	Accession/ genotype
Protein	Pearl millet	Ugandi	15.94		Sudan	Elsadig et al. 2016	genotype	Accession/ genotype
Protein	Pearl millet	Dembi Kabkabia	15.75		Sudan	Elsadig et al. 2016	genotype	Accession/ genotype
Protein	Pearl millet	Dembi Shangal Toby	15.64		Sudan	Elsadig et al. 2016	genotype	Accession/ genotype
Protein	Pearl millet	HSD10331	15.6		Sudan	Elsadig et al. 2016	genotype	Accession/ genotype
Protein	Pearl millet	HSD10392	15.59		Sudan	Elsadig et al. 2016	genotype	Accession/ genotype
Protein	Pearl millet	HSD10362	15.58		Sudan	Elsadig et al. 2016	genotype	Accession/ genotype
Protein	Pearl millet	SADC (Long)	15.54		Sudan	Elsadig et al. 2016	genotype	Accession/ genotype
Protein	Pearl millet	Dembi Sea	15.48		Sudan	Elsadig et al. 2016	genotype	Accession/ genotype
Protein	Pearl millet	SADC (Togo)	15.27		Sudan	Elsadig et al. 2016	genotype	Accession/ genotype
Protein	Pearl millet	HSD10313	15.25		Sudan	Elsadig et al. 2016	genotype	Accession/ genotype
Protein	Pearl millet	HSD7131	15.21		Sudan	Elsadig et al. 2016	genotype	Accession/ genotype
Protein	Pearl millet	HSD10318	15.17		Sudan	Elsadig et al. 2016	genotype	Accession/ genotype
Protein	Pearl millet	HSD7133	15.15		Sudan	Elsadig et al. 2016	genotype	Accession/ genotype
Protein	Pearl millet	HSD10292	15.15		Sudan	Elsadig et al. 2016	genotype	Accession/ genotype
Protein	Pearl millet	HSD55555	15.13		Sudan	Elsadig et al. 2016	genotype	Accession/ genotype
Protein	Pearl millet	HSD10293	15.13		Sudan	Elsadig et al. 2016	genotype	Accession/ genotype
Protein	Pearl millet	HSD7132	15.12		Sudan	Elsadig et al. 2016	genotype	Accession/ genotype
Protein	Pearl millet	HSD7135	15.09		Sudan	Elsadig et al. 2016	genotype	Accession/ genotype
Protein	Pearl millet	HSD10303	15.06		Sudan	Elsadig et al. 2016	genotype	Accession/ genotype
Protein	Pearl millet	HSD10319	15.04		Sudan	Elsadig et al. 2016	genotype	Accession/ genotype
Protein	Pearl millet	HSD7134	15		Sudan	Elsadig et al. 2016	genotype	Accession/ genotype
Protein	Pearl millet	HSD10376	15		Sudan	Elsadig et al. 2016	genotype	Accession/ genotype
Protein	Pearl millet	HSD10294	14.99		Sudan	Elsadig et al. 2016	genotype	Accession/ genotype
Protein	Pearl millet	HSD10309	14.96		Sudan	Elsadig et al. 2016	genotype	Accession/ genotype
Protein	Pearl millet	HSD10291	14.92		Sudan	Elsadig et al. 2016	genotype	Accession/ genotype
Protein	Pearl millet	HSD10354	14.89		Sudan	Elsadig et al. 2016	genotype	Accession/ genotype
Protein	Pearl millet	MCNELC	14.65		Sudan	Elsadig et al. 2016	genotype	Accession/ genotype
Protein	Pearl millet	Ashana	14.57		Sudan	Elsadig et al. 2016	genotype	Accession/ genotype
Protein	Pearl millet	POOLED	10.3		Nepal, FCT	Govt of Nepal, 2017	Pooled variety	variety
Protein	Proso millet	ANUL	10.7		Srilanka	Kumari et al. 2016	variety	variety
Protein	Proso millet	HAML	9.37		Srilanka	Kumari et al. 2016	variety	variety
Protein	Proso millet	IPm 9	12.2		India	Vetriventhan & Upadhyaya, 2018	germplasm accession	Accession/ genotype
Protein	Proso millet	IPm 2784	12.7		Sri Lanka	Vetriventhan & Upadhyaya, 2018	germplasm accession	Accession/ genotype
Protein	Proso millet	IPm 2621	12		India	Vetriventhan & Upadhyaya, 2018	germplasm accession	Accession/ genotype
Protein	Proso millet	IPm 2802	12.2		India	Vetriventhan & Upadhyaya, 2018	germplasm accession	Accession/ genotype
Protein	Proso millet	IPm 390	12.2		India	Vetriventhan & Upadhyaya, 2018	germplasm accession	Accession/ genotype
Protein	Proso millet	IPm 361	12.3		India	Vetriventhan & Upadhyaya, 2018	germplasm accession	Accession/ genotype
Protein	Proso millet	IPm 2824	10.8		India	Vetriventhan & Upadhyaya, 2018	germplasm accession	Accession/ genotype
Protein	Proso millet	IPm 2783	12.8		Sri Lanka	Vetriventhan & Upadhyaya, 2018	germplasm accession	Accession/ genotype
Protein	Proso millet	IPm 366	12.1		India	Vetriventhan & Upadhyaya, 2018	germplasm accession	Accession/ genotype
Protein	Proso millet	IPm 2620	12.6		India	Vetriventhan & Upadhyaya, 2018	germplasm accession	Accession/ genotype
Protein	Proso millet	IPm 2660	13.4		Nepal	Vetriventhan & Upadhyaya, 2018	germplasm accession	Accession/ genotype
Protein	Proso millet	IPm 2685	11.9		Pakistan	Vetriventhan & Upadhyaya, 2018	germplasm accession	Accession/ genotype
Protein	Proso millet	IPm 2158	13.3		Unknown	Vetriventhan & Upadhyaya, 2018	germplasm accession	Accession/ genotype
Protein	Proso millet	IPm 388	12.5		India	Vetriventhan & Upadhyaya, 2018	germplasm accession	Accession/ genotype
Protein	Proso millet	IPm 2700	12.1		India	Vetriventhan & Upadhyaya, 2018	germplasm accession	Accession/ genotype
Protein	Proso millet	IPm 384	12.9		India	Vetriventhan & Upadhyaya, 2018	germplasm accession	Accession/ genotype
Protein	Proso millet	IPm 1545	12.6		Unknown	Vetriventhan & Upadhyaya, 2018	germplasm accession	Accession/ genotype
Protein	Proso millet	IPm 2661	12.9		Nepal	Vetriventhan & Upadhyaya, 2018	germplasm accession	Accession/ genotype
Protein	Proso millet	IPm 362	12.6		India	Vetriventhan & Upadhyaya, 2018	germplasm accession	Accession/ genotype
Protein	Proso millet	IPm 2826	12.4		Romania	Vetriventhan & Upadhyaya, 2018	germplasm accession	Accession/ genotype
Protein	Proso millet	IPm 381	12.9		India	Vetriventhan & Upadhyaya, 2018	germplasm accession	Accession/ genotype
Protein	Proso millet	IPm 2575	16.9		Russia	Vetriventhan & Upadhyaya, 2018	germplasm accession	Accession/ genotype
Protein	Proso millet	IPm 2273	16.1		Unknown	Vetriventhan & Upadhyaya, 2018	germplasm accession	Accession/ genotype
Protein	Proso millet	IPm 2769	16.6		Ukraine	Vetriventhan & Upadhyaya, 2018	germplasm accession	Accession/ genotype
Protein	Proso millet	IPm 2780	14.9		Turkey	Vetriventhan & Upadhyaya, 2018	germplasm accession	Accession/ genotype
Protein	Proso millet	IPm 2037	16.5		Unknown	Vetriventhan & Upadhyaya, 2018	germplasm accession	Accession/ genotype
Protein	Proso millet	Natura	13.65		Hungari	Bagdi et al. 2011	variety	variety
Protein	Proso millet	Biopoint	12.44		Hungari	Bagdi et al. 2011	variety	variety
Protein	Proso millet	Biserka	11.23		Hungari	Bagdi et al. 2011	variety	variety
Protein	Proso millet	GK Piroska	13.84		Hungari	Bagdi et al. 2011	variety	variety
Protein	Proso millet	Gyöngyszem	13.17		Hungari	Bagdi et al. 2011	variety	variety
Protein	Proso millet	Fertődi-2	15.2		Hungari	Bagdi et al. 2011	variety	variety
Protein	Proso millet	Rumenka	14.66		Hungari	Bagdi et al. 2011	variety	variety
Protein	Proso millet	GK Alba	14.17		Hungari	Bagdi et al. 2011	variety	variety
Protein	Proso millet	POOLED	11		Nepal, FCT	Govt of Nepal, 2017	Pooled variety	variety
Protein	Proso millet	POOLED	9.6		China, FCT	Ershow et al. 1990	Pooled variety	variety
Protein	Sorghum	RPASV-3	11.27		India	Chavan et al. 2015	variety	variety
Protein	Sorghum	Pandhari chikni	10.28		India	Chavan et al. 2015	variety	variety
Protein	Sorghum	Dadar local	10.33		India	Chavan et al. 2015	variety	variety
Protein	Sorghum	M-35-1	11.37		India	Chavan et al. 2015	variety	variety
Protein	Sorghum	Phule Revati	11.36		India	Chavan et al. 2015	variety	variety
Protein	Sorghum	SPH-1620	10.43		India	Chavan et al. 2015	variety	variety
Protein	Sorghum	CSH-15R	10.77		India	Chavan et al. 2015	variety	variety
Protein	Sorghum	PAN8625	9.53		South Africa	Mabelebele et al. 2015	variety	variety
Protein	Sorghum	PAN8816	8.11		South Africa	Mabelebele et al. 2015	variety	variety
Protein	Sorghum	NS5511	8.44		South Africa	Mabelebele et al. 2015	variety	variety
Protein	Sorghum	PAN8906	9.54		South Africa	Mabelebele et al. 2015	variety	variety
Protein	Sorghum	Hamra	14.8		Saudi Arabia	Mustafa et al. 2003	variety	variety
Protein	Sorghum	Shahla	14.51		Saudi Arabia	Mustafa et al. 2003	variety	variety
Protein	Sorghum	Baidha	14.75		Saudi Arabia	Mustafa et al. 2003	variety	variety
Protein	Sorghum	B2211	12		Botswana	Motlhaudi et al. 2018	accession	Accession/ genotype
Protein	Sorghum	B2219	11		Botswana	Motlhaudi et al. 2018	accession	Accession/ genotype
Protein	Sorghum	B2225	12		Botswana	Motlhaudi et al. 2018	accession	Accession/ genotype
Protein	Sorghum	B2250	12		Botswana	Motlhaudi et al. 2018	accession	Accession/ genotype
Protein	Sorghum	B2273	12		Botswana	Motlhaudi et al. 2018	accession	Accession/ genotype
Protein	Sorghum	B2300	12		Botswana	Motlhaudi et al. 2018	accession	Accession/ genotype
Protein	Sorghum	N53	12		Namibia	Motlhaudi et al. 2018	accession	Accession/ genotype
Protein	Sorghum	N64	12		Namibia	Motlhaudi et al. 2018	accession	Accession/ genotype
Protein	Sorghum	N147	12		Namibia	Motlhaudi et al. 2018	accession	Accession/ genotype
Protein	Sorghum	N218	12		Namibia	Motlhaudi et al. 2018	accession	Accession/ genotype
Protein	Sorghum	N406	12		Namibia	Motlhaudi et al. 2018	accession	Accession/ genotype
Protein	Sorghum	S65	11		Swaziland	Motlhaudi et al. 2018	accession	Accession/ genotype
Protein	Sorghum	S201	13		Swaziland	Motlhaudi et al. 2018	accession	Accession/ genotype
Protein	Sorghum	S273	11		Swaziland	Motlhaudi et al. 2018	accession	Accession/ genotype
Protein	Sorghum	S386	11		Swaziland	Motlhaudi et al. 2018	accession	Accession/ genotype
Protein	Sorghum	S509	11		Swaziland	Motlhaudi et al. 2018	accession	Accession/ genotype
Protein	Sorghum	S622	12		Swaziland	Motlhaudi et al. 2018	accession	Accession/ genotype
Protein	Sorghum	ZMB3947	11		Zambia	Motlhaudi et al. 2018	accession	Accession/ genotype
Protein	Sorghum	ZMB6986	12		Zambia	Motlhaudi et al. 2018	accession	Accession/ genotype
Protein	Sorghum	ZMB7102	10		Zambia	Motlhaudi et al. 2018	accession	Accession/ genotype
Protein	Sorghum	ZIM1317	11		Zimbabwe	Motlhaudi et al. 2018	accession	Accession/ genotype
Protein	Sorghum	ZIM1522	12		Zimbabwe	Motlhaudi et al. 2018	accession	Accession/ genotype
Protein	Sorghum	ZIM1704	10		Zimbabwe	Motlhaudi et al. 2018	accession	Accession/ genotype
Protein	Sorghum	69029	10.9		South Africa	Shegro et al. 2012	accession	Accession/ genotype	landraces
Protein	Sorghum	69030	11.1		South Africa	Shegro et al. 2012	accession	Accession/ genotype	landraces
Protein	Sorghum	69032	10.65		South Africa	Shegro et al. 2012	accession	Accession/ genotype	landraces
Protein	Sorghum	69127	12.41		South Africa	Shegro et al. 2012	accession	Accession/ genotype	landraces
Protein	Sorghum	69128	10.83		South Africa	Shegro et al. 2012	accession	Accession/ genotype	landraces
Protein	Sorghum	69147	10.38		South Africa	Shegro et al. 2012	accession	Accession/ genotype	landraces
Protein	Sorghum	69164	11.05		South Africa	Shegro et al. 2012	accession	Accession/ genotype	landraces
Protein	Sorghum	69165	9.47		South Africa	Shegro et al. 2012	accession	Accession/ genotype	landraces
Protein	Sorghum	69538	12.32		South Africa	Shegro et al. 2012	accession	Accession/ genotype	landraces
Protein	Sorghum	223525	14.52		South Africa	Shegro et al. 2012	accession	Accession/ genotype	landraces
Protein	Sorghum	223543	9.78		South Africa	Shegro et al. 2012	accession	Accession/ genotype	landraces
Protein	Sorghum	223548	10.3		South Africa	Shegro et al. 2012	accession	Accession/ genotype	landraces
Protein	Sorghum	223551	10.52		South Africa	Shegro et al. 2012	accession	Accession/ genotype	landraces
Protein	Sorghum	223552	9.63		South Africa	Shegro et al. 2012	accession	Accession/ genotype	landraces
Protein	Sorghum	223554	9.25		South Africa	Shegro et al. 2012	accession	Accession/ genotype	landraces
Protein	Sorghum	223555	15.26		South Africa	Shegro et al. 2012	accession	Accession/ genotype	landraces
Protein	Sorghum	223558	14.13		South Africa	Shegro et al. 2012	accession	Accession/ genotype	landraces
Protein	Sorghum	228736	9.58		South Africa	Shegro et al. 2012	accession	Accession/ genotype	landraces
Protein	Sorghum	228739	10.73		South Africa	Shegro et al. 2012	accession	Accession/ genotype	landraces
Protein	Sorghum	228740	10.95		South Africa	Shegro et al. 2012	accession	Accession/ genotype	landraces
Protein	Sorghum	228741	10.66		South Africa	Shegro et al. 2012	accession	Accession/ genotype	landraces
Protein	Sorghum	228919	10.52		South Africa	Shegro et al. 2012	accession	Accession/ genotype	landraces
Protein	Sorghum	229831	8.78		South Africa	Shegro et al. 2012	accession	Accession/ genotype	landraces
Protein	Sorghum	229832	10.77		South Africa	Shegro et al. 2012	accession	Accession/ genotype	landraces
Protein	Sorghum	229833	11.28		South Africa	Shegro et al. 2012	accession	Accession/ genotype	landraces
Protein	Sorghum	229834	10.6		South Africa	Shegro et al. 2012	accession	Accession/ genotype	landraces
Protein	Sorghum	229835	10.72		South Africa	Shegro et al. 2012	accession	Accession/ genotype	landraces
Protein	Sorghum	229838	11.13		South Africa	Shegro et al. 2012	accession	Accession/ genotype	landraces
Protein	Sorghum	237762	9.56		South Africa	Shegro et al. 2012	accession	Accession/ genotype	landraces
Protein	Sorghum	237763	9.76		South Africa	Shegro et al. 2012	accession	Accession/ genotype	landraces
Protein	Sorghum	237779	8.08		South Africa	Shegro et al. 2012	accession	Accession/ genotype	landraces
Protein	Sorghum	216737	10.54		Ethiopia	Gerrano et al. 2016	genotype	Accession/ genotype
Protein	Sorghum	216743	9.67		Ethiopia	Gerrano et al. 2016	genotype	Accession/ genotype
Protein	Sorghum	Birmash	8.11		Ethiopia	Gerrano et al. 2016	genotype	Accession/ genotype
Protein	Sorghum	Gambella-1107	11		Ethiopia	Gerrano et al. 2016	genotype	Accession/ genotype
Protein	Sorghum	IS9302	8.53		Ethiopia	Gerrano et al. 2016	genotype	Accession/ genotype
Protein	Sorghum	Baji	9.38		Ethiopia	Gerrano et al. 2016	genotype	Accession/ genotype
Protein	Sorghum	97MW6129	8.95		Ethiopia	Gerrano et al. 2016	genotype	Accession/ genotype
Protein	Sorghum	97MW6127	9.4		Ethiopia	Gerrano et al. 2016	genotype	Accession/ genotype
Protein	Sorghum	NO253	9.32		Ethiopia	Gerrano et al. 2016	genotype	Accession/ genotype
Protein	Sorghum	PI308453	8.81		Ethiopia	Gerrano et al. 2016	genotype	Accession/ genotype
Protein	Sorghum	97MW6113	7.2		Ethiopia	Gerrano et al. 2016	genotype	Accession/ genotype
Protein	Sorghum	Macia-SA	10.31		Ethiopia	Gerrano et al. 2016	genotype	Accession/ genotype
Protein	Sorghum	M48	9.61		Ethiopia	Gerrano et al. 2016	genotype	Accession/ genotype
Protein	Sorghum	M141	9.06		Ethiopia	Gerrano et al. 2016	genotype	Accession/ genotype
Protein	Sorghum	M81	10.14		Ethiopia	Gerrano et al. 2016	genotype	Accession/ genotype
Protein	Sorghum	M105	9.67		Ethiopia	Gerrano et al. 2016	genotype	Accession/ genotype
Protein	Sorghum	M26	9.94		Ethiopia	Gerrano et al. 2016	genotype	Accession/ genotype
Protein	Sorghum	M101	9.69		Ethiopia	Gerrano et al. 2016	genotype	Accession/ genotype
Protein	Sorghum	M163	9.7		Ethiopia	Gerrano et al. 2016	genotype	Accession/ genotype
Protein	Sorghum	Masekaswere	8.37		Ethiopia	Gerrano et al. 2016	genotype	Accession/ genotype
Protein	Sorghum	Mamolokwane	9.07		Ethiopia	Gerrano et al. 2016	genotype	Accession/ genotype
Protein	Sorghum	M153	8.76		Ethiopia	Gerrano et al. 2016	genotype	Accession/ genotype
Protein	Sorghum	MR-Sorghum	14		Pakistan	F. Ahmad et al. 2018	variety	variety
Protein	Sorghum	Sandal Bar	17		Pakistan	F. Ahmad et al. 2018	variety	variety
Protein	Sorghum	Hegari	11.9		Pakistan	F. Ahmad et al. 2018	variety	variety
Protein	Sorghum	PC-1	14.3		Pakistan	F. Ahmad et al. 2018	variety	variety
Protein	Sorghum	JS-263	15.3		Pakistan	F. Ahmad et al. 2018	variety	variety
Protein	Sorghum	JS-2002	14.5		Pakistan	F. Ahmad et al. 2018	variety	variety
Protein	Sorghum	F-114	12.6		Pakistan	F. Ahmad et al. 2018	variety	variety
Protein	Sorghum	S. Bajra-2011	16.1		Pakistan	F. Ahmad et al. 2018	variety	variety
Protein	Sorghum	MB-87	15.7		Pakistan	F. Ahmad et al. 2018	variety	variety
Protein	Sorghum	Tx430	13.8		South Africa	NG'UNI et al. 2016	variety	variety
Protein	Sorghum	SSP013	11.2		South Africa	NG'UNI et al. 2016	variety	variety
Protein	Sorghum	E35-1	11.9		South Africa	NG'UNI et al. 2016	variety	variety
Protein	Sorghum	SA1785	12.1		South Africa	NG'UNI et al. 2016	variety	variety
Protein	Sorghum	SA1794	12.6		South Africa	NG'UNI et al. 2016	variety	variety
Protein	Sorghum	IS1934	11.9		South Africa	NG'UNI et al. 2016	variety	variety
Protein	Sorghum	SDS1594	11.3		South Africa	NG'UNI et al. 2016	variety	variety
Protein	Sorghum	CY917/1	11.9		South Africa	NG'UNI et al. 2016	variety	variety
Protein	Sorghum	Transk RED No. 2	12.1		South Africa	NG'UNI et al. 2016	variety	variety
Protein	Sorghum	Framida	12.3		South Africa	NG'UNI et al. 2016	variety	variety
Protein	Sorghum	AR-3048	13.9		South Africa	NG'UNI et al. 2016	variety	variety
Protein	Sorghum	IS10364	12.9		South Africa	NG'UNI et al. 2016	variety	variety
Protein	Sorghum	OK11	12		South Africa	NG'UNI et al. 2016	variety	variety
Protein	Sorghum	CIMMYT Entry 49	12.6		South Africa	NG'UNI et al. 2016	variety	variety
Protein	Sorghum	Tx2880	12.4		South Africa	NG'UNI et al. 2016	variety	variety
Protein	Sorghum	IS14380	12.6		South Africa	NG'UNI et al. 2016	variety	variety
Protein	Sorghum	IS14384	11.9		South Africa	NG'UNI et al. 2016	variety	variety
Protein	Sorghum	2426 DCDB Bop Nonoeba	12.5		South Africa	NG'UNI et al. 2016	variety	variety
Protein	Sorghum	2426 DCDB Bop Welgeval	12.6		South Africa	NG'UNI et al. 2016	variety	variety
Protein	Sorghum	Macia	10		South Africa	NG'UNI et al. 2016	variety	variety
Protein	Sorghum	ICSV112	11.6		South Africa	NG'UNI et al. 2016	variety	variety
Protein	Sorghum	Sima	11.9		South Africa	NG'UNI et al. 2016	variety	variety
Protein	Sorghum	Kuyuma	11		South Africa	NG'UNI et al. 2016	variety	variety
Protein	Sorghum	SSP019	11.5		South Africa	NG'UNI et al. 2016	variety	variety
Protein	Sorghum	SSP004	11		South Africa	NG'UNI et al. 2016	variety	variety
Protein	Sorghum	C26	7.99		Western Kenya	Mugalavai et al. 2018	variety	variety
Protein	Sorghum	E97	8.09		Western Kenya	Mugalavai et al. 2018	variety	variety
Protein	Sorghum	E95A	5.56		Western Kenya	Mugalavai et al. 2018	variety	variety
Protein	Sorghum	Kensorg	5.53		Western Kenya	Mugalavai et al. 2018	variety	variety
Protein	Sorghum	E117	8.54		Western Kenya	Mugalavai et al. 2018	variety	variety
Protein	Sorghum	N68	4.28		Western Kenya	Mugalavai et al. 2018	variety	variety
Protein	Sorghum	N57	4.9		Western Kenya	Mugalavai et al. 2018	variety	variety
Protein	Sorghum	RV03	5.9		Italy	Poniteri et al. 2017	cultivar	variety	hybrids
Protein	Sorghum	RV05	8.4		Italy	Poniteri et al. 2017	cultivar	variety	hybrids
Protein	Sorghum	RV06	5.1		Italy	Poniteri et al. 2017	cultivar	variety	hybrids
Protein	Sorghum	RV07	9.3		Italy	Poniteri et al. 2017	cultivar	variety	hybrids
Protein	Sorghum	RV08	8.9		Italy	Poniteri et al. 2017	cultivar	variety	hybrids
Protein	Sorghum	BO1	7.6		Italy	Poniteri et al. 2017	cultivar	variety	hybrids
Protein	Sorghum	Phule Vasudha	9.65		India	Chavan et al. 2009	cultivars	variety
Protein	Sorghum	Phule Anuradha	8.75		India	Chavan et al. 2009	cultivars	variety
Protein	Sorghum	CSV 22	9.04		India	Chavan et al. 2009	cultivars	variety
Protein	Sorghum	Phule Maulee	7.51		India	Chavan et al. 2009	cultivars	variety
Protein	Sorghum	Phule Chitra	9.35		India	Chavan et al. 2009	cultivars	variety
Protein	Sorghum	Sel-3	8.45		India	Chavan et al. 2009	cultivars	variety
Protein	Sorghum	Phule Yashoda	8.27		India	Chavan et al. 2009	cultivars	variety
Protein	Sorghum	M 35-1	8.89		India	Chavan et al. 2009	cultivars	variety
Protein	Sorghum	RSV-290	10.71		India	Chavan et al. 2009	genotype	Accession/ genotype	landraces
Protein	Sorghum	RSV-292	10.65		India	Chavan et al. 2009	genotype	Accession/ genotype	landraces
Protein	Sorghum	RSLG-1275	11.28		India	Chavan et al. 2009	genotype	Accession/ genotype	landraces
Protein	Sorghum	RSLG-428-1	11.9		India	Chavan et al. 2009	genotype	Accession/ genotype	landraces
Protein	Sorghum	RSLG-1238	11.69		India	Chavan et al. 2009	genotype	Accession/ genotype	landraces
Protein	Sorghum	RSV-858	12.11		India	Chavan et al. 2009	genotype	Accession/ genotype	landraces
Protein	Sorghum	RSV-859	12		India	Chavan et al. 2009	genotype	Accession/ genotype	landraces
Protein	Sorghum	RSV-861	11.27		India	Chavan et al. 2009	genotype	Accession/ genotype	landraces
Protein	Sorghum	RSV-868	11.9		India	Chavan et al. 2009	genotype	Accession/ genotype	landraces
Protein	Sorghum	RSV-894	11.22		India	Chavan et al. 2009	genotype	Accession/ genotype	landraces
Protein	Sorghum	RSV-985	11.74		India	Chavan et al. 2009	genotype	Accession/ genotype	landraces
Protein	Sorghum	RSV-992	11.36		India	Chavan et al. 2009	genotype	Accession/ genotype	landraces
Protein	Sorghum	RSV-995	11.36		India	Chavan et al. 2009	genotype	Accession/ genotype	landraces
Protein	Sorghum	RSV-999	11.49		India	Chavan et al. 2009	genotype	Accession/ genotype	landraces
Protein	Sorghum	Local 29	9.6		Ghana	Manful et al. 2001	variety	variety
Protein	Sorghum	Kadaga	11.5		Ghana	Manful et al. 2001	variety	variety
Protein	Sorghum	Naga White	9.5		Ghana	Manful et al. 2001	variety	variety
Protein	Sorghum	Kapaala	9.2		Ghana	Manful et al. 2001	variety	variety
Protein	Sorghum	Mankaraga	10.8		Ghana	Manful et al. 2001	variety	variety
Protein	Sorghum	NSV 1	12.1		Ghana	Manful et al. 2001	variety	variety
Protein	Sorghum	NSV 2	11.1		Ghana	Manful et al. 2001	variety	variety
Protein	Sorghum	POOLED	9.97		India, FCT	Longvah et al., 2017	Pooled variety	variety
Protein	Sorghum	POOLED	10.3		Malawi, FCT	Van Gran et al 2019	Pooled variety	variety
Protein	Sorghum	POOLED	9.3		Kenya, FCT	Mwai 2018	Pooled variety	variety
Protein	Sorghum	POOLED	7.6		Nepal, FCT	Govt of Nepal, 2017	Pooled variety	variety
Protein	Tef	Adama	8.97		Ethiopia	Derib et al. 2018	variety	variety
Protein	Tef	Agirat	6.76		Ethiopia	Derib et al. 2018	variety	variety
Protein	Tef	Ametti	9.87		Ethiopia	Derib et al. 2018	variety	variety
Protein	Tef	Areriti	10.56		Ethiopia	Derib et al. 2018	variety	variety
Protein	Tef	Bolo Giorgis	8.73		Ethiopia	Derib et al. 2018	variety	variety
Protein	Tef	Bolo Silasie	8.55		Ethiopia	Derib et al. 2018	variety	variety
Protein	Tef	Chelle	9.88		Ethiopia	Derib et al. 2018	variety	variety
Protein	Tef	Kombolcha	7.7		Ethiopia	Derib et al. 2018	variety	variety
Protein	Tef	Korma	10.66		Ethiopia	Derib et al. 2018	variety	variety
Protein	Teff	Boset	9.85		Ethiopia	Abewa et al. 2020	genotype	Accession/ genotype
Protein	Teff	Dima	9.84		Ethiopia	Abewa et al. 2020	genotype	Accession/ genotype
Protein	Teff	Etsub	9.84		Ethiopia	Abewa et al. 2020	genotype	Accession/ genotype
Protein	Teff	Keytena	9.99		Ethiopia	Abewa et al. 2020	genotype	Accession/ genotype
Protein	Teff	Kora	9.66		Ethiopia	Abewa et al. 2020	genotype	Accession/ genotype
Protein	Teff	Magna	9.95		Ethiopia	Abewa et al. 2020	genotype	Accession/ genotype
Protein	Teff	Quncho	9.88		Ethiopia	Abewa et al. 2020	genotype	Accession/ genotype
Protein	Teff	Simada	9.91		Ethiopia	Abewa et al. 2020	genotype	Accession/ genotype
Protein	Teff	Tsedy	10.1		Ethiopia	Abewa et al. 2020	genotype	Accession/ genotype
Protein	Teff	POOLED	13.3		Kenya, FCT	Mwai 2018	Pooled variety	variety
Fat	Barnyard millet	IT153591	3.01		Korea	Kim et al. 2011	variety	variety
Fat	Barnyard millet	IT153599	6.71		Korea	Kim et al. 2011	variety	variety
Fat	Barnyard millet	IT153600	6.9		Korea	Kim et al. 2011	variety	variety
Fat	Barnyard millet	IT153604	6.1		Korea	Kim et al. 2011	variety	variety
Fat	Barnyard millet	IT153607	4		Korea	Kim et al. 2011	variety	variety
Fat	Barnyard millet	IT170609	5.39		Korea	Kim et al. 2011	variety	variety
Fat	Barnyard millet	IT170610	6.54		Korea	Kim et al. 2011	variety	variety
Fat	Barnyard millet	IT186707	6.12		Korea	Kim et al. 2011	variety	variety
Fat	Barnyard millet	K141285	5.48		Korea	Kim et al. 2011	variety	variety
Fat	Barnyard millet	K141286	6.03		Korea	Kim et al. 2011	variety	variety
Fat	Barnyard millet	K141287	5.52		Korea	Kim et al. 2011	variety	variety
Fat	Barnyard millet	K141288	6.3		Korea	Kim et al. 2011	variety	variety
Fat	Barnyard millet	K141289	5.31		Korea	Kim et al. 2011	variety	variety
Fat	Brown top millet	BTAVT6	5.28		India	Hemamalini et al. 2021	variety	variety
Fat	Finger millet	GN 1	1.2		India	Nakarani et al. 2020	Genotype	Accession/ genotype
Fat	Finger millet	GN 2	1.4		India	Nakarani et al. 2020	Genotype	Accession/ genotype
Fat	Finger millet	GN 3	1.5		India	Nakarani et al. 2020	Genotype	Accession/ genotype
Fat	Finger millet	GN 4	1.3		India	Nakarani et al. 2020	Genotype	Accession/ genotype
Fat	Finger millet	GN 5	1.3		India	Nakarani et al. 2020	Genotype	Accession/ genotype
Fat	Finger millet	GNN 6	1.4		India	Nakarani et al. 2020	Genotype	Accession/ genotype
Fat	Finger millet	GNN 7	1.4		India	Nakarani et al. 2020	Genotype	Accession/ genotype
Fat	Finger millet	WN 585	1.6		India	Nakarani et al. 2020	Genotype	Accession/ genotype
Fat	Finger millet	WN 548	1.7		India	Nakarani et al. 2020	Genotype	Accession/ genotype
Fat	Finger millet	WN 550	1.7		India	Nakarani et al. 2020	Genotype	Accession/ genotype
Fat	Finger millet	Ateso	2.23		Machakos	Shiabiro et al. 2014	Genotype	Accession/ genotype
Fat	Finger millet	Gulu-E	2.18		Machakos	Shiabiro et al. 2014	Genotype	Accession/ genotype
Fat	Finger millet	FMV-1	1.98		Machakos	Shiabiro et al. 2014	Genotype	Accession/ genotype
Fat	Finger millet	KNE-479	1.27		Machakos	Shiabiro et al. 2014	Genotype	Accession/ genotype
Fat	Finger millet	KNE-1034	1.62		Machakos	Shiabiro et al. 2014	Genotype	Accession/ genotype
Fat	Finger millet	Nyaikuro	1.62		Machakos	Shiabiro et al. 2014	Genotype	Accession/ genotype
Fat	Finger millet	GBK043052	1.78		Kenya	Otieno et al. 2021	variety	variety
Fat	Finger millet	GBK043180	1.33		Kenya	Otieno et al. 2021	variety	variety
Fat	Finger millet	GBK043275	1.7		Kenya	Otieno et al. 2021	variety	variety
Fat	Finger millet	GBK51717	1.57		Uganda	Otieno et al. 2021	variety	variety
Fat	Finger millet	GBK051721	1.4		Uganda	Otieno et al. 2021	variety	variety
Fat	Finger millet	GBK051718	1.61		Uganda	Otieno et al. 2021	variety	variety
Fat	Finger millet	GBK 051725	1.18		Uganda	Otieno et al. 2021	variety	variety
Fat	Finger millet	GBK51705	1.56		Uganda	Otieno et al. 2021	variety	variety
Fat	Finger millet	CHEPNYALTET	1.74		Kenya	Otieno et al. 2021	variety	variety
Fat	Finger millet	GBK057855	3.79		Uganda	Otieno et al. 2021	variety	variety
Fat	Finger millet	KH2396	4.2		Ethiopia	Barbeau et al. 1993	Wild cultivars	variety
Fat	Finger millet	KH265	4.5		Kenya	Barbeau et al. 1993	Domesticated cultivars	variety
Fat	Finger millet	KH2333	3.8		Bihar, India	Barbeau et al. 1993	Domesticated cultivars	variety
Fat	Finger millet	KH2301	4.3		Ethiopia	Barbeau et al. 1993	Domesticated cultivars	variety
Fat	Finger millet	KH2388	4.4		India	Barbeau et al. 1993	Domesticated cultivars	variety
Fat	Finger millet	KH2324	4.2		India	Barbeau et al. 1993	Domesticated cultivars	variety
Fat	Finger millet	KH2339	3.9		India	Barbeau et al. 1993	Domesticated cultivars	variety
Fat	Finger millet	MIRavi	0.13		Srilanka	Kumari et al. 2016	variety	variety
Fat	Finger millet	MIRav	0.79		Srilanka	Kumari et al. 2016	variety	variety
Fat	Finger millet	MIOsh	0.84		Srilanka	Kumari et al. 2016	variety	variety
Fat	Finger millet	MOL	0.1		Srilanka	Kumari et al. 2016	variety	variety
Fat	Finger millet	AML	0.6		Srilanka	Kumari et al. 2016	variety	variety
Fat	Finger millet	HAML	0.27		Srilanka	Kumari et al. 2016	variety	variety
Fat	Finger millet	WAL	0.27		Srilanka	Kumari et al. 2016	variety	variety
Fat	Finger millet	THAL	0.59		Srilanka	Kumari et al. 2016	variety	variety
Fat	Finger millet	ALUOsh	0.59		Srilanka	Kumari et al. 2016	variety	variety
Fat	Finger millet	NIKOsh	0.34		Srilanka	Kumari et al. 2016	variety	variety
Fat	Finger millet	BATRav	0.48		Srilanka	Kumari et al. 2016	variety	variety
Fat	Fonio	Finiba/Kassangara	4.4		Mali	Koreissi et al. 2013	variety	variety	landraces
Fat	Fonio	Die`ni	3.6		Mali	Koreissi et al. 2013	variety	variety	landraces
Fat	Fonio	Kassangara	4.5		Mali	Koreissi et al. 2013	variety	variety	landraces
Fat	Fonio	Finiba	4.2		Mali	Koreissi et al. 2013	variety	variety	landraces
Fat	Fonio	Petema	3.9		Mali	Koreissi et al. 2013	variety	variety	landraces
Fat	Fonio	Pe´azo 1	3.8		Mali	Koreissi et al. 2013	variety	variety	landraces
Fat	Fonio	Tioi	4.4		Mali	Koreissi et al. 2013	variety	variety	landraces
Fat	Fonio	Peˆye	4		Mali	Koreissi et al. 2013	variety	variety	landraces
Fat	Fonio	Tama	4.1		Mali	Koreissi et al. 2013	variety	variety	landraces
Fat	Fonio	Tamatioi	4		Mali	Koreissi et al. 2013	variety	variety	landraces
Fat	Fonio	Tamabe´	4.5		Mali	Koreissi et al. 2013	variety	variety	landraces
Fat	Fonio	Pe´azo 2	4.5		Mali	Koreissi et al. 2013	variety	variety	landraces
Fat	Foxtail millet	RFM-10	3.76		India	Kamatar et al. 2015	genotype	Accession/ genotype	44germplasm, 31 lines
Fat	Foxtail millet	H-1	3.42		India	Kamatar et al. 2015	genotype	Accession/ genotype	44germplasm, 31 lines
Fat	Foxtail millet	H-2	3.8		India	Kamatar et al. 2015	genotype	Accession/ genotype	44germplasm, 31 lines
Fat	Foxtail millet	CO-4	3.34		India	Kamatar et al. 2015	genotype	Accession/ genotype	44germplasm, 31 lines
Fat	Foxtail millet	K-2	3.14		India	Kamatar et al. 2015	genotype	Accession/ genotype	44germplasm, 31 lines
Fat	Foxtail millet	Krishnadevaraya	3.28		India	Kamatar et al. 2015	genotype	Accession/ genotype	44germplasm, 31 lines
Fat	Foxtail millet	Narasimharaya	3.51		India	Kamatar et al. 2015	genotype	Accession/ genotype	44germplasm, 31 lines
Fat	Foxtail millet	Chithra	3.69		India	Kamatar et al. 2015	genotype	Accession/ genotype	44germplasm, 31 lines
Fat	Foxtail millet	Arjuna	3.63		India	Kamatar et al. 2015	genotype	Accession/ genotype	44germplasm, 31 lines
Fat	Foxtail millet	Srilakshmi	3.9		India	Kamatar et al. 2015	genotype	Accession/ genotype	44germplasm, 31 lines
Fat	Foxtail millet	K-222-1	3.46		India	Kamatar et al. 2015	genotype	Accession/ genotype	44germplasm, 31 lines
Fat	Foxtail millet	Sia -3085	3.31		India	Kamatar et al. 2015	genotype	Accession/ genotype	44germplasm, 31 lines
Fat	Foxtail millet	Meera	3.57		India	Kamatar et al. 2015	genotype	Accession/ genotype	44germplasm, 31 lines
Fat	Foxtail millet	Pratapkagni	3.7		India	Kamatar et al. 2015	genotype	Accession/ genotype	44germplasm, 31 lines
Fat	Foxtail millet	Ise 375	3.59		India	Kamatar et al. 2015	genotype	Accession/ genotype	44germplasm, 31 lines
Fat	Foxtail millet	Ise 1312	3.23		India	Kamatar et al. 2015	genotype	Accession/ genotype	44germplasm, 31 lines
Fat	Foxtail millet	Ise 1468	3.65		India	Kamatar et al. 2015	genotype	Accession/ genotype	44germplasm, 31 lines
Fat	Foxtail millet	Ise 1685	3.08		India	Kamatar et al. 2015	genotype	Accession/ genotype	44germplasm, 31 lines
Fat	Foxtail millet	Ise 900	4.16		India	Kamatar et al. 2015	genotype	Accession/ genotype	44germplasm, 31 lines
Fat	Foxtail millet	Ise 140	3.48		India	Kamatar et al. 2015	genotype	Accession/ genotype	44germplasm, 31 lines
Fat	Foxtail millet	Ise 758	3.68		India	Kamatar et al. 2015	genotype	Accession/ genotype	44germplasm, 31 lines
Fat	Foxtail millet	Ise 1647	3.57		India	Kamatar et al. 2015	genotype	Accession/ genotype	44germplasm, 31 lines
Fat	Foxtail millet	Ise 931	3.82		India	Kamatar et al. 2015	genotype	Accession/ genotype	44germplasm, 31 lines
Fat	Foxtail millet	GS 2164	3.57		India	Kamatar et al. 2015	genotype	Accession/ genotype	44germplasm, 31 lines
Fat	Foxtail millet	GS 2040	3.51		India	Kamatar et al. 2015	genotype	Accession/ genotype	44germplasm, 31 lines
Fat	Foxtail millet	GS 515	3.55		India	Kamatar et al. 2015	genotype	Accession/ genotype	44germplasm, 31 lines
Fat	Foxtail millet	GS 949	3.4		India	Kamatar et al. 2015	genotype	Accession/ genotype	44germplasm, 31 lines
Fat	Foxtail millet	GS 592	3.91		India	Kamatar et al. 2015	genotype	Accession/ genotype	44germplasm, 31 lines
Fat	Foxtail millet	GS 511	3.67		India	Kamatar et al. 2015	genotype	Accession/ genotype	44germplasm, 31 lines
Fat	Foxtail millet	GS 90	3.38		India	Kamatar et al. 2015	genotype	Accession/ genotype	44germplasm, 31 lines
Fat	Foxtail millet	GS 121	3.58		India	Kamatar et al. 2015	genotype	Accession/ genotype	44germplasm, 31 lines
Fat	Foxtail millet	GS 271	3.86		India	Kamatar et al. 2015	genotype	Accession/ genotype	44germplasm, 31 lines
Fat	Foxtail millet	GS 740	3.86		India	Kamatar et al. 2015	genotype	Accession/ genotype	44germplasm, 31 lines
Fat	Foxtail millet	GS 1000	3.6		India	Kamatar et al. 2015	genotype	Accession/ genotype	44germplasm, 31 lines
Fat	Foxtail millet	GS 1483	3.41		India	Kamatar et al. 2015	genotype	Accession/ genotype	44germplasm, 31 lines
Fat	Foxtail millet	GS 1560	3.52		India	Kamatar et al. 2015	genotype	Accession/ genotype	44germplasm, 31 lines
Fat	Foxtail millet	GS 2099	3.71		India	Kamatar et al. 2015	genotype	Accession/ genotype	44germplasm, 31 lines
Fat	Foxtail millet	GS 2105	3.59		India	Kamatar et al. 2015	genotype	Accession/ genotype	44germplasm, 31 lines
Fat	Foxtail millet	GS 2109	3.11		India	Kamatar et al. 2015	genotype	Accession/ genotype	44germplasm, 31 lines
Fat	Foxtail millet	GS 2126	3.07		India	Kamatar et al. 2015	genotype	Accession/ genotype	44germplasm, 31 lines
Fat	Foxtail millet	GS 2159	3.76		India	Kamatar et al. 2015	genotype	Accession/ genotype	44germplasm, 31 lines
Fat	Foxtail millet	GS 2192	3.5		India	Kamatar et al. 2015	genotype	Accession/ genotype	44germplasm, 31 lines
Fat	Foxtail millet	GS 2197	3.49		India	Kamatar et al. 2015	genotype	Accession/ genotype	44germplasm, 31 lines
Fat	Foxtail millet	GS 2215	3.76		India	Kamatar et al. 2015	genotype	Accession/ genotype	44germplasm, 31 lines
Fat	Foxtail millet	DHF 21	3.35		India	Kamatar et al. 2015	genotype	Accession/ genotype	44germplasm, 31 lines
Fat	Foxtail millet	DHF 22	3.08		India	Kamatar et al. 2015	genotype	Accession/ genotype	44germplasm, 31 lines
Fat	Foxtail millet	DHF 23	3.81		India	Kamatar et al. 2015	genotype	Accession/ genotype	44germplasm, 31 lines
Fat	Foxtail millet	DHF 24	2.79		India	Kamatar et al. 2015	genotype	Accession/ genotype	44germplasm, 31 lines
Fat	Foxtail millet	DHF 25	2.92		India	Kamatar et al. 2015	genotype	Accession/ genotype	44germplasm, 31 lines
Fat	Foxtail millet	DHF 26	2.98		India	Kamatar et al. 2015	genotype	Accession/ genotype	44germplasm, 31 lines
Fat	Foxtail millet	DHF 27	2.79		India	Kamatar et al. 2015	genotype	Accession/ genotype	44germplasm, 31 lines
Fat	Foxtail millet	DHF 28	2.79		India	Kamatar et al. 2015	genotype	Accession/ genotype	44germplasm, 31 lines
Fat	Foxtail millet	DHF 29	2.83		India	Kamatar et al. 2015	genotype	Accession/ genotype	44germplasm, 31 lines
Fat	Foxtail millet	DHF-30	3.32		India	Kamatar et al. 2015	genotype	Accession/ genotype	44germplasm, 31 lines
Fat	Foxtail millet	ST-13	3.8		India	Kamatar et al. 2015	genotype	Accession/ genotype	44germplasm, 31 lines
Fat	Foxtail millet	DHF 1	3.67		India	Kamatar et al. 2015	genotype	Accession/ genotype	44germplasm, 31 lines
Fat	Foxtail millet	DHF 2	3.53		India	Kamatar et al. 2015	genotype	Accession/ genotype	44germplasm, 31 lines
Fat	Foxtail millet	DHF 3	3.65		India	Kamatar et al. 2015	genotype	Accession/ genotype	44germplasm, 31 lines
Fat	Foxtail millet	DHF 4	3.48		India	Kamatar et al. 2015	genotype	Accession/ genotype	44germplasm, 31 lines
Fat	Foxtail millet	DHF 5	3.63		India	Kamatar et al. 2015	genotype	Accession/ genotype	44germplasm, 31 lines
Fat	Foxtail millet	DHF 6	3.43		India	Kamatar et al. 2015	genotype	Accession/ genotype	44germplasm, 31 lines
Fat	Foxtail millet	DHF 7	3.42		India	Kamatar et al. 2015	genotype	Accession/ genotype	44germplasm, 31 lines
Fat	Foxtail millet	DHF 8	3.65		India	Kamatar et al. 2015	genotype	Accession/ genotype	44germplasm, 31 lines
Fat	Foxtail millet	DHF 9	3.51		India	Kamatar et al. 2015	genotype	Accession/ genotype	44germplasm, 31 lines
Fat	Foxtail millet	DHF 10	3.75		India	Kamatar et al. 2015	genotype	Accession/ genotype	44germplasm, 31 lines
Fat	Foxtail millet	DHF 11	3.57		India	Kamatar et al. 2015	genotype	Accession/ genotype	44germplasm, 31 lines
Fat	Foxtail millet	DHF 12	3.93		India	Kamatar et al. 2015	genotype	Accession/ genotype	44germplasm, 31 lines
Fat	Foxtail millet	DHF 13	3.79		India	Kamatar et al. 2015	genotype	Accession/ genotype	44germplasm, 31 lines
Fat	Foxtail millet	DHF 14	3.53		India	Kamatar et al. 2015	genotype	Accession/ genotype	44germplasm, 31 lines
Fat	Foxtail millet	DHF 15	3.62		India	Kamatar et al. 2015	genotype	Accession/ genotype	44germplasm, 31 lines
Fat	Foxtail millet	DHF 16	3.44		India	Kamatar et al. 2015	genotype	Accession/ genotype	44germplasm, 31 lines
Fat	Foxtail millet	DHF 17	3.65		India	Kamatar et al. 2015	genotype	Accession/ genotype	44germplasm, 31 lines
Fat	Foxtail millet	DHF 18	3.8		India	Kamatar et al. 2015	genotype	Accession/ genotype	44germplasm, 31 lines
Fat	Foxtail millet	DHF 19	3.81		India	Kamatar et al. 2015	genotype	Accession/ genotype	44germplasm, 31 lines
Fat	Foxtail millet	DHF 20	3.57		India	Kamatar et al. 2015	genotype	Accession/ genotype	44germplasm, 31 lines
Fat	Foxtail millet	Hmt-100-1	3.83		India	Kamatar et al. 2015	genotype	Accession/ genotype	44germplasm, 31 lines
Fat	Foxtail millet	PS-4	3.59		India	Kamatar et al. 2015	genotype	Accession/ genotype	44germplasm, 31 lines
Fat	Foxtail millet	Sia-326	3.45		India	Kamatar et al. 2015	genotype	Accession/ genotype	44germplasm, 31 lines
Fat	Foxtail millet	PALL	4.5		Srilanka	Kumari et al. 2016	variety	variety
Fat	Foxtail millet	HAML	3.84		Srilanka	Kumari et al. 2016	variety	variety
Fat	Foxtail millet	MOL	4.58		Srilanka	Kumari et al. 2016	variety	variety
Fat	Foxtail millet	JAFL	4.23		Srilanka	Kumari et al. 2016	variety	variety
Fat	Job's tears	Ngum	4.26		India	Luithui and Meera 2018	variety	variety
Fat	Job's tears	PTA-1	8.13		Indonesia	Ramadhan et al 2023	accession	Accession/ genotype
Fat	Job's tears	KKD-3	8.08		Indonesia	Ramadhan et al 2024	accession	Accession/ genotype
Fat	Job's tears	PH-4	8.44		Indonesia	Ramadhan et al 2025	accession	Accession/ genotype
Fat	Job's tears	BTA-2	6.83		Indonesia	Ramadhan et al 2026	accession	Accession/ genotype
Fat	Job's tears	GT-2	7.98		Indonesia	Ramadhan et al 2027	accession	Accession/ genotype
Fat	Job's tears	TJR-2	8.12		Indonesia	Ramadhan et al 2028	accession	Accession/ genotype
Fat	Pearl millet	ikmv 8201	7.4		West Africa, FCT	Stadlmayr et al., 2012	variety	variety
Fat	Pearl millet	ikmp 1	6.9		West Africa, FCT	Stadlmayr et al., 2012	variety	variety
Fat	Pearl millet	ikmp 2	7.1		West Africa, FCT	Stadlmayr et al., 2012	variety	variety
Fat	Pearl millet	ikmp 3	9		West Africa, FCT	Stadlmayr et al., 2012	variety	variety
Fat	Pearl millet	ikmp 4	9		West Africa, FCT	Stadlmayr et al., 2012	variety	variety
Fat	Pearl millet	ikmp 5	10.2		West Africa, FCT	Stadlmayr et al., 2012	variety	variety
Fat	Pearl millet	ikmp 6	6.9		West Africa, FCT	Stadlmayr et al., 2012	variety	variety
Fat	Pearl millet	ikmp 7	6.8		West Africa, FCT	Stadlmayr et al., 2012	variety	variety
Fat	Pearl millet	ikmp 8	7.2		West Africa, FCT	Stadlmayr et al., 2012	variety	variety
Fat	Pearl millet	ikmp 9	8.4		West Africa, FCT	Stadlmayr et al., 2012	variety	variety
Fat	Pearl millet	ikmp 10	7.8		West Africa, FCT	Stadlmayr et al., 2012	variety	variety
Fat	Pearl millet	ikmp 11	7.7		West Africa, FCT	Stadlmayr et al., 2012	variety	variety
Fat	Pearl millet	ikmp 12	7.4		West Africa, FCT	Stadlmayr et al., 2012	variety	variety
Fat	Pearl millet	ikmp 13	7.6		West Africa, FCT	Stadlmayr et al., 2012	variety	variety
Fat	Pearl millet	ICMS-7703	5.4		India	Singh et al. 1987	variety	variety	normal protein content
Fat	Pearl millet	WC-C75	5.5		India	Singh et al. 1987	synthetic variety	variety	normal protein content
Fat	Pearl millet	B-816	4.7		India	Singh et al. 1987	inbred line line	Accession/ genotype	high protein content
Fat	Pearl millet	WC-190	4.1		India	Singh et al. 1987	inbred line line	Accession/ genotype	high protein content
Fat	Pearl millet	700112	4.3		India	Singh et al. 1987	inbred line line	Accession/ genotype	high protein content
Fat	Pearl millet	Shanti	5.96		India	Kulthe et al. 2016	cultivar/ variety	variety
Fat	Pearl millet	Pioneer 86M64	5.14		India	Kulthe et al. 2016	cultivar/ variety	variety
Fat	Pearl millet	IKMV 8201	7.3		Burkina Faso	Cheik et al. 2006	cultivar/ variety	variety
Fat	Pearl millet	IKMP 1	6.9		Burkina Faso	Cheik et al. 2006	cultivar/ variety	variety
Fat	Pearl millet	IKMP 2	7.1		Burkina Faso	Cheik et al. 2006	cultivar/ variety	variety
Fat	Pearl millet	IKMP 3	9		Burkina Faso	Cheik et al. 2006	cultivar/ variety	variety
Fat	Pearl millet	IKMP 5	9		Burkina Faso	Cheik et al. 2006	cultivar/ variety	variety
Fat	Pearl millet	SOSAT C88	10.2		Burkina Faso	Cheik et al. 2006	cultivar/ variety	variety
Fat	Pearl millet	Zatib	6.9		Burkina Faso	Cheik et al. 2006	cultivar/ variety	variety
Fat	Pearl millet	Nahartenga	6.8		Burkina Faso	Cheik et al. 2006	cultivar/ variety	variety
Fat	Pearl millet	TK	7.2		Burkina Faso	Cheik et al. 2006	cultivar/ variety	variety
Fat	Pearl millet	B 1	7.8		Burkina Faso	Cheik et al. 2006	cultivar/ variety	variety
Fat	Pearl millet	B 2	7.7		Burkina Faso	Cheik et al. 2006	cultivar/ variety	variety
Fat	Pearl millet	KM	8.4		Burkina Faso	Cheik et al. 2006	cultivar/ variety	variety
Fat	Pearl millet	SG	7.4		Burkina Faso	Cheik et al. 2006	cultivar/ variety	variety
Fat	Pearl millet	XX	7.6		Burkina Faso	Cheik et al. 2006	cultivar/ variety	variety
Fat	Pearl millet	G122	7.2		USA	Chen at al. 1978	genotype	Accession/ genotype
Fat	Pearl millet	G123	4.3		USA	Chen at al. 1978	genotype	Accession/ genotype
Fat	Pearl millet	G125	6.2		USA	Chen at al. 1978	genotype	Accession/ genotype
Fat	Pearl millet	G126	7		USA	Chen at al. 1978	genotype	Accession/ genotype
Fat	Pearl millet	G131	7.4		USA	Chen at al. 1978	genotype	Accession/ genotype
Fat	Pearl millet	G133	5.7		USA	Chen at al. 1978	genotype	Accession/ genotype
Fat	Pearl millet	G134	6.7		USA	Chen at al. 1978	genotype	Accession/ genotype
Fat	Pearl millet	G136	5.8		USA	Chen at al. 1978	genotype	Accession/ genotype
Fat	Pearl millet	G137	6.1		USA	Chen at al. 1978	genotype	Accession/ genotype
Fat	Pearl millet	G142	4.2		USA	Chen at al. 1978	genotype	Accession/ genotype
Fat	Pearl millet	G143	6.8		USA	Chen at al. 1978	genotype	Accession/ genotype
Fat	Pearl millet	G146	6		USA	Chen at al. 1978	genotype	Accession/ genotype
Fat	Pearl millet	G148	7.1		USA	Chen at al. 1978	genotype	Accession/ genotype
Fat	Pearl millet	G150	5.9		USA	Chen at al. 1978	genotype	Accession/ genotype
Fat	Pearl millet	G157	4.6		USA	Chen at al. 1978	genotype	Accession/ genotype
Fat	Pearl millet	G159	6.4		USA	Chen at al. 1978	genotype	Accession/ genotype
Fat	Pearl millet	G161	7.3		USA	Chen at al. 1978	genotype	Accession/ genotype
Fat	Pearl millet	G162	5.4		USA	Chen at al. 1978	genotype	Accession/ genotype
Fat	Pearl millet	G165	4.8		USA	Chen at al. 1978	genotype	Accession/ genotype
Fat	Pearl millet	G166	5.6		USA	Chen at al. 1978	genotype	Accession/ genotype
Fat	Pearl millet	G167	5.9		USA	Chen at al. 1978	genotype	Accession/ genotype
Fat	Pearl millet	G168	6.7		USA	Chen at al. 1978	genotype	Accession/ genotype
Fat	Pearl millet	G169	5.7		USA	Chen at al. 1978	genotype	Accession/ genotype
Fat	Pearl millet	G170	7.2		USA	Chen at al. 1978	genotype	Accession/ genotype
Fat	Pearl millet	G172	7.1		USA	Chen at al. 1978	genotype	Accession/ genotype
Fat	Pearl millet	G175	6.1		USA	Chen at al. 1978	genotype	Accession/ genotype
Fat	Pearl millet	G176	7.4		USA	Chen at al. 1978	genotype	Accession/ genotype
Fat	Pearl millet	G179	7.1		USA	Chen at al. 1978	genotype	Accession/ genotype
Fat	Pearl millet	G181	7.3		USA	Chen at al. 1978	genotype	Accession/ genotype
Fat	Pearl millet	G190	6.3		USA	Chen at al. 1978	genotype	Accession/ genotype
Fat	Pearl millet	G191	6.2		USA	Chen at al. 1978	genotype	Accession/ genotype
Fat	Pearl millet	G192	6.9		USA	Chen at al. 1978	genotype	Accession/ genotype
Fat	Pearl millet	G194	4.3		USA	Chen at al. 1978	genotype	Accession/ genotype
Fat	Pearl millet	G195	6.1		USA	Chen at al. 1978	genotype	Accession/ genotype
Fat	Pearl millet	G197	4.4		USA	Chen at al. 1978	genotype	Accession/ genotype
Fat	Pearl millet	Ka	6.2		Namibia	F.N Shindume et al. 2019	genotype/ line	Accession/ genotype
Fat	Pearl millet	L5AP18	5.74		Namibia	F.N Shindume et al. 2019	genotype/ line	Accession/ genotype
Fat	Pearl millet	L7AP1A	5.72		Namibia	F.N Shindume et al. 2019	genotype/ line	Accession/ genotype
Fat	Pearl millet	R6P1-1	5.56		Namibia	F.N Shindume et al. 2019	genotype/ line	Accession/ genotype
Fat	Pearl millet	RP95	5.25		Namibia	F.N Shindume et al. 2019	genotype/ line	Accession/ genotype
Fat	Pearl millet	L8P5Rep2	5.57		Namibia	F.N Shindume et al. 2019	genotype/ line	Accession/ genotype
Fat	Pearl millet	L8P5Rep1	5.34		Namibia	F.N Shindume et al. 2019	genotype/ line	Accession/ genotype
Fat	Pearl millet	Oka2	6.33		Namibia	F.N Shindume et al. 2019	genotype/ line	Accession/ genotype
Fat	Pearl millet	L3P5	5.78		Namibia	F.N Shindume et al. 2019	genotype/ line	Accession/ genotype
Fat	Pearl millet	L4P1	5.62		Namibia	F.N Shindume et al. 2019	genotype/ line	Accession/ genotype
Fat	Pearl millet	L8P12	6.36		Namibia	F.N Shindume et al. 2019	genotype/ line	Accession/ genotype
Fat	Pearl millet	L10P18	5.18		Namibia	F.N Shindume et al. 2019	genotype/ line	Accession/ genotype
Fat	Pearl millet	L5P11Rep2	5.77		Namibia	F.N Shindume et al. 2019	genotype/ line	Accession/ genotype
Fat	Pearl millet	L10P13Rep1	5.19		Namibia	F.N Shindume et al. 2019	genotype/ line	Accession/ genotype
Fat	Pearl millet	Dembi Millet	4.51		Sudan	Elsadig et al. 2016	genotype	Accession/ genotype
Fat	Pearl millet	Sudan II	4.34		Sudan	Elsadig et al. 2016	genotype	Accession/ genotype
Fat	Pearl millet	Ugandi	4.24		Sudan	Elsadig et al. 2016	genotype	Accession/ genotype
Fat	Pearl millet	Dembi Kabkabia	4.37		Sudan	Elsadig et al. 2016	genotype	Accession/ genotype
Fat	Pearl millet	Dembi Shangal Toby	4.52		Sudan	Elsadig et al. 2016	genotype	Accession/ genotype
Fat	Pearl millet	HSD10331	4.49		Sudan	Elsadig et al. 2016	genotype	Accession/ genotype
Fat	Pearl millet	HSD10392	4.52		Sudan	Elsadig et al. 2016	genotype	Accession/ genotype
Fat	Pearl millet	HSD10362	4.74		Sudan	Elsadig et al. 2016	genotype	Accession/ genotype
Fat	Pearl millet	SADC (Long)	4.65		Sudan	Elsadig et al. 2016	genotype	Accession/ genotype
Fat	Pearl millet	Dembi Sea	4.36		Sudan	Elsadig et al. 2016	genotype	Accession/ genotype
Fat	Pearl millet	SADC (Togo)	4.78		Sudan	Elsadig et al. 2016	genotype	Accession/ genotype
Fat	Pearl millet	HSD10313	4.79		Sudan	Elsadig et al. 2016	genotype	Accession/ genotype
Fat	Pearl millet	HSD7131	4.57		Sudan	Elsadig et al. 2016	genotype	Accession/ genotype
Fat	Pearl millet	HSD10318	4.66		Sudan	Elsadig et al. 2016	genotype	Accession/ genotype
Fat	Pearl millet	HSD7133	4.65		Sudan	Elsadig et al. 2016	genotype	Accession/ genotype
Fat	Pearl millet	HSD10292	4.65		Sudan	Elsadig et al. 2016	genotype	Accession/ genotype
Fat	Pearl millet	HSD55555	4.51		Sudan	Elsadig et al. 2016	genotype	Accession/ genotype
Fat	Pearl millet	HSD10293	4.57		Sudan	Elsadig et al. 2016	genotype	Accession/ genotype
Fat	Pearl millet	HSD7132	4.49		Sudan	Elsadig et al. 2016	genotype	Accession/ genotype
Fat	Pearl millet	HSD7135	4.51		Sudan	Elsadig et al. 2016	genotype	Accession/ genotype
Fat	Pearl millet	HSD10303	4.95		Sudan	Elsadig et al. 2016	genotype	Accession/ genotype
Fat	Pearl millet	HSD10319	4.32		Sudan	Elsadig et al. 2016	genotype	Accession/ genotype
Fat	Pearl millet	HSD7134	4.51		Sudan	Elsadig et al. 2016	genotype	Accession/ genotype
Fat	Pearl millet	HSD10376	4.65		Sudan	Elsadig et al. 2016	genotype	Accession/ genotype
Fat	Pearl millet	HSD10294	5.21		Sudan	Elsadig et al. 2016	genotype	Accession/ genotype
Fat	Pearl millet	HSD10309	4.48		Sudan	Elsadig et al. 2016	genotype	Accession/ genotype
Fat	Pearl millet	HSD10291	4.6		Sudan	Elsadig et al. 2016	genotype	Accession/ genotype
Fat	Pearl millet	HSD10354	4.77		Sudan	Elsadig et al. 2016	genotype	Accession/ genotype
Fat	Pearl millet	MCNELC	4.4		Sudan	Elsadig et al. 2016	genotype	Accession/ genotype
Fat	Pearl millet	Ashana	4.54		Sudan	Elsadig et al. 2016	genotype	Accession/ genotype
Fat	Proso millet	ANUL	3.32		Srilanka	Kumari et al. 2016	variety	variety
Fat	Proso millet	HAML	3.09		Srilanka	Kumari et al. 2016	variety	variety
Fat	Sorghum	RPASV-3	1.63		India	Chavan et al. 2015	variety	variety
Fat	Sorghum	Pandhari chikni	1.74		India	Chavan et al. 2015	variety	variety
Fat	Sorghum	Dadar local	1.9		India	Chavan et al. 2015	variety	variety
Fat	Sorghum	M-35-1	1.68		India	Chavan et al. 2015	variety	variety
Fat	Sorghum	Phule Revati	1.21		India	Chavan et al. 2015	variety	variety
Fat	Sorghum	PAN8625	2.71		South Africa	Mabelebele et al. 2015	variety	variety
Fat	Sorghum	PAN8816	3.13		South Africa	Mabelebele et al. 2015	variety	variety
Fat	Sorghum	NS5511	3.73		South Africa	Mabelebele et al. 2015	variety	variety
Fat	Sorghum	PAN8906	2.91		South Africa	Mabelebele et al. 2015	variety	variety
Fat	Sorghum	Hamra	4.33		Saudi Arabia	Mustafa et al. 2003	variety	variety
Fat	Sorghum	Shahla	3.58		Saudi Arabia	Mustafa et al. 2003	variety	variety
Fat	Sorghum	Baidha	4.47		Saudi Arabia	Mustafa et al. 2003	variety	variety
Fat	Sorghum	MR-Sorghum	4.7		Pakistan	F. Ahmad et al. 2018	variety	variety
Fat	Sorghum	Sandal Bar	3.3		Pakistan	F. Ahmad et al. 2018	variety	variety
Fat	Sorghum	Hegari	5.6		Pakistan	F. Ahmad et al. 2018	variety	variety
Fat	Sorghum	PC-1	3.9		Pakistan	F. Ahmad et al. 2018	variety	variety
Fat	Sorghum	JS-263	4.5		Pakistan	F. Ahmad et al. 2018	variety	variety
Fat	Sorghum	JS-2002	5.4		Pakistan	F. Ahmad et al. 2018	variety	variety
Fat	Sorghum	F-114	2.7		Pakistan	F. Ahmad et al. 2018	variety	variety
Fat	Sorghum	S. Bajra-2011	3.8		Pakistan	F. Ahmad et al. 2018	variety	variety
Fat	Sorghum	MB-87	3.7		Pakistan	F. Ahmad et al. 2018	variety	variety
Fat	Sorghum	GBK 44669	3.15		Kenya	Otieno et al. 2021	variety	variety
Fat	Sorghum	GBK 44672	2.95		Kenya	Otieno et al. 2021	variety	variety
Fat	Sorghum	GBK 44626	1.92		Kenya	Otieno et al. 2021	variety	variety
Fat	Sorghum	GBK004251	2.87		Kenya	Otieno et al. 2021	variety	variety
Fat	Sorghum	GBK 51843	3.55		Tanzania	Otieno et al. 2021	variety	variety
Fat	Sorghum	GBK 51759	3.03		Tanzania	Otieno et al. 2021	variety	variety
Fat	Sorghum	GBK 051855	4.23		Tanzania	Otieno et al. 2021	variety	variety
Fat	Sorghum	GBK 51737	2.65		Uganda	Otieno et al. 2021	variety	variety
Fat	Sorghum	GBK051746	3.24		Uganda	Otieno et al. 2021	variety	variety
Fat	Sorghum	GBK051744	2.07		Uganda	Otieno et al. 2021	variety	variety
Fat	Sorghum	C26	2.8		Western Kenya	Mugalavai et al. 2018	variety	variety
Fat	Sorghum	E97	3.41		Western Kenya	Mugalavai et al. 2018	variety	variety
Fat	Sorghum	E95A	3.08		Western Kenya	Mugalavai et al. 2018	variety	variety
Fat	Sorghum	Kensorg	2.34		Western Kenya	Mugalavai et al. 2018	variety	variety
Fat	Sorghum	E117	3.28		Western Kenya	Mugalavai et al. 2018	variety	variety
Fat	Sorghum	N68	3.06		Western Kenya	Mugalavai et al. 2018	variety	variety
Fat	Sorghum	N57	2.96		Western Kenya	Mugalavai et al. 2018	variety	variety
Fat	Sorghum	RV03	2.25		Italy	Poniteri et al. 2017	cultivar	variety	hybrids
Fat	Sorghum	RV05	2.93		Italy	Poniteri et al. 2017	cultivar	variety	hybrids
Fat	Sorghum	RV06	2.38		Italy	Poniteri et al. 2017	cultivar	variety	hybrids
Fat	Sorghum	RV07	2.66		Italy	Poniteri et al. 2017	cultivar	variety	hybrids
Fat	Sorghum	RV08	2.58		Italy	Poniteri et al. 2017	cultivar	variety	hybrids
Fat	Sorghum	BO1	3.57		Italy	Poniteri et al. 2017	cultivar	variety	hybrids
Fat	Tef	Adama	3.04		Ethiopia	Derib et al. 2018	variety	variety
Fat	Tef	Agirat	3.48		Ethiopia	Derib et al. 2018	variety	variety
Fat	Tef	Ametti	3.47		Ethiopia	Derib et al. 2018	variety	variety
Fat	Tef	Areriti	3.33		Ethiopia	Derib et al. 2018	variety	variety
Fat	Tef	Bolo Giorgis	3.38		Ethiopia	Derib et al. 2018	variety	variety
Fat	Tef	Bolo Silasie	3.11		Ethiopia	Derib et al. 2018	variety	variety
Fat	Tef	Chelle	3.26		Ethiopia	Derib et al. 2018	variety	variety
Fat	Tef	Kombolcha	3.18		Ethiopia	Derib et al. 2018	variety	variety
Fat	Tef	Korma	3.15		Ethiopia	Derib et al. 2018	variety	variety
Fat	Teff	Boset	2.75		Ethiopia	Abewa et al. 2020	genotype	Accession/ genotype
Fat	Teff	Dima	2.75		Ethiopia	Abewa et al. 2020	genotype	Accession/ genotype
Fat	Teff	Etsub	2.86		Ethiopia	Abewa et al. 2020	genotype	Accession/ genotype
Fat	Teff	Keytena	2.74		Ethiopia	Abewa et al. 2020	genotype	Accession/ genotype
Fat	Teff	Kora	2.84		Ethiopia	Abewa et al. 2020	genotype	Accession/ genotype
Fat	Teff	Magna	2.84		Ethiopia	Abewa et al. 2020	genotype	Accession/ genotype
Fat	Teff	Quncho	2.85		Ethiopia	Abewa et al. 2020	genotype	Accession/ genotype
Fat	Teff	Simada	2.67		Ethiopia	Abewa et al. 2020	genotype	Accession/ genotype
Fat	Teff	Tsedy	2.65		Ethiopia	Abewa et al. 2020	genotype	Accession/ genotype
Ash	Brown top millet	BTAVT6	8.62		India	Hemamalini et al. 2021	variety	variety
Ash	Finger millet	Boneya	1.8		Ethiopia	Adamassu et al. 2009	Improved variety	variety
Ash	Finger millet	Padet-1	2.41		Ethiopia	Adamassu et al. 2009	Improved variety	variety
Ash	Finger millet	PBL-1	2.85		Ethiopia	Adamassu et al. 2009	variety	variety
Ash	Finger millet	PBL-2	2.89		Ethiopia	Adamassu et al. 2009	variety	variety
Ash	Finger millet	PBL-3	2.84		Ethiopia	Adamassu et al. 2009	variety	variety
Ash	Finger millet	PBR-1	2.89		Ethiopia	Adamassu et al. 2009	variety	variety
Ash	Finger millet	PBR-2	3.32		Ethiopia	Adamassu et al. 2009	variety	variety
Ash	Finger millet	PBR-3	2.85		Ethiopia	Adamassu et al. 2009	variety	variety
Ash	Finger millet	Tadesse	2.45		Ethiopia	Adamassu et al. 2009	Improved variety	variety
Ash	Finger millet	GN 1	3.7		India	Nakarani et al. 2020	genotype	Accession/ genotype
Ash	Finger millet	GN 2	3.2		India	Nakarani et al. 2020	genotype	Accession/ genotype
Ash	Finger millet	GN 3	3.2		India	Nakarani et al. 2020	genotype	Accession/ genotype
Ash	Finger millet	GN 4	3.4		India	Nakarani et al. 2020	genotype	Accession/ genotype
Ash	Finger millet	GN 5	3.1		India	Nakarani et al. 2020	genotype	Accession/ genotype
Ash	Finger millet	GNN 6	3.2		India	Nakarani et al. 2020	genotype	Accession/ genotype
Ash	Finger millet	GNN 7	3.8		India	Nakarani et al. 2020	genotype	Accession/ genotype
Ash	Finger millet	WN 585	3.5		India	Nakarani et al. 2020	genotype	Accession/ genotype
Ash	Finger millet	WN 548	3.2		India	Nakarani et al. 2020	genotype	Accession/ genotype
Ash	Finger millet	WN 550	3.6		India	Nakarani et al. 2020	genotype	Accession/ genotype
Ash	Finger millet	Ateso	2.84		Machakos	Shiabiro et al. 2014	Genotype	Accession/ genotype
Ash	Finger millet	Gulu-E	2.75		Machakos	Shiabiro et al. 2014	Genotype	Accession/ genotype
Ash	Finger millet	FMV-1	2.812		Machakos	Shiabiro et al. 2014	Genotype	Accession/ genotype
Ash	Finger millet	KNE-479	2.85		Machakos	Shiabiro et al. 2014	Genotype	Accession/ genotype
Ash	Finger millet	KNE-1034	2.975		Machakos	Shiabiro et al. 2014	Genotype	Accession/ genotype
Ash	Finger millet	Nyaikuro	2.82		Machakos	Shiabiro et al. 2014	Genotype	Accession/ genotype
Ash	Finger millet	GBK043052	2.45		Kenya	Otieno et al. 2021	variety	variety
Ash	Finger millet	GBK043180	2.85		Kenya	Otieno et al. 2021	variety	variety
Ash	Finger millet	GBK043275	2.96		Kenya	Otieno et al. 2021	variety	variety
Ash	Finger millet	GBK51717	2.08		Uganda	Otieno et al. 2021	variety	variety
Ash	Finger millet	GBK051721	2.42		Uganda	Otieno et al. 2021	variety	variety
Ash	Finger millet	GBK051718	2.61		Uganda	Otieno et al. 2021	variety	variety
Ash	Finger millet	GBK 051725	4		Uganda	Otieno et al. 2021	variety	variety
Ash	Finger millet	GBK51705	2.45		Uganda	Otieno et al. 2021	variety	variety
Ash	Finger millet	CHEPNYALTET	3.28		Kenya	Otieno et al. 2021	variety	variety
Ash	Finger millet	GBK057855	3.41		Uganda	Otieno et al. 2021	variety	variety
Ash	Finger millet	MIRavi	2.72		Srilanka	Kumari et al. 2016	variety	variety
Ash	Finger millet	MIRav	1.83		Srilanka	Kumari et al. 2016	variety	variety
Ash	Finger millet	MIOsh	1.24		Srilanka	Kumari et al. 2016	variety	variety
Ash	Finger millet	MOL	1.24		Srilanka	Kumari et al. 2016	variety	variety
Ash	Finger millet	AML	0.73		Srilanka	Kumari et al. 2016	variety	variety
Ash	Finger millet	HAML	1.44		Srilanka	Kumari et al. 2016	variety	variety
Ash	Finger millet	WAL	1.69		Srilanka	Kumari et al. 2016	variety	variety
Ash	Finger millet	THAL	0.83		Srilanka	Kumari et al. 2016	variety	variety
Ash	Finger millet	ALUOsh	2.15		Srilanka	Kumari et al. 2016	variety	variety
Ash	Finger millet	NIKOsh	1.65		Srilanka	Kumari et al. 2016	variety	variety
Ash	Finger millet	BATRav	2.2		Srilanka	Kumari et al. 2016	variety	variety
Ash	Fonio	Finiba/Kassangara	3.5		Mali	Koreissi et al. 2013	variety	variety	Landraces
Ash	Fonio	Die`ni	7.4		Mali	Koreissi et al. 2013	variety	variety	Landraces
Ash	Fonio	Kassangara	4.3		Mali	Koreissi et al. 2013	variety	variety	Landraces
Ash	Fonio	Finiba	2.7		Mali	Koreissi et al. 2013	variety	variety	Landraces
Ash	Fonio	Petema	2.4		Mali	Koreissi et al. 2013	variety	variety	Landraces
Ash	Fonio	Pe´azo 1	2.1		Mali	Koreissi et al. 2013	variety	variety	Landraces
Ash	Fonio	Tioi	2.2		Mali	Koreissi et al. 2013	variety	variety	Landraces
Ash	Fonio	Peˆye	2.1		Mali	Koreissi et al. 2013	variety	variety	Landraces
Ash	Fonio	Tama	2.3		Mali	Koreissi et al. 2013	variety	variety	Landraces
Ash	Fonio	Tamatioi	2.1		Mali	Koreissi et al. 2013	variety	variety	Landraces
Ash	Fonio	Tamabe´	2.3		Mali	Koreissi et al. 2013	variety	variety	Landraces
Ash	Fonio	Finiba/Kassangara	3.5		Mali	Koreissi et al. 2013	variety	variety	Landraces
Ash	Fonio	Die`ni	7.4		Mali	Koreissi et al. 2013	variety	variety	Landraces
Ash	Fonio	Kassangara	4.3		Mali	Koreissi et al. 2013	variety	variety	Landraces
Ash	Fonio	Finiba	2.7		Mali	Koreissi et al. 2013	variety	variety	Landraces
Ash	Fonio	Petema	2.4		Mali	Koreissi et al. 2013	variety	variety	Landraces
Ash	Fonio	Pe´azo 1	2.1		Mali	Koreissi et al. 2013	variety	variety	Landraces
Ash	Fonio	Tioi	2.2		Mali	Koreissi et al. 2013	variety	variety	Landraces
Ash	Fonio	Peˆye	2.1		Mali	Koreissi et al. 2013	variety	variety	Landraces
Ash	Fonio	Tama	2.3		Mali	Koreissi et al. 2013	variety	variety	Landraces
Ash	Fonio	Tamatioi	2.1		Mali	Koreissi et al. 2013	variety	variety	Landraces
Ash	Fonio	Tamabe´	2.3		Mali	Koreissi et al. 2013	variety	variety	Landraces
Ash	Fonio	Pe´azo 2	3.9		Mali	Koreissi et al. 2013	variety	variety	Landraces
Ash	Foxtail millet	PALL	2.17		Srilanka	Kumari et al. 2016	variety	variety
Ash	Foxtail millet	HAML	1.54		Srilanka	Kumari et al. 2016	variety	variety
Ash	Foxtail millet	MOL	1.69		Srilanka	Kumari et al. 2016	variety	variety
Ash	Foxtail millet	JAFL	1.83		Srilanka	Kumari et al. 2016	variety	variety
Ash	Job's tears	Ngum	1.38		India	Luithui and Meera 2018	variety	variety
Ash	Job's tears	PTA-1	1.76		Indonesia	Ramadhan et al 2023	accession	Accession/ genotype
Ash	Job's tears	KKD-3	1.57		Indonesia	Ramadhan et al 2024	accession	Accession/ genotype
Ash	Job's tears	PH-4	1.63		Indonesia	Ramadhan et al 2025	accession	Accession/ genotype
Ash	Job's tears	BTA-2	1.18		Indonesia	Ramadhan et al 2026	accession	Accession/ genotype
Ash	Job's tears	GT-2	1.14		Indonesia	Ramadhan et al 2027	accession	Accession/ genotype
Ash	Job's tears	TJR-2	1.19		Indonesia	Ramadhan et al 2028	accession	Accession/ genotype
Ash	Pearl millet	ICMS-7703	1.47		India	Singh et al. 1987	variety	variety	normal protein content
Ash	Pearl millet	WC-C75	1.89		India	Singh et al. 1987	synthetic variety	variety	normal protein content
Ash	Pearl millet	B-816	1.94		India	Singh et al. 1987	inbred line	Accession/ genotype	high protein content
Ash	Pearl millet	WC-190	1.79		India	Singh et al. 1987	inbred line	Accession/ genotype	high protein content
Ash	Pearl millet	700112	2.15		India	Singh et al. 1987	inbred line	Accession/ genotype	high protein content
Ash	Pearl millet	Shanti	2.17		India	Kulthe et al. 2016	cultivar/ variety	variety
Ash	Pearl millet	Pioneer 86M64	2.05		India	Kulthe et al. 2016	cultivar/ variety	variety
Ash	Pearl millet	CGPMH-1	2.9		Canada	Mustafa et al. 2008	hybrid genotype	Accession/ genotype
Ash	Pearl millet	CGPMH-7	2.4		Canada	Mustafa et al. 2008	hybrid genotype	Accession/ genotype
Ash	Pearl millet	CGPMH-11	2.9		Canada	Mustafa et al. 2008	hybrid genotype	Accession/ genotype
Ash	Pearl millet	CGPMH-20	3.3		Canada	Mustafa et al. 2008	hybrid genotype	Accession/ genotype
Ash	Pearl millet	CGPMH-38	2.4		Canada	Mustafa et al. 2008	hybrid genotype	Accession/ genotype
Ash	Pearl millet	G122	2.5		USA	Chen at al. 1978	genotype	Accession/ genotype
Ash	Pearl millet	G123	2		USA	Chen at al. 1978	genotype	Accession/ genotype
Ash	Pearl millet	G125	2.2		USA	Chen at al. 1978	genotype	Accession/ genotype
Ash	Pearl millet	G126	2.1		USA	Chen at al. 1978	genotype	Accession/ genotype
Ash	Pearl millet	G131	1.7		USA	Chen at al. 1978	genotype	Accession/ genotype
Ash	Pearl millet	G133	1.9		USA	Chen at al. 1978	genotype	Accession/ genotype
Ash	Pearl millet	G134	1.7		USA	Chen at al. 1978	genotype	Accession/ genotype
Ash	Pearl millet	G136	1.5		USA	Chen at al. 1978	genotype	Accession/ genotype
Ash	Pearl millet	G137	2.4		USA	Chen at al. 1978	genotype	Accession/ genotype
Ash	Pearl millet	G142	1.7		USA	Chen at al. 1978	genotype	Accession/ genotype
Ash	Pearl millet	G143	2.1		USA	Chen at al. 1978	genotype	Accession/ genotype
Ash	Pearl millet	G146	1.7		USA	Chen at al. 1978	genotype	Accession/ genotype
Ash	Pearl millet	G148	2.1		USA	Chen at al. 1978	genotype	Accession/ genotype
Ash	Pearl millet	G150	2		USA	Chen at al. 1978	genotype	Accession/ genotype
Ash	Pearl millet	G157	2.3		USA	Chen at al. 1978	genotype	Accession/ genotype
Ash	Pearl millet	G159	1.9		USA	Chen at al. 1978	genotype	Accession/ genotype
Ash	Pearl millet	G161	2.3		USA	Chen at al. 1978	genotype	Accession/ genotype
Ash	Pearl millet	G162	1.9		USA	Chen at al. 1978	genotype	Accession/ genotype
Ash	Pearl millet	G165	1.6		USA	Chen at al. 1978	genotype	Accession/ genotype
Ash	Pearl millet	G166	1.6		USA	Chen at al. 1978	genotype	Accession/ genotype
Ash	Pearl millet	G167	1.7		USA	Chen at al. 1978	genotype	Accession/ genotype
Ash	Pearl millet	G168	1.7		USA	Chen at al. 1978	genotype	Accession/ genotype
Ash	Pearl millet	G169	1.6		USA	Chen at al. 1978	genotype	Accession/ genotype
Ash	Pearl millet	G170	2		USA	Chen at al. 1978	genotype	Accession/ genotype
Ash	Pearl millet	G172	2.1		USA	Chen at al. 1978	genotype	Accession/ genotype
Ash	Pearl millet	G175	1.8		USA	Chen at al. 1978	genotype	Accession/ genotype
Ash	Pearl millet	G176	1.9		USA	Chen at al. 1978	genotype	Accession/ genotype
Ash	Pearl millet	G179	2		USA	Chen at al. 1978	genotype	Accession/ genotype
Ash	Pearl millet	G181	2.1		USA	Chen at al. 1978	genotype	Accession/ genotype
Ash	Pearl millet	G190	1.9		USA	Chen at al. 1978	genotype	Accession/ genotype
Ash	Pearl millet	G191	1.9		USA	Chen at al. 1978	genotype	Accession/ genotype
Ash	Pearl millet	G192	2.3		USA	Chen at al. 1978	genotype	Accession/ genotype
Ash	Pearl millet	G194	2		USA	Chen at al. 1978	genotype	Accession/ genotype
Ash	Pearl millet	G195	2.4		USA	Chen at al. 1978	genotype	Accession/ genotype
Ash	Pearl millet	G197	1.5		USA	Chen at al. 1978	genotype	Accession/ genotype
Ash	Pearl millet	Ka	1.87		Namibia	F.N Shindume et al. 2019	genotype/ line	Accession/ genotype
Ash	Pearl millet	L5AP18	2.23		Namibia	F.N Shindume et al. 2019	genotype/ line	Accession/ genotype
Ash	Pearl millet	L7AP1A	3.18		Namibia	F.N Shindume et al. 2019	genotype/ line	Accession/ genotype
Ash	Pearl millet	R6P1-1	1.77		Namibia	F.N Shindume et al. 2019	genotype/ line	Accession/ genotype
Ash	Pearl millet	RP95	1.99		Namibia	F.N Shindume et al. 2019	genotype/ line	Accession/ genotype
Ash	Pearl millet	L8P5Rep2	2.12		Namibia	F.N Shindume et al. 2019	genotype/ line	Accession/ genotype
Ash	Pearl millet	L8P5Rep1	2.59		Namibia	F.N Shindume et al. 2019	genotype/ line	Accession/ genotype
Ash	Pearl millet	Oka2	1.94		Namibia	F.N Shindume et al. 2019	genotype/ line	Accession/ genotype
Ash	Pearl millet	L3P5	1.91		Namibia	F.N Shindume et al. 2019	genotype/ line	Accession/ genotype
Ash	Pearl millet	L4P1	1.96		Namibia	F.N Shindume et al. 2019	genotype/ line	Accession/ genotype
Ash	Pearl millet	L8P12	2.03		Namibia	F.N Shindume et al. 2019	genotype/ line	Accession/ genotype
Ash	Pearl millet	L10P18	4.25		Namibia	F.N Shindume et al. 2019	genotype/ line	Accession/ genotype
Ash	Pearl millet	L5P11Rep2	5.16		Namibia	F.N Shindume et al. 2019	genotype/ line	Accession/ genotype
Ash	Pearl millet	L10P13Rep1	2.19		Namibia	F.N Shindume et al. 2019	genotype/ line	Accession/ genotype
Ash	Pearl millet	Dembi Millet	1.53		Sudan	Elsadig et al. 2016	genotype	Accession/ genotype
Ash	Pearl millet	Sudan II	1.66		Sudan	Elsadig et al. 2016	genotype	Accession/ genotype
Ash	Pearl millet	Ugandi	1.35		Sudan	Elsadig et al. 2016	genotype	Accession/ genotype
Ash	Pearl millet	Dembi Kabkabia	1.47		Sudan	Elsadig et al. 2016	genotype	Accession/ genotype
Ash	Pearl millet	Dembi Shangal Toby	1.6		Sudan	Elsadig et al. 2016	genotype	Accession/ genotype
Ash	Pearl millet	HSD10331	1.53		Sudan	Elsadig et al. 2016	genotype	Accession/ genotype
Ash	Pearl millet	HSD10392	1.44		Sudan	Elsadig et al. 2016	genotype	Accession/ genotype
Ash	Pearl millet	HSD10362	1.53		Sudan	Elsadig et al. 2016	genotype	Accession/ genotype
Ash	Pearl millet	SADC (Long)	1.46		Sudan	Elsadig et al. 2016	genotype	Accession/ genotype
Ash	Pearl millet	Dembi Sea	1.58		Sudan	Elsadig et al. 2016	genotype	Accession/ genotype
Ash	Pearl millet	SADC (Togo)	1.48		Sudan	Elsadig et al. 2016	genotype	Accession/ genotype
Ash	Pearl millet	HSD10313	1.51		Sudan	Elsadig et al. 2016	genotype	Accession/ genotype
Ash	Pearl millet	HSD7131	1.48		Sudan	Elsadig et al. 2016	genotype	Accession/ genotype
Ash	Pearl millet	HSD10318	1.7		Sudan	Elsadig et al. 2016	genotype	Accession/ genotype
Ash	Pearl millet	HSD7133	1.48		Sudan	Elsadig et al. 2016	genotype	Accession/ genotype
Ash	Pearl millet	HSD10292	1.61		Sudan	Elsadig et al. 2016	genotype	Accession/ genotype
Ash	Pearl millet	HSD55555	1.66		Sudan	Elsadig et al. 2016	genotype	Accession/ genotype
Ash	Pearl millet	HSD10293	1.55		Sudan	Elsadig et al. 2016	genotype	Accession/ genotype
Ash	Pearl millet	HSD7132	1.46		Sudan	Elsadig et al. 2016	genotype	Accession/ genotype
Ash	Pearl millet	HSD7135	1.68		Sudan	Elsadig et al. 2016	genotype	Accession/ genotype
Ash	Pearl millet	HSD10303	1.48		Sudan	Elsadig et al. 2016	genotype	Accession/ genotype
Ash	Pearl millet	HSD10319	1.7		Sudan	Elsadig et al. 2016	genotype	Accession/ genotype
Ash	Pearl millet	HSD7134	1.55		Sudan	Elsadig et al. 2016	genotype	Accession/ genotype
Ash	Pearl millet	HSD10376	1.25		Sudan	Elsadig et al. 2016	genotype	Accession/ genotype
Ash	Pearl millet	HSD10294	1.7		Sudan	Elsadig et al. 2016	genotype	Accession/ genotype
Ash	Pearl millet	HSD10309	1.52		Sudan	Elsadig et al. 2016	genotype	Accession/ genotype
Ash	Pearl millet	HSD10291	1.5		Sudan	Elsadig et al. 2016	genotype	Accession/ genotype
Ash	Pearl millet	HSD10354	1.53		Sudan	Elsadig et al. 2016	genotype	Accession/ genotype
Ash	Pearl millet	MCNELC	1.41		Sudan	Elsadig et al. 2016	genotype	Accession/ genotype
Ash	Pearl millet	Ashana	1.54		Sudan	Elsadig et al. 2016	genotype	Accession/ genotype
Ash	Proso millet	ANUL	2.26		Srilanka	Kumari et al. 2016	variety	variety
Ash	Proso millet	HAML	2.17		Srilanka	Kumari et al. 2016	variety	variety
Ash	Sorghum	RPASV-3	2.36		India	Chavan et al. 2015	variety	variety
Ash	Sorghum	Pandhari chikni	2.84		India	Chavan et al. 2015	variety	variety
Ash	Sorghum	Dadar local	2.49		India	Chavan et al. 2015	variety	variety
Ash	Sorghum	M-35-1	2.33		India	Chavan et al. 2015	variety	variety
Ash	Sorghum	Phule Revati	2.47		India	Chavan et al. 2015	variety	variety
Ash	Sorghum	PAN8625	1.5		South Africa	Mabelebele et al. 2015	variety	variety
Ash	Sorghum	PAN8816	1.3		South Africa	Mabelebele et al. 2015	variety	variety
Ash	Sorghum	NS5511	1.5		South Africa	Mabelebele et al. 2015	variety	variety
Ash	Sorghum	PAN8906	1.5		South Africa	Mabelebele et al. 2015	variety	variety
Ash	Sorghum	Hamra	1.94		Saudi Arabia	Mustafa et al. 2003	variety	variety
Ash	Sorghum	Shahla	1.97		Saudi Arabia	Mustafa et al. 2003	variety	variety
Ash	Sorghum	Baidha	1.9		Saudi Arabia	Mustafa et al. 2003	variety	variety
Ash	Sorghum	MR-Sorghum	2.1		Pakistan	F. Ahmad et al. 2018	variety	variety
Ash	Sorghum	Sandal Bar	2.7		Pakistan	F. Ahmad et al. 2018	variety	variety
Ash	Sorghum	Hegari	3.3		Pakistan	F. Ahmad et al. 2018	variety	variety
Ash	Sorghum	PC-1	3		Pakistan	F. Ahmad et al. 2018	variety	variety
Ash	Sorghum	JS-263	1.6		Pakistan	F. Ahmad et al. 2018	variety	variety
Ash	Sorghum	JS-2002	2.6		Pakistan	F. Ahmad et al. 2018	variety	variety
Ash	Sorghum	F-114	1.8		Pakistan	F. Ahmad et al. 2018	variety	variety
Ash	Sorghum	S. Bajra-2011	2		Pakistan	F. Ahmad et al. 2018	variety	variety
Ash	Sorghum	MB-87	1.5		Pakistan	F. Ahmad et al. 2018	variety	variety
Ash	Sorghum	GBK 44669	2.41		Kenya	Otieno et al. 2021	variety	variety
Ash	Sorghum	GBK 44672	2.33		Kenya	Otieno et al. 2021	variety	variety
Ash	Sorghum	GBK 44626	1.75		Kenya	Otieno et al. 2021	variety	variety
Ash	Sorghum	GBK004251	1.78		Kenya	Otieno et al. 2021	variety	variety
Ash	Sorghum	GBK 51843	2.61		Tanzania	Otieno et al. 2021	variety	variety
Ash	Sorghum	GBK 51759	2.17		Tanzania	Otieno et al. 2021	variety	variety
Ash	Sorghum	GBK 051855	3.45		Tanzania	Otieno et al. 2021	variety	variety
Ash	Sorghum	GBK 51737	2.82		Uganda	Otieno et al. 2021	variety	variety
Ash	Sorghum	GBK051746	1.76		Uganda	Otieno et al. 2021	variety	variety
Ash	Sorghum	GBK051744	2.41		Uganda	Otieno et al. 2021	variety	variety
Ash	Sorghum	C26	1.41		Western Kenya	Mugalavai et al. 2018	variety	variety
Ash	Sorghum	E97	1.64		Western Kenya	Mugalavai et al. 2018	variety	variety
Ash	Sorghum	E95A	1.48		Western Kenya	Mugalavai et al. 2018	variety	variety
Ash	Sorghum	Kensorg	1.33		Western Kenya	Mugalavai et al. 2018	variety	variety
Ash	Sorghum	E117	1.5		Western Kenya	Mugalavai et al. 2018	variety	variety
Ash	Sorghum	N68	1.75		Western Kenya	Mugalavai et al. 2018	variety	variety
Ash	Sorghum	N57	1.62		Western Kenya	Mugalavai et al. 2018	variety	variety
Ash	Sorghum	RV03	2.1		Italy	Poniteri et al. 2017	cultivar	variety	hybrids
Ash	Sorghum	RV05	2.5		Italy	Poniteri et al. 2017	cultivar	variety	hybrids
Ash	Sorghum	RV06	2.1		Italy	Poniteri et al. 2017	cultivar	variety	hybrids
Ash	Sorghum	RV07	1.9		Italy	Poniteri et al. 2017	cultivar	variety	hybrids
Ash	Sorghum	RV08	2.1		Italy	Poniteri et al. 2017	cultivar	variety	hybrids
Ash	Sorghum	BO1	2.2		Italy	Poniteri et al. 2017	cultivar	variety	hybrids
Ash	Tef	Adama	2.62		Ethiopia	Derib et al. 2018	variety	variety
Ash	Tef	Agirat	2.36		Ethiopia	Derib et al. 2018	variety	variety
Ash	Tef	Ametti	2.41		Ethiopia	Derib et al. 2018	variety	variety
Ash	Tef	Areriti	2.13		Ethiopia	Derib et al. 2018	variety	variety
Ash	Tef	Bolo Giorgis	2.59		Ethiopia	Derib et al. 2018	variety	variety
Ash	Tef	Bolo Silasie	2.44		Ethiopia	Derib et al. 2018	variety	variety
Ash	Tef	Chelle	2.21		Ethiopia	Derib et al. 2018	variety	variety
Ash	Tef	Kombolcha	2.44		Ethiopia	Derib et al. 2018	variety	variety
Ash	Tef	Korma	3.22		Ethiopia	Derib et al. 2018	variety	variety
Fibre	Barnyard millet	VL21	29.8	Total Dietary Fiber	India	Panwar et al. 2016	variety	variety
Fibre	Barnyard millet	VL29	31.7	Total Dietary Fiber	India	Panwar et al. 2016	variety	variety
Fibre	Barnyard millet	VL 172	28.29	Total Dietary Fiber	India	Panwar et al. 2016	variety	variety
Fibre	Barnyard millet	VL207	23.25	Total Dietary Fiber	India	Panwar et al. 2016	variety	variety
Fibre	Barnyard millet	PRJ1	24.37	Total Dietary Fiber	India	Panwar et al. 2016	variety	variety
Fibre	Brown top millet	BTAVT6	16.08	Crude Fiber	India	Hemamalini et al. 2021	variety	variety
Fibre	Brown top millet	IC 606693	7.99	Crude Fiber	India	Niharika et al 2020	genotype	genotype/accession
Fibre	Brown top millet	IC 613546	7.68	Crude Fiber	India	Niharika et al 2021	genotype	genotype/accession
Fibre	Brown top millet	IC 613547	7.75	Crude Fiber	India	Niharika et al 2022	genotype	genotype/accession
Fibre	Brown top millet	IC 613548	7.62	Crude Fiber	India	Niharika et al 2023	genotype	genotype/accession
Fibre	Brown top millet	IC 613549	6.72	Crude Fiber	India	Niharika et al 2024	genotype	genotype/accession
Fibre	Brown top millet	IC 613550	8.61	Crude Fiber	India	Niharika et al 2025	genotype	genotype/accession
Fibre	Brown top millet	IC 613551	7.19	Crude Fiber	India	Niharika et al 2026	genotype	genotype/accession
Fibre	Brown top millet	IC 613552	8.37	Crude Fiber	India	Niharika et al 2027	genotype	genotype/accession
Fibre	Brown top millet	IC 613553	8.47	Crude Fiber	India	Niharika et al 2028	genotype	genotype/accession
Fibre	Brown top millet	IC 613554	9.87	Crude Fiber	India	Niharika et al 2029	genotype	genotype/accession
Fibre	Brown top millet	IC 613555	9.36	Crude Fiber	India	Niharika et al 2030	genotype	genotype/accession
Fibre	Brown top millet	IC 613556	8.76	Crude Fiber	India	Niharika et al 2031	genotype	genotype/accession
Fibre	Brown top millet	IC 613557	8.69	Crude Fiber	India	Niharika et al 2032	genotype	genotype/accession
Fibre	Brown top millet	IC 613558	9.71	Crude Fiber	India	Niharika et al 2033	genotype	genotype/accession
Fibre	Brown top millet	IC 613559	7.81	Crude Fiber	India	Niharika et al 2034	genotype	genotype/accession
Fibre	Brown top millet	IC 613560	8.34	Crude Fiber	India	Niharika et al 2035	genotype	genotype/accession
Fibre	Brown top millet	IC 613561	8.68	Crude Fiber	India	Niharika et al 2036	genotype	genotype/accession
Fibre	Brown top millet	IC 613562	8.8	Crude Fiber	India	Niharika et al 2037	genotype	genotype/accession
Fibre	Brown top millet	IC 617952	7.75	Crude Fiber	India	Niharika et al 2038	genotype	genotype/accession
Fibre	Brown top millet	IC 617953	7.52	Crude Fiber	India	Niharika et al 2039	genotype	genotype/accession
Fibre	Brown top millet	IC 617954	7.57	Crude Fiber	India	Niharika et al 2040	genotype	genotype/accession
Fibre	Brown top millet	IC 617955	6.5	Crude Fiber	India	Niharika et al 2041	genotype	genotype/accession
Fibre	Brown top millet	IC 617956	8.78	Crude Fiber	India	Niharika et al 2042	genotype	genotype/accession
Fibre	Brown top millet	IC 617957	7.73	Crude Fiber	India	Niharika et al 2043	genotype	genotype/accession
Fibre	Brown top millet	IC 617958	7.12	Crude Fiber	India	Niharika et al 2044	genotype	genotype/accession
Fibre	Brown top millet	IC 617959	7.31	Crude Fiber	India	Niharika et al 2045	genotype	genotype/accession
Fibre	Brown top millet	IC 617960	7.76	Crude Fiber	India	Niharika et al 2046	genotype	genotype/accession
Fibre	Brown top millet	IC 617961	8.57	Crude Fiber	India	Niharika et al 2047	genotype	genotype/accession
Fibre	Brown top millet	IC 617962	7.63	Crude Fiber	India	Niharika et al 2048	genotype	genotype/accession
Fibre	Brown top millet	28 bijapur collection	7.11	Crude Fiber	India	Niharika et al 2049	genotype	genotype/accession
Fibre	Finger millet	VL146	17.26	Total Dietary Fiber	India	Panwar et al. 2016	variety	variety
Fibre	Finger millet	VL149	17.31	Total Dietary Fiber	India	Panwar et al. 2016	variety	variety
Fibre	Finger millet	VL204	17.55	Total Dietary Fiber	India	Panwar et al. 2016	variety	variety
Fibre	Finger millet	VL315	18.06	Total Dietary Fiber	India	Panwar et al. 2016	variety	variety
Fibre	Finger millet	VL324	16.28	Total Dietary Fiber	India	Panwar et al. 2016	variety	variety
Fibre	Finger millet	GN 1	3.8	Crude Fiber	India	Nakarani et al. 2020	genotype	Accession/ genotype
Fibre	Finger millet	GN 2	3.6	Crude Fiber	India	Nakarani et al. 2020	genotype	Accession/ genotype
Fibre	Finger millet	GN 3	3.7	Crude Fiber	India	Nakarani et al. 2020	genotype	Accession/ genotype
Fibre	Finger millet	GN 4	3.8	Crude Fiber	India	Nakarani et al. 2020	genotype	Accession/ genotype
Fibre	Finger millet	GN 5	3.5	Crude Fiber	India	Nakarani et al. 2020	genotype	Accession/ genotype
Fibre	Finger millet	GNN 6	3.5	Crude Fiber	India	Nakarani et al. 2020	genotype	Accession/ genotype
Fibre	Finger millet	GNN 7	3.5	Crude Fiber	India	Nakarani et al. 2020	genotype	Accession/ genotype
Fibre	Finger millet	WN 585	3.1	Crude Fiber	India	Nakarani et al. 2020	genotype	Accession/ genotype
Fibre	Finger millet	WN 548	3.3	Crude Fiber	India	Nakarani et al. 2020	genotype	Accession/ genotype
Fibre	Finger millet	WN 550	3.5	Crude Fiber	India	Nakarani et al. 2020	genotype	Accession/ genotype
Fibre	Finger millet	Ateso	8.48	Crude Fiber	Machakos	Shiabiro et al. 2014	genotype	Accession/ genotype
Fibre	Finger millet	Gulu-E	6.53	Crude Fiber	Machakos	Shiabiro et al. 2014	Genotype	Accession/ genotype
Fibre	Finger millet	FMV-1	7	Crude Fiber	Machakos	Shiabiro et al. 2014	Genotype	Accession/ genotype
Fibre	Finger millet	KNE-479	7.84	Crude Fiber	Machakos	Shiabiro et al. 2014	Genotype	Accession/ genotype
Fibre	Finger millet	KNE-1034	6.53	Crude Fiber	Machakos	Shiabiro et al. 2014	Genotype	Accession/ genotype
Fibre	Finger millet	Nyaikuro	8.59	Crude Fiber	Machakos	Shiabiro et al. 2014	Genotype	Accession/ genotype
Fibre	Finger millet	CH1	4	Crude Fiber	Tunisinia	Bachar et al.2013	Accession	Accession/ genotype
Fibre	Finger millet	CH2	3.57	Crude Fiber	Tunisinia	Bachar et al.2013	Accession	Accession/ genotype
Fibre	Finger millet	CH3	3.34	Crude Fiber	Tunisinia	Bachar et al.2013	Accession	Accession/ genotype
Fibre	Finger millet	CH4	3.72	Crude Fiber	Tunisinia	Bachar et al.2013	Accession	Accession/ genotype
Fibre	Finger millet	CH5	5.04	Crude Fiber	Tunisinia	Bachar et al.2013	Accession	Accession/ genotype
Fibre	Finger millet	CH6	6.78	Crude Fiber	Tunisinia	Bachar et al.2013	Accession	Accession/ genotype
Fibre	Finger millet	CH7	9.06	Crude Fiber	Tunisinia	Bachar et al.2013	Accession	Accession/ genotype
Fibre	Finger millet	CH8	3.6	Crude Fiber	Tunisinia	Bachar et al.2013	Accession	Accession/ genotype
Fibre	Finger millet	CH9	4.95	Crude Fiber	Tunisinia	Bachar et al.2013	Accession	Accession/ genotype
Fibre	Finger millet	CH10	0.93	Crude Fiber	Tunisinia	Bachar et al.2013	Accession	Accession/ genotype
Fibre	Finger millet	CH11	3.65	Crude Fiber	Tunisinia	Bachar et al.2013	Accession	Accession/ genotype
Fibre	Finger millet	E1	3.06	Crude Fiber	Tunisinia	Bachar et al.2013	Accession	Accession/ genotype
Fibre	Finger millet	E2	2.96	Crude Fiber	Tunisinia	Bachar et al.2013	Accession	Accession/ genotype
Fibre	Finger millet	E3	3.16	Crude Fiber	Tunisinia	Bachar et al.2013	Accession	Accession/ genotype
Fibre	Finger millet	B1	3.67	Crude Fiber	Tunisinia	Bachar et al.2013	Accession	Accession/ genotype
Fibre	Finger millet	B2	3.2	Crude Fiber	Tunisinia	Bachar et al.2013	Accession	Accession/ genotype
Fibre	Finger millet	B3	3.59	Crude Fiber	Tunisinia	Bachar et al.2013	Accession	Accession/ genotype
Fibre	Finger millet	B4	3.8	Crude Fiber	Tunisinia	Bachar et al.2013	Accession	Accession/ genotype
Fibre	Finger millet	GH1	3.56	Crude Fiber	Tunisinia	Bachar et al.2013	Accession	Accession/ genotype
Fibre	Finger millet	GH2	3.8	Crude Fiber	Tunisinia	Bachar et al.2013	Accession	Accession/ genotype
Fibre	Finger millet	GH3	3.09	Crude Fiber	Tunisinia	Bachar et al.2013	Accession	Accession/ genotype
Fibre	Finger millet	GH4	3.8	Crude Fiber	Tunisinia	Bachar et al.2013	Accession	Accession/ genotype
Fibre	Finger millet	GH5	2.78	Crude Fiber	Tunisinia	Bachar et al.2013	Accession	Accession/ genotype
Fibre	Finger millet	GH6	3.52	Crude Fiber	Tunisinia	Bachar et al.2013	Accession	Accession/ genotype
Fibre	Finger millet	GH7	3.21	Crude Fiber	Tunisinia	Bachar et al.2013	Accession	Accession/ genotype
Fibre	Finger millet	GH8	3.25	Crude Fiber	Tunisinia	Bachar et al.2013	Accession	Accession/ genotype
Fibre	Finger millet	GH9	3.81	Crude Fiber	Tunisinia	Bachar et al.2013	Accession	Accession/ genotype
Fibre	Finger millet	GH11	10.01	Crude Fiber	Tunisinia	Bachar et al.2013	Accession	Accession/ genotype
Fibre	Finger millet	GH12	3.63	Crude Fiber	Tunisinia	Bachar et al.2013	Accession	Accession/ genotype
Fibre	Finger millet	GBK043052	9.1	Crude Fiber	Kenya	Otieno et al. 2021	variety	variety
Fibre	Finger millet	GBK043180	8.6	Crude Fiber	Kenya	Otieno et al. 2021	variety	variety
Fibre	Finger millet	GBK043275	8.76	Crude Fiber	Kenya	Otieno et al. 2021	variety	variety
Fibre	Finger millet	GBK51717	10.96	Crude Fiber	Uganda	Otieno et al. 2021	variety	variety
Fibre	Finger millet	GBK051718	7.64	Crude Fiber	Uganda	Otieno et al. 2021	variety	variety
Fibre	Finger millet	GBK 051725	9.2	Crude Fiber	Uganda	Otieno et al. 2021	variety	variety
Fibre	Finger millet	GBK51705	10.97	Crude Fiber	Uganda	Otieno et al. 2021	variety	variety
Fibre	Finger millet	CHEPNYALTET	8.48	Crude Fiber	Kenya	Otieno et al. 2021	variety	variety
Fibre	Finger millet	GBK057855	10.6	Crude Fiber	Uganda	Otieno et al. 2021	variety	variety
Fibre	Finger millet	MIRavi	3.41	Crude Fiber	Srilanka	Kumari et al. 2016	variety	variety
Fibre	Finger millet	MIRav	3.04	Crude Fiber	Srilanka	Kumari et al. 2016	variety	variety
Fibre	Finger millet	MIOsh	2.7	Crude Fiber	Srilanka	Kumari et al. 2016	variety	variety
Fibre	Finger millet	MOL	3.43	Crude Fiber	Srilanka	Kumari et al. 2016	variety	variety
Fibre	Finger millet	AML	3.59	Crude Fiber	Srilanka	Kumari et al. 2016	variety	variety
Fibre	Finger millet	HAML	2.61	Crude Fiber	Srilanka	Kumari et al. 2016	variety	variety
Fibre	Finger millet	WAL	3.45	Crude Fiber	Srilanka	Kumari et al. 2016	variety	variety
Fibre	Finger millet	THAL	3.49	Crude Fiber	Srilanka	Kumari et al. 2016	variety	variety
Fibre	Finger millet	ALUOsh	3	Crude Fiber	Srilanka	Kumari et al. 2016	variety	variety
Fibre	Finger millet	NIKOsh	2.22	Crude Fiber	Srilanka	Kumari et al. 2016	variety	variety
Fibre	Finger millet	BATRav	3.01	Crude Fiber	Srilanka	Kumari et al. 2016	variety	variety
Fibre	Finger millet	GPU-28	3.92	Crude Fiber	India	Patil et al. 2019	Genotype	Accession/ genotype
Fibre	Finger millet	GPU-48	3.85	Crude Fiber	India	Patil et al. 2019	Genotype	Accession/ genotype
Fibre	Finger millet	GPU-67	3.82	Crude Fiber	India	Patil et al. 2019	Genotype	Accession/ genotype
Fibre	Finger millet	VL-149	4.05	Crude Fiber	India	Patil et al. 2019	Genotype	Accession/ genotype
Fibre	Finger millet	PR-202	4.15	Crude Fiber	India	Patil et al. 2019	Genotype	Accession/ genotype
Fibre	Finger millet	RAU-8	4.12	Crude Fiber	India	Patil et al. 2019	Genotype	Accession/ genotype
Fibre	Finger millet	VR-708	4.1	Crude Fiber	India	Patil et al. 2019	Genotype	Accession/ genotype
Fibre	Finger millet	KOPN-235	4.12	Crude Fiber	India	Patil et al. 2019	Genotype	Accession/ genotype
Fibre	Finger millet	KMR-204	4	Crude Fiber	India	Patil et al. 2019	Genotype	Accession/ genotype
Fibre	Finger millet	L-5	3.87	Crude Fiber	India	Patil et al. 2019	Genotype	Accession/ genotype
Fibre	Finger millet	MR-6	4.04	Crude Fiber	India	Patil et al. 2019	Genotype	Accession/ genotype
Fibre	Finger millet	WN-259	3.9	Crude Fiber	India	Patil et al. 2019	Genotype	Accession/ genotype
Fibre	Finger millet	GPU-45	3.82	Crude Fiber	India	Patil et al. 2019	Genotype	Accession/ genotype
Fibre	Finger millet	GPU-66	3.82	Crude Fiber	India	Patil et al. 2019	Genotype	Accession/ genotype
Fibre	Finger millet	TNAU 1022	3.77	Crude Fiber	India	Patil et al. 2019	Genotype	Accession/ genotype
Fibre	Finger millet	DM 7	3.97	Crude Fiber	India	Patil et al. 2019	Genotype	Accession/ genotype
Fibre	Finger millet	PPP 2885	4.15	Crude Fiber	India	Patil et al. 2019	Genotype	Accession/ genotype
Fibre	Finger millet	OEB 530	4.01	Crude Fiber	India	Patil et al. 2019	Genotype	Accession/ genotype
Fibre	Finger millet	GE-205	3.95	Crude Fiber	India	Patil et al. 2019	Genotype	Accession/ genotype
Fibre	Finger millet	GE-406	3.82	Crude Fiber	India	Patil et al. 2019	Genotype	Accession/ genotype
Fibre	Finger millet	PES-110	3.8	Crude Fiber	India	Patil et al. 2019	Genotype	Accession/ genotype
Fibre	Finger millet	MR-1	4	Crude Fiber	India	Patil et al. 2019	Genotype	Accession/ genotype
Fibre	Finger millet	GE-942	4.05	Crude Fiber	India	Patil et al. 2019	Genotype	Accession/ genotype
Fibre	Finger millet	WWN-8	3.8	Crude Fiber	India	Patil et al. 2019	Genotype	Accession/ genotype
Fibre	Finger millet	WWN-9	3.82	Crude Fiber	India	Patil et al. 2019	Genotype	Accession/ genotype
Fibre	Finger millet	WWN-10	3.68	Crude Fiber	India	Patil et al. 2019	Genotype	Accession/ genotype
Fibre	Finger millet	WWN-11	3.8	Crude Fiber	India	Patil et al. 2019	Genotype	Accession/ genotype
Fibre	Finger millet	WWN-13	3.85	Crude Fiber	India	Patil et al. 2019	Genotype	Accession/ genotype
Fibre	Finger millet	BR 6	3.98	Crude Fiber	India	Patil et al. 2019	Genotype	Accession/ genotype
Fibre	Finger millet	GPU 80	4.07	Crude Fiber	India	Patil et al. 2019	Genotype	Accession/ genotype
Fibre	Finger millet	GN-1	4	Crude Fiber	India	Patil et al. 2019	Genotype	Accession/ genotype
Fibre	Finger millet	GN-2	3.85	Crude Fiber	India	Patil et al. 2019	Genotype	Accession/ genotype
Fibre	Finger millet	GN-3	3.98	Crude Fiber	India	Patil et al. 2019	Genotype	Accession/ genotype
Fibre	Finger millet	GN-4	4.05	Crude Fiber	India	Patil et al. 2019	Genotype	Accession/ genotype
Fibre	Finger millet	GN-5	3.97	Crude Fiber	India	Patil et al. 2019	Genotype	Accession/ genotype
Fibre	Finger millet	GPU-28	4.12	Crude Fiber	India	Patil et al. 2019	Genotype	Accession/ genotype
Fibre	Finger millet	GPU-48	4.03	Crude Fiber	India	Patil et al. 2019	Genotype	Accession/ genotype
Fibre	Fonio	Finiba/Kassangara	19.1	Total Dietary Fiber	Mali	Koreissi et al. 2013	variety	variety	Landraces
Fibre	Fonio	Die`ni	19.3	Total Dietary Fiber	Mali	Koreissi et al. 2013	variety	variety	Landraces
Fibre	Fonio	Kassangara	17.2	Total Dietary Fiber	Mali	Koreissi et al. 2013	variety	variety	Landraces
Fibre	Fonio	Finiba	17.3	Total Dietary Fiber	Mali	Koreissi et al. 2013	variety	variety	Landraces
Fibre	Fonio	Petema	20.1	Total Dietary Fiber	Mali	Koreissi et al. 2013	variety	variety	Landraces
Fibre	Fonio	Pe´azo 1	20.7	Total Dietary Fiber	Mali	Koreissi et al. 2013	variety	variety	Landraces
Fibre	Fonio	Tioi	19.6	Total Dietary Fiber	Mali	Koreissi et al. 2013	variety	variety	Landraces
Fibre	Fonio	Peˆye	17.4	Total Dietary Fiber	Mali	Koreissi et al. 2013	variety	variety	Landraces
Fibre	Fonio	Tama	17.9	Total Dietary Fiber	Mali	Koreissi et al. 2013	variety	variety	Landraces
Fibre	Fonio	Tamatioi	16.2	Total Dietary Fiber	Mali	Koreissi et al. 2013	variety	variety	Landraces
Fibre	Fonio	Tamabe´	17.9	Total Dietary Fiber	Mali	Koreissi et al. 2013	variety	variety	Landraces
Fibre	Fonio	Pe´azo 2	15.7	Total Dietary Fiber	Mali	Koreissi et al. 2013	variety	variety	Landraces
Fibre	Foxtail millet	DHF 26	2.31	Crude Fiber	India	Brunda et al. 2017	genotype	Accession/ genotype
Fibre	Foxtail millet	GS 2109	2.28	Crude Fiber	India	Brunda et al. 2017	genotype	Accession/ genotype
Fibre	Foxtail millet	DHF 2	2.24	Crude Fiber	India	Brunda et al. 2017	genotype	Accession/ genotype
Fibre	Foxtail millet	DHF 1	2.23	Crude Fiber	India	Brunda et al. 2017	genotype	Accession/ genotype
Fibre	Foxtail millet	DHF 29	2.23	Crude Fiber	India	Brunda et al. 2017	genotype	Accession/ genotype
Fibre	Foxtail millet	GS 2164	2.21	Crude Fiber	India	Brunda et al. 2017	genotype	Accession/ genotype
Fibre	Foxtail millet	DHF 28	2.2	Crude Fiber	India	Brunda et al. 2017	genotype	Accession/ genotype
Fibre	Foxtail millet	GS 2099	2.19	Crude Fiber	India	Brunda et al. 2017	genotype	Accession/ genotype
Fibre	Foxtail millet	DHF 25	2.19	Crude Fiber	India	Brunda et al. 2017	genotype	Accession/ genotype
Fibre	Foxtail millet	DHF 30	2.18	Crude Fiber	India	Brunda et al. 2017	genotype	Accession/ genotype
Fibre	Foxtail millet	DHF 13	1.96	Crude Fiber	India	Brunda et al. 2017	genotype	Accession/ genotype
Fibre	Foxtail millet	DHF 5	2.14	Crude Fiber	India	Brunda et al. 2017	genotype	Accession/ genotype
Fibre	Foxtail millet	DHF 18	2.03	Crude Fiber	India	Brunda et al. 2017	genotype	Accession/ genotype
Fibre	Foxtail millet	DHF4	2.15	Crude Fiber	India	Brunda et al. 2017	genotype	Accession/ genotype
Fibre	Foxtail millet	DHF 20	2.01	Crude Fiber	India	Brunda et al. 2017	genotype	Accession/ genotype
Fibre	Foxtail millet	DHF 19	2.02	Crude Fiber	India	Brunda et al. 2017	genotype	Accession/ genotype
Fibre	Foxtail millet	DHF 16	2.18	Crude Fiber	India	Brunda et al. 2017	genotype	Accession/ genotype
Fibre	Foxtail millet	RFM-10	2.06	Crude Fiber	India	Kamatar et al. 2015	genotype	Accession/ genotype	44germplasm, 31 lines
Fibre	Foxtail millet	H-1	1.96	Crude Fiber	India	Kamatar et al. 2015	genotype	Accession/ genotype	44germplasm, 31 lines
Fibre	Foxtail millet	H-2	2	Crude Fiber	India	Kamatar et al. 2015	genotype	Accession/ genotype	44germplasm, 31 lines
Fibre	Foxtail millet	CO-4	2.04	Crude Fiber	India	Kamatar et al. 2015	genotype	Accession/ genotype	44germplasm, 31 lines
Fibre	Foxtail millet	K-2	1.34	Crude Fiber	India	Kamatar et al. 2015	genotype	Accession/ genotype	44germplasm, 31 lines
Fibre	Foxtail millet	Krishnadevaraya	1.91	Crude Fiber	India	Kamatar et al. 2015	genotype	Accession/ genotype	44germplasm, 31 lines
Fibre	Foxtail millet	Narasimharaya	2.11	Crude Fiber	India	Kamatar et al. 2015	genotype	Accession/ genotype	44germplasm, 31 lines
Fibre	Foxtail millet	Chithra	2.06	Crude Fiber	India	Kamatar et al. 2015	genotype	Accession/ genotype	44germplasm, 31 lines
Fibre	Foxtail millet	Arjuna	1.91	Crude Fiber	India	Kamatar et al. 2015	genotype	Accession/ genotype	44germplasm, 31 lines
Fibre	Foxtail millet	Srilakshmi	1.92	Crude Fiber	India	Kamatar et al. 2015	genotype	Accession/ genotype	44germplasm, 31 lines
Fibre	Foxtail millet	K-222-1	2.08	Crude Fiber	India	Kamatar et al. 2015	genotype	Accession/ genotype	44germplasm, 31 lines
Fibre	Foxtail millet	Sia -3085	1.94	Crude Fiber	India	Kamatar et al. 2015	genotype	Accession/ genotype	44germplasm, 31 lines
Fibre	Foxtail millet	Meera	2.06	Crude Fiber	India	Kamatar et al. 2015	genotype	Accession/ genotype	44germplasm, 31 lines
Fibre	Foxtail millet	Pratapkagni	2.06	Crude Fiber	India	Kamatar et al. 2015	genotype	Accession/ genotype	44germplasm, 31 lines
Fibre	Foxtail millet	Ise 375	2.08	Crude Fiber	India	Kamatar et al. 2015	genotype	Accession/ genotype	44germplasm, 31 lines
Fibre	Foxtail millet	Ise 1312	2.07	Crude Fiber	India	Kamatar et al. 2015	genotype	Accession/ genotype	44germplasm, 31 lines
Fibre	Foxtail millet	Ise 1468	2.1	Crude Fiber	India	Kamatar et al. 2015	genotype	Accession/ genotype	44germplasm, 31 lines
Fibre	Foxtail millet	Ise 1685	2.16	Crude Fiber	India	Kamatar et al. 2015	genotype	Accession/ genotype	44germplasm, 31 lines
Fibre	Foxtail millet	Ise 900	1.89	Crude Fiber	India	Kamatar et al. 2015	genotype	Accession/ genotype	44germplasm, 31 lines
Fibre	Foxtail millet	Ise 140	2.17	Crude Fiber	India	Kamatar et al. 2015	genotype	Accession/ genotype	44germplasm, 31 lines
Fibre	Foxtail millet	Ise 758	2.04	Crude Fiber	India	Kamatar et al. 2015	genotype	Accession/ genotype	44germplasm, 31 lines
Fibre	Foxtail millet	Ise 1647	2	Crude Fiber	India	Kamatar et al. 2015	genotype	Accession/ genotype	44germplasm, 31 lines
Fibre	Foxtail millet	Ise 931	2.06	Crude Fiber	India	Kamatar et al. 2015	genotype	Accession/ genotype	44germplasm, 31 lines
Fibre	Foxtail millet	GS 2164	2.21	Crude Fiber	India	Kamatar et al. 2015	genotype	Accession/ genotype	44germplasm, 31 lines
Fibre	Foxtail millet	GS 2040	2.17	Crude Fiber	India	Kamatar et al. 2015	genotype	Accession/ genotype	44germplasm, 31 lines
Fibre	Foxtail millet	GS 515	2.06	Crude Fiber	India	Kamatar et al. 2015	genotype	Accession/ genotype	44germplasm, 31 lines
Fibre	Foxtail millet	GS 949	2.07	Crude Fiber	India	Kamatar et al. 2015	genotype	Accession/ genotype	44germplasm, 31 lines
Fibre	Foxtail millet	GS 592	2.11	Crude Fiber	India	Kamatar et al. 2015	genotype	Accession/ genotype	44germplasm, 31 lines
Fibre	Foxtail millet	GS 511	2.14	Crude Fiber	India	Kamatar et al. 2015	genotype	Accession/ genotype	44germplasm, 31 lines
Fibre	Foxtail millet	GS 90	2.05	Crude Fiber	India	Kamatar et al. 2015	genotype	Accession/ genotype	44germplasm, 31 lines
Fibre	Foxtail millet	GS 121	1.98	Crude Fiber	India	Kamatar et al. 2015	genotype	Accession/ genotype	44germplasm, 31 lines
Fibre	Foxtail millet	GS 271	2.01	Crude Fiber	India	Kamatar et al. 2015	genotype	Accession/ genotype	44germplasm, 31 lines
Fibre	Foxtail millet	GS 740	1.92	Crude Fiber	India	Kamatar et al. 2015	genotype	Accession/ genotype	44germplasm, 31 lines
Fibre	Foxtail millet	GS 1000	2.11	Crude Fiber	India	Kamatar et al. 2015	genotype	Accession/ genotype	44germplasm, 31 lines
Fibre	Foxtail millet	GS 1483	2.03	Crude Fiber	India	Kamatar et al. 2015	genotype	Accession/ genotype	44germplasm, 31 lines
Fibre	Foxtail millet	GS 1560	1.98	Crude Fiber	India	Kamatar et al. 2015	genotype	Accession/ genotype	44germplasm, 31 lines
Fibre	Foxtail millet	GS 2099	2.19	Crude Fiber	India	Kamatar et al. 2015	genotype	Accession/ genotype	44germplasm, 31 lines
Fibre	Foxtail millet	GS 2105	2.05	Crude Fiber	India	Kamatar et al. 2015	genotype	Accession/ genotype	44germplasm, 31 lines
Fibre	Foxtail millet	GS 2109	2.28	Crude Fiber	India	Kamatar et al. 2015	genotype	Accession/ genotype	44germplasm, 31 lines
Fibre	Foxtail millet	GS 2126	2.07	Crude Fiber	India	Kamatar et al. 2015	genotype	Accession/ genotype	44germplasm, 31 lines
Fibre	Foxtail millet	GS 2159	2.12	Crude Fiber	India	Kamatar et al. 2015	genotype	Accession/ genotype	44germplasm, 31 lines
Fibre	Foxtail millet	GS 2192	2.18	Crude Fiber	India	Kamatar et al. 2015	genotype	Accession/ genotype	44germplasm, 31 lines
Fibre	Foxtail millet	GS 2197	2.05	Crude Fiber	India	Kamatar et al. 2015	genotype	Accession/ genotype	44germplasm, 31 lines
Fibre	Foxtail millet	GS 2215	2.03	Crude Fiber	India	Kamatar et al. 2015	genotype	Accession/ genotype	44germplasm, 31 lines
Fibre	Foxtail millet	DHF 21	2.06	Crude Fiber	India	Kamatar et al. 2015	genotype	Accession/ genotype	44germplasm, 31 lines
Fibre	Foxtail millet	DHF 22	2.15	Crude Fiber	India	Kamatar et al. 2015	genotype	Accession/ genotype	44germplasm, 31 lines
Fibre	Foxtail millet	DHF 23	2.07	Crude Fiber	India	Kamatar et al. 2015	genotype	Accession/ genotype	44germplasm, 31 lines
Fibre	Foxtail millet	DHF 24	2.17	Crude Fiber	India	Kamatar et al. 2015	genotype	Accession/ genotype	44germplasm, 31 lines
Fibre	Foxtail millet	DHF 25	2.19	Crude Fiber	India	Kamatar et al. 2015	genotype	Accession/ genotype	44germplasm, 31 lines
Fibre	Foxtail millet	DHF 26	2.08	Crude Fiber	India	Kamatar et al. 2015	genotype	Accession/ genotype	44germplasm, 31 lines
Fibre	Foxtail millet	DHF 27	2.31	Crude Fiber	India	Kamatar et al. 2015	genotype	Accession/ genotype	44germplasm, 31 lines
Fibre	Foxtail millet	DHF 28	2.2	Crude Fiber	India	Kamatar et al. 2015	genotype	Accession/ genotype	44germplasm, 31 lines
Fibre	Foxtail millet	DHF 29	2.23	Crude Fiber	India	Kamatar et al. 2015	genotype	Accession/ genotype	44germplasm, 31 lines
Fibre	Foxtail millet	DHF-30	2.18	Crude Fiber	India	Kamatar et al. 2015	genotype	Accession/ genotype	44germplasm, 31 lines
Fibre	Foxtail millet	ST-13	2.1	Crude Fiber	India	Kamatar et al. 2015	genotype	Accession/ genotype	44germplasm, 31 lines
Fibre	Foxtail millet	DHF 1	2.23	Crude Fiber	India	Kamatar et al. 2015	genotype	Accession/ genotype	44germplasm, 31 lines
Fibre	Foxtail millet	DHF 2	2.24	Crude Fiber	India	Kamatar et al. 2015	genotype	Accession/ genotype	44germplasm, 31 lines
Fibre	Foxtail millet	DHF 3	2.06	Crude Fiber	India	Kamatar et al. 2015	genotype	Accession/ genotype	44germplasm, 31 lines
Fibre	Foxtail millet	DHF 4	2.15	Crude Fiber	India	Kamatar et al. 2015	genotype	Accession/ genotype	44germplasm, 31 lines
Fibre	Foxtail millet	DHF 5	2.14	Crude Fiber	India	Kamatar et al. 2015	genotype	Accession/ genotype	44germplasm, 31 lines
Fibre	Foxtail millet	DHF 6	2.02	Crude Fiber	India	Kamatar et al. 2015	genotype	Accession/ genotype	44germplasm, 31 lines
Fibre	Foxtail millet	DHF 7	2.13	Crude Fiber	India	Kamatar et al. 2015	genotype	Accession/ genotype	44germplasm, 31 lines
Fibre	Foxtail millet	DHF 8	2.11	Crude Fiber	India	Kamatar et al. 2015	genotype	Accession/ genotype	44germplasm, 31 lines
Fibre	Foxtail millet	DHF 9	2.07	Crude Fiber	India	Kamatar et al. 2015	genotype	Accession/ genotype	44germplasm, 31 lines
Fibre	Foxtail millet	DHF 10	1.95	Crude Fiber	India	Kamatar et al. 2015	genotype	Accession/ genotype	44germplasm, 31 lines
Fibre	Foxtail millet	DHF 11	2.16	Crude Fiber	India	Kamatar et al. 2015	genotype	Accession/ genotype	44germplasm, 31 lines
Fibre	Foxtail millet	DHF 12	1.94	Crude Fiber	India	Kamatar et al. 2015	genotype	Accession/ genotype	44germplasm, 31 lines
Fibre	Foxtail millet	DHF 13	1.96	Crude Fiber	India	Kamatar et al. 2015	genotype	Accession/ genotype	44germplasm, 31 lines
Fibre	Foxtail millet	DHF 14	2.13	Crude Fiber	India	Kamatar et al. 2015	genotype	Accession/ genotype	44germplasm, 31 lines
Fibre	Foxtail millet	DHF 15	1.99	Crude Fiber	India	Kamatar et al. 2015	genotype	Accession/ genotype	44germplasm, 31 lines
Fibre	Foxtail millet	DHF 16	2.18	Crude Fiber	India	Kamatar et al. 2015	genotype	Accession/ genotype	44germplasm, 31 lines
Fibre	Foxtail millet	DHF 17	2.11	Crude Fiber	India	Kamatar et al. 2015	genotype	Accession/ genotype	44germplasm, 31 lines
Fibre	Foxtail millet	DHF 18	2.03	Crude Fiber	India	Kamatar et al. 2015	genotype	Accession/ genotype	44germplasm, 31 lines
Fibre	Foxtail millet	DHF 19	2.02	Crude Fiber	India	Kamatar et al. 2015	genotype	Accession/ genotype	44germplasm, 31 lines
Fibre	Foxtail millet	DHF 20	2.01	Crude Fiber	India	Kamatar et al. 2015	genotype	Accession/ genotype	44germplasm, 31 lines
Fibre	Foxtail millet	Hmt-100-1	1.95	Crude Fiber	India	Kamatar et al. 2015	genotype	Accession/ genotype	44germplasm, 31 lines
Fibre	Foxtail millet	PS-4	1.97	Crude Fiber	India	Kamatar et al. 2015	genotype	Accession/ genotype	44germplasm, 31 lines
Fibre	Foxtail millet	Sia-326	2.04	Crude Fiber	India	Kamatar et al. 2015	genotype	Accession/ genotype	44germplasm, 31 lines
Fibre	Foxtail millet	PALL	1.52	Crude Fiber	Srilanka	Kumari et al. 2016	variety	variety
Fibre	Foxtail millet	HAML	2.35	Crude Fiber	Srilanka	Kumari et al. 2016	variety	variety
Fibre	Foxtail millet	MOL	1.77	Crude Fiber	Srilanka	Kumari et al. 2016	variety	variety
Fibre	Foxtail millet	JAFL	2.38	Crude Fiber	Srilanka	Kumari et al. 2016	variety	variety
Fibre	Job's tears	Ngum	3.8	Crude Fiber	India	Luithui and Meera 2018	variety	variety
Fibre	Pearl millet	ICMS-7703	17	Crude Fiber	India	Singh et al. 1987	variety	variety	normal protein content
Fibre	Pearl millet	WC-C75	17.6	Crude Fiber	India	Singh et al. 1987	synthetic variety	variety	normal protein content
Fibre	Pearl millet	B-816	18.2	Crude Fiber	India	Singh et al. 1987	inbred line	Accession/ genotype	high protein content
Fibre	Pearl millet	WC-190	19.6	Crude Fiber	India	Singh et al. 1987	inbred line	Accession/ genotype	high protein content
Fibre	Pearl millet	700112	18.9	Crude Fiber	India	Singh et al. 1987	inbred line	Accession/ genotype	high protein content
Fibre	Pearl millet	ikmv 8201	9.5	Total Dietary Fiber	West Africa, FCT	Stadlmayr et al., 2012	variety	variety
Fibre	Pearl millet	ikmp 1	8.1	Total Dietary Fiber	West Africa, FCT	Stadlmayr et al., 2012	variety	variety
Fibre	Pearl millet	ikmp 2	9.1	Total Dietary Fiber	West Africa, FCT	Stadlmayr et al., 2012	variety	variety
Fibre	Pearl millet	ikmp 3	11.3	Total Dietary Fiber	West Africa, FCT	Stadlmayr et al., 2012	variety	variety
Fibre	Pearl millet	ikmp 4	9.7	Total Dietary Fiber	West Africa, FCT	Stadlmayr et al., 2012	variety	variety
Fibre	Pearl millet	ikmp 5	12.4	Total Dietary Fiber	West Africa, FCT	Stadlmayr et al., 2012	variety	variety
Fibre	Pearl millet	ikmp 6	8.4	Total Dietary Fiber	West Africa, FCT	Stadlmayr et al., 2012	variety	variety
Fibre	Pearl millet	ikmp 7	9.2	Total Dietary Fiber	West Africa, FCT	Stadlmayr et al., 2012	variety	variety
Fibre	Pearl millet	ikmp 8	8.8	Total Dietary Fiber	West Africa, FCT	Stadlmayr et al., 2012	variety	variety
Fibre	Pearl millet	ikmp 9	10.1	Total Dietary Fiber	West Africa, FCT	Stadlmayr et al., 2012	variety	variety
Fibre	Pearl millet	ikmp 10	9.6	Total Dietary Fiber	West Africa, FCT	Stadlmayr et al., 2012	variety	variety
Fibre	Pearl millet	ikmp 11	10.1	Total Dietary Fiber	West Africa, FCT	Stadlmayr et al., 2012	variety	variety
Fibre	Pearl millet	ikmp 12	9.6	Total Dietary Fiber	West Africa, FCT	Stadlmayr et al., 2012	variety	variety
Fibre	Pearl millet	ikmp 13	9.1	Total Dietary Fiber	West Africa, FCT	Stadlmayr et al., 2012	variety	variety
Fibre	Pearl millet	Shanti	2.28	Crude Fiber	India	Kulthe et al. 2016	cultivar/ variety	variety
Fibre	Pearl millet	Pioneer 86M64	2.07	Crude Fiber	India	Kulthe et al. 2016	cultivar/ variety	variety
Fibre	Pearl millet	ICMV221	11.24	Total Dietary Fiber	India	Krishnan et al. 2017	cultivar/ variety	variety
Fibre	Pearl millet	ICMV221J	12.09	Total Dietary Fiber	India	Krishnan et al. 2017	cultivar/ variety	variety
Fibre	Pearl millet	ICTP8203	11.41	Total Dietary Fiber	India	Krishnan et al. 2017	cultivar/ variety	variety
Fibre	Pearl millet	ICTP8203J	13.23	Total Dietary Fiber	India	Krishnan et al. 2017	cultivar/ variety	variety
Fibre	Pearl millet	JBV2	12.6	Total Dietary Fiber	India	Krishnan et al. 2017	cultivar/ variety	variety
Fibre	Pearl millet	Mysore local	10.91	Total Dietary Fiber	India	Krishnan et al. 2017	cultivar/ variety	variety
Fibre	Pearl millet	Anantapur local	10.61	Total Dietary Fiber	India	Krishnan et al. 2017	cultivar/ variety	variety
Fibre	Pearl millet	GHB558	10.96	Total Dietary Fiber	India	Krishnan et al. 2017	cultivar/ variety	variety
Fibre	Pearl millet	GHB744	12.63	Total Dietary Fiber	India	Krishnan et al. 2017	cultivar/ variety	variety
Fibre	Pearl millet	RHB173	12.1	Total Dietary Fiber	India	Krishnan et al. 2017	cultivar/ variety	variety
Fibre	Pearl millet	HHB67 improved	13.08	Total Dietary Fiber	India	Krishnan et al. 2017	cultivar/ variety	variety
Fibre	Pearl millet	HHB223	11.86	Total Dietary Fiber	India	Krishnan et al. 2017	cultivar/ variety	variety
Fibre	Pearl millet	HHB226	14.26	Total Dietary Fiber	India	Krishnan et al. 2017	cultivar/ variety	variety
Fibre	Pearl millet	Ka	4.47	Crude Fiber	Namibia	F.N Shindume et al. 2019	genotype/ line	Accession/ genotype
Fibre	Pearl millet	L5AP18	4.2	Crude Fiber	Namibia	F.N Shindume et al. 2019	genotype/ line	Accession/ genotype
Fibre	Pearl millet	L7AP1A	4.7	Crude Fiber	Namibia	F.N Shindume et al. 2019	genotype/ line	Accession/ genotype
Fibre	Pearl millet	R6P1-1	3.83	Crude Fiber	Namibia	F.N Shindume et al. 2019	genotype/ line	Accession/ genotype
Fibre	Pearl millet	RP95	2.51	Crude Fiber	Namibia	F.N Shindume et al. 2019	genotype/ line	Accession/ genotype
Fibre	Pearl millet	L8P5Rep2	4.21	Crude Fiber	Namibia	F.N Shindume et al. 2019	genotype/ line	Accession/ genotype
Fibre	Pearl millet	L8P5Rep1	3.29	Crude Fiber	Namibia	F.N Shindume et al. 2019	genotype/ line	Accession/ genotype
Fibre	Pearl millet	Oka2	4.25	Crude Fiber	Namibia	F.N Shindume et al. 2019	genotype/ line	Accession/ genotype
Fibre	Pearl millet	L3P5	4.43	Crude Fiber	Namibia	F.N Shindume et al. 2019	genotype/ line	Accession/ genotype
Fibre	Pearl millet	L4P1	3.77	Crude Fiber	Namibia	F.N Shindume et al. 2019	genotype/ line	Accession/ genotype
Fibre	Pearl millet	L8P12	4.21	Crude Fiber	Namibia	F.N Shindume et al. 2019	genotype/ line	Accession/ genotype
Fibre	Pearl millet	L10P18	3.63	Crude Fiber	Namibia	F.N Shindume et al. 2019	genotype/ line	Accession/ genotype
Fibre	Pearl millet	L5P11Rep2	3.65	Crude Fiber	Namibia	F.N Shindume et al. 2019	genotype/ line	Accession/ genotype
Fibre	Pearl millet	L10P13Rep1	2.97	Crude Fiber	Namibia	F.N Shindume et al. 2019	genotype/ line	Accession/ genotype
Fibre	Pearl millet	Dembi Millet	13.32	Crude Fiber	Sudan	Elsadig et al. 2016	genotype	Accession/ genotype
Fibre	Pearl millet	Sudan II	15.37	Crude Fiber	Sudan	Elsadig et al. 2016	genotype	Accession/ genotype
Fibre	Pearl millet	Ugandi	12.93	Crude Fiber	Sudan	Elsadig et al. 2016	genotype	Accession/ genotype
Fibre	Pearl millet	Dembi Kabkabia	9.76	Crude Fiber	Sudan	Elsadig et al. 2016	genotype	Accession/ genotype
Fibre	Pearl millet	Dembi Shangal Toby	10.63	Crude Fiber	Sudan	Elsadig et al. 2016	genotype	Accession/ genotype
Fibre	Pearl millet	HSD10331	11.82	Crude Fiber	Sudan	Elsadig et al. 2016	genotype	Accession/ genotype
Fibre	Pearl millet	HSD10392	10.52	Crude Fiber	Sudan	Elsadig et al. 2016	genotype	Accession/ genotype
Fibre	Pearl millet	HSD10362	10.01	Crude Fiber	Sudan	Elsadig et al. 2016	genotype	Accession/ genotype
Fibre	Pearl millet	SADC (Long)	10.54	Crude Fiber	Sudan	Elsadig et al. 2016	genotype	Accession/ genotype
Fibre	Pearl millet	Dembi Sea	10.51	Crude Fiber	Sudan	Elsadig et al. 2016	genotype	Accession/ genotype
Fibre	Pearl millet	SADC (Togo)	12.23	Crude Fiber	Sudan	Elsadig et al. 2016	genotype	Accession/ genotype
Fibre	Pearl millet	HSD10313	10.66	Crude Fiber	Sudan	Elsadig et al. 2016	genotype	Accession/ genotype
Fibre	Pearl millet	HSD7131	10.52	Crude Fiber	Sudan	Elsadig et al. 2016	genotype	Accession/ genotype
Fibre	Pearl millet	HSD10318	12.3	Crude Fiber	Sudan	Elsadig et al. 2016	genotype	Accession/ genotype
Fibre	Pearl millet	HSD7133	11.81	Crude Fiber	Sudan	Elsadig et al. 2016	genotype	Accession/ genotype
Fibre	Pearl millet	HSD10292	10.3	Crude Fiber	Sudan	Elsadig et al. 2016	genotype	Accession/ genotype
Fibre	Pearl millet	HSD55555	10.1	Crude Fiber	Sudan	Elsadig et al. 2016	genotype	Accession/ genotype
Fibre	Pearl millet	HSD10293	11.32	Crude Fiber	Sudan	Elsadig et al. 2016	genotype	Accession/ genotype
Fibre	Pearl millet	HSD7132	11.35	Crude Fiber	Sudan	Elsadig et al. 2016	genotype	Accession/ genotype
Fibre	Pearl millet	HSD7135	10.51	Crude Fiber	Sudan	Elsadig et al. 2016	genotype	Accession/ genotype
Fibre	Pearl millet	HSD10303	10.87	Crude Fiber	Sudan	Elsadig et al. 2016	genotype	Accession/ genotype
Fibre	Pearl millet	HSD10319	11.97	Crude Fiber	Sudan	Elsadig et al. 2016	genotype	Accession/ genotype
Fibre	Pearl millet	HSD7134	11.97	Crude Fiber	Sudan	Elsadig et al. 2016	genotype	Accession/ genotype
Fibre	Pearl millet	HSD10376	11.51	Crude Fiber	Sudan	Elsadig et al. 2016	genotype	Accession/ genotype
Fibre	Pearl millet	HSD10294	9.63	Crude Fiber	Sudan	Elsadig et al. 2016	genotype	Accession/ genotype
Fibre	Pearl millet	HSD10309	11.14	Crude Fiber	Sudan	Elsadig et al. 2016	genotype	Accession/ genotype
Fibre	Pearl millet	HSD10291	11.01	Crude Fiber	Sudan	Elsadig et al. 2016	genotype	Accession/ genotype
Fibre	Pearl millet	HSD10354	10.99	Crude Fiber	Sudan	Elsadig et al. 2016	genotype	Accession/ genotype
Fibre	Pearl millet	MCNELC	13.24	Crude Fiber	Sudan	Elsadig et al. 2016	genotype	Accession/ genotype
Fibre	Pearl millet	Ashana	11.72	Crude Fiber	Sudan	Elsadig et al. 2016	genotype	Accession/ genotype
Fibre	Proso millet	ANUL	2.35	Crude Fiber	Srilanka	Kumari et al. 2016	variety	variety
Fibre	Proso millet	HAML	2.3	Crude Fiber	Srilanka	Kumari et al. 2016	variety	variety
Fibre	Sorghum	RPASV-3	3.61	Crude Fiber	India	Chavan et al. 2015	variety	variety
Fibre	Sorghum	Pandhari chikni	3.15	Crude Fiber	India	Chavan et al. 2015	variety	variety
Fibre	Sorghum	Dadar local	3.33	Crude Fiber	India	Chavan et al. 2015	variety	variety
Fibre	Sorghum	M-35-1	3.17	Crude Fiber	India	Chavan et al. 2015	variety	variety
Fibre	Sorghum	Phule Revati	3.36	Crude Fiber	India	Chavan et al. 2015	variety	variety
Fibre	Sorghum	RPASV-3	3.61	Crude Fiber	India	Chavan et al. 2015	variety	variety
Fibre	Sorghum	Pandhari chikni	3.15	Crude Fiber	India	Chavan et al. 2015	variety	variety
Fibre	Sorghum	Dadar local	3.33	Crude Fiber	India	Chavan et al. 2015	variety	variety
Fibre	Sorghum	M-35-1	3.17	Crude Fiber	India	Chavan et al. 2015	variety	variety
Fibre	Sorghum	Phule Revati	3.36	Crude Fiber	India	Chavan et al. 2015	variety	variety
Fibre	Sorghum	Hamra	2.26	Crude Fiber	Saudi Arabia	Mustafa et al. 2003	variety	variety
[truncated: 323 more rows]

## Sheet: Minerals_Table 4
Nutrient	Type of millet	Variety	Quantity (mg/100g	Country	Author	Remarks	Remarks
Iron	Barnyard millet	IT153591	5.25	Korea	Kim et al. 2011	variety	variety
Iron	Barnyard millet	IT153599	2.28	Korea	Kim et al. 2011	variety	variety
Iron	Barnyard millet	IT153600	4.61	Korea	Kim et al. 2011	variety	variety
Iron	Barnyard millet	IT153604	12.86	Korea	Kim et al. 2011	variety	variety
Iron	Barnyard millet	IT153607	6.92	Korea	Kim et al. 2011	variety	variety
Iron	Barnyard millet	IT170609	7.32	Korea	Kim et al. 2011	variety	variety
Iron	Barnyard millet	IT170610	8.89	Korea	Kim et al. 2011	variety	variety
Iron	Barnyard millet	IT186707	5.44	Korea	Kim et al. 2011	variety	variety
Iron	Barnyard millet	K141285	5.64	Korea	Kim et al. 2011	variety	variety
Iron	Barnyard millet	K141286	2.85	Korea	Kim et al. 2011	variety	variety
Iron	Barnyard millet	K141287	6.06	Korea	Kim et al. 2011	variety	variety
Iron	Barnyard millet	K141288	5.32	Korea	Kim et al. 2011	variety	variety
Iron	Barnyard millet	K141289	5.66	Korea	Kim et al. 2011	variety	variety
Iron	Barnyard millet	VL21	19.53	India	Panwar et al. 2016	variety	variety
Iron	Barnyard millet	VL29	22.98	India	Panwar et al. 2016	variety	variety
Iron	Barnyard millet	VL 172	19.27	India	Panwar et al. 2016	variety	variety
Iron	Barnyard millet	VL207	20.25	India	Panwar et al. 2016	variety	variety
Iron	Barnyard millet	PRJ1	19.93	India	Panwar et al. 2016	variety	variety
Iron	Brown top millet	IC 606693	6.25	India	Niharika et al 2020	genotype	genotype/accession
Iron	Brown top millet	IC 613546	6.81	India	Niharika et al 2021	genotype	genotype/accession
Iron	Brown top millet	IC 613547	3.7	India	Niharika et al 2022	genotype	genotype/accession
Iron	Brown top millet	IC 613548	4.88	India	Niharika et al 2023	genotype	genotype/accession
Iron	Brown top millet	IC 613549	10.23	India	Niharika et al 2024	genotype	genotype/accession
Iron	Brown top millet	IC 613550	6.05	India	Niharika et al 2025	genotype	genotype/accession
Iron	Brown top millet	IC 613551	7.34	India	Niharika et al 2026	genotype	genotype/accession
Iron	Brown top millet	IC 613552	13.27	India	Niharika et al 2027	genotype	genotype/accession
Iron	Brown top millet	IC 613553	12.77	India	Niharika et al 2028	genotype	genotype/accession
Iron	Brown top millet	IC 613554	5.05	India	Niharika et al 2029	genotype	genotype/accession
Iron	Brown top millet	IC 613555	8.95	India	Niharika et al 2030	genotype	genotype/accession
Iron	Brown top millet	IC 613556	3.75	India	Niharika et al 2031	genotype	genotype/accession
Iron	Brown top millet	IC 613557	10.98	India	Niharika et al 2032	genotype	genotype/accession
Iron	Brown top millet	IC 613558	10.6	India	Niharika et al 2033	genotype	genotype/accession
Iron	Brown top millet	IC 613559	11.2	India	Niharika et al 2034	genotype	genotype/accession
Iron	Brown top millet	IC 613560	5.1	India	Niharika et al 2035	genotype	genotype/accession
Iron	Brown top millet	IC 613561	12.59	India	Niharika et al 2036	genotype	genotype/accession
Iron	Brown top millet	IC 613562	6.55	India	Niharika et al 2037	genotype	genotype/accession
Iron	Brown top millet	IC 617952	13.01	India	Niharika et al 2038	genotype	genotype/accession
Iron	Brown top millet	IC 617953	9.29	India	Niharika et al 2039	genotype	genotype/accession
Iron	Brown top millet	IC 617954	12.28	India	Niharika et al 2040	genotype	genotype/accession
Iron	Brown top millet	IC 617955	6.44	India	Niharika et al 2041	genotype	genotype/accession
Iron	Brown top millet	IC 617956	7.59	India	Niharika et al 2042	genotype	genotype/accession
Iron	Brown top millet	IC 617957	15.32	India	Niharika et al 2043	genotype	genotype/accession
Iron	Brown top millet	IC 617958	3.91	India	Niharika et al 2044	genotype	genotype/accession
Iron	Brown top millet	IC 617959	10.12	India	Niharika et al 2045	genotype	genotype/accession
Iron	Brown top millet	IC 617960	12.03	India	Niharika et al 2046	genotype	genotype/accession
Iron	Brown top millet	IC 617961	10.12	India	Niharika et al 2047	genotype	genotype/accession
Iron	Brown top millet	IC 617962	7.28	India	Niharika et al 2048	genotype	genotype/accession
Iron	Brown top millet	28 bijapur collection	12.28	India	Niharika et al 2049	genotype	genotype/accession
Iron	Finger millet	IE 4708	6.52	Burundi	Upadhyaya et al. 2011a	Accession	Accession/ genotype
Iron	Finger millet	IE 2921	5.9	Malawi	Upadhyaya et al. 2011a	Accession	Accession/ genotype
Iron	Finger millet	IE 4709	4.85	Burundi	Upadhyaya et al. 2011a	Accession	Accession/ genotype
Iron	Finger millet	IE 588	4.59	India	Upadhyaya et al. 2011a	Accession	Accession/ genotype
Iron	Finger millet	IE 5736	4.55	Nepal	Upadhyaya et al. 2011a	Accession	Accession/ genotype
Iron	Finger millet	IE 4476	4.49	Zimbabwe	Upadhyaya et al. 2011a	Accession	Accession/ genotype
Iron	Finger millet	IE 942	4.06	India	Upadhyaya et al. 2011a	Accession	Accession/ genotype
Iron	Finger millet	IE 4734	3.96	India	Upadhyaya et al. 2011a	Accession	Accession/ genotype
Iron	Finger millet	IE 5794	3.91	Nepal	Upadhyaya et al. 2011a	Accession	Accession/ genotype
Iron	Finger millet	IE 4107	3.9	Uganda	Upadhyaya et al. 2011a	Accession	Accession/ genotype
Iron	Finger millet	IE 7338	3.89	Kenya	Upadhyaya et al. 2011a	Accession	Accession/ genotype
Iron	Finger millet	IE 2093	3.81	India	Upadhyaya et al. 2011a	Accession	Accession/ genotype
Iron	Finger millet	IE 5870	3.8	Nepal	Upadhyaya et al. 2011a	Accession	Accession/ genotype
Iron	Finger millet	IE 4443	3.79	Cameroon	Upadhyaya et al. 2011a	Accession	Accession/ genotype
Iron	Finger millet	IE 817	3.76	India	Upadhyaya et al. 2011a	Accession	Accession/ genotype
Iron	Finger millet	IE 2043 (PR 202)	2.65	India	Upadhyaya et al. 2011a	Accession	Accession/ genotype
Iron	Finger millet	IE 3618 (RAU 8)	3.14	India	Upadhyaya et al. 2011a	Accession	Accession/ genotype
Iron	Finger millet	IE 4673 (VL 149)	3.59	India	Upadhyaya et al. 2011a	Accession	Accession/ genotype
Iron	Finger millet	VR 708	3.01	India	Upadhyaya et al. 2011a	Accession	Accession/ genotype
Iron	Finger millet	Ateso	12	Machakos	Shibairo et al 2014	genotype	Accession/ genotype
Iron	Finger millet	Gulu-E	3.3	Machakos	Shibairo et al 2014	genotype	Accession/ genotype
Iron	Finger millet	FMV-1	4	Machakos	Shibairo et al 2014	genotype	Accession/ genotype
Iron	Finger millet	KNE-479	13.7	Machakos	Shibairo et al 2014	genotype	Accession/ genotype
Iron	Finger millet	KNE-1034	14.7	Machakos	Shibairo et al 2014	genotype	Accession/ genotype
Iron	Finger millet	Nyaikuro	11	Machakos	Shibairo et al 2014	genotype	Accession/ genotype
Iron	Finger millet	GBK043052	4.88	Kenya	Otieno et al. 2021	variety	variety
Iron	Finger millet	GBK043180	8.08	Kenya	Otieno et al. 2021	variety	variety
Iron	Finger millet	GBK043275	6.18	Kenya	Otieno et al. 2021	variety	variety
Iron	Finger millet	GBK51717	7.73	Uganda	Otieno et al. 2021	variety	variety
Iron	Finger millet	GBK051721	6.17	Uganda	Otieno et al. 2021	variety	variety
Iron	Finger millet	GBK051718	7.5	Uganda	Otieno et al. 2021	variety	variety
Iron	Finger millet	GBK 051725	16.8	Uganda	Otieno et al. 2021	variety	variety
Iron	Finger millet	GBK51705	8.13	Uganda	Otieno et al. 2021	variety	variety
Iron	Finger millet	CHEPNYALTET	5.33	Kenya	Otieno et al. 2021	variety	variety
Iron	Finger millet	GBK057855	6.44	Uganda	Otieno et al. 2021	variety	variety
Iron	Finger millet	Sri Chaitanya	3.2	India	Udamala et al., 2020	line/ Genotype	Accession/ genotype
Iron	Finger millet	Bharathi	2.9	India	Udamala et al., 2020	line/ Genotype	Accession/ genotype
Iron	Finger millet	Champavathi	2.4	India	Udamala et al., 2020	line/ Genotype	Accession/ genotype
Iron	Finger millet	Vegavathi	4	India	Udamala et al., 2020	line/ Genotype	Accession/ genotype
Iron	Finger millet	VR 1101	2.2	India	Udamala et al., 2020	line/ Genotype	Accession/ genotype
Iron	Finger millet	VR 1110	2.2	India	Udamala et al., 2020	line/ Genotype	Accession/ genotype
Iron	Finger millet	VR 1151	2.6	India	Udamala et al., 2020	line/ Genotype	Accession/ genotype
Iron	Finger millet	VR 1131	4.2	India	Udamala et al., 2020	line/ Genotype	Accession/ genotype
Iron	Finger millet	VR 1125	3	India	Udamala et al., 2020	line/ Genotype	Accession/ genotype
Iron	Finger millet	VR 1112	2	India	Udamala et al., 2020	line/ Genotype	Accession/ genotype
Iron	Finger millet	VR 1117	4	India	Udamala et al., 2020	line/ Genotype	Accession/ genotype
Iron	Finger millet	VL 352	1.9	India	Udamala et al., 2020	line/ Genotype	Accession/ genotype
Iron	Finger millet	GPU 67	3.8	India	Udamala et al., 2020	line/ Genotype	Accession/ genotype
Iron	Finger millet	PR 202	2.2	India	Udamala et al., 2020	line/ Genotype	Accession/ genotype
Iron	Finger millet	Vakula	2.2	India	Udamala et al., 2020	line/ Genotype	Accession/ genotype
Iron	Finger millet	EG 4	3.2	India	Udamala et al., 2020	line/ Genotype	Accession/ genotype
Iron	Finger millet	EG 16	3.6	India	Udamala et al., 2020	line/ Genotype	Accession/ genotype
Iron	Finger millet	EG 17	3.3	India	Udamala et al., 2020	line/ Genotype	Accession/ genotype
Iron	Finger millet	EG 18	2.5	India	Udamala et al., 2020	line/ Genotype	Accession/ genotype
Iron	Finger millet	EG 21	2.7	India	Udamala et al., 2020	line/ Genotype	Accession/ genotype
Iron	Finger millet	EG 24	3.1	India	Udamala et al., 2020	line/ Genotype	Accession/ genotype
Iron	Finger millet	EG 31	2.6	India	Udamala et al., 2020	line/ Genotype	Accession/ genotype
Iron	Finger millet	VR 1179	2.9	India	Udamala et al., 2020	line/ Genotype	Accession/ genotype
Iron	Finger millet	VR 1174	4.2	India	Udamala et al., 2020	line/ Genotype	Accession/ genotype
Iron	Finger millet	EG 48	2.1	India	Udamala et al., 2020	line/ Genotype	Accession/ genotype
Iron	Finger millet	VR 1171	3.2	India	Udamala et al., 2020	line/ Genotype	Accession/ genotype
Iron	Finger millet	VR1165	2.2	India	Udamala et al., 2020	line/ Genotype	Accession/ genotype
Iron	Finger millet	VR1163	2.6	India	Udamala et al., 2020	line/ Genotype	Accession/ genotype
Iron	Finger millet	GPU 45	4.1	India	Udamala et al., 2020	line/ Genotype	Accession/ genotype
Iron	Finger millet	VL 376	4	India	Udamala et al., 2020	line/ Genotype	Accession/ genotype
Iron	Finger millet	VL146	4.82	India	Panwar et al. 2016	variety	variety
Iron	Finger millet	VL149	4.08	India	Panwar et al. 2016	variety	variety
Iron	Finger millet	VL204	5.56	India	Panwar et al. 2016	variety	variety
Iron	Finger millet	VL315	5.3	India	Panwar et al. 2016	variety	variety
Iron	Finger millet	VL324	5.27	India	Panwar et al. 2016	variety	variety
Iron	Finger millet	GN 1	4.74	India	Nakarani et al. 2020	Genotype	Accession/ genotype
Iron	Finger millet	GN 2	4.02	India	Nakarani et al. 2020	Genotype	Accession/ genotype
Iron	Finger millet	GN 3	4.76	India	Nakarani et al. 2020	Genotype	Accession/ genotype
Iron	Finger millet	GN 4	4.47	India	Nakarani et al. 2020	Genotype	Accession/ genotype
Iron	Finger millet	GN 5	4.36	India	Nakarani et al. 2020	Genotype	Accession/ genotype
Iron	Finger millet	GNN 6	4.32	India	Nakarani et al. 2020	Genotype	Accession/ genotype
Iron	Finger millet	GNN 7	4.51	India	Nakarani et al. 2020	Genotype	Accession/ genotype
Iron	Finger millet	WN 585	4.62	India	Nakarani et al. 2020	Genotype	Accession/ genotype
Iron	Finger millet	WN 548	4.47	India	Nakarani et al. 2020	Genotype	Accession/ genotype
Iron	Finger millet	WN 550	4.34	India	Nakarani et al. 2020	Genotype	Accession/ genotype
Iron	Finger millet	GPU-28	8.8	India	Patil et al. 2019	Genotype	Accession/ genotype
Iron	Finger millet	GPU-48	8.1	India	Patil et al. 2019	Genotype	Accession/ genotype
Iron	Finger millet	GPU-67	6.3	India	Patil et al. 2019	Genotype	Accession/ genotype
Iron	Finger millet	VL-149	6.4	India	Patil et al. 2019	Genotype	Accession/ genotype
Iron	Finger millet	PR-202	7.9	India	Patil et al. 2019	Genotype	Accession/ genotype
Iron	Finger millet	RAU-8	8.1	India	Patil et al. 2019	Genotype	Accession/ genotype
Iron	Finger millet	VR-708	6.9	India	Patil et al. 2019	Genotype	Accession/ genotype
Iron	Finger millet	KOPN-235	8.7	India	Patil et al. 2019	Genotype	Accession/ genotype
Iron	Finger millet	KMR-204	6.5	India	Patil et al. 2019	Genotype	Accession/ genotype
Iron	Finger millet	L-5	5.7	India	Patil et al. 2019	Genotype	Accession/ genotype
Iron	Finger millet	MR-6	6.6	India	Patil et al. 2019	Genotype	Accession/ genotype
Iron	Finger millet	WN-259	5.9	India	Patil et al. 2019	Genotype	Accession/ genotype
Iron	Finger millet	GPU-45	6.7	India	Patil et al. 2019	Genotype	Accession/ genotype
Iron	Finger millet	GPU-66	6	India	Patil et al. 2019	Genotype	Accession/ genotype
Iron	Finger millet	TNAU 1022	5.8	India	Patil et al. 2019	Genotype	Accession/ genotype
Iron	Finger millet	DM 7	5	India	Patil et al. 2019	Genotype	Accession/ genotype
Iron	Finger millet	PPP 2885	5.9	India	Patil et al. 2019	Genotype	Accession/ genotype
Iron	Finger millet	OEB 530	4.9	India	Patil et al. 2019	Genotype	Accession/ genotype
Iron	Finger millet	GE-205	7.5	India	Patil et al. 2019	Genotype	Accession/ genotype
Iron	Finger millet	GE-406	5.2	India	Patil et al. 2019	Genotype	Accession/ genotype
Iron	Finger millet	PES-110	8.8	India	Patil et al. 2019	Genotype	Accession/ genotype
Iron	Finger millet	MR-1	5.3	India	Patil et al. 2019	Genotype	Accession/ genotype
Iron	Finger millet	GE-942	8.4	India	Patil et al. 2019	Genotype	Accession/ genotype
Iron	Finger millet	WWN-8	5.9	India	Patil et al. 2019	Genotype	Accession/ genotype
Iron	Finger millet	WWN-9	4.6	India	Patil et al. 2019	Genotype	Accession/ genotype
Iron	Finger millet	WWN-10	5.6	India	Patil et al. 2019	Genotype	Accession/ genotype
Iron	Finger millet	WWN-11	5.2	India	Patil et al. 2019	Genotype	Accession/ genotype
Iron	Finger millet	WWN-13	5.1	India	Patil et al. 2019	Genotype	Accession/ genotype
Iron	Finger millet	BR 6	5.5	India	Patil et al. 2019	Genotype	Accession/ genotype
Iron	Finger millet	GPU 80	4.9	India	Patil et al. 2019	Genotype	Accession/ genotype
Iron	Finger millet	GN-1	5.5	India	Patil et al. 2019	Genotype	Accession/ genotype
Iron	Finger millet	GN-2	6.6	India	Patil et al. 2019	Genotype	Accession/ genotype
Iron	Finger millet	GN-3	8.7	India	Patil et al. 2019	Genotype	Accession/ genotype
Iron	Finger millet	GN-4	5.8	India	Patil et al. 2019	Genotype	Accession/ genotype
Iron	Finger millet	GN-5	10.5	India	Patil et al. 2019	Genotype	Accession/ genotype
Iron	Finger millet	GPU-28	10.3	India	Patil et al. 2019	Genotype	Accession/ genotype
Iron	Finger millet	GPU-48	11	India	Patil et al. 2019	Genotype	Accession/ genotype
Iron	Finger millet	VL 146	4.87	India	Sharma et al. 2018	Genotype	Accession/ genotype
Iron	Finger millet	VL 149	5.81	India	Sharma et al. 2018	Genotype	Accession/ genotype
Iron	Finger millet	VL 201	6.13	India	Sharma et al. 2018	Genotype	Accession/ genotype
Iron	Finger millet	VL 204	4.98	India	Sharma et al. 2018	Genotype	Accession/ genotype
Iron	Finger millet	VL 283	5.29	India	Sharma et al. 2018	Genotype	Accession/ genotype
Iron	Finger millet	VL 305	5.49	India	Sharma et al. 2018	Genotype	Accession/ genotype
Iron	Finger millet	VL 312	4.35	India	Sharma et al. 2018	Genotype	Accession/ genotype
Iron	Finger millet	VL 315	3.79	India	Sharma et al. 2018	Genotype	Accession/ genotype
Iron	Finger millet	VL 324	4.5	India	Sharma et al. 2018	Genotype	Accession/ genotype
Iron	Finger millet	VL 325	5.9	India	Sharma et al. 2018	Genotype	Accession/ genotype
Iron	Finger millet	VL 328	5.51	India	Sharma et al. 2018	Genotype	Accession/ genotype
Iron	Finger millet	VL 330	5.2	India	Sharma et al. 2018	Genotype	Accession/ genotype
Iron	Finger millet	VL 332	4.68	India	Sharma et al. 2018	Genotype	Accession/ genotype
Iron	Finger millet	VL 333	5.61	India	Sharma et al. 2018	Genotype	Accession/ genotype
Iron	Finger millet	VL 336	4.52	India	Sharma et al. 2018	Genotype	Accession/ genotype
Iron	Finger millet	VL 340	5.66	India	Sharma et al. 2018	Genotype	Accession/ genotype
Iron	Finger millet	VL 342	5.99	India	Sharma et al. 2018	Genotype	Accession/ genotype
Iron	Finger millet	VL 348	5.13	India	Sharma et al. 2018	Genotype	Accession/ genotype
Iron	Finger millet	VL 351	3.99	India	Sharma et al. 2018	Genotype	Accession/ genotype
Iron	Finger millet	VL 352	3.7	India	Sharma et al. 2018	Genotype	Accession/ genotype
Iron	Finger millet	VL 357	4.79	India	Sharma et al. 2018	Genotype	Accession/ genotype
Iron	Finger millet	VL 361	6.13	India	Sharma et al. 2018	Genotype	Accession/ genotype
Iron	Finger millet	VL 367	4.44	India	Sharma et al. 2018	Genotype	Accession/ genotype
Iron	Finger millet	VL 369	4.15	India	Sharma et al. 2018	Genotype	Accession/ genotype
Iron	Finger millet	VL 370	5.69	India	Sharma et al. 2018	Genotype	Accession/ genotype
Iron	Finger millet	VL 373	5.15	India	Sharma et al. 2018	Genotype	Accession/ genotype
Iron	Finger millet	VL 374	5.93	India	Sharma et al. 2018	Genotype	Accession/ genotype
Iron	Finger millet	GE 86	6.91	India	Sharma et al. 2018	Genotype	Accession/ genotype
Iron	Finger millet	GE 440	4.77	India	Sharma et al. 2018	Genotype	Accession/ genotype
Iron	Finger millet	GPHCPB 7	5.54	India	Sharma et al. 2018	Genotype	Accession/ genotype
Iron	Finger millet	GPHCPB 3	5.77	India	Sharma et al. 2018	Genotype	Accession/ genotype
Iron	Finger millet	GPHCPB 52	5.13	India	Sharma et al. 2018	Genotype	Accession/ genotype
Iron	Finger millet	GPU4 5	4.98	India	Sharma et al. 2018	Genotype	Accession/ genotype
Iron	Finger millet	HR 374	6.16	India	Sharma et al. 2018	Genotype	Accession/ genotype
Iron	Finger millet	VR 708	4.86	India	Sharma et al. 2018	Genotype	Accession/ genotype
Iron	Finger millet	Boneya	6.01	Ethiopia	Adamassu et al. 2009	Improved variety	variety
Iron	Finger millet	Padet-1	4.59	Ethiopia	Adamassu et al. 2009	Improved variety	variety
Iron	Finger millet	PBL-1	34.15	Ethiopia	Adamassu et al. 2009	variety	variety
Iron	Finger millet	PBL-2	26.62	Ethiopia	Adamassu et al. 2009	variety	variety
Iron	Finger millet	PBL-3	27.31	Ethiopia	Adamassu et al. 2009	variety	variety
Iron	Finger millet	PBR-1	53.13	Ethiopia	Adamassu et al. 2009	variety	variety
Iron	Finger millet	PBR-2	53.39	Ethiopia	Adamassu et al. 2009	variety	variety
Iron	Finger millet	PBR-3	30.66	Ethiopia	Adamassu et al. 2009	variety	variety
Iron	Finger millet	Tadesse	6.25	Ethiopia	Adamassu et al. 2009	Improved variety	variety
Iron	Finger millet	POOLED	4.6	India, FCT	Longvah et al. 2017	Pooled variety	variety
Iron	Finger millet	POOLED	2.7	Tanzania, FCT	Lukmanji et al. 2008	Pooled variety	variety
Iron	Finger millet	POOLED	15.2	Malawi, FCT	Van Graan et al. 2019	Pooled variety	variety
Iron	Finger millet	POOLED	11.3	Kenya, FCT	Mwai 2018	Pooled variety	variety
Iron	Finger millet	POOLED	3.9	Nepal, FCT	Govt of Nepal, 2017	Pooled variety	variety
Iron	Finger millet	Raato Kodo	3.2	Nepal	Joshi et al., 2020	landraces	variety
Iron	Finger millet	VR847	2.86	India	Anitha et al. 2019	variety	variety
Iron	Finger millet	GPU28	2.64	India	Anitha et al. 2019	variety	variety
Iron	Fonio	Finiba/Kassangara	1.2	Mali	Koreissi Dembele et al. 2013	variety	variety	landraces
Iron	Fonio	Die`ni	1.8	Mali	Koreissi Dembele et al. 2013	variety	variety	landraces
Iron	Fonio	Kassangara	1.1	Mali	Koreissi Dembele et al. 2013	variety	variety	landraces
Iron	Fonio	Finiba	1.7	Mali	Koreissi Dembele et al. 2013	variety	variety	landraces
Iron	Fonio	Petema	1.2	Mali	Koreissi Dembele et al. 2013	variety	variety	landraces
Iron	Fonio	Pe´azo 1	1.7	Mali	Koreissi Dembele et al. 2013	variety	variety	landraces
Iron	Fonio	Tioi	0.9	Mali	Koreissi Dembele et al. 2013	variety	variety	landraces
Iron	Fonio	Peˆye	1.9	Mali	Koreissi Dembele et al. 2013	variety	variety	landraces
Iron	Fonio	Tama	1.3	Mali	Koreissi Dembele et al. 2013	variety	variety	landraces
Iron	Fonio	Tamatioi	0.8	Mali	Koreissi Dembele et al. 2013	variety	variety	landraces
Iron	Fonio	Tamabe´	1.2	Mali	Koreissi Dembele et al. 2013	variety	variety	landraces
Iron	Fonio	Pe´azo 2	1.2	Mali	Koreissi Dembele et al. 2013	variety	variety	landraces
Iron	Fonio (debraned)	POOLED	1.8	West Africa (FCT)	Stadlmayr et al., 2012	Pooled variety	variety
Iron	Fonio, black (whole)	POOLED	10	West Africa (FCT)	Stadlmayr et al., 2012	Pooled variety	variety
Iron	Fonio, white (whole)	POOLED	8.5	West Africa (FCT)	Stadlmayr et al., 2012	Pooled variety	variety
Iron	Foxtail millet	ISe 364	4.28		Upadhyaya et al. 2011b	accession	Accession/ genotype
Iron	Foxtail millet	ISe 388	4.09		Upadhyaya et al. 2011b	accession	Accession/ genotype
Iron	Foxtail millet	ISe 663	5.16	Switzerland	Upadhyaya et al. 2011b	accession	Accession/ genotype
Iron	Foxtail millet	ISe 710	4.54	India	Upadhyaya et al. 2011b	accession	Accession/ genotype
Iron	Foxtail millet	ISe 748	4.31	India	Upadhyaya et al. 2011b	accession	Accession/ genotype
Iron	Foxtail millet	ISe 846	5.11		Upadhyaya et al. 2011b	accession	Accession/ genotype
Iron	Foxtail millet	ISe 869	4.65		Upadhyaya et al. 2011b	accession	Accession/ genotype
Iron	Foxtail millet	ISe 969	4.94		Upadhyaya et al. 2011b	accession	Accession/ genotype
Iron	Foxtail millet	ISe 1134	5.58		Upadhyaya et al. 2011b	accession	Accession/ genotype
Iron	Foxtail millet	ISe 1151	6.8		Upadhyaya et al. 2011b	accession	Accession/ genotype
Iron	Foxtail millet	ISe 1227	4.87		Upadhyaya et al. 2011b	accession	Accession/ genotype
Iron	Foxtail millet	ISe 1254	4.98	Russia	Upadhyaya et al. 2011b	accession	Accession/ genotype
Iron	Foxtail millet	ISe 1305	6.39	Spain	Upadhyaya et al. 2011b	accession	Accession/ genotype
Iron	Foxtail millet	ISe 1312	6.19		Upadhyaya et al. 2011b	accession	Accession/ genotype
Iron	Foxtail millet	ISe 1419	5.22		Upadhyaya et al. 2011b	accession	Accession/ genotype
Iron	Foxtail millet	ISe 1458	5.48		Upadhyaya et al. 2011b	accession	Accession/ genotype
Iron	Foxtail millet	ISe 1581	6.24		Upadhyaya et al. 2011b	accession	Accession/ genotype
Iron	Foxtail millet	ISe 1610	5.1	Malawi	Upadhyaya et al. 2011b	accession	Accession/ genotype
Iron	Foxtail millet	ISe 1704	5.88		Upadhyaya et al. 2011b	accession	Accession/ genotype
Iron	Foxtail millet	ISe 1767	5.73		Upadhyaya et al. 2011b	accession	Accession/ genotype
Iron	Foxtail millet	ISe 1773	5.54		Upadhyaya et al. 2011b	accession	Accession/ genotype
Iron	Foxtail millet	ISe 1789	4.98		Upadhyaya et al. 2011b	accession	Accession/ genotype
Iron	Foxtail millet	ISe 1808	5.53		Upadhyaya et al. 2011b	accession	Accession/ genotype
Iron	Foxtail millet	ISe 1820	5.01	India	Upadhyaya et al. 2011b	accession	Accession/ genotype
Iron	Foxtail millet	ISe 1846	5.12		Upadhyaya et al. 2011b	accession	Accession/ genotype
Iron	Foxtail millet	ISe 1888	4.21	Ethiopia	Upadhyaya et al. 2011b	accession	Accession/ genotype
Iron	Foxtail millet	ISe 375	4.01	India	Upadhyaya et al. 2011b	accession	Accession/ genotype
Iron	Foxtail millet	ISe 376	4.39		Upadhyaya et al. 2011b	accession	Accession/ genotype
Iron	Foxtail millet	ISe 1468	4.86		Upadhyaya et al. 2011b	accession	Accession/ genotype
Iron	Foxtail millet	ISe 1541	4.76		Upadhyaya et al. 2011b	accession	Accession/ genotype
Iron	Foxtail millet	GS 12	8.46	India	Thippeswamy et al., 2017	genotype	Accession/ genotype
Iron	Foxtail millet	GS 64	11.36	India	Thippeswamy et al., 2017	genotype	Accession/ genotype
Iron	Foxtail millet	GS 71	7.83	India	Thippeswamy et al., 2017	genotype	Accession/ genotype
Iron	Foxtail millet	GS 78	14.48	India	Thippeswamy et al., 2017	genotype	Accession/ genotype
Iron	Foxtail millet	GS 95	5.39	India	Thippeswamy et al., 2017	genotype	Accession/ genotype
Iron	Foxtail millet	GS 106	11.42	India	Thippeswamy et al., 2017	genotype	Accession/ genotype
Iron	Foxtail millet	GS 121	16.26	India	Thippeswamy et al., 2017	genotype	Accession/ genotype
Iron	Foxtail millet	GS 213	3.83	India	Thippeswamy et al., 2017	genotype	Accession/ genotype
Iron	Foxtail millet	GS 29	1.16	India	Thippeswamy et al., 2017	genotype	Accession/ genotype
Iron	Foxtail millet	GS 221	4.94	India	Thippeswamy et al., 2017	genotype	Accession/ genotype
Iron	Foxtail millet	GS 276	8.29	India	Thippeswamy et al., 2017	genotype	Accession/ genotype
Iron	Foxtail millet	GS 293	10.23	India	Thippeswamy et al., 2017	genotype	Accession/ genotype
Iron	Foxtail millet	GS 310	14.13	India	Thippeswamy et al., 2017	genotype	Accession/ genotype
Iron	Foxtail millet	GS 510	0.33	India	Thippeswamy et al., 2017	genotype	Accession/ genotype
Iron	Foxtail millet	GS 511	5.11	India	Thippeswamy et al., 2017	genotype	Accession/ genotype
Iron	Foxtail millet	SiA 3085	4.2	India	Thippeswamy et al., 2017	genotype	Accession/ genotype
Iron	Foxtail millet	Co 7	2.47	India	Thippeswamy et al., 2017	genotype	Accession/ genotype
Iron	Foxtail millet	SiA 2644	11.09	India	Thippeswamy et al., 2017	genotype	Accession/ genotype
Iron	Foxtail millet	TNAU 186	4.06	India	Thippeswamy et al., 2017	genotype	Accession/ genotype
Iron	Foxtail millet	SR 11	4.63	India	Thippeswamy et al., 2017	genotype	Accession/ genotype
Iron	Foxtail millet	SiA 2593	2.91	India	Thippeswamy et al., 2017	genotype	Accession/ genotype
Iron	Foxtail millet	FMGPM-9	4.69	India	Thippeswamy et al., 2017	genotype	Accession/ genotype
Iron	Foxtail millet	PS 4	2.53	India	Thippeswamy et al., 2017	genotype	Accession/ genotype
Iron	Foxtail millet	HMT-100-1	2.7	India	Thippeswamy et al., 2017	genotype	Accession/ genotype
Iron	Foxtail millet	SiA 326	2.93	India	Thippeswamy et al., 2017	genotype	Accession/ genotype
Iron	Foxtail millet	Pratapkagni	4.08	India	Brunda et al. 2017	genotype	Accession/ genotype
Iron	Foxtail millet	DHF 14	4.04	India	Brunda et al. 2017	genotype	Accession/ genotype
Iron	Foxtail millet	DHF 27	3.51	India	Brunda et al. 2017	genotype	Accession/ genotype
Iron	Foxtail millet	Meera	3.37	India	Brunda et al. 2017	genotype	Accession/ genotype
Iron	Foxtail millet	Ise 931	3.14	India	Brunda et al. 2017	genotype	Accession/ genotype
Iron	Foxtail millet	DHF 26	2.86	India	Brunda et al. 2017	genotype	Accession/ genotype
Iron	Foxtail millet	RFM 10	2.76	India	Brunda et al. 2017	genotype	Accession/ genotype
Iron	Foxtail millet	DHF 2	2.54	India	Brunda et al. 2017	genotype	Accession/ genotype
Iron	Foxtail millet	CO 4	2.5	India	Brunda et al. 2017	genotype	Accession/ genotype
Iron	Foxtail millet	DHF 7	2.47	India	Brunda et al. 2017	genotype	Accession/ genotype
Iron	Foxtail millet	DHF 2	2.54	India	Brunda et al. 2017	genotype	Accession/ genotype
Iron	Foxtail millet	DHF 13	1.06	India	Brunda et al. 2017	genotype	Accession/ genotype
Iron	Foxtail millet	DHF 5	1.23	India	Brunda et al. 2017	genotype	Accession/ genotype
Iron	Foxtail millet	DHF 18	2.31	India	Brunda et al. 2017	genotype	Accession/ genotype
Iron	Foxtail millet	DHF 1	1.55	India	Brunda et al. 2017	genotype	Accession/ genotype
Iron	Foxtail millet	DHF 4	1.43	India	Brunda et al. 2017	genotype	Accession/ genotype
Iron	Foxtail millet	DHF 20	2.21	India	Brunda et al. 2017	genotype	Accession/ genotype
Iron	Foxtail millet	DHF19	1.28	India	Brunda et al. 2017	genotype	Accession/ genotype
Iron	Foxtail millet	DHF16	2.06	India	Brunda et al. 2017	genotype	Accession/ genotype
Iron	Foxtail millet	DHF 25	2.13	India	Brunda et al. 2017	genotype	Accession/ genotype
Iron	Foxtail millet	HMT 100-1	3.08	India	Brunda et al. 2017	genotype	Accession/ genotype
Iron	Foxtail millet	PS-4	4.34	India	Brunda et al. 2017	genotype	Accession/ genotype
Iron	Foxtail millet	Sia 326	1.8	India	Brunda et al. 2017	genotype	Accession/ genotype
Iron	Foxtail millet	POOLED	4.9	China, FCT	Ershow 1990	Pooled variety	variety
Iron	Foxtail millet	POOLED	12.9	Nepal, FCT	Govt of Nepal, 2017	Pooled variety	variety
Iron	Foxtail millet	Raato Kaaguno	3.53	Nepal	Joshi et al., 2020	landraces	variety
Iron	Foxtail millet	Kaalo Kaaguno	2.12	Nepal	Joshi et al., 2020	landraces	variety
Iron	Foxtail millet	Tinmaase Kaaguno	1.92	Nepal	Joshi et al., 2020	landraces	variety
Iron	Foxtail millet	Bariyo Kaaguno	5.5	Nepal	Joshi et al., 2020	landraces	variety
Iron	Foxtail millet	Ise 375	4	India	Sharma et al. 2014	accession	Accession/ genotype
Iron	Foxtail millet	Ise 376	4.39	India	Sharma et al. 2014	accession	Accession/ genotype
Iron	Foxtail millet	Ise 748	4.31	India	Sharma et al. 2014	accession	Accession/ genotype
Iron	Foxtail millet	Ise 751	4.95	India	Sharma et al. 2014	accession	Accession/ genotype
Iron	Foxtail millet	Ise 769	4.52	India	Sharma et al. 2014	accession	Accession/ genotype
Iron	Foxtail millet	Ise 771	5.22	India	Sharma et al. 2014	accession	Accession/ genotype
Iron	Foxtail millet	Ise 785	4.7	India	Sharma et al. 2014	accession	Accession/ genotype
Iron	Foxtail millet	Ise 846	5.11	India	Sharma et al. 2014	accession	Accession/ genotype
Iron	Foxtail millet	Ise 1059	6.33	India	Sharma et al. 2014	accession	Accession/ genotype
Iron	Foxtail millet	Ise 1067	4.9	India	Sharma et al. 2014	accession	Accession/ genotype
Iron	Foxtail millet	Ise 1137	5.69	Syria	Sharma et al. 2014	accession	Accession/ genotype
Iron	Foxtail millet	Ise 1181	5.18	China	Sharma et al. 2014	accession	Accession/ genotype
Iron	Foxtail millet	Ise 1187	5.86	China	Sharma et al. 2014	accession	Accession/ genotype
Iron	Foxtail millet	Ise 1201	4.2	China	Sharma et al. 2014	accession	Accession/ genotype
Iron	Foxtail millet	Ise 1204	4.84	Russia & CISs	Sharma et al. 2014	accession	Accession/ genotype
Iron	Foxtail millet	Ise 1258	5.2	Russia & CISs	Sharma et al. 2014	accession	Accession/ genotype
Iron	Foxtail millet	Ise 1286	6.6	Turkey	Sharma et al. 2014	accession	Accession/ genotype
Iron	Foxtail millet	Ise 1320	6.22	USA	Sharma et al. 2014	accession	Accession/ genotype
Iron	Foxtail millet	Ise 1335	5.5	Hungary	Sharma et al. 2014	accession	Accession/ genotype
Iron	Foxtail millet	Ise 1387	4.93	Sri Lanka	Sharma et al. 2014	accession	Accession/ genotype
Iron	Foxtail millet	Ise 1419	5.52	India	Sharma et al. 2014	accession	Accession/ genotype
Iron	Foxtail millet	Ise 1541	4.76	India	Sharma et al. 2014	accession	Accession/ genotype
Iron	Foxtail millet	Ise'1547	3.72	Korea	Sharma et al. 2014	accession	Accession/ genotype
Iron	Foxtail millet	Ise 1563	5.11	Korea	Sharma et al. 2014	accession	Accession/ genotype
Iron	Foxtail millet	Ise 1575	5.38	Korea	Sharma et al. 2014	accession	Accession/ genotype
Iron	Foxtail millet	Ise 1593	4.32	Korea	Sharma et al. 2014	accession	Accession/ genotype
Iron	Foxtail millet	Ise 1685	4.98	India	Sharma et al. 2014	accession	Accession/ genotype
Iron	Foxtail millet	Ise 1704	5.88	India	Sharma et al. 2014	accession	Accession/ genotype
Iron	Foxtail millet	Ise 1118	3.97	Syria	Sharma et al. 2014	accession	Accession/ genotype
Iron	Kodo millet	IPs 729	2.785	India	Vetriventhan and Upadhyaya 2019	accession	Accession/ genotype
Iron	Kodo millet	IPs 222	3.16	India	Vetriventhan and Upadhyaya 2019	accession	Accession/ genotype
Iron	Kodo millet	IPs 860	2.715	India	Vetriventhan and Upadhyaya 2019	accession	Accession/ genotype
Iron	Kodo millet	IPs 670	2.53	India	Vetriventhan and Upadhyaya 2019	accession	Accession/ genotype
Iron	Kodo millet	IPs 77	2.555	India	Vetriventhan and Upadhyaya 2019	accession	Accession/ genotype
Iron	Kodo millet	IPs 710	2.925	India	Vetriventhan and Upadhyaya 2019	accession	Accession/ genotype
Iron	Kodo millet	IPs 158	2.455	India	Vetriventhan and Upadhyaya 2019	accession	Accession/ genotype
Iron	Kodo millet	IPs 585	2.805	India	Vetriventhan and Upadhyaya 2019	accession	Accession/ genotype
Iron	Kodo millet	IPs 13	2.125	India	Vetriventhan and Upadhyaya 2019	accession	Accession/ genotype
Iron	Kodo millet	IPs 669	2.165	India	Vetriventhan and Upadhyaya 2019	accession	Accession/ genotype
Iron	Kodo millet	IPs 279	2.03	India	Vetriventhan and Upadhyaya 2019	accession	Accession/ genotype
Iron	Kodo millet	IPs 588	2.175	India	Vetriventhan and Upadhyaya 2019	accession	Accession/ genotype
Iron	Kodo millet	IPs 593	3.215	India	Vetriventhan and Upadhyaya 2019	accession	Accession/ genotype
Iron	Kodo millet	IPs 686	2.515	India	Vetriventhan and Upadhyaya 2019	accession	Accession/ genotype
Iron	Kodo millet	IPs 280	2.5	India	Vetriventhan and Upadhyaya 2019	accession	Accession/ genotype
Iron	Kodo millet	IPs 689	2.73	India	Vetriventhan and Upadhyaya 2019	accession	Accession/ genotype
Iron	Kodo millet	IPs 4	2.715	India	Vetriventhan and Upadhyaya 2019	accession	Accession/ genotype
Iron	Kodo millet	IPs 274	2.075	India	Vetriventhan and Upadhyaya 2019	accession	Accession/ genotype
Iron	Kodo millet	IPs 264	2.465	India	Vetriventhan and Upadhyaya 2019	accession	Accession/ genotype
Iron	Kodo millet	IPs 614	2.47	India	Vetriventhan and Upadhyaya 2019	accession	Accession/ genotype
Iron	Kodo millet	IPs 881	2.925	India	Vetriventhan and Upadhyaya 2019	accession	Accession/ genotype
Iron	Kodo millet	IPs 5	2.31	India	Vetriventhan and Upadhyaya 2019	accession	Accession/ genotype
Iron	Kodo millet	IPs 575	2.165	India	Vetriventhan and Upadhyaya 2019	accession	Accession/ genotype
Iron	Kodo millet	IPs 86	2.48	India	Vetriventhan and Upadhyaya 2019	accession	Accession/ genotype
Iron	Kodo millet	IPs 9	2.685	India	Vetriventhan and Upadhyaya 2019	accession	Accession/ genotype
Iron	Kodo millet	IPs 83	2.915	India	Vetriventhan and Upadhyaya 2019	accession	Accession/ genotype
Iron	Kodo millet	IPs 814	3.35	India	Vetriventhan and Upadhyaya 2019	accession	Accession/ genotype
Iron	Kodo millet	IPs 339	3	India	Vetriventhan and Upadhyaya 2019	accession	Accession/ genotype
Iron	Kodo millet	IPs 287	2.315	India	Vetriventhan and Upadhyaya 2019	accession	Accession/ genotype
Iron	Kodo millet	IPs 699	2.295	India	Vetriventhan and Upadhyaya 2019	accession	Accession/ genotype
Iron	Kodo millet	RK 111	20.48	India	Nirubana et al. 2017	genotype	Accession/ genotype
Iron	Kodo millet	TNAU 197	24.56	India	Nirubana et al. 2017	genotype	Accession/ genotype
Iron	Kodo millet	TNAU 191	24.27	India	Nirubana et al. 2017	genotype	Accession/ genotype
Iron	Kodo millet	TNAU 140	24.69	India	Nirubana et al. 2017	genotype	Accession/ genotype
Iron	Kodo millet	Aamo 89	6.93	India	Nirubana et al. 2017	genotype	Accession/ genotype
Iron	Kodo millet	Aamo 90	6.93	India	Nirubana et al. 2017	genotype	Accession/ genotype
Iron	Kodo millet	RK 50	15.56	India	Nirubana et al. 2017	genotype	Accession/ genotype
Iron	Kodo millet	APK 1	7.73	India	Nirubana et al. 2017	genotype	Accession/ genotype
Iron	Kodo millet	TNAU 155	15.67	India	Nirubana et al. 2017	genotype	Accession/ genotype
Iron	Kodo millet	TNAU 236	15.67	India	Nirubana et al. 2017	genotype	Accession/ genotype
Iron	Kodo millet	TNAU 149	15.67	India	Nirubana et al. 2017	genotype	Accession/ genotype
Iron	Kodo millet	CO3	15.67	India	Nirubana et al. 2017	genotype	Accession/ genotype
Iron	Kodo millet	Sel 20	15.74	India	Nirubana et al. 2017	genotype	Accession/ genotype
Iron	Kodo millet	GPUK 3	15.74	India	Nirubana et al. 2017	genotype	Accession/ genotype
Iron	Kodo millet	TNAU 85	15.74	India	Nirubana et al. 2017	genotype	Accession/ genotype
Iron	Kodo millet	TNAU 82	15.74	India	Nirubana et al. 2017	genotype	Accession/ genotype
Iron	Kodo millet	IPS 113	15.74	India	Nirubana et al. 2017	genotype	Accession/ genotype
Iron	Kodo millet	TNAU 133	15.74	India	Nirubana et al. 2017	genotype	Accession/ genotype
Iron	Kodo millet	DPS 95	15.74	India	Nirubana et al. 2017	genotype	Accession/ genotype
Iron	Kodo millet	Sel 15	15.74	India	Nirubana et al. 2017	genotype	Accession/ genotype
Iron	Kodo millet	TNAU 129	15.74	India	Nirubana et al. 2017	genotype	Accession/ genotype
Iron	Kodo millet	RK 162	15.74	India	Nirubana et al. 2017	genotype	Accession/ genotype
Iron	Kodo millet	Sel 18	15.74	India	Nirubana et al. 2017	genotype	Accession/ genotype
Iron	Kodo millet	TNAU 128	15.74	India	Nirubana et al. 2017	genotype	Accession/ genotype
Iron	Kodo millet	TNAU 154	15.74	India	Nirubana et al. 2017	genotype	Accession/ genotype
Iron	Kodo millet	Sel 21	10.96	India	Nirubana et al. 2017	genotype	Accession/ genotype
Iron	Kodo millet	TNAU 188	10.96	India	Nirubana et al. 2017	genotype	Accession/ genotype
Iron	Kodo millet	TNAU 187	10.96	India	Nirubana et al. 2017	genotype	Accession/ genotype
Iron	Kodo millet	TNAU 102	10.96	India	Nirubana et al. 2017	genotype	Accession/ genotype
Iron	Kodo millet	TNAU 162	10.96	India	Nirubana et al. 2017	genotype	Accession/ genotype
Iron	Kodo millet	TNAU 164	10.96	India	Nirubana et al. 2017	genotype	Accession/ genotype
Iron	Kodo millet	RBK 155	10.96	India	Nirubana et al. 2017	genotype	Accession/ genotype
Iron	Kodo millet	Sel 16	10.96	India	Nirubana et al. 2017	genotype	Accession/ genotype
Iron	Kodo millet	TNAU 127	10.96	India	Nirubana et al. 2017	genotype	Accession/ genotype
Iron	Kodo millet	TNAU 201	10.96	India	Nirubana et al. 2017	genotype	Accession/ genotype
Iron	Kodo millet	Aamo 126	10.96	India	Nirubana et al. 2017	genotype	Accession/ genotype
Iron	Kodo millet	TNAU 171	10.96	India	Nirubana et al. 2017	genotype	Accession/ genotype
Iron	Kodo millet	Aamo 258	10.96	India	Nirubana et al. 2017	genotype	Accession/ genotype
Iron	Kodo millet	TNAU 86	10.96	India	Nirubana et al. 2017	genotype	Accession/ genotype
Iron	Kodo millet	Aemo 101	15.55	India	Nirubana et al. 2017	genotype	Accession/ genotype
Iron	Kodo millet	TNAU 108	15.55	India	Nirubana et al. 2017	genotype	Accession/ genotype
Iron	Kodo millet	TNAU 120	15.55	India	Nirubana et al. 2017	genotype	Accession/ genotype
Iron	Kodo millet	TNAU 130	15.55	India	Nirubana et al. 2017	genotype	Accession/ genotype
Iron	Kodo millet	TNAU 111	15.55	India	Nirubana et al. 2017	genotype	Accession/ genotype
Iron	Kodo millet	TNAU 104	15.55	India	Nirubana et al. 2017	genotype	Accession/ genotype
Iron	Kodo millet	TNAU 137	15.55	India	Nirubana et al. 2017	genotype	Accession/ genotype
Iron	Kodo millet	IPS 102	15.55	India	Nirubana et al. 2017	genotype	Accession/ genotype
Iron	Kodo millet	TNAU 146	15.55	India	Nirubana et al. 2017	genotype	Accession/ genotype
Iron	Kodo millet	TNAU 148	15.55	India	Nirubana et al. 2017	genotype	Accession/ genotype
Iron	Kodo millet	TNAU 123	15.55	India	Nirubana et al. 2017	genotype	Accession/ genotype
Iron	Kodo millet	RK 82	15.55	India	Nirubana et al. 2017	genotype	Accession/ genotype
Iron	Kodo millet	TNAU 150	15.55	India	Nirubana et al. 2017	genotype	Accession/ genotype
Iron	Kodo millet	TNAU 153	15.55	India	Nirubana et al. 2017	genotype	Accession/ genotype
Iron	Kodo millet	Sel 16	15.55	India	Nirubana et al. 2017	genotype	Accession/ genotype
Iron	Kodo millet	TNAU 105	15.55	India	Nirubana et al. 2017	genotype	Accession/ genotype
Iron	Kodo millet	TNAU 151	15.55	India	Nirubana et al. 2017	genotype	Accession/ genotype
Iron	Kodo millet	RK 51	15.55	India	Nirubana et al. 2017	genotype	Accession/ genotype
Iron	Kodo millet	TNAU 141	15.55	India	Nirubana et al. 2017	genotype	Accession/ genotype
Iron	Kodo millet	Sel 12	15.55	India	Nirubana et al. 2017	genotype	Accession/ genotype
Iron	Kodo millet	TNAU 98	15.55	India	Nirubana et al. 2017	genotype	Accession/ genotype
Iron	Kodo millet	TNAU 90	15.55	India	Nirubana et al. 2017	genotype	Accession/ genotype
Iron	Kodo millet	IPS 122	15.55	India	Nirubana et al. 2017	genotype	Accession/ genotype
Iron	Kodo millet	TNAU 93	15.55	India	Nirubana et al. 2017	genotype	Accession/ genotype
Iron	Kodo millet	Sel 1	15.55	India	Nirubana et al. 2017	genotype	Accession/ genotype
Iron	Kodo millet	ICK 1042	15.55	India	Nirubana et al. 2017	genotype	Accession/ genotype
Iron	Kodo millet	TNAU 152	15.55	India	Nirubana et al. 2017	genotype	Accession/ genotype
Iron	Kodo millet	IPS 125	15.55	India	Nirubana et al. 2017	genotype	Accession/ genotype
Iron	Kodo millet	IPS 123	15.55	India	Nirubana et al. 2017	genotype	Accession/ genotype
Iron	Kodo millet	TNAU 99	15.55	India	Nirubana et al. 2017	genotype	Accession/ genotype
Iron	Kodo millet	TNAU 165	15.55	India	Nirubana et al. 2017	genotype	Accession/ genotype
Iron	Kodo millet	TNAU 172	15.55	India	Nirubana et al. 2017	genotype	Accession/ genotype
Iron	Kodo millet	TNAU 92	15.55	India	Nirubana et al. 2017	genotype	Accession/ genotype
Iron	Kodo millet	ICK 7114	15.55	India	Nirubana et al. 2017	genotype	Accession/ genotype
Iron	Kodo millet	ICK 86	15.55	India	Nirubana et al. 2017	genotype	Accession/ genotype
Iron	Kodo millet	RBK 73	15.55	India	Nirubana et al. 2017	genotype	Accession/ genotype
Iron	Kodo millet	TNAU 174	15.55	India	Nirubana et al. 2017	genotype	Accession/ genotype
Iron	Kodo millet	TNAU 91	15.55	India	Nirubana et al. 2017	genotype	Accession/ genotype
Iron	Kodo millet	TNAU 177	15.55	India	Nirubana et al. 2017	genotype	Accession/ genotype
Iron	Kodo millet	TNAU 195	15.55	India	Nirubana et al. 2017	genotype	Accession/ genotype
Iron	Kodo millet	TNAU 190	15.55	India	Nirubana et al. 2017	genotype	Accession/ genotype
Iron	Kodo millet	Aamo 271	15.55	India	Nirubana et al. 2017	genotype	Accession/ genotype
Iron	Kodo millet	Sel 14	15.55	India	Nirubana et al. 2017	genotype	Accession/ genotype
Iron	Kodo millet	Sel 11	15.55	India	Nirubana et al. 2017	genotype	Accession/ genotype
Iron	Kodo millet	TNAU 107	15.55	India	Nirubana et al. 2017	genotype	Accession/ genotype
Iron	Kodo millet	Aamo 68	15.55	India	Nirubana et al. 2017	genotype	Accession/ genotype
Iron	Kodo millet	Aamo 83	15.55	India	Nirubana et al. 2017	genotype	Accession/ genotype
Iron	Kodo millet	TNAU 180	15.55	India	Nirubana et al. 2017	genotype	Accession/ genotype
Iron	Kodo millet	TNAU 109	15.55	India	Nirubana et al. 2017	genotype	Accession/ genotype
Iron	Kodo millet	IPS 118	15.55	India	Nirubana et al. 2017	genotype	Accession/ genotype
Iron	Kodo millet	TNAU 179	15.55	India	Nirubana et al. 2017	genotype	Accession/ genotype
Iron	Kodo millet	POOLED	2.34	India, FCT	Longvah et al. 2017	pooled variety	variety
Iron	Little millet	TNPsu 1/79	5.39	India	Manimozhi et al. 2015	genotype	Accession/ genotype
Iron	Little millet	TNPsu 9	4.67	India	Manimozhi et al. 2015	genotype	Accession/ genotype
Iron	Little millet	TNPsu 12	4.1	India	Manimozhi et al. 2015	genotype	Accession/ genotype
Iron	Little millet	TNPsu 13	3.15	India	Manimozhi et al. 2015	genotype	Accession/ genotype
Iron	Little millet	TNPsu 17	3.4	India	Manimozhi et al. 2015	genotype	Accession/ genotype
Iron	Little millet	TNPsu 18	3.2	India	Manimozhi et al. 2015	genotype	Accession/ genotype
Iron	Little millet	TNPsu 19	3.76	India	Manimozhi et al. 2015	genotype	Accession/ genotype
Iron	Little millet	TNPsu 21	5.88	India	Manimozhi et al. 2015	genotype	Accession/ genotype
Iron	Little millet	TNPsu 22	19.22	India	Manimozhi et al. 2015	genotype	Accession/ genotype
Iron	Little millet	TNPsu 23	23.38	India	Manimozhi et al. 2015	genotype	Accession/ genotype
Iron	Little millet	TNPsu 25	4.62	India	Manimozhi et al. 2015	genotype	Accession/ genotype
Iron	Little millet	TNPsu 27	3.85	India	Manimozhi et al. 2015	genotype	Accession/ genotype
Iron	Little millet	TNPsu 28	3.17	India	Manimozhi et al. 2015	genotype	Accession/ genotype
Iron	Little millet	TNPsu 141	4.32	India	Manimozhi et al. 2015	genotype	Accession/ genotype
Iron	Little millet	MS 110	4.32	India	Manimozhi et al. 2015	genotype	Accession/ genotype
Iron	Little millet	MS 509	4	India	Manimozhi et al. 2015	genotype	Accession/ genotype
Iron	Little millet	MS 1003/1	1.66	India	Manimozhi et al. 2015	genotype	Accession/ genotype
Iron	Little millet	MS 1211	2.02	India	Manimozhi et al. 2015	genotype	Accession/ genotype
Iron	Little millet	MS 1236	2.46	India	Manimozhi et al. 2015	genotype	Accession/ genotype
Iron	Little millet	MS 1826	2.24	India	Manimozhi et al. 2015	genotype	Accession/ genotype
Iron	Little millet	MS 3969	8.33	India	Manimozhi et al. 2015	genotype	Accession/ genotype
Iron	Little millet	MS 4684	1.93	India	Manimozhi et al. 2015	genotype	Accession/ genotype
Iron	Little millet	MS 4700	1.49	India	Manimozhi et al. 2015	genotype	Accession/ genotype
Iron	Little millet	MS 4784	2.57	India	Manimozhi et al. 2015	genotype	Accession/ genotype
Iron	Little millet	PM 29	4.29	India	Manimozhi et al. 2015	genotype	Accession/ genotype
Iron	Little millet	IPmr 886	3	India	Manimozhi et al. 2015	genotype	Accession/ genotype
Iron	Little millet	CO 2	4.07	India	Manimozhi et al. 2015	genotype	Accession/ genotype
Iron	Little millet	CO 3	4.4	India	Manimozhi et al. 2015	genotype	Accession/ genotype
Iron	Little millet	CO (Samai ) 4	4.45	India	Manimozhi et al. 2015	genotype	Accession/ genotype
Iron	Little millet	OLM 203	5.22	India	Manimozhi et al. 2015	genotype	Accession/ genotype
Iron	Little millet	POOLED	1.26	India, FCT	Longvah et al. 2017	pooled variety	variety
Iron	Little millet	IPmr 807	3.275	India	Vetriventhan et al. 2021	accession	Accession/ genotype
Iron	Little millet	IPmr 825	2.44	India	Vetriventhan et al. 2021	accession	Accession/ genotype
Iron	Little millet	IPmr 983	2.5	India	Vetriventhan et al. 2021	accession	Accession/ genotype
Iron	Little millet	IPmr 417	3.15	India	Vetriventhan et al. 2021	accession	Accession/ genotype
Iron	Little millet	IPmr 808	2.97	India	Vetriventhan et al. 2021	accession	Accession/ genotype
Iron	Little millet	IPmr 738	3.075	India	Vetriventhan et al. 2021	accession	Accession/ genotype
Iron	Little millet	IPmr 741	1.72	India	Vetriventhan et al. 2021	accession	Accession/ genotype
Iron	Little millet	IPmr 814	3.425	India	Vetriventhan et al. 2021	accession	Accession/ genotype
Iron	Little millet	IPmr 1069	2.19	India	Vetriventhan et al. 2021	accession	Accession/ genotype
Iron	Little millet	IPmr 1063	2.99	India	Vetriventhan et al. 2021	accession	Accession/ genotype
Iron	Little millet	IPmr 1036	2.665	India	Vetriventhan et al. 2021	accession	Accession/ genotype
Iron	Little millet	IPmr 1040	2.665	India	Vetriventhan et al. 2021	accession	Accession/ genotype
Iron	Little millet	IPmr 891	2.485	India	Vetriventhan et al. 2021	accession	Accession/ genotype
Iron	Little millet	IPmr 862	2.845	India	Vetriventhan et al. 2021	accession	Accession/ genotype
Iron	Little millet	IPmr 1042	2.415	India	Vetriventhan et al. 2021	accession	Accession/ genotype
Iron	Little millet	IPmr 1035	2.84	India	Vetriventhan et al. 2021	accession	Accession/ genotype
Iron	Little millet	IPmr 712	2.555	India	Vetriventhan et al. 2021	accession	Accession/ genotype
Iron	Little millet	IPmr 855	2.79	India	Vetriventhan et al. 2021	accession	Accession/ genotype
Iron	Little millet	IPmr 991	2.445	India	Vetriventhan et al. 2021	accession	Accession/ genotype
Iron	Little millet	IPmr 1000	2.48	India	Vetriventhan et al. 2021	accession	Accession/ genotype
Iron	Little millet	IPmr 974	3.28	India	Vetriventhan et al. 2021	accession	Accession/ genotype
Iron	Little millet	IPmr 877	2.77	India	Vetriventhan et al. 2021	accession	Accession/ genotype
Iron	Little millet	IPmr 875	3.415	India	Vetriventhan et al. 2021	accession	Accession/ genotype
Iron	Little millet	IPmr 1006	3.095	India	Vetriventhan et al. 2021	accession	Accession/ genotype
Iron	Little millet	IPmr 699	3.08	India	Vetriventhan et al. 2021	accession	Accession/ genotype
Iron	Little millet	IPmr 913	3.275	India	Vetriventhan et al. 2021	accession	Accession/ genotype
Iron	Little millet	IPmr 1037	3.42	India	Vetriventhan et al. 2021	accession	Accession/ genotype
Iron	Little millet	IPmr 997	2.695	India	Vetriventhan et al. 2021	accession	Accession/ genotype
Iron	Little millet	IPmr 897	2.495	India	Vetriventhan et al. 2021	accession	Accession/ genotype
Iron	Little millet	IPmr 700	2.86	India	Vetriventhan et al. 2021	accession	Accession/ genotype
Iron	Little millet	IPmr 1057	2.32	India	Vetriventhan et al. 2021	accession	Accession/ genotype
Iron	Little millet	IPmr 993	2.485	India	Vetriventhan et al. 2021	accession	Accession/ genotype
Iron	Little millet	IPmr 866	2.545	India	Vetriventhan et al. 2021	accession	Accession/ genotype
Iron	Little millet	IPmr 902	2.375	India	Vetriventhan et al. 2021	accession	Accession/ genotype
Iron	Little millet	IPmr 881	2.83	India	Vetriventhan et al. 2021	accession	Accession/ genotype
Iron	Pearl millet	ICTP8203	8.63	India	Finkelstein et al., 2013	biofortified pearl millet	variety
Iron	Pearl millet	DG9444	2.18	India	Finkelstein et al., 2013	biofortified pearl millet	variety
Iron	Pearl millet	DG9444	2.5	Harvest plus, India	Cercamondi et al., 2013	biofortified pearl millet	variety
Iron	Pearl millet	ICTP8203	8.8	Harvest plus, India	Cercamondi et al., 2013	biofortified pearl millet	variety
Iron	Pearl millet	IP 10820	10.691	Sudan	Manwaring 2018	genotype	Accession/ genotype
Iron	Pearl millet	IP 10964	5.982	Kenya	Manwaring 2018	genotype	Accession/ genotype
Iron	Pearl millet	IP 9407	9.555	Ghana	Manwaring 2018	genotype	Accession/ genotype
Iron	Pearl millet	IP 20349	9.223	Yemen	Manwaring 2018	genotype	Accession/ genotype
Iron	Pearl millet	IP 11229	6.494	Zimbabwe	Manwaring 2018	genotype	Accession/ genotype
Iron	Pearl millet	IP 13370	6.628	Tanzania	Manwaring 2018	genotype	Accession/ genotype
Iron	Pearl millet	IP 11353	5.576	Burkina Faso	Manwaring 2018	genotype	Accession/ genotype
Iron	Pearl millet	IP 18157	7.571	Mali	Manwaring 2018	genotype	Accession/ genotype
Iron	Pearl millet	IP 13964	9.337	Zimbabwe	Manwaring 2018	genotype	Accession/ genotype
Iron	Pearl millet	IP 4965	6.506	Uganda	Manwaring 2018	genotype	Accession/ genotype
Iron	Pearl millet	ICMB 90111-P6	6.148	India	Manwaring 2018	genotype	Accession/ genotype
Iron	Pearl millet	IP 6101	7.825	Niger	Manwaring 2018	genotype	Accession/ genotype
Iron	Pearl millet	IP 10488	8.36	Zimbabwe	Manwaring 2018	genotype	Accession/ genotype
Iron	Pearl millet	IP 13149	6.932	Niger	Manwaring 2018	genotype	Accession/ genotype
Iron	Pearl millet	IP 15533	4.552	Burkina Faso	Manwaring 2018	genotype	Accession/ genotype
Iron	Pearl millet	IP 10140	9.599	Mali	Manwaring 2018	genotype	Accession/ genotype
Iron	Pearl millet	IP 12925	9.896	Unknown	Manwaring 2018	genotype	Accession/ genotype
Iron	Pearl millet	IP 3890	6.69	India	Manwaring 2018	genotype	Accession/ genotype
Iron	Pearl millet	IP 11677	6.126	Sudan	Manwaring 2018	genotype	Accession/ genotype
Iron	Pearl millet	IP 11984	5.439	Nigeria	Manwaring 2018	genotype	Accession/ genotype
Iron	Pearl millet	IP 3175	7.63	India	Manwaring 2018	genotype	Accession/ genotype
Iron	Pearl millet	W 504-1-P1	5.468	India	Manwaring 2018	genotype	Accession/ genotype
Iron	Pearl millet	IP 22455	5.061	India	Manwaring 2018	genotype	Accession/ genotype
Iron	Pearl millet	IP 16096	6.013	India	Manwaring 2018	genotype	Accession/ genotype
Iron	Pearl millet	IP 6060	7.323	Central African Republic	Manwaring 2018	genotype	Accession/ genotype
Iron	Pearl millet	IP 7633	8.625	India	Manwaring 2018	genotype	Accession/ genotype
Iron	Pearl millet	IP 19386	7.37	Namibia	Manwaring 2018	genotype	Accession/ genotype
Iron	Pearl millet	IP 6112	7.262	Niger	Manwaring 2018	genotype	Accession/ genotype
Iron	Pearl millet	IP 3757	9.024	India	Manwaring 2018	genotype	Accession/ genotype
Iron	Pearl millet	IP 18147	6.57	Pakistan	Manwaring 2018	genotype	Accession/ genotype
Iron	Pearl millet	IP 19448	5.203	Namibia	Manwaring 2018	genotype	Accession/ genotype
Iron	Pearl millet	ICMS 7703	4.369	India	Manwaring 2018	genotype	Accession/ genotype
Iron	Pearl millet	IP 11577	4.518	Burkina Faso	Manwaring 2018	genotype	Accession/ genotype
Iron	Pearl millet	GB 8735	10.288	India	Manwaring 2018	genotype	Accession/ genotype
Iron	Pearl millet	OKASHANA (ICMV 88908)	5.707	India	Manwaring 2018	genotype	Accession/ genotype
Iron	Pearl millet	IP 9446	11.14	Ghana	Manwaring 2018	genotype	Accession/ genotype
Iron	Pearl millet	IP 21155	6.963	USA	Manwaring 2018	genotype	Accession/ genotype
Iron	Pearl millet	IP 11211	6.176	India	Manwaring 2018	genotype	Accession/ genotype
Iron	Pearl millet	IP6745	5.473	Malawi	Manwaring 2018	genotype	Accession/ genotype
Iron	Pearl millet	IP 10705	7.621	Mali	Manwaring 2018	genotype	Accession/ genotype
Iron	Pearl millet	GICKV 93191 (=ICMP 93191)	5.397	India	Manwaring 2018	genotype	Accession/ genotype
Iron	Pearl millet	AIMP 92901	6.45	India	Manwaring 2018	genotype	Accession/ genotype
Iron	Pearl millet	IP 18132	4.409	Pakistan	Manwaring 2018	genotype	Accession/ genotype
Iron	Pearl millet	PRLT 2/89-33	6.08	India	Manwaring 2018	genotype	Accession/ genotype
Iron	Pearl millet	IP4020	6.086	India	Manwaring 2018	genotype	Accession/ genotype
Iron	Pearl millet	IP 13971	3.687	Zimbabwe	Manwaring 2018	genotype	Accession/ genotype
Iron	Pearl millet	IP 8767	4.35	Botswana	Manwaring 2018	genotype	Accession/ genotype
Iron	Pearl millet	863B-P2	11.784	India	Manwaring 2018	genotype	Accession/ genotype
Iron	Pearl millet	ICTP 8203	13.527	India	Manwaring 2018	genotype	Accession/ genotype
Iron	Pearl millet	IP4542	8.667	India	Manwaring 2018	genotype	Accession/ genotype
Iron	Pearl millet	IP17720	9.667	Togo	Manwaring 2018	genotype	Accession/ genotype
Iron	Pearl millet	H 77/833-2-P5 (NT)	5.866	India	Manwaring 2018	genotype	Accession/ genotype
Iron	Pearl millet	843B	5.846	India	Manwaring 2018	genotype	Accession/ genotype
Iron	Pearl millet	IP 6102	7.513	Niger	Manwaring 2018	genotype	Accession/ genotype
Iron	Pearl millet	IP 3616	3.711	India	Manwaring 2018	genotype	Accession/ genotype
Iron	Pearl millet	IP 18293-P152	8.544	Unknown	Manwaring 2018	genotype	Accession/ genotype
Iron	Pearl millet	IP 22419	4.077	India	Manwaring 2018	genotype	Accession/ genotype
Iron	Pearl millet	IP 11765	3.724	South Africa	Manwaring 2018	genotype	Accession/ genotype
Iron	Pearl millet	IP 6869	6.064	Kenya	Manwaring 2018	genotype	Accession/ genotype
Iron	Pearl millet	IP 10394	5.294	India	Manwaring 2018	genotype	Accession/ genotype
Iron	Pearl millet	IP 21517	5.518	Niger	Manwaring 2018	genotype	Accession/ genotype
Iron	Pearl millet	ICMV-IS 92222	6.547	India	Manwaring 2018	genotype	Accession/ genotype
Iron	Pearl millet	IP 12839	6.544	Botswana	Manwaring 2018	genotype	Accession/ genotype
Iron	Pearl millet	IP 3732	5.697	India	Manwaring 2018	genotype	Accession/ genotype
Iron	Pearl millet	IP 8210	7.996	India	Manwaring 2018	genotype	Accession/ genotype
Iron	Pearl millet	IP 7108	8.158	India	Manwaring 2018	genotype	Accession/ genotype
Iron	Pearl millet	IP 5272	6.627	Niger	Manwaring 2018	genotype	Accession/ genotype
Iron	Pearl millet	IP 7910	3.455	Niger	Manwaring 2018	genotype	Accession/ genotype
Iron	Pearl millet	IP 9391	8.679	Ghana	Manwaring 2018	genotype	Accession/ genotype
Iron	Pearl millet	IP 3471	4.828	India	Manwaring 2018	genotype	Accession/ genotype
Iron	Pearl millet	IP 3636	4.305	India	Manwaring 2018	genotype	Accession/ genotype
Iron	Pearl millet	IP 9710	7.795	Nigeria	Manwaring 2018	genotype	Accession/ genotype
Iron	Pearl millet	IP 3132	6.819	India	Manwaring 2018	genotype	Accession/ genotype
Iron	Pearl millet	IP 6037	3.594	Central African Republic	Manwaring 2018	genotype	Accession/ genotype
Iron	Pearl millet	IP 5713	7.177	Nigeria	Manwaring 2018	genotype	Accession/ genotype
Iron	Pearl millet	IP 6146	3.859	Cameroon	Manwaring 2018	genotype	Accession/ genotype
Iron	Pearl millet	ICMB89111-P2	4.851	India	Manwaring 2018	genotype	Accession/ genotype
Iron	Pearl millet	IP 6460	10.023	Mali	Manwaring 2018	genotype	Accession/ genotype
Iron	Pearl millet	ICMV 221= ICMV88904	5.158	India	Manwaring 2018	genotype	Accession/ genotype
Iron	Pearl millet	IP 4979	6.769	Nigeria	Manwaring 2018	genotype	Accession/ genotype
Iron	Pearl millet	IP 9351	7.935	Ghana	Manwaring 2018	genotype	Accession/ genotype
Iron	Pearl millet	IP 10539	5.811	Senegal	Manwaring 2018	genotype	Accession/ genotype
Iron	Pearl millet	IP 11310	6.272	Burkina Faso	Manwaring 2018	genotype	Accession/ genotype
Iron	Pearl millet	IP 15344	11.141	India	Manwaring 2018	genotype	Accession/ genotype
Iron	Pearl millet	IP 12058	5.16	Nigeria	Manwaring 2018	genotype	Accession/ genotype
Iron	Pearl millet	IP 19626	4.722	Niger	Manwaring 2018	genotype	Accession/ genotype
Iron	Pearl millet	Tift 186	7.227	USA	Manwaring 2018	genotype	Accession/ genotype
Iron	Pearl millet	IP 16403	7.045	Zimbabwe	Manwaring 2018	genotype	Accession/ genotype
Iron	Pearl millet	IP 2058	5.626	Nigeria	Manwaring 2018	genotype	Accession/ genotype
Iron	Pearl millet	IP 12845	5.693	Burkina Faso	Manwaring 2018	genotype	Accession/ genotype
Iron	Pearl millet	IP 5695	5.986	Nigeria	Manwaring 2018	genotype	Accession/ genotype
Iron	Pearl millet	IP 15320	4.195	India	Manwaring 2018	genotype	Accession/ genotype
Iron	Pearl millet	IP 8280	5.663	India	Manwaring 2018	genotype	Accession/ genotype
Iron	Pearl millet	IP 3557	5.656	India	Manwaring 2018	genotype	Accession/ genotype
Iron	Pearl millet	IP 10271	4.584	Nigeria	Manwaring 2018	genotype	Accession/ genotype
Iron	Pearl millet	IP 8761	5.796	Botswana	Manwaring 2018	genotype	Accession/ genotype
Iron	Pearl millet	IP 9532	7.734	Ghana	Manwaring 2018	genotype	Accession/ genotype
Iron	Pearl millet	IP 8955	12.459	Togo	Manwaring 2018	genotype	Accession/ genotype
Iron	Pearl millet	IP 8344	8.705	India	Manwaring 2018	genotype	Accession/ genotype
Iron	Pearl millet	IP 8275	5.731	India	Manwaring 2018	genotype	Accession/ genotype
Iron	Pearl millet	IP 10379	4.949	Nigeria	Manwaring 2018	genotype	Accession/ genotype
Iron	Pearl millet	IP 7095	4.435	India	Manwaring 2018	genotype	Accession/ genotype
Iron	Pearl millet	IP 9406	11.395	Ghana	Manwaring 2018	genotype	Accession/ genotype
Iron	Pearl millet	IP 17554	6.874	Togo	Manwaring 2018	genotype	Accession/ genotype
Iron	Pearl millet	IP 11311	3.678	Burkina Faso	Manwaring 2018	genotype	Accession/ genotype
Iron	Pearl millet	IP8166	3.912	India	Manwaring 2018	genotype	Accession/ genotype
Iron	Pearl millet	IP 9969	4.043	Zambia	Manwaring 2018	genotype	Accession/ genotype
Iron	Pearl millet	IP 10543	5.122	Mali	Manwaring 2018	genotype	Accession/ genotype
Iron	Pearl millet	IP 7930	5.091	India	Manwaring 2018	genotype	Accession/ genotype
Iron	Pearl millet	WSIL-P8	4.924	India	Manwaring 2018	genotype	Accession/ genotype
Iron	Pearl millet	IP 18090	4.197	Pakistan	Manwaring 2018	genotype	Accession/ genotype
Iron	Pearl millet	P 1449-2-P1	5.068	Unknown	Manwaring 2018	genotype	Accession/ genotype
Iron	Pearl millet	IP 4927	5.392	Senegal	Manwaring 2018	genotype	Accession/ genotype
Iron	Pearl millet	IP 6882	6.994	Kenya	Manwaring 2018	genotype	Accession/ genotype
Iron	Pearl millet	IP 5253	6.964	Niger	Manwaring 2018	genotype	Accession/ genotype
Iron	Pearl millet	IP 18500	5.173	Namibia	Manwaring 2018	genotype	Accession/ genotype
Iron	Pearl millet	IP 8863	3.706	Zambia	Manwaring 2018	genotype	Accession/ genotype
Iron	Pearl millet	IP 11346	3.925	Burkina Faso	Manwaring 2018	genotype	Accession/ genotype
Iron	Pearl millet	IP 8069	7.088	India	Manwaring 2018	genotype	Accession/ genotype
Iron	Pearl millet	IP 4828	7.008	India	Manwaring 2018	genotype	Accession/ genotype
Iron	Pearl millet	IP 19584	7.143	Niger	Manwaring 2018	genotype	Accession/ genotype
Iron	Pearl millet	IP 5207	6.095	Niger	Manwaring 2018	genotype	Accession/ genotype
Iron	Pearl millet	IP 11275	4.564	Burkina Faso	Manwaring 2018	genotype	Accession/ genotype
Iron	Pearl millet	SOSAT-C88	4.961	India	Manwaring 2018	genotype	Accession/ genotype
Iron	Pearl millet	IP6417	5.629	Mali	Manwaring 2018	genotype	Accession/ genotype
Iron	Pearl millet	IP 14439	4.799	Cameroon	Manwaring 2018	genotype	Accession/ genotype
Iron	Pearl millet	IP 9651	3.433	Nigeria	Manwaring 2018	genotype	Accession/ genotype
Iron	Pearl millet	LGD1-B-10	5.997	Unknown	Manwaring 2018	genotype	Accession/ genotype
Iron	Pearl millet	IP 5131	5.622	Niger	Manwaring 2018	genotype	Accession/ genotype
Iron	Pearl millet	IP 8187	4.279	India	Manwaring 2018	genotype	Accession/ genotype
Iron	Pearl millet	WC-C75	6.751	India	Manwaring 2018	genotype	Accession/ genotype
Iron	Pearl millet	81-B-P6	5.007	India	Manwaring 2018	genotype	Accession/ genotype
Iron	Pearl millet	IP 13927	5.486	Zimbabwe	Manwaring 2018	genotype	Accession/ genotype
Iron	Pearl millet	IP 12967	5.338	Malawi	Manwaring 2018	genotype	Accession/ genotype
Iron	Pearl millet	ICMP 451-P8	7.234	India	Manwaring 2018	genotype	Accession/ genotype
Iron	Pearl millet	ICMP 85410-P7	3.669	India	Manwaring 2018	genotype	Accession/ genotype
Iron	Pearl millet	IP 15872	5.689	Tanzania	Manwaring 2018	genotype	Accession/ genotype
Iron	Pearl millet	IP 9971	9.4	Zambia	Manwaring 2018	genotype	Accession/ genotype
Iron	Pearl millet	IP 22420	5.247	India	Manwaring 2018	genotype	Accession/ genotype
Iron	Pearl millet	IP 8074	6.453	India	Manwaring 2018	genotype	Accession/ genotype
Iron	Pearl millet	Tift 383	5.334	USA	Manwaring 2018	genotype	Accession/ genotype
Iron	Pearl millet	IP 13817	5.974	Burkina Faso	Manwaring 2018	genotype	Accession/ genotype
Iron	Pearl millet	IP 13180	6.22	Nigeria	Manwaring 2018	genotype	Accession/ genotype
Iron	Pearl millet	IP 10701	6.963	Mali	Manwaring 2018	genotype	Accession/ genotype
Iron	Pearl millet	IP 21169	6.237	India	Manwaring 2018	genotype	Accession/ genotype
Iron	Pearl millet	IP 8129	4.319	India	Manwaring 2018	genotype	Accession/ genotype
Iron	Pearl millet	ICMP 451-P6	6.43	India	Manwaring 2018	genotype	Accession/ genotype
Iron	Pearl millet	IP 11593	5.448	Burkina Faso	Manwaring 2018	genotype	Accession/ genotype
Iron	Pearl millet	IP 10471	7.339	Zimbabwe	Manwaring 2018	genotype	Accession/ genotype
Iron	Pearl millet	IP 7952	3.858	India	Manwaring 2018	genotype	Accession/ genotype
Iron	Pearl millet	IP 9282	11.101	Togo	Manwaring 2018	genotype	Accession/ genotype
Iron	Pearl millet	IP 17611	5.148	Togo	Manwaring 2018	genotype	Accession/ genotype
Iron	Pearl millet	IP 7886	9.374	India	Manwaring 2018	genotype	Accession/ genotype
Iron	Pearl millet	ICMV-IS 89305	5.535	India	Manwaring 2018	genotype	Accession/ genotype
Iron	Pearl millet	Raj 171 (ICMV 85404=RBC-IC 9)	8.945	India	Manwaring 2018	genotype	Accession/ genotype
Iron	Pearl millet	IP 13384	7.048	Uganda	Manwaring 2018	genotype	Accession/ genotype
Iron	Pearl millet	IP 13344	3.363	Sudan	Manwaring 2018	genotype	Accession/ genotype
Iron	Pearl millet	IP 16638	8.329	Zimbabwe	Manwaring 2018	genotype	Accession/ genotype
Iron	Pearl millet	IP 8972	4.921	Togo	Manwaring 2018	genotype	Accession/ genotype
Iron	Pearl millet	IP 7967	5.076	India	Manwaring 2018	genotype	Accession/ genotype
Iron	Pearl millet	IP 5441	3.327	Niger	Manwaring 2018	genotype	Accession/ genotype
Iron	Pearl millet	IP 16289	4.403	Zimbabwe	Manwaring 2018	genotype	Accession/ genotype
Iron	Pearl millet	IP 6682	7.166	Malawi	Manwaring 2018	genotype	Accession/ genotype
Iron	Pearl millet	IP 3138	8.216	India	Manwaring 2018	genotype	Accession/ genotype
Iron	Pearl millet	IP 11584	4.355	Burkina Faso	Manwaring 2018	genotype	Accession/ genotype
Iron	Pearl millet	IP 8172	7.979	India	Manwaring 2018	genotype	Accession/ genotype
Iron	Pearl millet	IP 11218	6.425	Zimbabwe	Manwaring 2018	genotype	Accession/ genotype
Iron	Pearl millet	IP 18412	6.951	Namibia	Manwaring 2018	genotype	Accession/ genotype
Iron	Pearl millet	IP 8174	6.713	India	Manwaring 2018	genotype	Accession/ genotype
Iron	Pearl millet	IP 5438	8.416	Niger	Manwaring 2018	genotype	Accession/ genotype
Iron	Pearl millet	IP 11378	5.501	Burkina Faso	Manwaring 2018	genotype	Accession/ genotype
Iron	Pearl millet	IP 13608	6.501	India	Manwaring 2018	genotype	Accession/ genotype
Iron	Pearl millet	IP 8647	9.616	Sudan	Manwaring 2018	genotype	Accession/ genotype
Iron	Pearl millet	IP 7364	7.627	Tanzania	Manwaring 2018	genotype	Accession/ genotype
Iron	Pearl millet	IP 15536	3.965	Burkina Faso	Manwaring 2018	genotype	Accession/ genotype
Iron	Pearl millet	IP 6125	7.493	Cameroon	Manwaring 2018	genotype	Accession/ genotype
Iron	Pearl millet	IP 14624	5.875	Cameroon	Manwaring 2018	genotype	Accession/ genotype
Iron	Pearl millet	IP 12020	8.608	Nigeria	Manwaring 2018	genotype	Accession/ genotype
Iron	Pearl millet	IP 13290	7.595	Senegal	Manwaring 2018	genotype	Accession/ genotype
Iron	Pearl millet	IP 11763	6.456	South Africa	Manwaring 2018	genotype	Accession/ genotype
Iron	Pearl millet	IP 13520	5.573	India	Manwaring 2018	genotype	Accession/ genotype
Iron	Pearl millet	IP 12128	5.436	Nigeria	Manwaring 2018	genotype	Accession/ genotype
Iron	Pearl millet	IP 14311	9.781	Cameroon	Manwaring 2018	genotype	Accession/ genotype
Iron	Pearl millet	IP 15857	5.86	Tanzania	Manwaring 2018	genotype	Accession/ genotype
Iron	Pearl millet	IP 12364	5.501	Nigeria	Manwaring 2018	genotype	Accession/ genotype
Iron	Pearl millet	IP 18292	3.661	India	Manwaring 2018	genotype	Accession/ genotype
Iron	Pearl millet	IP 13840	5.371	Burkina Faso	Manwaring 2018	genotype	Accession/ genotype
Iron	Pearl millet	IP 11929	5.79	Sierra Leone	Manwaring 2018	genotype	Accession/ genotype
Iron	Pearl millet	IP 10945	4.91	Sudan	Manwaring 2018	genotype	Accession/ genotype
Iron	Pearl millet	IP 7941	4.494	India	Manwaring 2018	genotype	Accession/ genotype
Iron	Pearl millet	IP 17150	7.557	Zimbabwe	Manwaring 2018	genotype	Accession/ genotype
Iron	Pearl millet	IP 13459	4.153	India	Manwaring 2018	genotype	Accession/ genotype
Iron	Pearl millet	IP 8182	5.199	India	Manwaring 2018	genotype	Accession/ genotype
Iron	Pearl millet	IP 14849	7.216	Cameroon	Manwaring 2018	genotype	Accession/ genotype
Iron	Pearl millet	IP 5900	6.45	Senegal	Manwaring 2018	genotype	Accession/ genotype
Iron	Pearl millet	IP 19334	4.106	Namibia	Manwaring 2018	genotype	Accession/ genotype
Iron	Pearl millet	IP 3110	4.862	India	Manwaring 2018	genotype	Accession/ genotype
Iron	Pearl millet	IP 7536	9.34	India	Manwaring 2018	genotype	Accession/ genotype
Iron	Pearl millet	IP 12395	5.694	South Africa	Manwaring 2018	genotype	Accession/ genotype
Iron	Pearl millet	IP 14418	6.859	Cameroon	Manwaring 2018	genotype	Accession/ genotype
Iron	Pearl millet	IP 17493	4.401	Togo	Manwaring 2018	genotype	Accession/ genotype
Iron	Pearl millet	IP 6415	3.502	Mali	Manwaring 2018	genotype	Accession/ genotype
Iron	Pearl millet	IP 16120	4.34	India	Manwaring 2018	genotype	Accession/ genotype
Iron	Pearl millet	IP 5560	5.457	Niger	Manwaring 2018	genotype	Accession/ genotype
Iron	Pearl millet	IP 12138	4.174	Nigeria	Manwaring 2018	genotype	Accession/ genotype
Iron	Pearl millet	IP15512	5.066	Burkina Faso	Manwaring 2018	genotype	Accession/ genotype
Iron	Pearl millet	IP 10579	6	Mali	Manwaring 2018	genotype	Accession/ genotype
Iron	Pearl millet	IP 13324	4.311	Sudan	Manwaring 2018	genotype	Accession/ genotype
Iron	Pearl millet	IP 19405	10.228	Chad	Manwaring 2018	genotype	Accession/ genotype
Iron	Pearl millet	IP 17125	2.918	Zimbabwe	Manwaring 2018	genotype	Accession/ genotype
Iron	Pearl millet	IP 5031	4.911	Nigeria	Manwaring 2018	genotype	Accession/ genotype
Iron	Pearl millet	IP 11358	6.136	Burkina Faso	Manwaring 2018	genotype	Accession/ genotype
Iron	Pearl millet	IP 7660	5.36	India	Manwaring 2018	genotype	Accession/ genotype
Iron	Pearl millet	IP 15553	8.404	Burkina Faso	Manwaring 2018	genotype	Accession/ genotype
Iron	Pearl millet	IP 18168	3.7	Burkina Faso	Manwaring 2018	genotype	Accession/ genotype
Iron	Pearl millet	IP 13363	3.496	Tanzania	Manwaring 2018	genotype	Accession/ genotype
Iron	Pearl millet	IP 6310	5.061	Mali	Manwaring 2018	genotype	Accession/ genotype
Iron	Pearl millet	IP 20679	5.107	Nigeria	Manwaring 2018	genotype	Accession/ genotype
Iron	Pearl millet	IP 10339	4.513	Nigeria	Manwaring 2018	genotype	Accession/ genotype
Iron	Pearl millet	IP 3201	6.271	India	Manwaring 2018	genotype	Accession/ genotype
Iron	Pearl millet	P 310-17-B	6.291	India	Manwaring 2018	genotype	Accession/ genotype
Iron	Pearl millet	IP 14148	4.623	Zimbabwe	Manwaring 2018	genotype	Accession/ genotype
Iron	Pearl millet	IP 4952	10.382	Uganda	Manwaring 2018	genotype	Accession/ genotype
Iron	Pearl millet	ICMB-99222	7.65	India	Kumar et al. 2020	genotype	Accession/ genotype
Iron	Pearl millet	ICMB-05888	8.55	India	Kumar et al. 2020	genotype	Accession/ genotype
Iron	Pearl millet	ICMB-92777	1.7	India	Kumar et al. 2020	genotype	Accession/ genotype
Iron	Pearl millet	ICMB-06777	5.65	India	Kumar et al. 2020	genotype	Accession/ genotype
Iron	Pearl millet	ICMB-95222	4.2	India	Kumar et al. 2020	genotype	Accession/ genotype
Iron	Pearl millet	213SU-14B	5.6	India	Kumar et al. 2020	genotype	Accession/ genotype
Iron	Pearl millet	230SU-14B	10.3	India	Kumar et al. 2020	genotype	Accession/ genotype
Iron	Pearl millet	ICMB-05333	9.7	India	Kumar et al. 2020	genotype	Accession/ genotype
Iron	Pearl millet	ICMB-89111	7.7	India	Kumar et al. 2020	genotype	Accession/ genotype
Iron	Pearl millet	ICMB-96222	12.2	India	Kumar et al. 2020	genotype	Accession/ genotype
Iron	Pearl millet	225SU-14B	2.25	India	Kumar et al. 2020	genotype	Accession/ genotype
Iron	Pearl millet	ICMB-04999	10.7	India	Kumar et al. 2020	genotype	Accession/ genotype
Iron	Pearl millet	218SU-14B	9.2	India	Kumar et al. 2020	genotype	Accession/ genotype
Iron	Pearl millet	227SU-14B	3.95	India	Kumar et al. 2020	genotype	Accession/ genotype
Iron	Pearl millet	212SU-14B	8.9	India	Kumar et al. 2020	genotype	Accession/ genotype
Iron	Pearl millet	211SU-14B	1.95	India	Kumar et al. 2020	genotype	Accession/ genotype
Iron	Pearl millet	215SU-14B	9.55	India	Kumar et al. 2020	genotype	Accession/ genotype
Iron	Pearl millet	ICMB-05222	9.4	India	Kumar et al. 2020	genotype	Accession/ genotype
Iron	Pearl millet	224SU-14B	6.95	India	Kumar et al. 2020	genotype	Accession/ genotype
Iron	Pearl millet	ICMB-08444	5.7	India	Kumar et al. 2020	genotype	Accession/ genotype
Iron	Pearl millet	226SU-14B	4.7	India	Kumar et al. 2020	genotype	Accession/ genotype
Iron	Pearl millet	ICMB-98222	9.1	India	Kumar et al. 2020	genotype	Accession/ genotype
Iron	Pearl millet	ICMB-841	5.7	India	Kumar et al. 2020	genotype	Accession/ genotype
Iron	Pearl millet	261SU-14B	5.65	India	Kumar et al. 2020	genotype	Accession/ genotype
Iron	Pearl millet	121SM-13R	5.5	India	Kumar et al. 2020	genotype	Accession/ genotype
Iron	Pearl millet	J2510R	5.35	India	Kumar et al. 2020	genotype	Accession/ genotype
Iron	Pearl millet	J2500R	9.6	India	Kumar et al. 2020	genotype	Accession/ genotype
Iron	Pearl millet	J2480R	11	India	Kumar et al. 2020	genotype	Accession/ genotype
Iron	Pearl millet	123SB14	2.45	India	Kumar et al. 2020	genotype	Accession/ genotype
Iron	Pearl millet	106SB13	3.35	India	Kumar et al. 2020	genotype	Accession/ genotype
Iron	Pearl millet	131SM14	2.1	India	Kumar et al. 2020	genotype	Accession/ genotype
Iron	Pearl millet	J2523	5.1	India	Kumar et al. 2020	genotype	Accession/ genotype
Iron	Pearl millet	113SB13	5.45	India	Kumar et al. 2020	genotype	Accession/ genotype
Iron	Pearl millet	124SB14	5.45	India	Kumar et al. 2020	genotype	Accession/ genotype
Iron	Pearl millet	J2549	8.55	India	Kumar et al. 2020	genotype	Accession/ genotype
Iron	Pearl millet	237SM13	1.4	India	Kumar et al. 2020	genotype	Accession/ genotype
Iron	Pearl millet	94SB13	4.35	India	Kumar et al. 2020	genotype	Accession/ genotype
Iron	Pearl millet	128SM14	4.8	India	Kumar et al. 2020	genotype	Accession/ genotype
Iron	Pearl millet	199SM13	3.15	India	Kumar et al. 2020	genotype	Accession/ genotype
Iron	Pearl millet	109SB13	6.6	India	Kumar et al. 2020	genotype	Accession/ genotype
Iron	Pearl millet	123SM14	5.55	India	Kumar et al. 2020	genotype	Accession/ genotype
Iron	Pearl millet	99SM13	3.5	India	Kumar et al. 2020	genotype	Accession/ genotype
Iron	Pearl millet	93SM13	5.25	India	Kumar et al. 2020	genotype	Accession/ genotype
Iron	Pearl millet	95SM13	5.3	India	Kumar et al. 2020	genotype	Accession/ genotype
Iron	Pearl millet	110SB13	2.45	India	Kumar et al. 2020	genotype	Accession/ genotype
Iron	Pearl millet	108SB13	4.85	India	Kumar et al. 2020	genotype	Accession/ genotype
Iron	Pearl millet	73SB13	5.65	India	Kumar et al. 2020	genotype	Accession/ genotype
Iron	Pearl millet	J2512	6.4	India	Kumar et al. 2020	genotype	Accession/ genotype
Iron	Pearl millet	ICTP 8203	7.3	India	Govindaraj et al. 2020	cultivar	variety	hybrid
Iron	Pearl millet	Ajeet 38	6.1	India	Govindaraj et al. 2020	cultivar	variety	hybrid
Iron	Pearl millet	Sanjivani 222	6.1	India	Govindaraj et al. 2020	cultivar	variety	hybrid
Iron	Pearl millet	PAC 903	6	India	Govindaraj et al. 2020	cultivar	variety	hybrid
Iron	Pearl millet	86 M 86	5.9	India	Govindaraj et al. 2020	cultivar	variety	hybrid
Iron	Pearl millet	HTBH 4204	5.7	India	Govindaraj et al. 2020	cultivar	variety	hybrid
Iron	Pearl millet	XL 51	5.7	India	Govindaraj et al. 2020	cultivar	variety	hybrid
Iron	Pearl millet	Ajeet 39	5.7	India	Govindaraj et al. 2020	cultivar	variety	hybrid
Iron	Pearl millet	Shradha	5.6	India	Govindaraj et al. 2020	cultivar	variety	hybrid
Iron	Pearl millet	PAC 982	5.6	India	Govindaraj et al. 2020	cultivar	variety	hybrid
Iron	Pearl millet	RBH 9	5.5	India	Govindaraj et al. 2020	cultivar	variety	hybrid
Iron	Pearl millet	Sanjivani 2312	5.5	India	Govindaraj et al. 2020	cultivar	variety	hybrid
Iron	Pearl millet	ICMH 356	5.4	India	Govindaraj et al. 2020	cultivar	variety	hybrid
Iron	Pearl millet	NBH 1134	5.4	India	Govindaraj et al. 2020	cultivar	variety	hybrid
Iron	Pearl millet	KBH 7201	5.3	India	Govindaraj et al. 2020	cultivar	variety	hybrid
Iron	Pearl millet	HTBH 4203	5.3	India	Govindaraj et al. 2020	cultivar	variety	hybrid
Iron	Pearl millet	PAC 931	5.2	India	Govindaraj et al. 2020	cultivar	variety	hybrid
Iron	Pearl millet	Navbharat Banas Express	5.1	India	Govindaraj et al. 2020	cultivar	variety	hybrid
Iron	Pearl millet	Saburi	5.1	India	Govindaraj et al. 2020	cultivar	variety	hybrid
Iron	Pearl millet	N 68	5	India	Govindaraj et al. 2020	cultivar	variety	hybrid
Iron	Pearl millet	IP 3329	7.8	India	Govindaraj et al. 2020	cultivar	variety	hybrid
Iron	Pearl millet	IP 3749	7.8	India	Govindaraj et al. 2020	cultivar	variety	hybrid
Iron	Pearl millet	IP 4454	9.1	India	Govindaraj et al. 2020	cultivar	variety	hybrid
Iron	Pearl millet	IP 5316	8.2	Niger	Govindaraj et al. 2020	cultivar	variety	hybrid
Iron	Pearl millet	IP 7208	9.3	India	Govindaraj et al. 2020	cultivar	variety	hybrid
Iron	Pearl millet	IP 7536	8.2	India	Govindaraj et al. 2020	cultivar	variety	hybrid
Iron	Pearl millet	IP 9351	7.1	Ghana	Govindaraj et al. 2020	cultivar	variety	hybrid
Iron	Pearl millet	IP 9407	6.4	Ghana	Govindaraj et al. 2020	cultivar	variety	hybrid
Iron	Pearl millet	IP 9496	7.6	Ghana	Govindaraj et al. 2020	cultivar	variety	hybrid
Iron	Pearl millet	IP 9572	7.2	Ghana	Govindaraj et al. 2020	cultivar	variety	hybrid
Iron	Pearl millet	IP 11316	7	Burkina Faso	Govindaraj et al. 2020	cultivar	variety	hybrid
Iron	Pearl millet	IP 11784	5.2	India	Govindaraj et al. 2020	cultivar	variety	hybrid
Iron	Pearl millet	IP 12507	7.6	India	Govindaraj et al. 2020	cultivar	variety	hybrid
Iron	Pearl millet	IP 12939	7.4	Ghana	Govindaraj et al. 2020	cultivar	variety	hybrid
Iron	Pearl millet	IP 14148	6.9	Zimbabwe	Govindaraj et al. 2020	cultivar	variety	hybrid
Iron	Pearl millet	MBC 2	4.3	India	K N Rai et al. 2015	varieties	variety	released open pollinated varieties
Iron	Pearl millet	CZP 9802	4.2	India	K N Rai et al. 2015	varieties	variety	released open pollinated varieties
Iron	Pearl millet	HC 10	4.9	India	K N Rai et al. 2015	varieties	variety	released open pollinated varieties
Iron	Pearl millet	HC 20	5	India	K N Rai et al. 2015	varieties	variety	released open pollinated varieties
Iron	Pearl millet	Pusa Composite 334	4.9	India	K N Rai et al. 2015	varieties	variety	released open pollinated varieties
Iron	Pearl millet	Pusa Composite 383	4.6	India	K N Rai et al. 2015	varieties	variety	released open pollinated varieties
Iron	Pearl millet	Pusa Composite 443	4.6	India	K N Rai et al. 2015	varieties	variety	released open pollinated varieties
Iron	Pearl millet	Raj 171	4.9	India	K N Rai et al. 2015	varieties	variety	released open pollinated varieties
Iron	Pearl millet	WC - C75	4.7	India	K N Rai et al. 2015	varieties	variety	released open pollinated varieties
Iron	Pearl millet	ICMS 7703	5	India	K N Rai et al. 2015	varieties	variety	released open pollinated varieties
Iron	Pearl millet	ICTP 8203	6.7	India	K N Rai et al. 2015	varieties	variety	released open pollinated varieties
Iron	Pearl millet	ICMV 155	4.8	India	K N Rai et al. 2015	varieties	variety	released open pollinated varieties
Iron	Pearl millet	ICMV 221	6.1	India	K N Rai et al. 2015	varieties	variety	released open pollinated varieties
Iron	Pearl millet	JBV 2	4.7	India	K N Rai et al. 2015	varieties	variety	released open pollinated varieties
Iron	Pearl millet	JBV 3	4.4	India	K N Rai et al. 2015	varieties	variety	released open pollinated varieties
Iron	Pearl millet	PPC 6	5.3	India	K N Rai et al. 2015	varieties	variety	released open pollinated varieties
Iron	Pearl millet	AIMP 92901	5.6	India	K N Rai et al. 2015	varieties	variety	released open pollinated varieties
Iron	Pearl millet	Co (Cu) 9	5.2	India	K N Rai et al. 2015	varieties	variety	released open pollinated varieties
Iron	Pearl millet	PAC 903	5.5	India	K N Rai et al. 2015	varieties	variety	released open pollinated varieties
Iron	Pearl millet	PAC 931	5.4	India	K N Rai et al. 2015	varieties	variety	released open pollinated varieties
Iron	Pearl millet	PAC 982	4.9	India	K N Rai et al. 2015	varieties	variety	released open pollinated varieties
Iron	Pearl millet	Ajeet 38	5.5	India	K N Rai et al. 2015	varieties	variety	released open pollinated varieties
Iron	Pearl millet	XL 51	5.5	India	K N Rai et al. 2015	varieties	variety	released open pollinated varieties
Iron	Pearl millet	ICMH 356	4.6	India	K N Rai et al. 2015	varieties	variety	released open pollinated varieties
Iron	Pearl millet	JKBH 676	4.8	India	K N Rai et al. 2015	varieties	variety	released open pollinated varieties
Iron	Pearl millet	Krishna 7201	4.7	India	K N Rai et al. 2015	varieties	variety	released open pollinated varieties
Iron	Pearl millet	Saburi	5.2	India	K N Rai et al. 2015	varieties	variety	released open pollinated varieties
Iron	Pearl millet	Shradha	5.4	India	K N Rai et al. 2015	varieties	variety	released open pollinated varieties
Iron	Pearl millet	Navbharat Banas Express	5	India	K N Rai et al. 2015	varieties	variety	released open pollinated varieties
Iron	Pearl millet	NBH 1134	5.4	India	K N Rai et al. 2015	varieties	variety	released open pollinated varieties
Iron	Pearl millet	86M86	5.6	India	K N Rai et al. 2015	varieties	variety	released open pollinated varieties
Iron	Pearl millet	RBH 9	5.3	India	K N Rai et al. 2015	varieties	variety	released open pollinated varieties
Iron	Pearl millet	VBBH 3125	4.9	India	K N Rai et al. 2015	varieties	variety	released open pollinated varieties
Iron	Pearl millet	ICMB 89111	5.68	India	Govindaraj et al. 2013	Accession/ genotype	Accession/ genotype
Iron	Pearl millet	ICMB 93222	9.01	India	Govindaraj et al. 2013	Accession/ genotype	Accession/ genotype
Iron	Pearl millet	ICMB 93333	5.37	India	Govindaraj et al. 2013	Accession/ genotype	Accession/ genotype
Iron	Pearl millet	ICMB 94111	8.58	India	Govindaraj et al. 2013	Accession/ genotype	Accession/ genotype
Iron	Pearl millet	ICMB 97111	5.01	India	Govindaraj et al. 2013	Accession/ genotype	Accession/ genotype
Iron	Pearl millet	ICMB 98222	10.15	India	Govindaraj et al. 2013	Accession/ genotype	Accession/ genotype
Iron	Pearl millet	ICMB 00888	6.37	India	Govindaraj et al. 2013	Accession/ genotype	Accession/ genotype
Iron	Pearl millet	ICMB 04777	7.61	India	Govindaraj et al. 2013	Accession/ genotype	Accession/ genotype
Iron	Pearl millet	841 B	4.79	India	Govindaraj et al. 2013	Accession/ genotype	Accession/ genotype
Iron	Pearl millet	843 B	5.27	India	Govindaraj et al. 2013	Accession/ genotype	Accession/ genotype
Iron	Pearl millet	863 B	7.34	India	Govindaraj et al. 2013	Accession/ genotype	Accession/ genotype
Iron	Pearl millet	ICMB 88006	4.22	India	Govindaraj et al. 2013	Accession/ genotype	Accession/ genotype
Iron	Pearl millet	ICMB 91222	8.87	India	Govindaraj et al. 2013	Accession/ genotype	Accession/ genotype
Iron	Pearl millet	ICMB 92111	3.35	India	Govindaraj et al. 2013	Accession/ genotype	Accession/ genotype
Iron	Pearl millet	ICMB 95333	9.59	India	Govindaraj et al. 2013	Accession/ genotype	Accession/ genotype
Iron	Pearl millet	ICMB 96333	8.18	India	Govindaraj et al. 2013	Accession/ genotype	Accession/ genotype
Iron	Pearl millet	ICMB 99444	8.23	India	Govindaraj et al. 2013	Accession/ genotype	Accession/ genotype
Iron	Pearl millet	ICMB 00999	5.35	India	Govindaraj et al. 2013	Accession/ genotype	Accession/ genotype
Iron	Pearl millet	ICMB 02444	7.95	India	Govindaraj et al. 2013	Accession/ genotype	Accession/ genotype
Iron	Pearl millet	ICMB 03111	5.29	India	Govindaraj et al. 2013	Accession/ genotype	Accession/ genotype
Iron	Pearl millet	ICMB 04222	5.54	India	Govindaraj et al. 2013	Accession/ genotype	Accession/ genotype
Iron	Pearl millet	ICMB 04555	4.55	India	Govindaraj et al. 2013	Accession/ genotype	Accession/ genotype
Iron	Pearl millet	ICMB 04888	5.79	India	Govindaraj et al. 2013	Accession/ genotype	Accession/ genotype
Iron	Pearl millet	ICMB 04999	4.11	India	Govindaraj et al. 2013	Accession/ genotype	Accession/ genotype
Iron	Pearl millet	IPC 390	4.57	India	Govindaraj et al. 2013	tester hybrid	Accession/ genotype
Iron	Pearl millet	IPC 616	9.18	India	Govindaraj et al. 2013	tester hybrid	Accession/ genotype
Iron	Pearl millet	IPC 774	8.35	India	Govindaraj et al. 2013	tester hybrid	Accession/ genotype
Iron	Pearl millet	IPC 828	5.46	India	Govindaraj et al. 2013	tester hybrid	Accession/ genotype
Iron	Pearl millet	IPC 843	7.31	India	Govindaraj et al. 2013	tester hybrid	Accession/ genotype
Iron	Pearl millet	IPC 1178	8.06	India	Govindaraj et al. 2013	tester hybrid	Accession/ genotype
Iron	Pearl millet	IPC 1307	4.67	India	Govindaraj et al. 2013	tester hybrid	Accession/ genotype
Iron	Pearl millet	IPC 1354	4.05	India	Govindaraj et al. 2013	tester hybrid	Accession/ genotype
Iron	Pearl millet	IPC 1650	10.07	India	Govindaraj et al. 2013	tester hybrid	Accession/ genotype
Iron	Pearl millet	IPC 338	5.24	India	Govindaraj et al. 2013	tester hybrid	Accession/ genotype
Iron	Pearl millet	IPC 404	4.88	India	Govindaraj et al. 2013	tester hybrid	Accession/ genotype
Iron	Pearl millet	IPC 536	6.02	India	Govindaraj et al. 2013	tester hybrid	Accession/ genotype
Iron	Pearl millet	IPC 689	5.85	India	Govindaraj et al. 2013	tester hybrid	Accession/ genotype
Iron	Pearl millet	IPC 735	9.98	India	Govindaraj et al. 2013	tester hybrid	Accession/ genotype
Iron	Pearl millet	IPC 811	4.49	India	Govindaraj et al. 2013	tester hybrid	Accession/ genotype
Iron	Pearl millet	IPC 1254	4.58	India	Govindaraj et al. 2013	tester hybrid	Accession/ genotype
Iron	Pearl millet	IPC 1268	3.63	India	Govindaraj et al. 2013	tester hybrid	Accession/ genotype
Iron	Pearl millet	IPC 1642	5.02	India	Govindaraj et al. 2013	tester hybrid	Accession/ genotype
Iron	Pearl millet	ICMR 356	5.44	India	Govindaraj et al. 2013	tester hybrid	Accession/ genotype
Iron	Pearl millet	ICMR 06333	4.48	India	Govindaraj et al. 2013	tester hybrid	Accession/ genotype
Iron	Pearl millet	ICMR 06888	4.99	India	Govindaraj et al. 2013	tester hybrid	Accession/ genotype
Iron	Pearl millet	ICMS-7703	6.76	India	Singh et al. 1987	variety	variety	normal protein content
Iron	Pearl millet	WC-C75	4.5	India	Singh et al. 1987	synthetic variety	variety	normal protein content
Iron	Pearl millet	B-816	4.68	India	Singh et al. 1987	inbred Accession/ genotype	Accession/ genotype	high protein content
Iron	Pearl millet	WC-190	6.29	India	Singh et al. 1987	inbred Accession/ genotype	Accession/ genotype	high protein content
Iron	Pearl millet	700112	7.23	India	Singh et al. 1987	inbred Accession/ genotype	Accession/ genotype	high protein content
Iron	Pearl millet	PPMI 1220	6.27	India	Anuradha et al. 2017	genotype	Accession/ genotype
Iron	Pearl millet	PPMI 1224	6.47	India	Anuradha et al. 2017	genotype	Accession/ genotype
Iron	Pearl millet	PPMI 1225	8.5	India	Anuradha et al. 2017	genotype	Accession/ genotype
Iron	Pearl millet	PPMI 1233	5.54	India	Anuradha et al. 2017	genotype	Accession/ genotype
Iron	Pearl millet	PPMFeZMP 37	7.7	India	Anuradha et al. 2017	genotype	Accession/ genotype
Iron	Pearl millet	PPMFeZMP 47	6.12	India	Anuradha et al. 2017	genotype	Accession/ genotype
Iron	Pearl millet	PPMFeZMP 87	6.12	India	Anuradha et al. 2017	genotype	Accession/ genotype
Iron	Pearl millet	PPMI 1275	5.85	India	Anuradha et al. 2017	genotype	Accession/ genotype
Iron	Pearl millet	PPMI 1276	6.59	India	Anuradha et al. 2017	genotype	Accession/ genotype
Iron	Pearl millet	PPMDMgMP 99	9.38	India	Anuradha et al. 2017	genotype	Accession/ genotype
Iron	Pearl millet	PPMDMgMP 148	5.97	India	Anuradha et al. 2017	genotype	Accession/ genotype
Iron	Pearl millet	PPMI 1218	5.23	India	Anuradha et al. 2017	genotype	Accession/ genotype
Iron	Pearl millet	PPMI 1267	7.19	India	Anuradha et al. 2017	genotype	Accession/ genotype
Iron	Pearl millet	PPMI 1268	3.63	India	Anuradha et al. 2017	genotype	Accession/ genotype
Iron	Pearl millet	PPMFeZMP 126	7.78	India	Anuradha et al. 2017	genotype	Accession/ genotype
Iron	Pearl millet	PPMI 1285	7.44	India	Anuradha et al. 2017	genotype	Accession/ genotype
Iron	Pearl millet	PPMI 1287	5.12	India	Anuradha et al. 2017	genotype	Accession/ genotype
Iron	Pearl millet	5540 B	2.9	India	Anuradha et al. 2017	genotype	Accession/ genotype
Iron	Pearl millet	6030 B	5.06	India	Anuradha et al. 2017	genotype	Accession/ genotype
Iron	Pearl millet	PPMI 1084	8.76	India	Anuradha et al. 2017	genotype	Accession/ genotype
Iron	Pearl millet	PPMI 1089	5.72	India	Anuradha et al. 2017	genotype	Accession/ genotype
Iron	Pearl millet	PPMI 1092	4.95	India	Anuradha et al. 2017	genotype	Accession/ genotype
Iron	Pearl millet	H77/833-2	5.4	India	Anuradha et al. 2017	genotype	Accession/ genotype
Iron	Pearl millet	PPMI 1116	7.33	India	Anuradha et al. 2017	genotype	Accession/ genotype
Iron	Pearl millet	PPMI 1102	11.16	India	Anuradha et al. 2017	genotype	Accession/ genotype
Iron	Pearl millet	PPMI 1107	5.66	India	Anuradha et al. 2017	genotype	Accession/ genotype
Iron	Pearl millet	ICMB 04222	6.19	India	Anuradha et al. 2017	genotype	Accession/ genotype
Iron	Pearl millet	ICMR 06222	5.6	India	Anuradha et al. 2017	genotype	Accession/ genotype
Iron	Pearl millet	ICMR 07111	6.09	India	Anuradha et al. 2017	genotype	Accession/ genotype
Iron	Pearl millet	Dhanshakti	7.8	India	Anuradha et al. 2017	genotype	Accession/ genotype
Iron	Pearl millet	IPC 1657	4.27	India	Anuradha et al. 2017	genotype	Accession/ genotype
Iron	Pearl millet	J 108	4.25	India	Anuradha et al. 2017	genotype	Accession/ genotype
Iron	Pearl millet	PIB 228	8.04	India	Anuradha et al. 2017	genotype	Accession/ genotype
Iron	Pearl millet	PIB 686	4.22	India	Anuradha et al. 2017	genotype	Accession/ genotype
Iron	Pearl millet	PPMI 59	5.23	India	Anuradha et al. 2017	genotype	Accession/ genotype
Iron	Pearl millet	PPMI 214	7.76	India	Anuradha et al. 2017	genotype	Accession/ genotype
Iron	Pearl millet	PPMI 265	6.89	India	Anuradha et al. 2017	genotype	Accession/ genotype
Iron	Pearl millet	PPMI 275	5.12	India	Anuradha et al. 2017	genotype	Accession/ genotype
Iron	Pearl millet	PPMI 683	9.24	India	Anuradha et al. 2017	genotype	Accession/ genotype
Iron	Pearl millet	PPMI 708	11.46	India	Anuradha et al. 2017	genotype	Accession/ genotype
Iron	Pearl millet	PPMWGI 152	5.91	India	Anuradha et al. 2017	genotype	Accession/ genotype
Iron	Pearl millet	ICMV221	8.39	India	Krishnan and Meera, 2017	cultivar/ variety	variety
Iron	Pearl millet	ICMV221J	8.79	India	Krishnan and Meera, 2017	cultivar/ variety	variety
Iron	Pearl millet	ICTP8203	9.01	India	Krishnan and Meera, 2017	cultivar/ variety	variety
Iron	Pearl millet	ICTP8203J	9.1	India	Krishnan and Meera, 2017	cultivar/ variety	variety
Iron	Pearl millet	JBV2	7.02	India	Krishnan and Meera, 2017	cultivar/ variety	variety
Iron	Pearl millet	Mysore local	5.92	India	Krishnan and Meera, 2017	cultivar/ variety	variety
Iron	Pearl millet	Anantapur local	5.59	India	Krishnan and Meera, 2017	cultivar/ variety	variety
Iron	Pearl millet	GHB558	6.06	India	Krishnan and Meera, 2017	cultivar/ variety	variety
Iron	Pearl millet	GHB744	6.83	India	Krishnan and Meera, 2017	cultivar/ variety	variety
Iron	Pearl millet	RHB173	6.87	India	Krishnan and Meera, 2017	cultivar/ variety	variety
Iron	Pearl millet	HHB67 improved	9.34	India	Krishnan and Meera, 2017	cultivar/ variety	variety
Iron	Pearl millet	HHB223	5.78	India	Krishnan and Meera, 2017	cultivar/ variety	variety
Iron	Pearl millet	HHB226	13.41	India	Krishnan and Meera, 2017	cultivar/ variety	variety
Iron	Pearl millet	HHB-67 Imp	6	India	Berwal et al., 2017	hybrid variety	variety	hybrid adopted by farmers
Iron	Pearl millet	HHB-94	4	India	Berwal et al., 2017	hybrid variety	variety	hybrid adopted by farmers
Iron	Pearl millet	HHB-146	4.6	India	Berwal et al., 2017	hybrid variety	variety	hybrid adopted by farmers
Iron	Pearl millet	HHB-197	4.4	India	Berwal et al., 2017	hybrid variety	variety	hybrid adopted by farmers
Iron	Pearl millet	HHB-223	4.9	India	Berwal et al., 2017	hybrid variety	variety	hybrid adopted by farmers
Iron	Pearl millet	HHB-226	4.7	India	Berwal et al., 2017	hybrid variety	variety	hybrid adopted by farmers
Iron	Pearl millet	HHB-234	4.7	India	Berwal et al., 2017	hybrid variety	variety	hybrid adopted by farmers
Iron	Pearl millet	WHC-901-445	6.7	India	Berwal et al., 2017	hybrid variety	variety	hybrid adopted by farmers
Iron	Pearl millet	HMP-802	3.2	India	Berwal et al., 2017	hybrid variety	variety	hybrid adopted by farmers
Iron	Pearl millet	HC-10	7.1	India	Berwal et al., 2017	hybrid variety	variety	hybrid adopted by farmers
Iron	Pearl millet	HC-20	5.8	India	Berwal et al., 2017	hybrid variety	variety	hybrid adopted by farmers
Iron	Pearl millet	PPMI 683 (P1)	9.9	India	Singhal et al., 2018	genotype	Accession/ genotype
Iron	Pearl millet	PPMI 903	9.13	India	Singhal et al., 2018	genotype	Accession/ genotype
Iron	Pearl millet	PPMI 904	10.75	India	Singhal et al., 2018	genotype	Accession/ genotype
Iron	Pearl millet	RIL 130	9.34	India	Singhal et al., 2018	genotype	Accession/ genotype
Iron	Pearl millet	RIL 132	9.57	India	Singhal et al., 2018	genotype	Accession/ genotype
Iron	Pearl millet	RIL 149	10.05	India	Singhal et al., 2018	genotype	Accession/ genotype
Iron	Pearl millet	RIL 155	8.95	India	Singhal et al., 2018	genotype	Accession/ genotype
Iron	Pearl millet	RIL 156	8.87	India	Singhal et al., 2018	genotype	Accession/ genotype
Iron	Pearl millet	RIL 182	9.59	India	Singhal et al., 2018	genotype	Accession/ genotype
Iron	Pearl millet	RIL 183	8.92	India	Singhal et al., 2018	genotype	Accession/ genotype
Iron	Pearl millet	RIL 186/PPMI 951	9.98	India	Singhal et al., 2018	genotype	Accession/ genotype
Iron	Pearl millet	RIL 191	9.57	India	Singhal et al., 2018	genotype	Accession/ genotype
Iron	Pearl millet	RIL 197	8.67	India	Singhal et al., 2018	genotype	Accession/ genotype
Iron	Pearl millet	RIL 203	9.3	India	Singhal et al., 2018	genotype	Accession/ genotype
Iron	Pearl millet	RIL 207	10.1	India	Singhal et al., 2018	genotype	Accession/ genotype
Iron	Pearl millet	RIL 211	9.26	India	Singhal et al., 2018	genotype	Accession/ genotype
Iron	Pearl millet	RIL 214	8.92	India	Singhal et al., 2018	genotype	Accession/ genotype
Iron	Pearl millet	RIL 26	8.75	India	Singhal et al., 2018	genotype	Accession/ genotype
Iron	Pearl millet	RIL 28	10.82	India	Singhal et al., 2018	genotype	Accession/ genotype
Iron	Pearl millet	RIL 35	10.15	India	Singhal et al., 2018	genotype	Accession/ genotype
Iron	Pearl millet	RIL 38	10.42	India	Singhal et al., 2018	genotype	Accession/ genotype
Iron	Pearl millet	RIL 39	8.89	India	Singhal et al., 2018	genotype	Accession/ genotype
Iron	Pearl millet	RIL 45	9.46	India	Singhal et al., 2018	genotype	Accession/ genotype
Iron	Pearl millet	RIL 50	8.82	India	Singhal et al., 2018	genotype	Accession/ genotype
Iron	Pearl millet	RIL 51/PPMI 952	9.79	India	Singhal et al., 2018	genotype	Accession/ genotype
Iron	Pearl millet	RIL 69/PPMI 953	10.32	India	Singhal et al., 2018	genotype	Accession/ genotype
Iron	Pearl millet	RIL 70	9.5	India	Singhal et al., 2018	genotype	Accession/ genotype
Iron	Pearl millet	RIL 81	9.95	India	Singhal et al., 2018	genotype	Accession/ genotype
Iron	Pearl millet	RIL 85	8.64	India	Singhal et al., 2018	genotype	Accession/ genotype
Iron	Pearl millet	RIL 89	8.52	India	Singhal et al., 2018	genotype	Accession/ genotype
Iron	Pearl millet	ICMA/B 1501	7.6	India	Serba et al., 2020	Accession/ genotype	Accession/ genotype
Iron	Pearl millet	ICMA/B 1502	9.2	India	Serba et al., 2020	Accession/ genotype	Accession/ genotype
Iron	Pearl millet	ICMA/B 1503	6.9	India	Serba et al., 2020	Accession/ genotype	Accession/ genotype
Iron	Pearl millet	ICMA/B 1504	9.7	India	Serba et al., 2020	Accession/ genotype	Accession/ genotype
Iron	Pearl millet	ICMA/B 1505	11	India	Serba et al., 2020	Accession/ genotype	Accession/ genotype
Iron	Pearl millet	ICMA/B 1506	9.6	India	Serba et al., 2020	Accession/ genotype	Accession/ genotype
Iron	Pearl millet	ICMA/B 1507	9.2	India	Serba et al., 2020	Accession/ genotype	Accession/ genotype
Iron	Pearl millet	ICMA/B 1508	7.3	India	Serba et al., 2020	Accession/ genotype	Accession/ genotype
Iron	Pearl millet	ICMR 1201	7.9	India	Serba et al., 2020	Accession/ genotype	Accession/ genotype
Iron	Pearl millet	ICMR 1202	8.9	India	Serba et al., 2020	Accession/ genotype	Accession/ genotype
Iron	Pearl millet	ICMR 1203	10.1	India	Serba et al., 2020	Accession/ genotype	Accession/ genotype
Iron	Pearl millet	ICMR 1301	9.1	India	Serba et al., 2020	Accession/ genotype	Accession/ genotype
Iron	Pearl millet	ICMR 1501	8.6	India	Serba et al., 2020	Accession/ genotype	Accession/ genotype
Iron	Pearl millet	ICMR 1502	11	India	Serba et al., 2020	Accession/ genotype	Accession/ genotype
Iron	Pearl millet	ICMR 1503	9.9	India	Serba et al., 2020	Accession/ genotype	Accession/ genotype
Iron	Pearl millet	ICMR 1504	9.6	India	Serba et al., 2020	Accession/ genotype	Accession/ genotype
Iron	Pearl millet	ICMR 1505	7.4	India	Serba et al., 2020	Accession/ genotype	Accession/ genotype
Iron	Pearl millet	Dembi Sea	11.09	Sudan	Elsadig et al. 2016	genotype	Accession/ genotype
Iron	Pearl millet	Ugandi	8.62	Sudan	Elsadig et al. 2016	genotype	Accession/ genotype
Iron	Pearl millet	Dembi Millet	9.15	Sudan	Elsadig et al. 2016	genotype	Accession/ genotype
Iron	Pearl millet	Dembi Kabkabia	10.24	Sudan	Elsadig et al. 2016	genotype	Accession/ genotype
Iron	Pearl millet	Ashana	9.05	Sudan	Elsadig et al. 2016	genotype	Accession/ genotype
Iron	Pearl millet	MCNELC	9.1	Sudan	Elsadig et al. 2016	genotype	Accession/ genotype
Iron	Pearl millet	SADC (Togo)	8.32	Sudan	Elsadig et al. 2016	genotype	Accession/ genotype
Iron	Pearl millet	.SADC (Long)	9.79	Sudan	Elsadig et al. 2016	genotype	Accession/ genotype
Iron	Pearl millet	Sudan II	9.09	Sudan	Elsadig et al. 2016	genotype	Accession/ genotype
Iron	Pearl millet	HSD55555	6.88	Sudan	Elsadig et al. 2016	genotype	Accession/ genotype
Iron	Pearl millet	Dembi Shangal Toby	10.08	Sudan	Elsadig et al. 2016	genotype	Accession/ genotype
Iron	Pearl millet	HSD10362	8.47	Sudan	Elsadig et al. 2016	genotype	Accession/ genotype
Iron	Pearl millet	HSD10318	6.56	Sudan	Elsadig et al. 2016	genotype	Accession/ genotype
Iron	Pearl millet	HSD10309	9.08	Sudan	Elsadig et al. 2016	genotype	Accession/ genotype
Iron	Pearl millet	HSD10331	6.08	Sudan	Elsadig et al. 2016	genotype	Accession/ genotype
Iron	Pearl millet	HSD10319	8.12	Sudan	Elsadig et al. 2016	genotype	Accession/ genotype
Iron	Pearl millet	HSD10354	6.65	Sudan	Elsadig et al. 2016	genotype	Accession/ genotype
Iron	Pearl millet	HSD10392	7.31	Sudan	Elsadig et al. 2016	genotype	Accession/ genotype
Iron	Pearl millet	HSD10293	8.01	Sudan	Elsadig et al. 2016	genotype	Accession/ genotype
Iron	Pearl millet	HSD10376	8.11	Sudan	Elsadig et al. 2016	genotype	Accession/ genotype
Iron	Pearl millet	HSD7133	8.05	Sudan	Elsadig et al. 2016	genotype	Accession/ genotype
Iron	Pearl millet	.HSD7135	8.06	Sudan	Elsadig et al. 2016	genotype	Accession/ genotype
Iron	Pearl millet	HSD7134	10	Sudan	Elsadig et al. 2016	genotype	Accession/ genotype
Iron	Pearl millet	HSD10303	9.05	Sudan	Elsadig et al. 2016	genotype	Accession/ genotype
Iron	Pearl millet	HSD10291	6.05	Sudan	Elsadig et al. 2016	genotype	Accession/ genotype
Iron	Pearl millet	HSD10313	7.01	Sudan	Elsadig et al. 2016	genotype	Accession/ genotype
Iron	Pearl millet	HSD10294	7.14	Sudan	Elsadig et al. 2016	genotype	Accession/ genotype
Iron	Pearl millet	HSD7132	6.99	Sudan	Elsadig et al. 2016	genotype	Accession/ genotype
Iron	Pearl millet	HSD7131	7.03	Sudan	Elsadig et al. 2016	genotype	Accession/ genotype
Iron	Pearl millet	HSD10292	7.51	Sudan	Elsadig et al. 2016	genotype	Accession/ genotype
Iron	Pearl millet	GGP(C0)	7.85	India	Velu et al., 2008	variety	variety	composite/ open pollinated
Iron	Pearl millet	CGP	7.38	India	Velu et al., 2008	variety	variety	composite/ open pollinated
Iron	Pearl millet	IAC-ISCTCP-4	7.29	India	Velu et al., 2008	variety	variety	composite/ open pollinated
Iron	Pearl millet	PVGGT 4	7.16	India	Velu et al., 2008	variety	variety	composite/ open pollinated
Iron	Pearl millet	PVGGT 5	7.14	India	Velu et al., 2008	variety	variety	composite/ open pollinated
Iron	Pearl millet	Ugandi	7.01	India	Velu et al., 2008	variety	variety	composite/ open pollinated
Iron	Pearl millet	Hi Group	6.69	India	Velu et al., 2008	variety	variety	composite/ open pollinated
Iron	Pearl millet	Lubasi	6.66	India	Velu et al., 2008	variety	variety	composite/ open pollinated
Iron	Pearl millet	GGT(C0)	6.53	India	Velu et al., 2008	variety	variety	composite/ open pollinated
Iron	Pearl millet	LaGrap	6.52	India	Velu et al., 2008	variety	variety	composite/ open pollinated
Iron	Pearl millet	PVGGP 1	6.41	India	Velu et al., 2008	variety	variety	composite/ open pollinated
Iron	Pearl millet	PVGGP 6	6.32	India	Velu et al., 2008	variety	variety	composite/ open pollinated
Iron	Pearl millet	SSC C1 Brist	6.28	India	Velu et al., 2008	variety	variety	composite/ open pollinated
Iron	Pearl millet	Raw	11.93	India	Darshath et al. 2016	variety	variety
Iron	Pearl millet	ikmv 8201	7.8	Burkina Faso (West African FCT)	Stadlmayr et al., 2012	variety	variety
Iron	Pearl millet	ikmp 1	7.6	Burkina Faso (West African FCT)	Stadlmayr et al., 2012	variety	variety
Iron	Pearl millet	ikmp 2	7.7	Burkina Faso (West African FCT)	Stadlmayr et al., 2012	variety	variety
Iron	Pearl millet	ikmp 3	7.9	Burkina Faso (West African FCT)	Stadlmayr et al., 2012	variety	variety
Iron	Pearl millet	ikmp 4	7.7	Burkina Faso (West African FCT)	Stadlmayr et al., 2012	variety	variety
Iron	Pearl millet	ikmp 5	7.9	Burkina Faso (West African FCT)	Stadlmayr et al., 2012	variety	variety
Iron	Pearl millet	ikmp 6	7.7	Burkina Faso (West African FCT)	Stadlmayr et al., 2012	variety	variety
Iron	Pearl millet	ikmp 7	7.9	Burkina Faso (West African FCT)	Stadlmayr et al., 2012	variety	variety
Iron	Pearl millet	ikmp 8	7.9	Burkina Faso (West African FCT)	Stadlmayr et al., 2012	variety	variety
Iron	Pearl millet	ikmp 9	7.9	Burkina Faso (West African FCT)	Stadlmayr et al., 2012	variety	variety
Iron	Pearl millet	ikmp 10	7.6	Burkina Faso (West African FCT)	Stadlmayr et al., 2012	variety	variety
Iron	Pearl millet	ikmp 11	7.7	Burkina Faso (West African FCT)	Stadlmayr et al., 2012	variety	variety
Iron	Pearl millet	ikmp 12	7.9	Burkina Faso (West African FCT)	Stadlmayr et al., 2012	variety	variety
Iron	Pearl millet	ikmp 13	7.9	Burkina Faso (West African FCT)	Stadlmayr et al., 2012	variety	variety
Iron	Pearl millet	Dhanashakti	8.1	India	Rai et al., 2014	variety	variety
Iron	Pearl millet	ICTP8203	7.4	India	Rai et al., 2014	variety	variety
Iron	Pearl millet	POOLED	6.4	India, FCT	Longvah et al. 2017	pooled variety	variety
Iron	Pearl millet	POOLED	8	Tanzania, FCT	Lukmanji et al. 2008	pooled variety	variety
Iron	Pearl millet	POOLED	6.3	Kenya, FCT	Mwai 2018	pooled variety	variety
Iron	Pearl millet	POOLED	6.5	Pakistan, FCT	2001	pooled variety	variety
Iron	Pearl millet	POOLED	8	Nepal, FCT	Govt of Nepal, 2017	pooled variety	variety
Iron	Pearl millet	ICRI-Tabi	3.92	Nigeria	Bachir et al. 2016	varieties	variety
Iron	Pearl millet	ICMV-IS 13131(reselected ICRI-Tabi)	3.72	Nigeria	Bachir et al. 2016	varieties	variety
Iron	Pearl millet	Tera PPBV C0	3.09	Nigeria	Bachir et al. 2016	varieties	variety
Iron	Pearl millet	Tera PPBV C1	3.04	Nigeria	Bachir et al. 2016	varieties	variety
Iron	Pearl millet	Falwel PPBV C0	3.12	Nigeria	Bachir et al. 2016	varieties	variety
Iron	Pearl millet	Falwel PPBV C1	3.1	Nigeria	Bachir et al. 2016	varieties	variety
Iron	Pearl millet	Serkin Haoussa PPBV C0	3.1	Nigeria	Bachir et al. 2016	varieties	variety
Iron	Pearl millet	Serkin Haoussa PPBV C1	3.06	Nigeria	Bachir et al. 2016	varieties	variety
Iron	Pearl millet	Local check 1	3.15	Nigeria	Bachir et al. 2016	varieties	variety
Iron	Pearl millet	Local check 2	3.12	Nigeria	Bachir et al. 2016	varieties	variety
Iron	Pearl millet	SOSAT-C88	3.38	Nigeria	Bachir et al. 2016	varieties	variety
Iron	Pearl millet	ICMV-IS 89305	3.05	Nigeria	Bachir et al. 2016	varieties	variety
Iron	Pearl millet	Ka	7.9	Namibia	Shindume et al. 2019	genotype/ line	Accession/ genotype
Iron	Pearl millet	L5AP18	10.4	Namibia	Shindume et al. 2019	genotype/ line	Accession/ genotype
Iron	Pearl millet	L7AP1A	6.6	Namibia	Shindume et al. 2019	genotype/ line	Accession/ genotype
Iron	Pearl millet	R6P1-1	7.1	Namibia	Shindume et al. 2019	genotype/ line	Accession/ genotype
Iron	Pearl millet	RP95	5.9	Namibia	Shindume et al. 2019	genotype/ line	Accession/ genotype
Iron	Pearl millet	L8P5Rep2	6.7	Namibia	Shindume et al. 2019	genotype/ line	Accession/ genotype
Iron	Pearl millet	L8P5Rep1	6	Namibia	Shindume et al. 2019	genotype/ line	Accession/ genotype
Iron	Pearl millet	Oka2	7	Namibia	Shindume et al. 2019	genotype/ line	Accession/ genotype
Iron	Pearl millet	L3P5	4.6	Namibia	Shindume et al. 2019	genotype/ line	Accession/ genotype
Iron	Pearl millet	L4P1	5.1	Namibia	Shindume et al. 2019	genotype/ line	Accession/ genotype
Iron	Pearl millet	L8P12	4.5	Namibia	Shindume et al. 2019	genotype/ line	Accession/ genotype
Iron	Pearl millet	L10P18	6	Namibia	Shindume et al. 2019	genotype/ line	Accession/ genotype
Iron	Pearl millet	L5P11Rep2	4.4	Namibia	Shindume et al. 2019	genotype/ line	Accession/ genotype
Iron	Pearl millet	L10P13Rep1	5	Namibia	Shindume et al. 2019	genotype/ line	Accession/ genotype
Iron	Pearl millet	CGPMH-1	9.23	Canada	Mustafa et al. 2008	hybrid genotype	Accession/ genotype
Iron	Pearl millet	CGPMH-7	6.71	Canada	Mustafa et al. 2008	hybrid genotype	Accession/ genotype
Iron	Pearl millet	CGPMH-11	7.02	Canada	Mustafa et al. 2008	hybrid genotype	Accession/ genotype
Iron	Pearl millet	CGPMH-20	12.38	Canada	Mustafa et al. 2008	hybrid genotype	Accession/ genotype
Iron	Pearl millet	CGPMH-38	7.02	Canada	Mustafa et al. 2008	hybrid genotype	Accession/ genotype
Iron	Pearl millet	Shanti	6.4	India	Kulthe et al. 2016	cultivar/ variety	variety
Iron	Pearl millet	Pioneer 86M64	5.08	India	Kulthe et al. 2016	cultivar/ variety	variety
Iron	Pearl millet	Dhanshakti	8.12	India	Kulthe et al. 2016	cultivar/ variety	variety
Iron	Pearl millet	Dhansakthi	8.48	India	Anitha et al. 2019	variety	variety
Iron	Pearl millet	Proagro9444	4.73	India	Anitha et al. 2019	variety	variety
Iron	Pearl millet	Dhanshakti	8.1	India	Rai et al., 2014	variety	variety
Iron	Pearl millet	ICTP8203	7.4	India	Rai et al., 2014	variety	variety
Iron	Pearl millet(H)	ICMB 98222	8.5	India	Singhal et al., 2018	genotype	Accession/ genotype
Iron	Proso millet	IPm 9	4.72	India	Vetriventhan & Upadhyaya, 2018	germplasm accession	Accession/ genotype
Iron	Proso millet	IPm 2784	6.14	Sri Lanka	Vetriventhan & Upadhyaya, 2018	germplasm accession	Accession/ genotype
Iron	Proso millet	IPm 2621	4.68	India	Vetriventhan & Upadhyaya, 2018	germplasm accession	Accession/ genotype
Iron	Proso millet	IPm 2802	4.7	India	Vetriventhan & Upadhyaya, 2018	germplasm accession	Accession/ genotype
Iron	Proso millet	IPm 390	4.85	India	Vetriventhan & Upadhyaya, 2018	germplasm accession	Accession/ genotype
Iron	Proso millet	IPm 361	5.14	India	Vetriventhan & Upadhyaya, 2018	germplasm accession	Accession/ genotype
Iron	Proso millet	IPm 2824	5.25	India	Vetriventhan & Upadhyaya, 2018	germplasm accession	Accession/ genotype
Iron	Proso millet	IPm 2783	5.07	Sri Lanka	Vetriventhan & Upadhyaya, 2018	germplasm accession	Accession/ genotype
Iron	Proso millet	IPm 366	5.03	India	Vetriventhan & Upadhyaya, 2018	germplasm accession	Accession/ genotype
Iron	Proso millet	IPm 2620	4.84	India	Vetriventhan & Upadhyaya, 2018	germplasm accession	Accession/ genotype
Iron	Proso millet	IPm 2660	5.41	Nepal	Vetriventhan & Upadhyaya, 2018	germplasm accession	Accession/ genotype
Iron	Proso millet	IPm 2685	4.82	Pakistan	Vetriventhan & Upadhyaya, 2018	germplasm accession	Accession/ genotype
Iron	Proso millet	IPm 2158	5.11	Unknown	Vetriventhan & Upadhyaya, 2018	germplasm accession	Accession/ genotype
Iron	Proso millet	IPm 388	5.07	India	Vetriventhan & Upadhyaya, 2018	germplasm accession	Accession/ genotype
Iron	Proso millet	IPm 2700	4.49	India	Vetriventhan & Upadhyaya, 2018	germplasm accession	Accession/ genotype
Iron	Proso millet	IPm 384	4.8	India	Vetriventhan & Upadhyaya, 2018	germplasm accession	Accession/ genotype
Iron	Proso millet	IPm 1545	4.77	Unknown	Vetriventhan & Upadhyaya, 2018	germplasm accession	Accession/ genotype
Iron	Proso millet	IPm 2661	5.26	Nepal	Vetriventhan & Upadhyaya, 2018	germplasm accession	Accession/ genotype
Iron	Proso millet	IPm 362	4.52	India	Vetriventhan & Upadhyaya, 2018	germplasm accession	Accession/ genotype
Iron	Proso millet	IPm 2826	4.65	Romania	Vetriventhan & Upadhyaya, 2018	germplasm accession	Accession/ genotype
Iron	Proso millet	IPm 381	4.73	India	Vetriventhan & Upadhyaya, 2018	germplasm accession	Accession/ genotype
Iron	Proso millet	IPm 2575	5.32	Russia	Vetriventhan & Upadhyaya, 2018	germplasm accession	Accession/ genotype
Iron	Proso millet	IPm 2273	5.05	Unknown	Vetriventhan & Upadhyaya, 2018	germplasm accession	Accession/ genotype
Iron	Proso millet	IPm 2769	5.59	Ukraine	Vetriventhan & Upadhyaya, 2018	germplasm accession	Accession/ genotype
Iron	Proso millet	IPm 2780	5.6	Turkey	Vetriventhan & Upadhyaya, 2018	germplasm accession	Accession/ genotype
Iron	Proso millet	IPm 2037	6.26	Unknown	Vetriventhan & Upadhyaya, 2018	germplasm accession	Accession/ genotype
Iron	Proso millet	POOLED	3.8	China, FCT	Ershow 1990	pooled variety	variety
Iron	Proso millet	POOLED	3	Nepal, FCT	Govt of Nepal, 2017	pooled variety	variety
Iron	Proso millet	IPm 2069	7.32	Unknown	Vetriventhan & Upadhyaya, 2018	germplasm accession	Accession/ genotype
Iron	Proso millet	IPm 2076	6.88	Unknown	Vetriventhan & Upadhyaya, 2018	germplasm accession	Accession/ genotype
Iron	Proso millet	IPm 2537	6.33	Russia	Vetriventhan & Upadhyaya, 2018	germplasm accession	Accession/ genotype
Iron	Proso millet	IPm 2005	5.8	Unknown	Vetriventhan & Upadhyaya, 2018	germplasm accession	Accession/ genotype
Iron	Proso millet	IPm 2037	6.26	Unknown	Vetriventhan & Upadhyaya, 2018	germplasm accession	Accession/ genotype
Iron	Proso millet	IPm 2053	6.46	Unknown	Vetriventhan & Upadhyaya, 2018	germplasm accession	Accession/ genotype
Iron	Proso millet	IPm 2077	6.62	Unknown	Vetriventhan & Upadhyaya, 2018	germplasm accession	Accession/ genotype
Iron	Proso millet	IPm 2278	6.41	Unknown	Vetriventhan & Upadhyaya, 2018	germplasm accession	Accession/ genotype
Iron	Proso millet	IPm 2528	5.98	Russia	Vetriventhan & Upadhyaya, 2018	germplasm accession	Accession/ genotype
Iron	Proso millet	IPm 2689	6.08	Afghanistan	Vetriventhan & Upadhyaya, 2018	germplasm accession	Accession/ genotype
Iron	Proso millet	IPm 2769	5.59	Ukraine	Vetriventhan & Upadhyaya, 2018	germplasm accession	Accession/ genotype
Iron	Proso millet	IPm 2903	6.14	Syria	Vetriventhan & Upadhyaya, 2018	germplasm accession	Accession/ genotype
Iron	Proso millet	IPm 2004	5.9	Unknown	Vetriventhan & Upadhyaya, 2018	germplasm accession	Accession/ genotype
Iron	Proso millet	IPm 2062	5.41	Unknown	Vetriventhan & Upadhyaya, 2018	germplasm accession	Accession/ genotype
Iron	Proso millet	IPm 2083	5.86	Unknown	Vetriventhan & Upadhyaya, 2018	germplasm accession	Accession/ genotype
Iron	Proso millet	IPm 2123	6.61	Unknown	Vetriventhan & Upadhyaya, 2018	germplasm accession	Accession/ genotype
Iron	Proso millet	IPm 2507	5.55	Russia	Vetriventhan & Upadhyaya, 2018	germplasm accession	Accession/ genotype
Iron	Proso millet	IPm 2540	6.4	Russia	Vetriventhan & Upadhyaya, 2018	germplasm accession	Accession/ genotype
Iron	Proso millet	IPm 2552	6	Russia	Vetriventhan & Upadhyaya, 2018	germplasm accession	Accession/ genotype
Iron	Proso millet	IPm 2333	5.17	Russia	Vetriventhan & Upadhyaya, 2018	germplasm accession	Accession/ genotype
Iron	Proso millet	IPm 2594	5.35	Russia	Vetriventhan & Upadhyaya, 2018	germplasm accession	Accession/ genotype
Iron	Proso millet	IPm 2601	6.56	Russia	Vetriventhan & Upadhyaya, 2018	germplasm accession	Accession/ genotype
Iron	Proso millet	IPm 2697	5.76	Turkey	Vetriventhan & Upadhyaya, 2018	germplasm accession	Accession/ genotype
Iron	Proso millet	IPm 2721	6.4	Hungary	Vetriventhan & Upadhyaya, 2018	germplasm accession	Accession/ genotype
Iron	Proso millet	IPm 2735	5.84	UK	Vetriventhan & Upadhyaya, 2018	germplasm accession	Accession/ genotype
Iron	Proso millet	IPm 2745	5.47	Kyrgyzstan	Vetriventhan & Upadhyaya, 2018	germplasm accession	Accession/ genotype
Iron	Proso millet	IPm 2782	6.29	China	Vetriventhan & Upadhyaya, 2018	germplasm accession	Accession/ genotype
Iron	Proso millet	IPm 2875	4.88	Republic of Korea	Vetriventhan & Upadhyaya, 2018	germplasm accession	Accession/ genotype
Iron	Sorghum	B2211	3.6	Botswana	Motlhaudi et al. 2018	accession	Accession/ genotype
Iron	Sorghum	B2219	3.2	Botswana	Motlhaudi et al. 2018	accession	Accession/ genotype
Iron	Sorghum	B2225	3	Botswana	Motlhaudi et al. 2018	accession	Accession/ genotype
Iron	Sorghum	B2250	3	Botswana	Motlhaudi et al. 2018	accession	Accession/ genotype
Iron	Sorghum	B2273	3.3	Botswana	Motlhaudi et al. 2018	accession	Accession/ genotype
Iron	Sorghum	B2300	3.5	Botswana	Motlhaudi et al. 2018	accession	Accession/ genotype
Iron	Sorghum	N53	2.5	Namibia	Motlhaudi et al. 2018	accession	Accession/ genotype
Iron	Sorghum	N64	3.7	Namibia	Motlhaudi et al. 2018	accession	Accession/ genotype
Iron	Sorghum	N147	3.5	Namibia	Motlhaudi et al. 2018	accession	Accession/ genotype
Iron	Sorghum	N218	2.5	Namibia	Motlhaudi et al. 2018	accession	Accession/ genotype
Iron	Sorghum	N406	4	Namibia	Motlhaudi et al. 2018	accession	Accession/ genotype
Iron	Sorghum	S65	3.4	Swaziland	Motlhaudi et al. 2018	accession	Accession/ genotype
Iron	Sorghum	S201	3.6	Swaziland	Motlhaudi et al. 2018	accession	Accession/ genotype
Iron	Sorghum	S273	3.3	Swaziland	Motlhaudi et al. 2018	accession	Accession/ genotype
Iron	Sorghum	S386	3.2	Swaziland	Motlhaudi et al. 2018	accession	Accession/ genotype
Iron	Sorghum	S509	2.9	Swaziland	Motlhaudi et al. 2018	accession	Accession/ genotype
Iron	Sorghum	S622	3.2	Swaziland	Motlhaudi et al. 2018	accession	Accession/ genotype
Iron	Sorghum	ZMB3947	4.2	Zambia	Motlhaudi et al. 2018	accession	Accession/ genotype
Iron	Sorghum	ZMB6986	3.8	Zambia	Motlhaudi et al. 2018	accession	Accession/ genotype
Iron	Sorghum	ZMB7102	3.4	Zambia	Motlhaudi et al. 2018	accession	Accession/ genotype
Iron	Sorghum	ZIM1317	3.2	Zimbabwe	Motlhaudi et al. 2018	accession	Accession/ genotype
Iron	Sorghum	ZIM1522	3.3	Zimbabwe	Motlhaudi et al. 2018	accession	Accession/ genotype
Iron	Sorghum	ZIM1704	3.2	Zimbabwe	Motlhaudi et al. 2018	accession	Accession/ genotype
Iron	Sorghum	69029	5.65	South Africa	Shegro et al. 2012	accession	Accession/ genotype	landraces
Iron	Sorghum	69030	5.6	South Africa	Shegro et al. 2012	accession	Accession/ genotype	landraces
Iron	Sorghum	69032	4.11	South Africa	Shegro et al. 2012	accession	Accession/ genotype	landraces
Iron	Sorghum	69127	7.42	South Africa	Shegro et al. 2012	accession	Accession/ genotype	landraces
Iron	Sorghum	69128	8.65	South Africa	Shegro et al. 2012	accession	Accession/ genotype	landraces
Iron	Sorghum	69147	4.8	South Africa	Shegro et al. 2012	accession	Accession/ genotype	landraces
Iron	Sorghum	69164	5.2	South Africa	Shegro et al. 2012	accession	Accession/ genotype	landraces
Iron	Sorghum	69165	8.61	South Africa	Shegro et al. 2012	accession	Accession/ genotype	landraces
Iron	Sorghum	69538	5.6	South Africa	Shegro et al. 2012	accession	Accession/ genotype	landraces
Iron	Sorghum	223525	10.7	South Africa	Shegro et al. 2012	accession	Accession/ genotype	landraces
Iron	Sorghum	223543	5.47	South Africa	Shegro et al. 2012	accession	Accession/ genotype	landraces
Iron	Sorghum	223548	12.75	South Africa	Shegro et al. 2012	accession	Accession/ genotype	landraces
Iron	Sorghum	223551	5.37	South Africa	Shegro et al. 2012	accession	Accession/ genotype	landraces
Iron	Sorghum	223552	6.2	South Africa	Shegro et al. 2012	accession	Accession/ genotype	landraces
Iron	Sorghum	223554	7.35	South Africa	Shegro et al. 2012	accession	Accession/ genotype	landraces
Iron	Sorghum	223555	6.56	South Africa	Shegro et al. 2012	accession	Accession/ genotype	landraces
Iron	Sorghum	223558	6.06	South Africa	Shegro et al. 2012	accession	Accession/ genotype	landraces
Iron	Sorghum	228736	7.85	South Africa	Shegro et al. 2012	accession	Accession/ genotype	landraces
Iron	Sorghum	228739	5.75	South Africa	Shegro et al. 2012	accession	Accession/ genotype	landraces
Iron	Sorghum	228740	5.22	South Africa	Shegro et al. 2012	accession	Accession/ genotype	landraces
Iron	Sorghum	228741	4.9	South Africa	Shegro et al. 2012	accession	Accession/ genotype	landraces
Iron	Sorghum	228919	5.33	South Africa	Shegro et al. 2012	accession	Accession/ genotype	landraces
Iron	Sorghum	229831	4.31	South Africa	Shegro et al. 2012	accession	Accession/ genotype	landraces
Iron	Sorghum	229832	6.41	South Africa	Shegro et al. 2012	accession	Accession/ genotype	landraces
Iron	Sorghum	229833	5.31	South Africa	Shegro et al. 2012	accession	Accession/ genotype	landraces
Iron	Sorghum	229834	4.33	South Africa	Shegro et al. 2012	accession	Accession/ genotype	landraces
Iron	Sorghum	229835	6.65	South Africa	Shegro et al. 2012	accession	Accession/ genotype	landraces
Iron	Sorghum	229838	5.02	South Africa	Shegro et al. 2012	accession	Accession/ genotype	landraces
Iron	Sorghum	237762	4.53	South Africa	Shegro et al. 2012	accession	Accession/ genotype	landraces
Iron	Sorghum	237763	4.35	South Africa	Shegro et al. 2012	accession	Accession/ genotype	landraces
Iron	Sorghum	237779	4.15	South Africa	Shegro et al. 2012	accession	Accession/ genotype	landraces
Iron	Sorghum	GBK 44669	6.3	Kenya	Otieno et al. 2021	variety	variety
Iron	Sorghum	GBK 44672	4.75	Kenya	Otieno et al. 2021	variety	variety
Iron	Sorghum	GBK 44626	4.04	Kenya	Otieno et al. 2021	variety	variety
Iron	Sorghum	GBK004251	4.26	Kenya	Otieno et al. 2021	variety	variety
Iron	Sorghum	GBK 51843	5.36	Tanzania	Otieno et al. 2021	variety	variety
Iron	Sorghum	GBK 51759	5.23	Tanzania	Otieno et al. 2021	variety	variety
Iron	Sorghum	GBK 051855	6.73	Tanzania	Otieno et al. 2021	variety	variety
Iron	Sorghum	GBK 51737	10.4	Uganda	Otieno et al. 2021	variety	variety
Iron	Sorghum	GBK051746	5.99	Uganda	Otieno et al. 2021	variety	variety
Iron	Sorghum	GBK051744	5.23	Uganda	Otieno et al. 2021	variety	variety
Iron	Sorghum	602	4.279	USA	Upadhyaya et al. 2019	accession	Accession/ genotype
Iron	Sorghum	1004	2.851	India	Upadhyaya et al. 2019	accession	Accession/ genotype
Iron	Sorghum	1212	4.357	China	Upadhyaya et al. 2019	accession	Accession/ genotype
Iron	Sorghum	1233	4.846	China	Upadhyaya et al. 2019	accession	Accession/ genotype
Iron	Sorghum	4515	2.836	India	Upadhyaya et al. 2019	accession	Accession/ genotype
Iron	Sorghum	4698	2.391	India	Upadhyaya et al. 2019	accession	Accession/ genotype
Iron	Sorghum	4951	4.19	India	Upadhyaya et al. 2019	accession	Accession/ genotype
Iron	Sorghum	5094	3.257	India	Upadhyaya et al. 2019	accession	Accession/ genotype
Iron	Sorghum	7305	3.725	Nigeria	Upadhyaya et al. 2019	accession	Accession/ genotype
Iron	Sorghum	13549	3.004	Mexico	Upadhyaya et al. 2019	accession	Accession/ genotype
Iron	Sorghum	14861	3.313	Cameroon	Upadhyaya et al. 2019	accession	Accession/ genotype
Iron	Sorghum	15466	2.807	Cameroon	Upadhyaya et al. 2019	accession	Accession/ genotype
Iron	Sorghum	15744	2.723	Cameroon	Upadhyaya et al. 2019	accession	Accession/ genotype
Iron	Sorghum	16382	4.655	Cameroon	Upadhyaya et al. 2019	accession	Accession/ genotype
Iron	Sorghum	17941	2.983	India	Upadhyaya et al. 2019	accession	Accession/ genotype
Iron	Sorghum	20743	4.618	USA	Upadhyaya et al. 2019	accession	Accession/ genotype
Iron	Sorghum	20956	3.506	Indonesia	Upadhyaya et al. 2019	accession	Accession/ genotype
Iron	Sorghum	23216	3.336	Zambia	Upadhyaya et al. 2019	accession	Accession/ genotype
Iron	Sorghum	23590	3.038	Ethiopia	Upadhyaya et al. 2019	accession	Accession/ genotype
Iron	Sorghum	23684	3.914	Mozambique	Upadhyaya et al. 2019	accession	Accession/ genotype
Iron	Sorghum	23891	3.159	Yemen	Upadhyaya et al. 2019	accession	Accession/ genotype
Iron	Sorghum	24139	4.184	Tanzania	Upadhyaya et al. 2019	accession	Accession/ genotype
Iron	Sorghum	24939	4.213	Zambia	Upadhyaya et al. 2019	accession	Accession/ genotype
Iron	Sorghum	26484	4.1	Benin	Upadhyaya et al. 2019	accession	Accession/ genotype
Iron	Sorghum	28141	3.441	Yemen	Upadhyaya et al. 2019	accession	Accession/ genotype
Iron	Sorghum	28313	4.793	Yemen	Upadhyaya et al. 2019	accession	Accession/ genotype
Iron	Sorghum	30383	4.505	China	Upadhyaya et al. 2019	accession	Accession/ genotype
Iron	Sorghum	31714	3.299	Yemen	Upadhyaya et al. 2019	accession	Accession/ genotype
Iron	Sorghum	gbango	4.25	Benin Republic	Kayode et al. 2006	genotype	Accession/ genotype
Iron	Sorghum	sakarabokuru a	6.41	Benin Republic	Kayode et al. 2006	genotype	Accession/ genotype
Iron	Sorghum	yerekou	4.5	Benin Republic	Kayode et al. 2006	genotype	Accession/ genotype
Iron	Sorghum	kobatia binyirou	9.25	Benin Republic	Kayode et al. 2006	genotype	Accession/ genotype
Iron	Sorghum	tokogbessenou a	6.8	Benin Republic	Kayode et al. 2006	genotype	Accession/ genotype
Iron	Sorghum	yibere kanyinse	5.1	Benin Republic	Kayode et al. 2006	genotype	Accession/ genotype
Iron	Sorghum	fara bonbo	4.6	Benin Republic	Kayode et al. 2006	genotype	Accession/ genotype
Iron	Sorghum	gourouma dobi	9.9	Benin Republic	Kayode et al. 2006	genotype	Accession/ genotype
Iron	Sorghum	yinan b	4.7	Benin Republic	Kayode et al. 2006	genotype	Accession/ genotype
Iron	Sorghum	chabikouman	4.05	Benin Republic	Kayode et al. 2006	genotype	Accession/ genotype
Iron	Sorghum	yowinka a	4.8	Benin Republic	Kayode et al. 2006	genotype	Accession/ genotype
Iron	Sorghum	yowinka b	7.7	Benin Republic	Kayode et al. 2006	genotype	Accession/ genotype
Iron	Sorghum	sotakaman a	5.55	Benin Republic	Kayode et al. 2006	genotype	Accession/ genotype
Iron	Sorghum	sotakaman b	4.25	Benin Republic	Kayode et al. 2006	genotype	Accession/ genotype
Iron	Sorghum	mousseman	5.65	Benin Republic	Kayode et al. 2006	genotype	Accession/ genotype
Iron	Sorghum	agbanni	4.75	Benin Republic	Kayode et al. 2006	genotype	Accession/ genotype
Iron	Sorghum	kassassahan	6.85	Benin Republic	Kayode et al. 2006	genotype	Accession/ genotype
Iron	Sorghum	zopira	6.3	Benin Republic	Kayode et al. 2006	genotype	Accession/ genotype
Iron	Sorghum	semoutche	5.35	Benin Republic	Kayode et al. 2006	genotype	Accession/ genotype
Iron	Sorghum	gaouri oleri	4	Benin Republic	Kayode et al. 2006	genotype	Accession/ genotype
Iron	Sorghum	zogua a	6.3	Benin Republic	Kayode et al. 2006	genotype	Accession/ genotype
Iron	Sorghum	moussi	6.3	Benin Republic	Kayode et al. 2006	genotype	Accession/ genotype
Iron	Sorghum	sobaki	8.6	Benin Republic	Kayode et al. 2006	genotype	Accession/ genotype
Iron	Sorghum	mahi a	3.85	Benin Republic	Kayode et al. 2006	genotype	Accession/ genotype
Iron	Sorghum	mahi b	7.95	Benin Republic	Kayode et al. 2006	genotype	Accession/ genotype
Iron	Sorghum	yabakawerou	6.7	Benin Republic	Kayode et al. 2006	genotype	Accession/ genotype
Iron	Sorghum	gantim	7.45	Benin Republic	Kayode et al. 2006	genotype	Accession/ genotype
Iron	Sorghum	sopoya	3.15	Benin Republic	Kayode et al. 2006	genotype	Accession/ genotype
Iron	Sorghum	sodaya	7.2	Benin Republic	Kayode et al. 2006	genotype	Accession/ genotype
Iron	Sorghum	saga pica	5.55	Benin Republic	Kayode et al. 2006	genotype	Accession/ genotype
Iron	Sorghum	hannitchre	4	Benin Republic	Kayode et al. 2006	genotype	Accession/ genotype
Iron	Sorghum	koussoubakou	3.86	Benin Republic	Kayode et al. 2006	genotype	Accession/ genotype
Iron	Sorghum	yebode	9.4	Benin Republic	Kayode et al. 2006	genotype	Accession/ genotype
Iron	Sorghum	mahi swan	5.63	Benin Republic	Kayode et al. 2006	genotype	Accession/ genotype
Iron	Sorghum	dobi konouyirou	5.87	Benin Republic	Kayode et al. 2006	genotype	Accession/ genotype
Iron	Sorghum	talemoula a	4.78	Benin Republic	Kayode et al. 2006	genotype	Accession/ genotype
Iron	Sorghum	chassissoya	6.03	Benin Republic	Kayode et al. 2006	genotype	Accession/ genotype
Iron	Sorghum	natisoya	3.93	Benin Republic	Kayode et al. 2006	genotype	Accession/ genotype
Iron	Sorghum	sakarabokuru b	5.63	Benin Republic	Kayode et al. 2006	genotype	Accession/ genotype
Iron	Sorghum	hanni kpare	5.9	Benin Republic	Kayode et al. 2006	genotype	Accession/ genotype
Iron	Sorghum	okogbessenou	6.15	Benin Republic	Kayode et al. 2006	genotype	Accession/ genotype
Iron	Sorghum	soniya b	6.35	Benin Republic	Kayode et al. 2006	genotype	Accession/ genotype
Iron	Sorghum	kouwekifounan	6.65	Benin Republic	Kayode et al. 2006	genotype	Accession/ genotype
Iron	Sorghum	kpri hanni	6.8	Benin Republic	Kayode et al. 2006	genotype	Accession/ genotype
Iron	Sorghum	Tx430	6	South Africa	NG'UNI et al. 2016	variety	variety
Iron	Sorghum	SSP013	4.63	South Africa	NG'UNI et al. 2016	variety	variety
Iron	Sorghum	E35-1	5.3	South Africa	NG'UNI et al. 2016	variety	variety
Iron	Sorghum	SA1785	5.98	South Africa	NG'UNI et al. 2016	variety	variety
Iron	Sorghum	SA1794	5.17	South Africa	NG'UNI et al. 2016	variety	variety
Iron	Sorghum	IS1934	5.69	South Africa	NG'UNI et al. 2016	variety	variety
Iron	Sorghum	SDS1594	4.56	South Africa	NG'UNI et al. 2016	variety	variety
Iron	Sorghum	CY917/1	4.81	South Africa	NG'UNI et al. 2016	variety	variety
Iron	Sorghum	Transk RED No. 2	4.81	South Africa	NG'UNI et al. 2016	variety	variety
Iron	Sorghum	Framida	6.01	South Africa	NG'UNI et al. 2016	variety	variety
Iron	Sorghum	AR-3048	4.69	South Africa	NG'UNI et al. 2016	variety	variety
Iron	Sorghum	IS10364	4.8	South Africa	NG'UNI et al. 2016	variety	variety
Iron	Sorghum	OK11	4.69	South Africa	NG'UNI et al. 2016	variety	variety
Iron	Sorghum	CIMMYT Entry 49	4.57	South Africa	NG'UNI et al. 2016	variety	variety
Iron	Sorghum	Tx2880	4.89	South Africa	NG'UNI et al. 2016	variety	variety
Iron	Sorghum	IS14380	6.12	South Africa	NG'UNI et al. 2016	variety	variety
Iron	Sorghum	IS14384	5.13	South Africa	NG'UNI et al. 2016	variety	variety
Iron	Sorghum	2426 DCDB Bop Nonoeba	4.69	South Africa	NG'UNI et al. 2016	variety	variety
Iron	Sorghum	2426 DCDB Bop Welgeval	4.62	South Africa	NG'UNI et al. 2016	variety	variety
Iron	Sorghum	Macia	4.55	South Africa	NG'UNI et al. 2016	variety	variety
Iron	Sorghum	ICSV112	5.08	South Africa	NG'UNI et al. 2016	variety	variety
Iron	Sorghum	Sima	5.36	South Africa	NG'UNI et al. 2016	variety	variety
Iron	Sorghum	Kuyuma	4.37	South Africa	NG'UNI et al. 2016	variety	variety
Iron	Sorghum	SSP019	4.63	South Africa	NG'UNI et al. 2016	variety	variety
Iron	Sorghum	SSP004	5.05	South Africa	NG'UNI et al. 2016	variety	variety
Iron	Sorghum	[Framida x 3845]F6-5	3.5	Zambia	Ng’uni et al. 2011	accession	Accession/ genotype	farmer/ improved varieties
Iron	Sorghum	ELT-1-17	4.21	Zambia	Ng’uni et al. 2011	accession	Accession/ genotype	farmer/ improved varieties
Iron	Sorghum	Kuyuma	4.61	Zambia	Ng’uni et al. 2011	accession	Accession/ genotype	farmer/ improved varieties
Iron	Sorghum	Maci	3.51	Zambia	Ng’uni et al. 2011	accession	Accession/ genotype	farmer/ improved varieties
Iron	Sorghum	MMSH-1040	4.51	Zambia	Ng’uni et al. 2011	accession	Accession/ genotype	farmer/ improved varieties
Iron	Sorghum	MMSH-1257	5.05	Zambia	Ng’uni et al. 2011	accession	Accession/ genotype	farmer/ improved varieties
Iron	Sorghum	MMSH-1324	3.79	Zambia	Ng’uni et al. 2011	accession	Accession/ genotype	farmer/ improved varieties
Iron	Sorghum	MMSH-1346	3.61	Zambia	Ng’uni et al. 2011	accession	Accession/ genotype	farmer/ improved varieties
Iron	Sorghum	MMSH-1365	4.25	Zambia	Ng’uni et al. 2011	accession	Accession/ genotype	farmer/ improved varieties
Iron	Sorghum	MMSH-375	3.46	Zambia	Ng’uni et al. 2011	accession	Accession/ genotype	farmer/ improved varieties
Iron	Sorghum	MMSH-740	3.97	Zambia	Ng’uni et al. 2011	accession	Accession/ genotype	farmer/ improved varieties
Iron	Sorghum	Sima	3.23	Zambia	Ng’uni et al. 2011	accession	Accession/ genotype	farmer/ improved varieties
Iron	Sorghum	ZSV-15	3.93	Zambia	Ng’uni et al. 2011	accession	Accession/ genotype	farmer/ improved varieties
Iron	Sorghum	MW1781	3.7	Zambia	Ng’uni et al. 2011	accession	Accession/ genotype	farmer/ improved varieties
Iron	Sorghum	MW1788	3.2	Malawi	Ng’uni et al. 2011	accession	Accession/ genotype	farmer/ improved varieties
Iron	Sorghum	MW1798	3.85	Malawi	Ng’uni et al. 2011	accession	Accession/ genotype	farmer/ improved varieties
Iron	Sorghum	MW409	2.83	Malawi	Ng’uni et al. 2011	accession	Accession/ genotype	farmer/ improved varieties
Iron	Sorghum	MW467	3.35	Malawi	Ng’uni et al. 2011	accession	Accession/ genotype	farmer/ improved varieties
Iron	Sorghum	MW679	3.9	Malawi	Ng’uni et al. 2011	accession	Accession/ genotype	farmer/ improved varieties
Iron	Sorghum	MW734	6.63	Malawi	Ng’uni et al. 2011	accession	Accession/ genotype	farmer/ improved varieties
Iron	Sorghum	TZ3866	3.9	Tanzania	Ng’uni et al. 2011	accession	Accession/ genotype	farmer/ improved varieties
Iron	Sorghum	TZ3938	4.67	Tanzania	Ng’uni et al. 2011	accession	Accession/ genotype	farmer/ improved varieties
Iron	Sorghum	TZ3966	5.41	Tanzania	Ng’uni et al. 2011	accession	Accession/ genotype	farmer/ improved varieties
Iron	Sorghum	TZ4031	5.27	Tanzania	Ng’uni et al. 2011	accession	Accession/ genotype	farmer/ improved varieties
Iron	Sorghum	TZ4255	5.78	Tanzania	Ng’uni et al. 2011	accession	Accession/ genotype	farmer/ improved varieties
Iron	Sorghum	ZMB3947	4.51	Zambia	Ng’uni et al. 2011	accession	Accession/ genotype	farmer/ improved varieties
Iron	Sorghum	ZMB4859	4.12	Zambia	Ng’uni et al. 2011	accession	Accession/ genotype	farmer/ improved varieties
Iron	Sorghum	ZMB5076	3.4	Zambia	Ng’uni et al. 2011	accession	Accession/ genotype	farmer/ improved varieties
Iron	Sorghum	ZMB5395	4.04	Zambia	Ng’uni et al. 2011	accession	Accession/ genotype	farmer/ improved varieties
Iron	Sorghum	ZMB5788	8.03	Zambia	Ng’uni et al. 2011	accession	Accession/ genotype	farmer/ improved varieties
Iron	Sorghum	ZMB6733	3.72	Zambia	Ng’uni et al. 2011	accession	Accession/ genotype	farmer/ improved varieties
Iron	Sorghum	ZMB6847	2.93	Zambia	Ng’uni et al. 2011	accession	Accession/ genotype	farmer/ improved varieties
Iron	Sorghum	ZMB6956	2.79	Zambia	Ng’uni et al. 2011	accession	Accession/ genotype	farmer/ improved varieties
Iron	Sorghum	ZMB6986	4.38	Zambia	Ng’uni et al. 2011	accession	Accession/ genotype	farmer/ improved varieties
Iron	Sorghum	ZMB7104	3.44	Zambia	Ng’uni et al. 2011	accession	Accession/ genotype	farmer/ improved varieties
Iron	Sorghum	ZMB7105	3.55	Zambia	Ng’uni et al. 2011	accession	Accession/ genotype	farmer/ improved varieties
Iron	Sorghum	ZMB7111	4.81	Zambia	Ng’uni et al. 2011	accession	Accession/ genotype	farmer/ improved varieties
Iron	Sorghum	ZMB7198	4.11	Zambia	Ng’uni et al. 2011	accession	Accession/ genotype	farmer/ improved varieties
Iron	Sorghum	ZMB7202	3.18	Zambia	Ng’uni et al. 2011	accession	Accession/ genotype	farmer/ improved varieties
Iron	Sorghum	ZMB7207	3.56	Zambia	Ng’uni et al. 2011	accession	Accession/ genotype	farmer/ improved varieties
Iron	Sorghum	RSC1	1.18	Germany	Abdelhalim et al. 2019	genotype	Accession/ genotype	wild
Iron	Sorghum	RSC2	1.28	Germany	Abdelhalim et al. 2019	genotype	Accession/ genotype	wild
Iron	Sorghum	WSG1	1.32	Germany	Abdelhalim et al. 2019	genotype	Accession/ genotype	wild
Iron	Sorghum	WSG2	1.3	Germany	Abdelhalim et al. 2019	genotype	Accession/ genotype	wild
Iron	Sorghum	WSG3	1.49	Germany	Abdelhalim et al. 2019	genotype	Accession/ genotype	wild
Iron	Sorghum	WSG4	1.61	Germany	Abdelhalim et al. 2019	genotype	Accession/ genotype	wild
Iron	Sorghum	WSG5	1.59	Germany	Abdelhalim et al. 2019	genotype	Accession/ genotype	wild
Iron	Sorghum	WSG6	1.4	Germany	Abdelhalim et al. 2019	genotype	Accession/ genotype	wild
Iron	Sorghum	WSG7	1.64	Germany	Abdelhalim et al. 2019	genotype	Accession/ genotype	wild
Iron	Sorghum	WSG8	1.34	Germany	Abdelhalim et al. 2019	genotype	Accession/ genotype	wild
Iron	Sorghum	WSG9	1.91	Germany	Abdelhalim et al. 2019	genotype	Accession/ genotype	wild
Iron	Sorghum	WSG10	1.2	Germany	Abdelhalim et al. 2019	genotype	Accession/ genotype	wild
Iron	Sorghum	55	5.4	US	Kumar et al. 2012	germplasm accession	Accession/ genotype
Iron	Sorghum	3760	5.3	USSR	Kumar et al. 2012	germplasm accession	Accession/ genotype
Iron	Sorghum	3283	5	US	Kumar et al. 2012	germplasm accession	Accession/ genotype
Iron	Sorghum	17580	5	Nigeria	Kumar et al. 2012	germplasm accession	Accession/ genotype
Iron	Sorghum	15952	4.9	Cameroon	Kumar et al. 2012	germplasm accession	Accession/ genotype
Iron	Sorghum	3813	4.9	India	Kumar et al. 2012	germplasm accession	Accession/ genotype
Iron	Sorghum	15266	4.9	Cameroon	Kumar et al. 2012	germplasm accession	Accession/ genotype
Iron	Sorghum	2939	4.8	US	Kumar et al. 2012	germplasm accession	Accession/ genotype
Iron	Sorghum	4159	4.8	India	Kumar et al. 2012	germplasm accession	Accession/ genotype
Iron	Sorghum	3929	4.8	US	Kumar et al. 2012	germplasm accession	Accession/ genotype
Iron	Sorghum	3443	4.7	Sudan	Kumar et al. 2012	germplasm accession	Accession/ genotype
Iron	Sorghum	3925	4.7	US	Kumar et al. 2012	germplasm accession	Accession/ genotype
Iron	Sorghum	5460	4.7	India	Kumar et al. 2012	germplasm accession	Accession/ genotype
Iron	Sorghum	12452	4.7	Sudan	Kumar et al. 2012	germplasm accession	Accession/ genotype
Iron	Sorghum	2801	4.6	Zimbabwe	Kumar et al. 2012	germplasm accession	Accession/ genotype
Iron	Sorghum	2536	4.5	US	Kumar et al. 2012	germplasm accession	Accession/ genotype
Iron	Sorghum	5429	4.4	India	Kumar et al. 2012	germplasm accession	Accession/ genotype
Iron	Sorghum	356	4.4	US	Kumar et al. 2012	germplasm accession	Accession/ genotype
Iron	Sorghum	2265	4.4	Sudan	Kumar et al. 2012	germplasm accession	Accession/ genotype
Iron	Sorghum	12695	4.4	South Africa	Kumar et al. 2012	germplasm accession	Accession/ genotype
Iron	Sorghum	5538	4.4	India	Kumar et al. 2012	germplasm accession	Accession/ genotype
Iron	Sorghum	5476	4.1	India	Kumar et al. 2012	germplasm accession	Accession/ genotype
Iron	Sorghum	16337	4.1	Cameroon	Kumar et al. 2012	germplasm accession	Accession/ genotype
Iron	Sorghum	5853	4.1	India	Kumar et al. 2012	germplasm accession	Accession/ genotype
Iron	Sorghum	14318	3.9	Swaziland	Kumar et al. 2012	germplasm accession	Accession/ genotype
Iron	Sorghum	10674	3.9	China	Kumar et al. 2012	germplasm accession	Accession/ genotype
Iron	Sorghum	22215	2.6	USSR	Kumar et al. 2012	germplasm accession	Accession/ genotype
Iron	Sorghum	CSH 15R	3.92	India	Mishra et al. 2015	cultivars	variety
Iron	Sorghum	M 35-1	3.43	India	Mishra et al. 2015	cultivars	variety
Iron	Sorghum	Phule Chitra	3.9	India	Mishra et al. 2015	cultivars	variety
Iron	Sorghum	Phule Maulee	4.15	India	Mishra et al. 2015	cultivars	variety
Iron	Sorghum	Phule Yashoda	3.64	India	Mishra et al. 2015	cultivars	variety
Iron	Sorghum	Phule Vasudha	4.13	India	Chavan et al. 2009	cultivars	variety
Iron	Sorghum	Phule Anuradha	4.28	India	Chavan et al. 2009	cultivars	variety
Iron	Sorghum	CSV 22	5.98	India	Chavan et al. 2009	cultivars	variety
Iron	Sorghum	Phule Maulee	4.93	India	Chavan et al. 2009	cultivars	variety
Iron	Sorghum	Phule Chitra	5.84	India	Chavan et al. 2009	cultivars	variety
Iron	Sorghum	Sel-3	4.75	India	Chavan et al. 2009	cultivars	variety
Iron	Sorghum	Phule Yashoda	5.78	India	Chavan et al. 2009	cultivars	variety
Iron	Sorghum	M 35-1	5.48	India	Chavan et al. 2009	cultivars	variety
Iron	Sorghum	RPASV-3	4.98	India	Chavan et al. 2015	variety	variety
Iron	Sorghum	Pandhari chikni	4.14	India	Chavan et al. 2015	variety	variety
Iron	Sorghum	Dadar local	4.36	India	Chavan et al. 2015	variety	variety
Iron	Sorghum	M-35-1	4.88	India	Chavan et al. 2015	variety	variety
Iron	Sorghum	Phule Revati	4.15	India	Chavan et al. 2015	variety	variety
Iron	Sorghum	SPH-1620	4.74	India	Chavan et al. 2015	variety	variety
Iron	Sorghum	CSH-15R	4.11	India	Chavan et al. 2015	variety	variety
Iron	Sorghum	POOLED	3.9	India, FCT	Longvah et al. 2017	pooled variety	variety
Iron	Sorghum	POOLED	4.1	Tanzania, FCT	Lukmanji et al. 2008	pooled variety	variety
Iron	Sorghum	POOLED	11	Malawi, FCT	Van Graan et al. 2019	pooled variety	variety
Iron	Sorghum	POOLED	4.5	Pakistan, FCT	2001	pooled variety	variety
Iron	Sorghum	POOLED	5.8	Nepal, FCT	Govt of Nepal, 2017	pooled variety	variety
Iron	Sorghum	216737	3.765	Ethiopia	Gerrano et al. 2016	genotype	Accession/ genotype
Iron	Sorghum	216743	3.125	Ethiopia	Gerrano et al. 2016	genotype	Accession/ genotype
Iron	Sorghum	Birmash	2.615	Ethiopia	Gerrano et al. 2016	genotype	Accession/ genotype
Iron	Sorghum	Gambella-1107	2.825	Ethiopia	Gerrano et al. 2016	genotype	Accession/ genotype
Iron	Sorghum	IS9302	3.13	Ethiopia	Gerrano et al. 2016	genotype	Accession/ genotype
Iron	Sorghum	Baji	2.73	Ethiopia	Gerrano et al. 2016	genotype	Accession/ genotype
Iron	Sorghum	97MW6129	2.48	Ethiopia	Gerrano et al. 2016	genotype	Accession/ genotype
Iron	Sorghum	97MW6127	2.76	Ethiopia	Gerrano et al. 2016	genotype	Accession/ genotype
Iron	Sorghum	NO253	2.84	Ethiopia	Gerrano et al. 2016	genotype	Accession/ genotype
Iron	Sorghum	PI308453	2.64	Ethiopia	Gerrano et al. 2016	genotype	Accession/ genotype
Iron	Sorghum	97MW6113	2.51	Ethiopia	Gerrano et al. 2016	genotype	Accession/ genotype
Iron	Sorghum	Macia-SA	2.81	Ethiopia	Gerrano et al. 2016	genotype	Accession/ genotype
Iron	Sorghum	M48	2.6	Ethiopia	Gerrano et al. 2016	genotype	Accession/ genotype
Iron	Sorghum	M141	2.25	Ethiopia	Gerrano et al. 2016	genotype	Accession/ genotype
Iron	Sorghum	M81	2.79	Ethiopia	Gerrano et al. 2016	genotype	Accession/ genotype
Iron	Sorghum	M105	2.5	Ethiopia	Gerrano et al. 2016	genotype	Accession/ genotype
Iron	Sorghum	M26	2.43	Ethiopia	Gerrano et al. 2016	genotype	Accession/ genotype
Iron	Sorghum	M101	2.87	Ethiopia	Gerrano et al. 2016	genotype	Accession/ genotype
Iron	Sorghum	M163	3.2	Ethiopia	Gerrano et al. 2016	genotype	Accession/ genotype
Iron	Sorghum	Masekaswere	2.9	Ethiopia	Gerrano et al. 2016	genotype	Accession/ genotype
Iron	Sorghum	Mamolokwane	2.62	Ethiopia	Gerrano et al. 2016	genotype	Accession/ genotype
Iron	Sorghum	M153	2.91	Ethiopia	Gerrano et al. 2016	genotype	Accession/ genotype
Iron	Sorghum	RV03	36.65	Italy	Poniteri et al. 2017	cultivar	variety	hybrids
Iron	Sorghum	RV05	55.26	Italy	Poniteri et al. 2017	cultivar	variety	hybrids
Iron	Sorghum	RV06	35.39	Italy	Poniteri et al. 2017	cultivar	variety	hybrids
Iron	Sorghum	RV07	35.86	Italy	Poniteri et al. 2017	cultivar	variety	hybrids
Iron	Sorghum	RV08	31.7	Italy	Poniteri et al. 2017	cultivar	variety	hybrids
Iron	Sorghum	BO1	24.57	Italy	Poniteri et al. 2017	cultivar	variety	hybrids
Iron	Sorghum	NSH 703	4.4	India	Ashok Kumar et al. 2011	hybrids	variety	cultivar
Iron	Sorghum	GK 4035	4.4	India	Ashok Kumar et al. 2011	hybrids	variety	cultivar
Iron	Sorghum	Mahabeej 703	4.3	India	Ashok Kumar et al. 2011	hybrids	variety	cultivar
Iron	Sorghum	NSH 702	4.3	India	Ashok Kumar et al. 2011	hybrids	variety	cultivar
Iron	Sorghum	8562	4.1	India	Ashok Kumar et al. 2011	hybrids	variety	cultivar
Iron	Sorghum	Mahabeej 704	4	India	Ashok Kumar et al. 2011	hybrids	variety	cultivar
Iron	Sorghum	KDSH 1179	3.9	India	Ashok Kumar et al. 2011	hybrids	variety	cultivar
Iron	Sorghum	BSH 45	3.9	India	Ashok Kumar et al. 2011	hybrids	variety	cultivar
Iron	Sorghum	Madhura-SS hybrid	3.9	India	Ashok Kumar et al. 2011	hybrids	variety	cultivar
Iron	Sorghum	Mahabeej 7	3.9	India	Ashok Kumar et al. 2011	hybrids	variety	cultivar
Iron	Sorghum	GK 4009	3.8	India	Ashok Kumar et al. 2011	hybrids	variety	cultivar
Iron	Sorghum	Hi - Jowar 52	3.8	India	Ashok Kumar et al. 2011	hybrids	variety	cultivar
Iron	Sorghum	PSV 2	3.8	India	Ashok Kumar et al. 2011	hybrids	variety	cultivar
Iron	Sorghum	CSH 25	3.7	India	Ashok Kumar et al. 2011	hybrids	variety	cultivar
Iron	Sorghum	8340	3.7	India	Ashok Kumar et al. 2011	hybrids	variety	cultivar
Iron	Sorghum	KDSH 209	3.6	India	Ashok Kumar et al. 2011	hybrids	variety	cultivar
Iron	Sorghum	PSV 1	3.6	India	Ashok Kumar et al. 2011	hybrids	variety	cultivar
Iron	Sorghum	BSH 47	3.5	India	Ashok Kumar et al. 2011	hybrids	variety	cultivar
Iron	Sorghum	GK 4044	3.3	India	Ashok Kumar et al. 2011	hybrids	variety	cultivar
Iron	Sorghum	8568	3	India	Ashok Kumar et al. 2011	hybrids	variety	cultivar
Iron	Sorghum	PVK 801	4.3	India	Ashok Kumar et al. 2011	hybrids	variety	cultivar
Iron	Sorghum	CSH 16	4.1	India	Ashok Kumar et al. 2011	hybrids	variety	cultivar
Iron	Sorghum	PAN8625	3.74	South Africa	Mabelebele et al. 2015	variety	variety
Iron	Sorghum	PAN8816	2.43	South Africa	Mabelebele et al. 2015	variety	variety
Iron	Sorghum	NS5511	2.73	South Africa	Mabelebele et al. 2015	variety	variety
Iron	Sorghum	PAN8906	4.03	South Africa	Mabelebele et al. 2015	variety	variety
Iron	Sorghum	POOLED	3.7	West Africa (FCT)	Stadlmayr et al., 2012	pooled variety	variety
Iron	Sorghum (red)	POOLED	3.4	West Africa (FCT)	Stadlmayr et al., 2012	pooled variety	variety
Iron	Sorghum (red)	POOLED	3	Kenya	Mwai 2018	pooled variety	variety
Iron	Sorghum(Red)	POOLED	4.1	China, FCT	Ershow 1990	pooled variety	variety
Iron	Sorghum(White)	POOLED	3.9	West Africa	Stadlmayr et al., 2012	pooled variety	variety
Iron	Sorghum(White)	POOLED	6.4	Kenya, FCT	Mwai 2018	pooled variety	variety
Iron	Sorghum(White)	POOLED	5.5	China, FCT	Ershow 1990	pooled variety	variety
Iron	Tef	Adama	6.16	Ethiopia	Derib et al. 2018	variety	variety
Iron	Tef	Agirat	3.74	Ethiopia	Derib et al. 2018	variety	variety
Iron	Tef	Ametti	9.7	Ethiopia	Derib et al. 2018	variety	variety
Iron	Tef	Areriti	4.77	Ethiopia	Derib et al. 2018	variety	variety
Iron	Tef	Bolo Giorgis	11.12	Ethiopia	Derib et al. 2018	variety	variety
Iron	Tef	Bolo Silasie	14.01	Ethiopia	Derib et al. 2018	variety	variety
Iron	Tef	Chelle	9.4	Ethiopia	Derib et al. 2018	variety	variety
Iron	Tef	Kombolcha	10.58	Ethiopia	Derib et al. 2018	variety	variety
Iron	Tef	Korma	34.69	Ethiopia	Derib et al. 2018	variety	variety
Iron	Teff	Boset	16.8	Ethiopia	Abewa et al. 2020	genotype	Accession/ genotype
Iron	Teff	Dima	20.6	Ethiopia	Abewa et al. 2020	genotype	Accession/ genotype
Iron	Teff	Etsub	18.6	Ethiopia	Abewa et al. 2020	genotype	Accession/ genotype
Iron	Teff	Keytena	23.1	Ethiopia	Abewa et al. 2020	genotype	Accession/ genotype
Iron	Teff	Kora	15.1	Ethiopia	Abewa et al. 2020	genotype	Accession/ genotype
Iron	Teff	Magna	19.2	Ethiopia	Abewa et al. 2020	genotype	Accession/ genotype
Iron	Teff	Quncho	18.1	Ethiopia	Abewa et al. 2020	genotype	Accession/ genotype
Iron	Teff	Simada	20.1	Ethiopia	Abewa et al. 2020	genotype	Accession/ genotype
Iron	Teff	Tsedy	20.9	Ethiopia	Abewa et al. 2020	genotype	Accession/ genotype
Iron	Teff	White variety (406W)	8.5	Ethiopia	Tietel et al. 2020	variety	variety
Iron	Teff	Brown variety (405B)	9.4	Ethiopia	Tietel et al. 2020	variety	variety
Zinc	Barnyard millet	IT153591	1.26	Korea	Kim et al. 2011	variety	variety
Zinc	Barnyard millet	IT153599	1.23	Korea	Kim et al. 2011	variety	variety
Zinc	Barnyard millet	IT153600	0.55	Korea	Kim et al. 2011	variety	variety
Zinc	Barnyard millet	IT153604	1.43	Korea	Kim et al. 2011	variety	variety
Zinc	Barnyard millet	IT153607	1.08	Korea	Kim et al. 2011	variety	variety
Zinc	Barnyard millet	IT170609	0.44	Korea	Kim et al. 2011	variety	variety
Zinc	Barnyard millet	IT170610	0.63	Korea	Kim et al. 2011	variety	variety
Zinc	Barnyard millet	IT186707	1.13	Korea	Kim et al. 2011	variety	variety
Zinc	Barnyard millet	K141285	0.99	Korea	Kim et al. 2011	variety	variety
Zinc	Barnyard millet	K141286	0.64	Korea	Kim et al. 2011	variety	variety
Zinc	Barnyard millet	K141287	0.79	Korea	Kim et al. 2011	variety	variety
Zinc	Barnyard millet	K141288	1.23	Korea	Kim et al. 2011	variety	variety
Zinc	Barnyard millet	K141289	0.89	Korea	Kim et al. 2011	variety	variety
Zinc	Barnyard millet	VL21	4.75	India	Panwar et al. 2016	variety	variety
Zinc	Barnyard millet	VL29	4.95	India	Panwar et al. 2016	variety	variety
Zinc	Barnyard millet	VL 172	4.21	India	Panwar et al. 2016	variety	variety
Zinc	Barnyard millet	VL207	5.92	India	Panwar et al. 2016	variety	variety
Zinc	Barnyard millet	PRJ1	4.44	India	Panwar et al. 2016	variety	variety
Zinc	Brown top millet	IC 606693	2.8	India	Niharika et al 2020	genotype	genotype/accession
Zinc	Brown top millet	IC 613546	2.54	India	Niharika et al 2021	genotype	genotype/accession
Zinc	Brown top millet	IC 613547	1.67	India	Niharika et al 2022	genotype	genotype/accession
Zinc	Brown top millet	IC 613548	2.7	India	Niharika et al 2023	genotype	genotype/accession
Zinc	Brown top millet	IC 613549	1.91	India	Niharika et al 2024	genotype	genotype/accession
Zinc	Brown top millet	IC 613550	1.9	India	Niharika et al 2025	genotype	genotype/accession
Zinc	Brown top millet	IC 613551	1.7	India	Niharika et al 2026	genotype	genotype/accession
Zinc	Brown top millet	IC 613552	2.18	India	Niharika et al 2027	genotype	genotype/accession
Zinc	Brown top millet	IC 613553	2.69	India	Niharika et al 2028	genotype	genotype/accession
Zinc	Brown top millet	IC 613554	2.79	India	Niharika et al 2029	genotype	genotype/accession
Zinc	Brown top millet	IC 613555	1.36	India	Niharika et al 2030	genotype	genotype/accession
Zinc	Brown top millet	IC 613556	2.72	India	Niharika et al 2031	genotype	genotype/accession
Zinc	Brown top millet	IC 613557	1.74	India	Niharika et al 2032	genotype	genotype/accession
Zinc	Brown top millet	IC 613558	1.99	India	Niharika et al 2033	genotype	genotype/accession
Zinc	Brown top millet	IC 613559	1.95	India	Niharika et al 2034	genotype	genotype/accession
Zinc	Brown top millet	IC 613560	1.43	India	Niharika et al 2035	genotype	genotype/accession
Zinc	Brown top millet	IC 613561	2.22	India	Niharika et al 2036	genotype	genotype/accession
Zinc	Brown top millet	IC 613562	1.74	India	Niharika et al 2037	genotype	genotype/accession
Zinc	Brown top millet	IC 617952	1.99	India	Niharika et al 2038	genotype	genotype/accession
Zinc	Brown top millet	IC 617953	1.38	India	Niharika et al 2039	genotype	genotype/accession
Zinc	Brown top millet	IC 617954	1.53	India	Niharika et al 2040	genotype	genotype/accession
Zinc	Brown top millet	IC 617955	1.99	India	Niharika et al 2041	genotype	genotype/accession
Zinc	Brown top millet	IC 617956	2.43	India	Niharika et al 2042	genotype	genotype/accession
Zinc	Brown top millet	IC 617957	2.56	India	Niharika et al 2043	genotype	genotype/accession
Zinc	Brown top millet	IC 617958	1.41	India	Niharika et al 2044	genotype	genotype/accession
Zinc	Brown top millet	IC 617959	2.26	India	Niharika et al 2045	genotype	genotype/accession
Zinc	Brown top millet	IC 617960	1.42	India	Niharika et al 2046	genotype	genotype/accession
Zinc	Brown top millet	IC 617961	2.79	India	Niharika et al 2047	genotype	genotype/accession
Zinc	Brown top millet	IC 617962	2.72	India	Niharika et al 2048	genotype	genotype/accession
Zinc	Brown top millet	28 bijapur collection	2.8	India	Niharika et al 2049	genotype	genotype/accession
Zinc	Finger millet	Sri Chaitanya	1.5	India	Udamala et al. 2020	Line/ Genotype	Accession/ genotype
Zinc	Finger millet	Bharathi	1.5	India	Udamala et al. 2020	Line/ Genotype	Accession/ genotype
Zinc	Finger millet	Champavathi	1.6	India	Udamala et al. 2020	Line/ Genotype	Accession/ genotype
Zinc	Finger millet	Vegavathi	1.1	India	Udamala et al. 2020	Line/ Genotype	Accession/ genotype
Zinc	Finger millet	VR 1101	1.2	India	Udamala et al. 2020	Line/ Genotype	Accession/ genotype
Zinc	Finger millet	VR 1110	1.6	India	Udamala et al. 2020	Line/ Genotype	Accession/ genotype
Zinc	Finger millet	VR 1151	1.6	India	Udamala et al. 2020	Line/ Genotype	Accession/ genotype
Zinc	Finger millet	VR 1131	1.1	India	Udamala et al. 2020	Line/ Genotype	Accession/ genotype
Zinc	Finger millet	VR 1125	1.3	India	Udamala et al. 2020	Line/ Genotype	Accession/ genotype
Zinc	Finger millet	VR 1112	1.2	India	Udamala et al. 2020	Line/ Genotype	Accession/ genotype
Zinc	Finger millet	VR 1117	0.9	India	Udamala et al. 2020	Line/ Genotype	Accession/ genotype
Zinc	Finger millet	VL 352	1.5	India	Udamala et al. 2020	Line/ Genotype	Accession/ genotype
Zinc	Finger millet	GPU 67	1	India	Udamala et al. 2020	Line/ Genotype	Accession/ genotype
Zinc	Finger millet	PR 202	1.2	India	Udamala et al. 2020	Line/ Genotype	Accession/ genotype
Zinc	Finger millet	Vakula	1.4	India	Udamala et al. 2020	Line/ Genotype	Accession/ genotype
Zinc	Finger millet	EG 4	1.4	India	Udamala et al. 2020	Line/ Genotype	Accession/ genotype
Zinc	Finger millet	EG 16	1.2	India	Udamala et al. 2020	Line/ Genotype	Accession/ genotype
Zinc	Finger millet	EG 17	1.5	India	Udamala et al. 2020	Line/ Genotype	Accession/ genotype
Zinc	Finger millet	EG 18	3.5	India	Udamala et al. 2020	Line/ Genotype	Accession/ genotype
Zinc	Finger millet	EG 21	1.4	India	Udamala et al. 2020	Line/ Genotype	Accession/ genotype
Zinc	Finger millet	EG 24	1.3	India	Udamala et al. 2020	Line/ Genotype	Accession/ genotype
Zinc	Finger millet	EG 31	1.3	India	Udamala et al. 2020	Line/ Genotype	Accession/ genotype
Zinc	Finger millet	VR 1179	1.5	India	Udamala et al. 2020	Line/ Genotype	Accession/ genotype
Zinc	Finger millet	VR 1174	2.8	India	Udamala et al. 2020	Line/ Genotype	Accession/ genotype
Zinc	Finger millet	EG 48	1.2	India	Udamala et al. 2020	Line/ Genotype	Accession/ genotype
Zinc	Finger millet	VR 1171	2.5	India	Udamala et al. 2020	Line/ Genotype	Accession/ genotype
Zinc	Finger millet	VR1165	1.5	India	Udamala et al. 2020	Line/ Genotype	Accession/ genotype
Zinc	Finger millet	VR1163	1.2	India	Udamala et al. 2020	Line/ Genotype	Accession/ genotype
Zinc	Finger millet	GPU 45	1.6	India	Udamala et al. 2020	Line/ Genotype	Accession/ genotype
Zinc	Finger millet	VL 376	1.3	India	Udamala et al. 2020	Line/ Genotype	Accession/ genotype
Zinc	Finger millet	POOLED	2.5	India, FCT	Longvah et al., 2017	pooled variety	variety
Zinc	Finger millet	POOLED	1.2	Tanzania, FCT	Lukmanji et al. 2008	pooled variety	variety
Zinc	Finger millet	POOLED	2.02	Malawi, FCT	Van Graan et al. 2019	pooled variety	variety
Zinc	Finger millet	POOLED	1.7	Kenya, FCT	Mwai 2018	pooled variety	variety
Zinc	Finger millet	IE 3120	2.53	India	Upadhyaya et al. 2011a	Accession	Accession/ genotype
Zinc	Finger millet	IE 7508	2.41	Ethiopia	Upadhyaya et al. 2011a	Accession	Accession/ genotype
Zinc	Finger millet	IE 6546	2.39	Nigeria	Upadhyaya et al. 2011a	Accession	Accession/ genotype
Zinc	Finger millet	IE 3025	2.36	Ethiopia	Upadhyaya et al. 2011a	Accession	Accession/ genotype
Zinc	Finger millet	IE 7386	2.34	Kenya	Upadhyaya et al. 2011a	Accession	Accession/ genotype
Zinc	Finger millet	IE 7407	2.33	Kenya	Upadhyaya et al. 2011a	Accession	Accession/ genotype
Zinc	Finger millet	IE 615	2.31	India	Upadhyaya et al. 2011a	Accession	Accession/ genotype
Zinc	Finger millet	IE 712	2.29	India	Upadhyaya et al. 2011a	Accession	Accession/ genotype
Zinc	Finger millet	IE 5788	2.28	Nepal	Upadhyaya et al. 2011a	Accession	Accession/ genotype
Zinc	Finger millet	IE 633	2.28	India	Upadhyaya et al. 2011a	Accession	Accession/ genotype
Zinc	Finger millet	IE 2008	2.27	India	Upadhyaya et al. 2011a	Accession	Accession/ genotype
Zinc	Finger millet	IE 1023	2.26	Unknown	Upadhyaya et al. 2011a	Accession	Accession/ genotype
Zinc	Finger millet	IE 886	2.25	Pakistan	Upadhyaya et al. 2011a	Accession	Accession/ genotype
Zinc	Finger millet	IE 4817	2.24	India	Upadhyaya et al. 2011a	Accession	Accession/ genotype
Zinc	Finger millet	IE 510	2.24	India	Upadhyaya et al. 2011a	Accession	Accession/ genotype
Zinc	Finger millet	IE 2043 (PR 202)	1.88	India	Upadhyaya et al. 2011a	Accession	Accession/ genotype
Zinc	Finger millet	IE 3618 (RAU 8)	1.97	India	Upadhyaya et al. 2011a	Accession	Accession/ genotype
Zinc	Finger millet	IE 4673 (VL 149)	2.13	India	Upadhyaya et al. 2011a	Accession	Accession/ genotype
Zinc	Finger millet	VR 708	1.95	India	Upadhyaya et al. 2011a	Accession	Accession/ genotype
Zinc	Finger millet	GBK043052	3.18	Kenya	Otieno et al. 2021	variety	variety
Zinc	Finger millet	GBK043180	2.6	Kenya	Otieno et al. 2021	variety	variety
Zinc	Finger millet	GBK043275	3.46	Kenya	Otieno et al. 2021	variety	variety
Zinc	Finger millet	GBK51717	3.93	Uganda	Otieno et al. 2021	variety	variety
Zinc	Finger millet	GBK051721	3.4	Uganda	Otieno et al. 2021	variety	variety
Zinc	Finger millet	GBK051718	3.09	Uganda	Otieno et al. 2021	variety	variety
Zinc	Finger millet	GBK 051725	3.92	Uganda	Otieno et al. 2021	variety	variety
Zinc	Finger millet	GBK51705	3.65	Uganda	Otieno et al. 2021	variety	variety
Zinc	Finger millet	CHEPNYALTET	3.21	Kenya	Otieno et al. 2021	variety	variety
Zinc	Finger millet	GBK057855	2.92	Uganda	Otieno et al. 2021	variety	variety
Zinc	Finger millet	VL146	2.96	India	Panwar et al. 2016	variety	variety
Zinc	Finger millet	VL149	2.82	India	Panwar et al. 2016	variety	variety
Zinc	Finger millet	VL204	2.72	India	Panwar et al. 2016	variety	variety
Zinc	Finger millet	VL315	2.24	India	Panwar et al. 2016	variety	variety
Zinc	Finger millet	VL324	2	India	Panwar et al. 2016	variety	variety
Zinc	Finger millet	Boneya	0.97	Ethiopia	Adamassu et al. 2009	Improved variety	variety
Zinc	Finger millet	Padet-1	2.56	Ethiopia	Adamassu et al. 2009	Improved variety	variety
Zinc	Finger millet	PBL-1	1.91	Ethiopia	Adamassu et al. 2009	variety	variety
Zinc	Finger millet	PBL-2	1.57	Ethiopia	Adamassu et al. 2009	variety	variety
Zinc	Finger millet	PBL-3	1.69	Ethiopia	Adamassu et al. 2009	variety	variety
Zinc	Finger millet	PBR-1	1.72	Ethiopia	Adamassu et al. 2009	variety	variety
Zinc	Finger millet	PBR-2	1.75	Ethiopia	Adamassu et al. 2009	variety	variety
Zinc	Finger millet	PBR-3	1.71	Ethiopia	Adamassu et al. 2009	variety	variety
Zinc	Finger millet	Tadesse	2.31	Ethiopia	Adamassu et al. 2009	Improved variety	variety
Zinc	Finger millet	GN 1	1.57	India	Nakarani et al. 2020	Genotype	Accession/ genotype
Zinc	Finger millet	GN 2	1.26	India	Nakarani et al. 2020	Genotype	Accession/ genotype
Zinc	Finger millet	GN 3	1.28	India	Nakarani et al. 2020	Genotype	Accession/ genotype
Zinc	Finger millet	GN 4	1.24	India	Nakarani et al. 2020	Genotype	Accession/ genotype
Zinc	Finger millet	GN 5	1.55	India	Nakarani et al. 2020	Genotype	Accession/ genotype
Zinc	Finger millet	GNN 6	1.53	India	Nakarani et al. 2020	Genotype	Accession/ genotype
Zinc	Finger millet	GNN 7	1.74	India	Nakarani et al. 2020	Genotype	Accession/ genotype
Zinc	Finger millet	WN 585	1.61	India	Nakarani et al. 2020	Genotype	Accession/ genotype
Zinc	Finger millet	WN 548	1.72	India	Nakarani et al. 2020	Genotype	Accession/ genotype
Zinc	Finger millet	WN 550	1.39	India	Nakarani et al. 2020	Genotype	Accession/ genotype
Zinc	Finger millet	VL 146	2.89	India	Sharma et al. 2018	Genotype	Accession/ genotype
Zinc	Finger millet	VL 149	3.21	India	Sharma et al. 2018	Genotype	Accession/ genotype
Zinc	Finger millet	VL 201	3.13	India	Sharma et al. 2018	Genotype	Accession/ genotype
Zinc	Finger millet	VL 204	4.33	India	Sharma et al. 2018	Genotype	Accession/ genotype
Zinc	Finger millet	VL 283	3.51	India	Sharma et al. 2018	Genotype	Accession/ genotype
Zinc	Finger millet	VL 305	3.84	India	Sharma et al. 2018	Genotype	Accession/ genotype
Zinc	Finger millet	VL 312	3.29	India	Sharma et al. 2018	Genotype	Accession/ genotype
Zinc	Finger millet	VL 315	2.64	India	Sharma et al. 2018	Genotype	Accession/ genotype
Zinc	Finger millet	VL 324	3.1	India	Sharma et al. 2018	Genotype	Accession/ genotype
Zinc	Finger millet	VL 325	3.57	India	Sharma et al. 2018	Genotype	Accession/ genotype
Zinc	Finger millet	VL 328	3.49	India	Sharma et al. 2018	Genotype	Accession/ genotype
Zinc	Finger millet	VL 330	2.99	India	Sharma et al. 2018	Genotype	Accession/ genotype
Zinc	Finger millet	VL 332	4.09	India	Sharma et al. 2018	Genotype	Accession/ genotype
Zinc	Finger millet	VL 333	3.08	India	Sharma et al. 2018	Genotype	Accession/ genotype
Zinc	Finger millet	VL 336	3.08	India	Sharma et al. 2018	Genotype	Accession/ genotype
Zinc	Finger millet	VL 340	4.67	India	Sharma et al. 2018	Genotype	Accession/ genotype
Zinc	Finger millet	VL 342	3.28	India	Sharma et al. 2018	Genotype	Accession/ genotype
Zinc	Finger millet	VL 348	3.12	India	Sharma et al. 2018	Genotype	Accession/ genotype
Zinc	Finger millet	VL 351	3.94	India	Sharma et al. 2018	Genotype	Accession/ genotype
Zinc	Finger millet	VL 352	3.12	India	Sharma et al. 2018	Genotype	Accession/ genotype
Zinc	Finger millet	VL 357	3.99	India	Sharma et al. 2018	Genotype	Accession/ genotype
Zinc	Finger millet	VL 361	3.88	India	Sharma et al. 2018	Genotype	Accession/ genotype
Zinc	Finger millet	VL 367	2.91	India	Sharma et al. 2018	Genotype	Accession/ genotype
Zinc	Finger millet	VL 369	3.42	India	Sharma et al. 2018	Genotype	Accession/ genotype
Zinc	Finger millet	VL 370	3.49	India	Sharma et al. 2018	Genotype	Accession/ genotype
Zinc	Finger millet	VL 373	3.36	India	Sharma et al. 2018	Genotype	Accession/ genotype
Zinc	Finger millet	VL 374	3.88	India	Sharma et al. 2018	Genotype	Accession/ genotype
Zinc	Finger millet	GE 86	3.13	India	Sharma et al. 2018	Genotype	Accession/ genotype
Zinc	Finger millet	GE 440	3.96	India	Sharma et al. 2018	Genotype	Accession/ genotype
Zinc	Finger millet	GPHCPB 7	3.68	India	Sharma et al. 2018	Genotype	Accession/ genotype
Zinc	Finger millet	GPHCPB 3	3.55	India	Sharma et al. 2018	Genotype	Accession/ genotype
Zinc	Finger millet	GPHCPB 52	4.21	India	Sharma et al. 2018	Genotype	Accession/ genotype
Zinc	Finger millet	GPU4 5	3.57	India	Sharma et al. 2018	Genotype	Accession/ genotype
Zinc	Finger millet	HR 374	3.8	India	Sharma et al. 2018	Genotype	Accession/ genotype
Zinc	Finger millet	VR 708	3.55	India	Sharma et al. 2018	Genotype	Accession/ genotype
Zinc	Finger millet	VL 146	2.89	India	Sharma et al. 2018	Genotype	Accession/ genotype
Zinc	Finger millet	VL 149	3.21	India	Sharma et al. 2018	Genotype	Accession/ genotype
Zinc	Finger millet	VL 201	3.13	India	Sharma et al. 2018	Genotype	Accession/ genotype
Zinc	Finger millet	VL 204	4.33	India	Sharma et al. 2018	Genotype	Accession/ genotype
Zinc	Finger millet	VL 283	3.51	India	Sharma et al. 2018	Genotype	Accession/ genotype
Zinc	Finger millet	VL 305	3.84	India	Sharma et al. 2018	Genotype	Accession/ genotype
Zinc	Finger millet	VL 312	3.29	India	Sharma et al. 2018	Genotype	Accession/ genotype
Zinc	Finger millet	VL 315	2.64	India	Sharma et al. 2018	Genotype	Accession/ genotype
Zinc	Finger millet	VL 324	3.1	India	Sharma et al. 2018	Genotype	Accession/ genotype
Zinc	Finger millet	VL 325	3.57	India	Sharma et al. 2018	Genotype	Accession/ genotype
Zinc	Finger millet	VL 328	3.49	India	Sharma et al. 2018	Genotype	Accession/ genotype
Zinc	Finger millet	VL 330	2.99	India	Sharma et al. 2018	Genotype	Accession/ genotype
Zinc	Finger millet	VL 332	4.09	India	Sharma et al. 2018	Genotype	Accession/ genotype
Zinc	Finger millet	VL 333	3.08	India	Sharma et al. 2018	Genotype	Accession/ genotype
Zinc	Finger millet	VL 336	3.08	India	Sharma et al. 2018	Genotype	Accession/ genotype
Zinc	Finger millet	VL 340	4.67	India	Sharma et al. 2018	Genotype	Accession/ genotype
Zinc	Finger millet	VL 342	3.28	India	Sharma et al. 2018	Genotype	Accession/ genotype
Zinc	Finger millet	VL 348	3.12	India	Sharma et al. 2018	Genotype	Accession/ genotype
Zinc	Finger millet	VL 351	3.94	India	Sharma et al. 2018	Genotype	Accession/ genotype
Zinc	Finger millet	VL 352	3.12	India	Sharma et al. 2018	Genotype	Accession/ genotype
Zinc	Finger millet	VL 357	3.99	India	Sharma et al. 2018	Genotype	Accession/ genotype
Zinc	Finger millet	VL 361	3.88	India	Sharma et al. 2018	Genotype	Accession/ genotype
Zinc	Finger millet	VL 367	2.91	India	Sharma et al. 2018	Genotype	Accession/ genotype
Zinc	Finger millet	VL 369	3.42	India	Sharma et al. 2018	Genotype	Accession/ genotype
Zinc	Finger millet	VL 370	3.49	India	Sharma et al. 2018	Genotype	Accession/ genotype
Zinc	Finger millet	VL 373	3.36	India	Sharma et al. 2018	Genotype	Accession/ genotype
Zinc	Finger millet	VL 374	3.88	India	Sharma et al. 2018	Genotype	Accession/ genotype
Zinc	Finger millet	GE 86	3.13	India	Sharma et al. 2018	Genotype	Accession/ genotype
Zinc	Finger millet	GE 440	3.96	India	Sharma et al. 2018	Genotype	Accession/ genotype
Zinc	Finger millet	GPHCPB 7	3.68	India	Sharma et al. 2018	Genotype	Accession/ genotype
Zinc	Finger millet	GPHCPB 3	3.55	India	Sharma et al. 2018	Genotype	Accession/ genotype
Zinc	Finger millet	GPHCPB 52	4.21	India	Sharma et al. 2018	Genotype	Accession/ genotype
Zinc	Finger millet	GPU4 5	3.57	India	Sharma et al. 2018	Genotype	Accession/ genotype
Zinc	Finger millet	HR 374	3.8	India	Sharma et al. 2018	Genotype	Accession/ genotype
Zinc	Finger millet	VR 708	3.55	India	Sharma et al. 2018	Genotype	Accession/ genotype
Zinc	Finger millet	Ateso	2	Machakos	Shiabiro et al. 2014	Genotype	Accession/ genotype
Zinc	Finger millet	Gulu-E	1.53	Machakos	Shiabiro et al. 2014	Genotype	Accession/ genotype
Zinc	Finger millet	FMV-1	1.53	Machakos	Shiabiro et al. 2014	Genotype	Accession/ genotype
Zinc	Finger millet	KNE-479	1.69	Machakos	Shiabiro et al. 2014	Genotype	Accession/ genotype
Zinc	Finger millet	KNE-1034	1.53	Machakos	Shiabiro et al. 2014	Genotype	Accession/ genotype
Zinc	Finger millet	Nyaikuro	1.84	Machakos	Shiabiro et al. 2014	Genotype	Accession/ genotype
Zinc	Finger millet	GPU-28	6.43	India	Patil et al. 2019	Genotype	Accession/ genotype
Zinc	Finger millet	GPU-48	5.32	India	Patil et al. 2019	Genotype	Accession/ genotype
Zinc	Finger millet	GPU-67	5.11	India	Patil et al. 2019	Genotype	Accession/ genotype
Zinc	Finger millet	VL-149	5.96	India	Patil et al. 2019	Genotype	Accession/ genotype
Zinc	Finger millet	PR-202	5.56	India	Patil et al. 2019	Genotype	Accession/ genotype
Zinc	Finger millet	RAU-8	5.36	India	Patil et al. 2019	Genotype	Accession/ genotype
Zinc	Finger millet	VR-708	5.72	India	Patil et al. 2019	Genotype	Accession/ genotype
Zinc	Finger millet	KOPN-235	6.21	India	Patil et al. 2019	Genotype	Accession/ genotype
Zinc	Finger millet	KMR-204	4.97	India	Patil et al. 2019	Genotype	Accession/ genotype
Zinc	Finger millet	L-5	5.61	India	Patil et al. 2019	Genotype	Accession/ genotype
Zinc	Finger millet	MR-6	5.82	India	Patil et al. 2019	Genotype	Accession/ genotype
Zinc	Finger millet	WN-259	5.08	India	Patil et al. 2019	Genotype	Accession/ genotype
Zinc	Finger millet	GPU-45	5.5	India	Patil et al. 2019	Genotype	Accession/ genotype
Zinc	Finger millet	GPU-66	5.68	India	Patil et al. 2019	Genotype	Accession/ genotype
Zinc	Finger millet	TNAU 1022	5.68	India	Patil et al. 2019	Genotype	Accession/ genotype
Zinc	Finger millet	DM 7	5.82	India	Patil et al. 2019	Genotype	Accession/ genotype
Zinc	Finger millet	PPP 2885	6.07	India	Patil et al. 2019	Genotype	Accession/ genotype
Zinc	Finger millet	OEB 530	5.18	India	Patil et al. 2019	Genotype	Accession/ genotype
Zinc	Finger millet	GE-205	5.34	India	Patil et al. 2019	Genotype	Accession/ genotype
Zinc	Finger millet	GE-406	5.96	India	Patil et al. 2019	Genotype	Accession/ genotype
Zinc	Finger millet	PES-110	4.86	India	Patil et al. 2019	Genotype	Accession/ genotype
Zinc	Finger millet	MR-1	5.57	India	Patil et al. 2019	Genotype	Accession/ genotype
Zinc	Finger millet	GE-942	4.76	India	Patil et al. 2019	Genotype	Accession/ genotype
Zinc	Finger millet	WWN-8	4.33	India	Patil et al. 2019	Genotype	Accession/ genotype
Zinc	Finger millet	WWN-9	5.22	India	Patil et al. 2019	Genotype	Accession/ genotype
Zinc	Finger millet	WWN-10	4.83	India	Patil et al. 2019	Genotype	Accession/ genotype
Zinc	Finger millet	WWN-11	5.32	India	Patil et al. 2019	Genotype	Accession/ genotype
Zinc	Finger millet	WWN-13	5.18	India	Patil et al. 2019	Genotype	Accession/ genotype
Zinc	Finger millet	BR 6	5.5	India	Patil et al. 2019	Genotype	Accession/ genotype
Zinc	Finger millet	GPU 80	5	India	Patil et al. 2019	Genotype	Accession/ genotype
Zinc	Finger millet	GN-1	4.76	India	Patil et al. 2019	Genotype	Accession/ genotype
Zinc	Finger millet	GN-2	4.79	India	Patil et al. 2019	Genotype	Accession/ genotype
Zinc	Finger millet	GN-3	5.15	India	Patil et al. 2019	Genotype	Accession/ genotype
Zinc	Finger millet	GN-4	5.04	India	Patil et al. 2019	Genotype	Accession/ genotype
Zinc	Finger millet	GN-5	5.79	India	Patil et al. 2019	Genotype	Accession/ genotype
Zinc	Finger millet	GPU-28	6.42	India	Patil et al. 2019	Genotype	Accession/ genotype
Zinc	Finger millet	GPU-48	6.01	India	Patil et al. 2019	Genotype	Accession/ genotype
Zinc	Fonio	POOLED	3.8	West Africa, FCT	Stadlmayr et al., 2012	pooled variety	variety
Zinc	Fonio	Finiba/Kassangara	1.9	Mali	Koreissi et al. 2013	variety	variety	landraces
Zinc	Fonio	Die`ni	1.9	Mali	Koreissi et al. 2013	variety	variety	landraces
Zinc	Fonio	Kassangara	2.2	Mali	Koreissi et al. 2013	variety	variety	landraces
Zinc	Fonio	Finiba	2.3	Mali	Koreissi et al. 2013	variety	variety	landraces
Zinc	Fonio	Petema	2.1	Mali	Koreissi et al. 2013	variety	variety	landraces
Zinc	Fonio	Pe´azo 1	2	Mali	Koreissi et al. 2013	variety	variety	landraces
Zinc	Fonio	Tioi	2.2	Mali	Koreissi et al. 2013	variety	variety	landraces
Zinc	Fonio	Peˆye	2.8	Mali	Koreissi et al. 2013	variety	variety	landraces
Zinc	Fonio	Tama	1.9	Mali	Koreissi et al. 2013	variety	variety	landraces
Zinc	Fonio	Tamatioi	2.2	Mali	Koreissi et al. 2013	variety	variety	landraces
Zinc	Fonio	Tamabe´	2.6	Mali	Koreissi et al. 2013	variety	variety	landraces
Zinc	Fonio	Pe´azo 2	2.1	Mali	Koreissi et al. 2013	variety	variety	landraces
Zinc	Foxtail millet	GS 12	4.33	India	Thippeswamy et al. 2017	genotype	Accession/ genotype
Zinc	Foxtail millet	GS 64	2.29	India	Thippeswamy et al. 2017	genotype	Accession/ genotype
Zinc	Foxtail millet	GS 71	9.22	India	Thippeswamy et al. 2017	genotype	Accession/ genotype
Zinc	Foxtail millet	GS 78	11.3	India	Thippeswamy et al. 2017	genotype	Accession/ genotype
Zinc	Foxtail millet	GS 95	3.56	India	Thippeswamy et al. 2017	genotype	Accession/ genotype
Zinc	Foxtail millet	GS 106	4.96	India	Thippeswamy et al. 2017	genotype	Accession/ genotype
Zinc	Foxtail millet	GS 121	11.4	India	Thippeswamy et al. 2017	genotype	Accession/ genotype
Zinc	Foxtail millet	GS 213	5.89	India	Thippeswamy et al. 2017	genotype	Accession/ genotype
Zinc	Foxtail millet	GS 29	3.86	India	Thippeswamy et al. 2017	genotype	Accession/ genotype
Zinc	Foxtail millet	GS 221	4.26	India	Thippeswamy et al. 2017	genotype	Accession/ genotype
Zinc	Foxtail millet	GS 276	3.86	India	Thippeswamy et al. 2017	genotype	Accession/ genotype
Zinc	Foxtail millet	GS 293	2.76	India	Thippeswamy et al. 2017	genotype	Accession/ genotype
Zinc	Foxtail millet	GS 310	3.46	India	Thippeswamy et al. 2017	genotype	Accession/ genotype
Zinc	Foxtail millet	GS 510	3.23	India	Thippeswamy et al. 2017	genotype	Accession/ genotype
Zinc	Foxtail millet	GS 511	2.99	India	Thippeswamy et al. 2017	genotype	Accession/ genotype
Zinc	Foxtail millet	SiA 3085	4.33	India	Thippeswamy et al. 2017	genotype	Accession/ genotype
Zinc	Foxtail millet	Co 7	3.36	India	Thippeswamy et al. 2017	genotype	Accession/ genotype
Zinc	Foxtail millet	SiA 2644	4.13	India	Thippeswamy et al. 2017	genotype	Accession/ genotype
Zinc	Foxtail millet	TNAU 186	3.53	India	Thippeswamy et al. 2017	genotype	Accession/ genotype
Zinc	Foxtail millet	SR 11	2.39	India	Thippeswamy et al. 2017	genotype	Accession/ genotype
Zinc	Foxtail millet	SiA 2593	2.63	India	Thippeswamy et al. 2017	genotype	Accession/ genotype
Zinc	Foxtail millet	FMGPM-9	2.46	India	Thippeswamy et al. 2017	genotype	Accession/ genotype
Zinc	Foxtail millet	PS 4	2.36	India	Thippeswamy et al. 2017	genotype	Accession/ genotype
Zinc	Foxtail millet	HMT-100-1	4.33	India	Thippeswamy et al. 2017	genotype	Accession/ genotype
Zinc	Foxtail millet	SiA 326	3.16	India	Thippeswamy et al. 2017	genotype	Accession/ genotype
Zinc	Foxtail millet	1137	3.77	Syria	Sharma et al. 2014	accession	Accession/ genotype
Zinc	Foxtail millet	1181	4.46	China	Sharma et al. 2014	accession	Accession/ genotype
Zinc	Foxtail millet	1187	4.52	China	Sharma et al. 2014	accession	Accession/ genotype
Zinc	Foxtail millet	1201	3.98	China	Sharma et al. 2014	accession	Accession/ genotype
Zinc	Foxtail millet	1204	4.09	Russia & CISs	Sharma et al. 2014	accession	Accession/ genotype
Zinc	Foxtail millet	1258	4.74	Russia & CISs	Sharma et al. 2014	accession	Accession/ genotype
Zinc	Foxtail millet	1286	7.42	Turkey	Sharma et al. 2014	accession	Accession/ genotype
Zinc	Foxtail millet	1320	5.59	USA	Sharma et al. 2014	accession	Accession/ genotype
Zinc	Foxtail millet	1335	5.02	Hungary	Sharma et al. 2014	accession	Accession/ genotype
Zinc	Foxtail millet	1387	5.93	Sri Lanka	Sharma et al. 2014	accession	Accession/ genotype
Zinc	Foxtail millet	1419	5.72	India	Sharma et al. 2014	accession	Accession/ genotype
Zinc	Foxtail millet	1541	5.19	India	Sharma et al. 2014	accession	Accession/ genotype
Zinc	Foxtail millet	1547	3.36	Korea	Sharma et al. 2014	accession	Accession/ genotype
Zinc	Foxtail millet	1563	3.43	Korea	Sharma et al. 2014	accession	Accession/ genotype
Zinc	Foxtail millet	1575	3.78	Korea	Sharma et al. 2014	accession	Accession/ genotype
Zinc	Foxtail millet	1593	3.74	Korea	Sharma et al. 2014	accession	Accession/ genotype
Zinc	Foxtail millet	1685	4.78	India	Sharma et al. 2014	accession	Accession/ genotype
Zinc	Foxtail millet	1704	5.55	India	Sharma et al. 2014	accession	Accession/ genotype
Zinc	Foxtail millet	1118	3.84	Syria	Sharma et al. 2014	accession	Accession/ genotype
Zinc	Foxtail millet	375	4.2	India	Sharma et al. 2014	accession	Accession/ genotype
Zinc	Foxtail millet	376	4.64	India	Sharma et al. 2014	accession	Accession/ genotype
Zinc	Foxtail millet	748	6.01	India	Sharma et al. 2014	accession	Accession/ genotype
Zinc	Foxtail millet	751	5.52	India	Sharma et al. 2014	accession	Accession/ genotype
Zinc	Foxtail millet	769	4.88	India	Sharma et al. 2014	accession	Accession/ genotype
Zinc	Foxtail millet	771	4.62	India	Sharma et al. 2014	accession	Accession/ genotype
Zinc	Foxtail millet	785	4.44	India	Sharma et al. 2014	accession	Accession/ genotype
Zinc	Foxtail millet	846	4.79	India	Sharma et al. 2014	accession	Accession/ genotype
Zinc	Foxtail millet	1059	4.64	India	Sharma et al. 2014	accession	Accession/ genotype
Zinc	Foxtail millet	1067	4.3	Syria	Sharma et al. 2014	accession	Accession/ genotype
Zinc	Foxtail millet	DHF 2	1.12	India	Brunda et al. 2017	genotype	Accession/ genotype
Zinc	Foxtail millet	DHF 13	1.04	India	Brunda et al. 2017	genotype	Accession/ genotype
Zinc	Foxtail millet	DHF 5	1.19	India	Brunda et al. 2017	genotype	Accession/ genotype
Zinc	Foxtail millet	DHF 18	0.97	India	Brunda et al. 2017	genotype	Accession/ genotype
Zinc	Foxtail millet	DHF 1	0.99	India	Brunda et al. 2017	genotype	Accession/ genotype
Zinc	Foxtail millet	DHF 4	1	India	Brunda et al. 2017	genotype	Accession/ genotype
Zinc	Foxtail millet	DHF 20	1.07	India	Brunda et al. 2017	genotype	Accession/ genotype
Zinc	Foxtail millet	DHF19	1.07	India	Brunda et al. 2017	genotype	Accession/ genotype
Zinc	Foxtail millet	DHF16	0.85	India	Brunda et al. 2017	genotype	Accession/ genotype
Zinc	Foxtail millet	DHF 25	0.91	India	Brunda et al. 2017	genotype	Accession/ genotype
Zinc	Foxtail millet	HMT100-1	1.05	India	Brunda et al. 2017	genotype	Accession/ genotype
Zinc	Foxtail millet	PS 4	1.23	India	Brunda et al. 2017	genotype	Accession/ genotype
Zinc	Foxtail millet	Sia 326	1.13	India	Brunda et al. 2017	genotype	Accession/ genotype
Zinc	Foxtail millet	DHF 6	2.53	India	Brunda et al. 2017	genotype	Accession/ genotype
Zinc	Foxtail millet	DHF 7	1.45	India	Brunda et al. 2017	genotype	Accession/ genotype
Zinc	Foxtail millet	DHF 3	1.33	India	Brunda et al. 2017	genotype	Accession/ genotype
Zinc	Foxtail millet	DHF 17	1.26	India	Brunda et al. 2017	genotype	Accession/ genotype
Zinc	Foxtail millet	GS 2040	1.22	India	Brunda et al. 2017	genotype	Accession/ genotype
Zinc	Foxtail millet	GS 2105	1.22	India	Brunda et al. 2017	genotype	Accession/ genotype
Zinc	Foxtail millet	DHF 13	1.21	India	Brunda et al. 2017	genotype	Accession/ genotype
Zinc	Foxtail millet	H 2	1.21	India	Brunda et al. 2017	genotype	Accession/ genotype
Zinc	Foxtail millet	K 2	1.2	India	Brunda et al. 2017	genotype	Accession/ genotype
Zinc	Foxtail millet	DHF 21	1.2	India	Brunda et al. 2017	genotype	Accession/ genotype
Zinc	Foxtail millet	Ise 375	4.2	India	Sharma et al. 2014	accession	Accession/ genotype
Zinc	Foxtail millet	Ise 376	4.64	India	Sharma et al. 2014	accession	Accession/ genotype
Zinc	Foxtail millet	Ise 748	6.01	India	Sharma et al. 2014	accession	Accession/ genotype
Zinc	Foxtail millet	Ise 751	5.52	India	Sharma et al. 2014	accession	Accession/ genotype
Zinc	Foxtail millet	Ise 769	4.88	India	Sharma et al. 2014	accession	Accession/ genotype
Zinc	Foxtail millet	Ise 771	4.62	India	Sharma et al. 2014	accession	Accession/ genotype
Zinc	Foxtail millet	Ise 785	4.44	India	Sharma et al. 2014	accession	Accession/ genotype
Zinc	Foxtail millet	Ise 846	4.79	India	Sharma et al. 2014	accession	Accession/ genotype
Zinc	Foxtail millet	Ise 1059	4.64	India	Sharma et al. 2014	accession	Accession/ genotype
Zinc	Foxtail millet	Ise 1067	4.3	India	Sharma et al. 2014	accession	Accession/ genotype
Zinc	Foxtail millet	Ise 1137	3.77	Syria	Sharma et al. 2014	accession	Accession/ genotype
Zinc	Foxtail millet	Ise 1181	4.46	China	Sharma et al. 2014	accession	Accession/ genotype
Zinc	Foxtail millet	Ise 1187	4.52	China	Sharma et al. 2014	accession	Accession/ genotype
Zinc	Foxtail millet	Ise 1201	3.98	China	Sharma et al. 2014	accession	Accession/ genotype
Zinc	Foxtail millet	Ise 1204	4.09	Russia & CISs	Sharma et al. 2014	accession	Accession/ genotype
Zinc	Foxtail millet	Ise 1258	4.74	Russia & CISs	Sharma et al. 2014	accession	Accession/ genotype
Zinc	Foxtail millet	Ise 1286	7.42	Turkey	Sharma et al. 2014	accession	Accession/ genotype
Zinc	Foxtail millet	Ise 1320	5.59	USA	Sharma et al. 2014	accession	Accession/ genotype
Zinc	Foxtail millet	Ise 1335	5.02	Hungary	Sharma et al. 2014	accession	Accession/ genotype
Zinc	Foxtail millet	Ise 1387	5.93	Sri Lanka	Sharma et al. 2014	accession	Accession/ genotype
Zinc	Foxtail millet	Ise 1419	5.72	India	Sharma et al. 2014	accession	Accession/ genotype
Zinc	Foxtail millet	Ise 1541	5.19	India	Sharma et al. 2014	accession	Accession/ genotype
Zinc	Foxtail millet	Ise'1547	3.36	Korea	Sharma et al. 2014	accession	Accession/ genotype
Zinc	Foxtail millet	Ise 1563	3.43	Korea	Sharma et al. 2014	accession	Accession/ genotype
Zinc	Foxtail millet	Ise 1575	3.78	Korea	Sharma et al. 2014	accession	Accession/ genotype
Zinc	Foxtail millet	Ise 1593	3.74	Korea	Sharma et al. 2014	accession	Accession/ genotype
Zinc	Foxtail millet	Ise 1685	4.78	India	Sharma et al. 2014	accession	Accession/ genotype
Zinc	Foxtail millet	Ise 1704	5.55	India	Sharma et al. 2014	accession	Accession/ genotype
Zinc	Foxtail millet	Ise 1118	3.84	Syria	Sharma et al. 2014	accession	Accession/ genotype
Zinc	Foxtail millet	ISe 364	5.31		Upadhyaya et al. 2011b	accession	Accession/ genotype
Zinc	Foxtail millet	ISe 388	4.59		Upadhyaya et al. 2011b	accession	Accession/ genotype
Zinc	Foxtail millet	ISe 663	5.43	Switzerland	Upadhyaya et al. 2011b	accession	Accession/ genotype
Zinc	Foxtail millet	ISe 710	4.42	India	Upadhyaya et al. 2011b	accession	Accession/ genotype
Zinc	Foxtail millet	ISe 748	6.01	India	Upadhyaya et al. 2011b	accession	Accession/ genotype
Zinc	Foxtail millet	ISe 846	4.79		Upadhyaya et al. 2011b	accession	Accession/ genotype
Zinc	Foxtail millet	ISe 869	4.62		Upadhyaya et al. 2011b	accession	Accession/ genotype
Zinc	Foxtail millet	ISe 969	4.73		Upadhyaya et al. 2011b	accession	Accession/ genotype
Zinc	Foxtail millet	ISe 1134	5.83		Upadhyaya et al. 2011b	accession	Accession/ genotype
Zinc	Foxtail millet	ISe 1151	4.93		Upadhyaya et al. 2011b	accession	Accession/ genotype
Zinc	Foxtail millet	ISe 1227	5.17		Upadhyaya et al. 2011b	accession	Accession/ genotype
Zinc	Foxtail millet	ISe 1254	4.78	Russia	Upadhyaya et al. 2011b	accession	Accession/ genotype
Zinc	Foxtail millet	ISe 1305	5.1	Spain	Upadhyaya et al. 2011b	accession	Accession/ genotype
Zinc	Foxtail millet	ISe 1312	5.03		Upadhyaya et al. 2011b	accession	Accession/ genotype
Zinc	Foxtail millet	ISe 1419	5.72		Upadhyaya et al. 2011b	accession	Accession/ genotype
Zinc	Foxtail millet	ISe 1458	5.22		Upadhyaya et al. 2011b	accession	Accession/ genotype
Zinc	Foxtail millet	ISe 1581	4.68		Upadhyaya et al. 2011b	accession	Accession/ genotype
Zinc	Foxtail millet	ISe 1610	4.2	Malawi	Upadhyaya et al. 2011b	accession	Accession/ genotype
Zinc	Foxtail millet	ISe 1704	5.55		Upadhyaya et al. 2011b	accession	Accession/ genotype
Zinc	Foxtail millet	ISe 1767	5.39		Upadhyaya et al. 2011b	accession	Accession/ genotype
Zinc	Foxtail millet	ISe 1773	5.34		Upadhyaya et al. 2011b	accession	Accession/ genotype
Zinc	Foxtail millet	ISe 1789	4.78		Upadhyaya et al. 2011b	accession	Accession/ genotype
Zinc	Foxtail millet	ISe 1808	5.52		Upadhyaya et al. 2011b	accession	Accession/ genotype
Zinc	Foxtail millet	ISe 1820	5.6	India	Upadhyaya et al. 2011b	accession	Accession/ genotype
Zinc	Foxtail millet	ISe 1846	5.09		Upadhyaya et al. 2011b	accession	Accession/ genotype
Zinc	Foxtail millet	ISe 1888	4.43	Ethiopia	Upadhyaya et al. 2011b	accession	Accession/ genotype
Zinc	Foxtail millet	ISe 375	4.2	India	Upadhyaya et al. 2011b	accession	Accession/ genotype
Zinc	Foxtail millet	ISe 376	4.64		Upadhyaya et al. 2011b	accession	Accession/ genotype
Zinc	Foxtail millet	ISe 1468	4.13		Upadhyaya et al. 2011b	accession	Accession/ genotype
Zinc	Foxtail millet	ISe 1541	5.19		Upadhyaya et al. 2011b	accession	Accession/ genotype
Zinc	Kodo millet	Pooled	1.65	India, FCT	Longvah et al., 2017	pooled variety	variety
Zinc	Kodo millet	IPs 729	2.135	India	Vetriventhan and Upadhyaya 2019	accession	Accession/ genotype
Zinc	Kodo millet	IPs 222	2.36	India	Vetriventhan and Upadhyaya 2019	accession	Accession/ genotype
Zinc	Kodo millet	IPs 860	2.23	India	Vetriventhan and Upadhyaya 2019	accession	Accession/ genotype
Zinc	Kodo millet	IPs 670	2.28	India	Vetriventhan and Upadhyaya 2019	accession	Accession/ genotype
Zinc	Kodo millet	IPs 77	2.525	India	Vetriventhan and Upadhyaya 2019	accession	Accession/ genotype
Zinc	Kodo millet	IPs 710	2.39	India	Vetriventhan and Upadhyaya 2019	accession	Accession/ genotype
Zinc	Kodo millet	IPs 158	2.285	India	Vetriventhan and Upadhyaya 2019	accession	Accession/ genotype
Zinc	Kodo millet	IPs 585	2.31	India	Vetriventhan and Upadhyaya 2019	accession	Accession/ genotype
Zinc	Kodo millet	IPs 13	2.48	India	Vetriventhan and Upadhyaya 2019	accession	Accession/ genotype
Zinc	Kodo millet	IPs 669	2.15	India	Vetriventhan and Upadhyaya 2019	accession	Accession/ genotype
Zinc	Kodo millet	IPs 279	2.545	India	Vetriventhan and Upadhyaya 2019	accession	Accession/ genotype
Zinc	Kodo millet	IPs 588	2.54	India	Vetriventhan and Upadhyaya 2019	accession	Accession/ genotype
Zinc	Kodo millet	IPs 593	2.61	India	Vetriventhan and Upadhyaya 2019	accession	Accession/ genotype
Zinc	Kodo millet	IPs 686	2.545	India	Vetriventhan and Upadhyaya 2019	accession	Accession/ genotype
Zinc	Kodo millet	IPs 280	2.47	India	Vetriventhan and Upadhyaya 2019	accession	Accession/ genotype
Zinc	Kodo millet	IPs 689	2.455	India	Vetriventhan and Upadhyaya 2019	accession	Accession/ genotype
Zinc	Kodo millet	IPs 4	2.645	India	Vetriventhan and Upadhyaya 2019	accession	Accession/ genotype
Zinc	Kodo millet	IPs 274	2.415	India	Vetriventhan and Upadhyaya 2019	accession	Accession/ genotype
Zinc	Kodo millet	IPs 264	2.405	India	Vetriventhan and Upadhyaya 2019	accession	Accession/ genotype
Zinc	Kodo millet	IPs 614	2.29	India	Vetriventhan and Upadhyaya 2019	accession	Accession/ genotype
Zinc	Kodo millet	IPs 881	2.45	India	Vetriventhan and Upadhyaya 2019	accession	Accession/ genotype
Zinc	Kodo millet	IPs 5	2.545	India	Vetriventhan and Upadhyaya 2019	accession	Accession/ genotype
Zinc	Kodo millet	IPs 575	2.295	India	Vetriventhan and Upadhyaya 2019	accession	Accession/ genotype
Zinc	Kodo millet	IPs 86	2.475	India	Vetriventhan and Upadhyaya 2019	accession	Accession/ genotype
Zinc	Kodo millet	IPs 9	2.435	India	Vetriventhan and Upadhyaya 2019	accession	Accession/ genotype
Zinc	Kodo millet	IPs 83	2.455	India	Vetriventhan and Upadhyaya 2019	accession	Accession/ genotype
Zinc	Kodo millet	IPs 814	2.33	India	Vetriventhan and Upadhyaya 2019	accession	Accession/ genotype
Zinc	Kodo millet	IPs 339	2.235	India	Vetriventhan and Upadhyaya 2019	accession	Accession/ genotype
Zinc	Kodo millet	IPs 287	2.64	India	Vetriventhan and Upadhyaya 2019	accession	Accession/ genotype
Zinc	Kodo millet	IPs 699	2.4	India	Vetriventhan and Upadhyaya 2019	accession	Accession/ genotype
Zinc	Kodo millet	Aamo 101	3.76	India	Nirubana et al. 2017	genotype	Accession/ genotype
Zinc	Kodo millet	TNAU 108	3.76	India	Nirubana et al. 2017	genotype	Accession/ genotype
Zinc	Kodo millet	TNAU 120	3.76	India	Nirubana et al. 2017	genotype	Accession/ genotype
Zinc	Kodo millet	TNAU 130	3.76	India	Nirubana et al. 2017	genotype	Accession/ genotype
Zinc	Kodo millet	TNAU 111	3.76	India	Nirubana et al. 2017	genotype	Accession/ genotype
Zinc	Kodo millet	TNAU 104	3.76	India	Nirubana et al. 2017	genotype	Accession/ genotype
Zinc	Kodo millet	TNAU 137	3.76	India	Nirubana et al. 2017	genotype	Accession/ genotype
Zinc	Kodo millet	IPS 102	3.76	India	Nirubana et al. 2017	genotype	Accession/ genotype
Zinc	Kodo millet	TNAU 146	3.76	India	Nirubana et al. 2017	genotype	Accession/ genotype
Zinc	Kodo millet	TNAU 148	3.76	India	Nirubana et al. 2017	genotype	Accession/ genotype
Zinc	Kodo millet	TNAU 123	3.76	India	Nirubana et al. 2017	genotype	Accession/ genotype
Zinc	Kodo millet	RK 82	3.76	India	Nirubana et al. 2017	genotype	Accession/ genotype
Zinc	Kodo millet	TNAU 150	3.76	India	Nirubana et al. 2017	genotype	Accession/ genotype
Zinc	Kodo millet	TNAU 153	3.76	India	Nirubana et al. 2017	genotype	Accession/ genotype
Zinc	Kodo millet	Sel 16	3.76	India	Nirubana et al. 2017	genotype	Accession/ genotype
Zinc	Kodo millet	TNAU 105	3.76	India	Nirubana et al. 2017	genotype	Accession/ genotype
Zinc	Kodo millet	TNAU 151	3.76	India	Nirubana et al. 2017	genotype	Accession/ genotype
Zinc	Kodo millet	RK 51	3.76	India	Nirubana et al. 2017	genotype	Accession/ genotype
Zinc	Kodo millet	TNAU 141	3.76	India	Nirubana et al. 2017	genotype	Accession/ genotype
Zinc	Kodo millet	Sel 12	3.76	India	Nirubana et al. 2017	genotype	Accession/ genotype
Zinc	Kodo millet	TNAU 98	3.76	India	Nirubana et al. 2017	genotype	Accession/ genotype
Zinc	Kodo millet	TNAU 90	3.76	India	Nirubana et al. 2017	genotype	Accession/ genotype
Zinc	Kodo millet	IPS 122	3.76	India	Nirubana et al. 2017	genotype	Accession/ genotype
Zinc	Kodo millet	TNAU 93	3.76	India	Nirubana et al. 2017	genotype	Accession/ genotype
Zinc	Kodo millet	Sel 1	3.76	India	Nirubana et al. 2017	genotype	Accession/ genotype
Zinc	Kodo millet	ICK 1042	3.76	India	Nirubana et al. 2017	genotype	Accession/ genotype
Zinc	Kodo millet	TNAU 152	3.76	India	Nirubana et al. 2017	genotype	Accession/ genotype
Zinc	Kodo millet	IPS 125	3.76	India	Nirubana et al. 2017	genotype	Accession/ genotype
[truncated: 3,068 more rows]
